# Supplementary material for: Comparative Genomic Insights into Endofungal Lifestyles of Two Bacterial Endosymbionts, Mycoavidus cysteinexigens and Burkholderia rhizoxinica
Source: PubMed Central journal article supplement (PMC5877345; doi:10.1264/jsme2.me17138), 2018-03-29
Supplement: 33_66_s1.pdf [file 33_66_s1.pdf]

**Supplemental Table S1.** Comparison of the annotation results for ortholog clusters derived from the B1-EB<sup>T</sup> and HKI454<sup>T</sup> genomes.

| B1-EB <sup>T</sup> |                                                                                                           | HKI454 <sup>T</sup> |                                                                                      |
|--------------------|-----------------------------------------------------------------------------------------------------------|---------------------|--------------------------------------------------------------------------------------|
| Gene               | Function                                                                                                  | Gene                | Function                                                                             |
| dnaA               | ATPase involved in DNA replication initiation                                                             | RBRH_00964          | Chromosomal replication initiator protein dnaA                                       |
| dnaN               | DNA polymerase sliding clamp subunit (PCNA homolog)                                                       | RBRH_00962          | DNA polymerase III, beta chain                                                       |
| gyrB               | Type IIA topoisomerase (DNA gyrase/topo II, topoisomerase IV), B subunit                                  | RBRH_00960          | DNA gyrase subunit B                                                                 |
| -                  | Retron-type reverse transcriptase                                                                         | RBRH_02254          | Reverse transcriptase                                                                |
| -                  | Hypothetical protein                                                                                      | RBRH_03054          | Unnamed protein product                                                              |
| -                  | Uncharacterized conserved protein                                                                         | RBRH_00791          | Hypothetical protein                                                                 |
| -                  | Hypothetical protein                                                                                      | RBRH_00790          | Unnamed protein product                                                              |
| gidA               | NAD/FAD-utilizing enzyme apparently involved in cell division                                             | RBRH_00815          | Glucose inhibited division protein A                                                 |
| gidB               | Predicted S-adenosylmethionine-dependent methyltransferase involved in bacterial cell division            | RBRH_00816          | Methyltransferase gidB                                                               |
| parA2              | ATPases involved in chromosome partitioning                                                               | RBRH_00817          | Chromosome partitioning protein parA                                                 |
| parB2              | Predicted transcriptional regulators                                                                      | RBRH_00818          | Chromosome partitioning protein parB                                                 |
| atpFOA             | F0F1-type ATP synthase, subunit a                                                                         | RBRH_00821          | ATP synthase A chain                                                                 |
| atpFOC             | F0F1-type ATP synthase, subunit c/Archaeal/vacuolar-type H <sup>+</sup> -ATPase, subunit K                | RBRH_00822          | ATP synthase C chain                                                                 |
| atpFOB             | F0F1-type ATP synthase, subunit b                                                                         | RBRH_00823          | ATP synthase B chain                                                                 |
| atpF1D             | F0F1-type ATP synthase, delta subunit (mitochondrial oligomycin sensitivity protein)                      | RBRH_00824          | ATP synthase delta chain                                                             |
| atpFIG             | F0F1-type ATP synthase, gamma subunit                                                                     | RBRH_00826          | ATP synthase gamma chain                                                             |
| atpF1B             | F0F1-type ATP synthase, beta subunit                                                                      | RBRH_00827          | ATP synthase beta chain                                                              |
| atpC               | F0F1-type ATP synthase, epsilon subunit (mitochondrial delta subunit)                                     | RBRH_00828          | ATP synthase epsilon chain                                                           |
| fumC               | Fumarase                                                                                                  | RBRH_01757          | Aldose 1-dehydrogenase                                                               |
| hemE               | Uroporphyrinogen-III decarboxylase                                                                        | RBRH_00831          | Uroporphyrinogen decarboxylase                                                       |
| putA               | Delta 1-pyrroline-5-carboxylate dehydrogenase                                                             | RBRH_00839          | Proline dehydrogenase / Delta-1-pyrroline-5-carboxylate dehydrogenase                |
| -                  | ABC-type branched-chain amino acid transport systems, periplasmic component                               | RBRH_00840          | Leucine-, isoleucine-, valine-, threonine-, and alanine-binding protein              |
| PMI16_02037        | Predicted Na <sup>+</sup> -dependent transporter                                                          | RBRH_03087          | Transporter, Sodium/bile acid symporter family                                       |
| bioB               | Biotin synthase and related enzymes                                                                       | RBRH_03099          | Biotin synthase                                                                      |
| bioA               | Adenosylmethionine-8-amino-7-oxononanoate aminotransferase                                                | RBRH_03101          | Adenosylmethionine-8-amino-7-oxononanoate aminotransferase                           |
| mnmC               | Uncharacterized conserved protein                                                                         | RBRH_00787          | tRNA (5-aminomethyl-2-thiouridylyl) methyltransferase                                |
| -                  | Bacterial nucleoid DNA-binding protein                                                                    | RBRH_00786          | DNA-binding protein HU                                                               |
| gspD               | Type II secretory pathway, component PulD                                                                 | RBRH_00782          | General secretion pathway protein D                                                  |
| gspE               | Type II secretory pathway, ATPase PulE/Tfp pilus assembly pathway, ATPase PilB                            | RBRH_00781          | General secretion pathway protein E                                                  |
| gspF               | Type II secretory pathway, component PulF                                                                 | RBRH_00780          | General secretion pathway protein F                                                  |
| bglu_1g00350       | Hypothetical protein                                                                                      | RBRH_00779          | Hypothetical protein                                                                 |
| BC1003_3493        | Type II secretory pathway, pseudopilin PulG                                                               | RBRH_00777          | General secretion pathway protein H                                                  |
| gspI               | Type II secretory pathway, pseudopilin PulG                                                               | RBRH_00776          | General secretion pathway protein I                                                  |
| BC1003_3495        | Type II secretory pathway, component PulJ                                                                 | RBRH_00775          | General secretion pathway protein J                                                  |
| Bcep1808_0062      | Type II secretory pathway, component PulK                                                                 | RBRH_00774          | General secretion pathway protein K                                                  |
| Bxe_A4492          | Hypothetical protein                                                                                      | RBRH_00773          | General secretion pathway protein L                                                  |
| BC1003_3498        | Type II secretory pathway, component PulM                                                                 | RBRH_00772          | General secretion pathway protein M                                                  |
| BCh11DRAFT_04780   | Hypothetical protein                                                                                      | RBRH_00771          | Unnamed protein product                                                              |
| -                  | Permeases of the major facilitator superfamily                                                            | RBRH_03630          | Multidrug resistance protein B                                                       |
| -                  | Outer membrane protein                                                                                    | RBRH_00769          | Type I secretion outer membrane protein                                              |
| C664_08243         | 5,10-methylenetetrahydrofolate reductase                                                                  | RBRH_02728          | Methylenetetrahydrofolate reductase                                                  |
| metF               | S-adenosylhomocysteine hydrolase                                                                          | RBRH_02726          | Adenosylhomocysteinase                                                               |
| ahcY               | Amino acid transporters                                                                                   | RBRH_02715          | Amino acid permease                                                                  |
| -                  | S-adenosylmethionine synthetase                                                                           | RBRH_03427          | S-adenosylmethionine synthetase                                                      |
| -                  | Lauroyl/myristoyl acyltransferase                                                                         | RBRH_03425          | Lipid A biosynthesis lauroyl acyltransferase                                         |
| -                  | Diaminopimelate epimerase                                                                                 | RBRH_03424          | Diaminopimelate epimerase                                                            |
| dapF               | Uncharacterized protein conserved in bacteria                                                             | RBRH_03423          | Hypothetical protein                                                                 |
| Bphy_0075          | Site-specific recombinase XerC                                                                            | RBRH_03422          | Integrase/recombinase (XerC/CodV family)                                             |
| xerC               | Predicted membrane protein                                                                                | RBRH_02737          | Permease                                                                             |
| -                  | Predicted membrane protein                                                                                | RBRH_02738          | Permease                                                                             |
| -                  | Uncharacterized proteins, homologs of lactam utilization protein B                                        | RBRH_02739          | Lactam utilization protein LAMB                                                      |
| -                  | Allophanate hydrolase subunit 2                                                                           | RBRH_02740          | Regulator of kinase autophosphorylation inhibitor                                    |
| -                  | Allophanate hydrolase subunit 1                                                                           | RBRH_02742          | Kinase autophosphorylation inhibitor kipl                                            |
| -                  | 5-formyltetrahydrofolate cyclo-ligase                                                                     | RBRH_02745          | 5-formyltetrahydrofolate cyclo-ligase                                                |
| CAGGBEG34_20043    | Soluble lytic murein transglycosylase and related regulatory proteins (some contain LysM/invasin domains) | RBRH_02746          | Soluble lytic murein transglycosylase                                                |
| -                  | tRNA nucleotidyltransferase/poly(A) polymerase                                                            | RBRH_02749          | tRNA nucleotidyltransferase                                                          |
| cca                | Uncharacterized conserved protein                                                                         | RBRH_01965          | Hypothetical protein                                                                 |
| -                  | Dihydroneopterin aldolase                                                                                 | RBRH_01963          | Dihydroneopterin aldolase                                                            |
| -                  | Predicted ATPase of the PP-loop superfamily implicated in cell cycle control                              | RBRH_01962          | tRNA s2C32 biosynthesis protein TtcA                                                 |
| -                  | N-acetylglucosamine-1-phosphate uridylyltransferase                                                       | RBRH_01961          | Glucosamine-1-phosphate acetyltransferase/ UDP-N-acetylglucosamine pyrophosphorylase |
| glmU               | Glucosamine 6-phosphate synthetase, contains amidotransferase and phosphosugar isomerase domains          | RBRH_01960          | Glucosamine--fructose-6-phosphate aminotransferase [isomerizing]                     |
| glmS               | Acetylglutamate semialdehyde dehydrogenase                                                                | RBRH_00370          | N-acetyl-gamma-glutamyl-phosphate reductase                                          |
| argC-1             | Orotate phosphoribosyltransferase                                                                         | RBRH_00372          | Orotate phosphoribosyltransferase                                                    |
| pyrE               | Malic enzyme                                                                                              | RBRH_00373          | NADP-dependent malic enzyme                                                          |
| pyrE               | Malic enzyme                                                                                              | RBRH_03194          | NADP-dependent malic enzyme                                                          |
| oxyR               | Transcriptional regulator                                                                                 | RBRH_01664          | Hydrogen peroxide-inducible genes activator                                          |
| ubiA               | 4-hydroxybenzoate poly(prenyl)transferase and related proteins                                            | RBRH_01663          | 4-hydroxybenzoate poly(prenyl)transferase                                            |
| proC               | Pyroline-5-carboxylate reductase                                                                          | RBRH_01662          | Pyroline-5-carboxylate reductase                                                     |
| -                  | Predicted enzyme with a TIM-barrel fold                                                                   | RBRH_01661          | Hypothetical cytosolic kinase                                                        |
| aroF               | 3-deoxy-D-arabino-heptulosonate 7-phosphate (DAHP) synthase                                               | RBRH_01654          | 3-deoxy-7-phosphoheptulonate synthase                                                |
| tldD               | Predicted Zn-dependent proteases and their inactivated homologs                                           | RBRH_01653          | Microcin-processing peptidase 2 (TldD)                                               |
| Bxe_A3970          | Predicted membrane protein                                                                                | RBRH_01651          | Hypothetical protein                                                                 |
| glmE               | Glutamine synthetase adenylyltransferase                                                                  | RBRH_01650          | Glutamate-ammonia-ligase adenylyltransferase                                         |
| recN               | ATPase involved in DNA repair                                                                             | RBRH_01649          | DNA repair protein recN                                                              |
| ppnK               | Predicted sugar kinase                                                                                    | RBRH_01648          | ATP-NAD kinase                                                                       |
| hrcA               | Transcriptional regulator of heat shock gene                                                              | RBRH_01647          | Heat-inducible transcription repressor hrcA                                          |
| hemH               | Protoheme ferro-lyase (ferrochelataase)                                                                   | RBRH_01646          | Ferrochelataase                                                                      |
| dnaK               | Molecular chaperone                                                                                       | RBRH_01643          | Chaperone protein dnaK                                                               |
| dnaJ               | DnaJ-class molecular chaperone with C-terminal Zn finger domain                                           | RBRH_01642          | Chaperone protein dnaJ                                                               |
| BC1001_0454        | Anthranyl/para-aminobenzoate synthases component I                                                        | RBRH_01641          | Para-aminobenzoate synthetase component I                                            |
| -                  | Topoisomerase IA                                                                                          | RBRH_02474          | Unnamed protein product                                                              |
| -                  | Plasmid stabilization system protein                                                                      | RBRH_02475          | DNA damage inducible protein yafQ                                                    |
| cinA               | Uncharacterized protein (competence- and mitomycin-induced)                                               | RBRH_03198          | Putative competence-damage protein                                                   |
| -                  | Phosphatidylglycerophosphatase A and related proteins                                                     | RBRH_03197          | Phosphatidylglycerophosphatase A                                                     |
| thiL               | Thiamine monophosphate kinase                                                                             | RBRH_03196          | Thiamine-monophosphate kinase                                                        |

|                   |                                                                                         |            |                                                                                                          |
|-------------------|-----------------------------------------------------------------------------------------|------------|----------------------------------------------------------------------------------------------------------|
| macB              | Malic enzyme                                                                            | RBRH_00373 | NADP-dependent malic enzyme                                                                              |
| macB              | Malic enzyme                                                                            | RBRH_03194 | NADP-dependent malic enzyme                                                                              |
| -                 | Hypothetical protein                                                                    | RBRH_03190 | Ribonuclease inhibitor barstar                                                                           |
| -                 | Uncharacterized protein conserved in bacteria                                           | RBRH_03189 | surface protein                                                                                          |
| -                 | Hypothetical protein                                                                    | RBRH_01336 | AmpD protein                                                                                             |
| nth               | Predicted EndoIII-related endonuclease                                                  | RBRH_01335 | Endonuclease III                                                                                         |
| -                 | 3-polyprenyl-4-hydroxybenzoate decarboxylase and related decarboxylases                 | RBRH_01423 | 3-polyprenyl-4-hydroxybenzoate decarboxylase                                                             |
| ribH              | Riboflavin synthase beta-chain                                                          | RBRH_01419 | 6,7-dimethyl-8-ribityllumazine synthase                                                                  |
| ribA              | 3,4-dihydroxy-2-butanone 4-phosphate synthase                                           | RBRH_01418 | GTP cyclohydrolase II/ 3,4-dihydroxy-2-butanone-4-phosphate synthase                                     |
| ribE              | Riboflavin synthase alpha chain                                                         | RBRH_01414 | Riboflavin synthase alpha chain                                                                          |
| ribD              | Pyrimidine reductase, riboflavin biosynthesis                                           | RBRH_01413 | Diaminohydroxyphosphoribosylaminopyrimidine deaminase/ 5-amino-6-(5-phosphoribosylamino)uracil reductase |
| hemL              | Glutamate-1-semialdehyde aminotransferase                                               | RBRH_01412 | Glutamate-1-semialdehyde 2,1-aminomutase                                                                 |
| -                 | ABC-type histidine transport system, ATPase component                                   | RBRH_01406 | Histidine transport ATP-binding protein hisP                                                             |
| -                 | ABC-type arginine transport system, permease component                                  | RBRH_01405 | Histidine transport system permease protein hisQ                                                         |
| -                 | ABC-type amino acid transport/signal transduction systems, periplasmic component/domain | RBRH_02850 | Histidine-binding protein                                                                                |
| -                 | ABC-type nitrate/sulfonate/bicarbonate transport system, ATPase component               | RBRH_01397 | ABC transporter ATP-binding protein                                                                      |
| alaS              | Alanyl-tRNA synthetase                                                                  | RBRH_01067 | Alanyl-tRNA synthetase                                                                                   |
| sirA              | Predicted redox protein, regulator of disulfide bond formation                          | RBRH_01061 | Hypothetical transcriptional regulatory protein                                                          |
| -                 | UDP-glucose pyrophosphorylase                                                           | RBRH_01060 | UTP--glucose-1-phosphate uridylyltransferase                                                             |
| valS              | Valyl-tRNA synthetase                                                                   | RBRH_01058 | Valyl-tRNA synthetase                                                                                    |
| -                 | Transcriptional regulator                                                               | RBRH_03821 | Transcriptional regulator, IctR family                                                                   |
| pyrD              | Dihydroorotate dehydrogenase                                                            | RBRH_03884 | Dihydroorotate dehydrogenase                                                                             |
| -                 | ADP-ribose pyrophosphatase                                                              | RBRH_03881 | Mutator mutT protein (7,8-dihydro-8-oxoguanine-triphosphatase)                                           |
| aat               | Leu/Phe-tRNA-protein transferase                                                        | RBRH_03882 | Leucyl/phenylalanyl-tRNA--protein transferase                                                            |
| -                 | Single-stranded DNA-binding protein                                                     | RBRH_02121 | Single-strand DNA binding protein                                                                        |
| -                 | Permeases of the major facilitator superfamily                                          | RBRH_02122 | Transporter, MFS superfamily                                                                             |
| uvrA              | Excinuclease ATPase subunit                                                             | RBRH_02123 | Excinuclease ABC subunit A                                                                               |
| CAGGBEG34_50005   | Predicted permease                                                                      | RBRH_02124 | Hypothetical membrane spanning protein                                                                   |
| K788_6823         | Hypothetical protein                                                                    | RBRH_03248 | Unnamed protein product                                                                                  |
| secA              | Preprotein translocase subunit SecA (ATPase, RNA helicase)                              | RBRH_03247 | Protein translocase subunit secA                                                                         |
| argJ              | N-acetylglutamate synthase (N-acetylornithine aminotransferase)                         | RBRH_03246 | Glutamate N-acetyltransferase                                                                            |
| -                 | Predicted ATPase (AAA+ superfamily)                                                     | RBRH_03245 | ATP-dependent protease subunit                                                                           |
| mutT              | NTP pyrophosphohydrolases including oxidative damage repair enzymes                     | RBRH_03244 | 7,8-dihydro-8-oxoguanine-triphosphatase                                                                  |
| yacG              | Uncharacterized protein conserved in bacteria                                           | RBRH_03243 | non-essential pilus assembly protein                                                                     |
| -                 | Uncharacterized protein conserved in bacteria                                           | RBRH_03242 | Hypothetical protein                                                                                     |
| coaE              | Dephospho-CoA kinase                                                                    | RBRH_03241 | Dephospho-CoA kinase                                                                                     |
| -                 | Type II secretory pathway, prepilin signal peptidase PulO and related peptidases        | RBRH_03240 | Type 4 prepilin peptidase pilD                                                                           |
| pilC              | Type II secretory pathway, component PulF                                               | RBRH_03239 | Type IV pilus assembly protein tapC                                                                      |
| -                 | Type II secretory pathway, ATPase PulE/Tip pilus assembly pathway, ATPase PilB          | RBRH_03238 | Type 4 pili biogenesis protein pilB (muleotide-binding protein)                                          |
| -                 | Putative Mg <sup>2+</sup> and Co <sup>2+</sup> transporter CorB                         | RBRH_03237 | Magnesium and cobalt efflux protein corC                                                                 |
| ispB              | Geranylgeranyl pyrophosphate synthase                                                   | RBRH_03235 | Farnesyl pyrophosphate synthetase                                                                        |
| -                 | Predicted membrane protein                                                              | RBRH_03659 | Hypothetical membrane spanning protein                                                                   |
| tufA              | GTPases - translation elongation factors                                                | RBRH_04212 | Protein Translation Elongation Factor Tu (EF-TU)                                                         |
| tufA              | GTPases - translation elongation factors                                                | RBRH_01227 | Protein Translation Elongation Factor Tu (EF-TU)                                                         |
| secE              | Preprotein translocase subunit SecE                                                     | RBRH_01696 | Protein translocase subunit secE                                                                         |
| nusG              | Transcription antiterminator                                                            | RBRH_01697 | Transcription antitermination protein nusG                                                               |
| rplA              | Ribosomal protein L1                                                                    | RBRH_01699 | LSU ribosomal protein L1P                                                                                |
| rplJ              | Ribosomal protein L10                                                                   | RBRH_01701 | LSU ribosomal protein L10P                                                                               |
| rplL              | Ribosomal protein L7/L12                                                                | RBRH_01702 | LSU ribosomal protein L12P (L7/L12)                                                                      |
| rpoC              | DNA-directed RNA polymerase, beta' subunit/160 kD subunit                               | RBRH_01706 | DNA-directed RNA polymerase beta' chain                                                                  |
| CAGGBEG34_190142  | Hypothetical protein                                                                    | RBRH_04009 | Phage-related protein                                                                                    |
| recQ              | Superfamily II DNA helicase                                                             | RBRH_01709 | ATP-dependent DNA helicase recQ                                                                          |
| rpsG              | Ribosomal protein S7                                                                    | RBRH_01229 | SSU ribosomal protein S7P                                                                                |
| fusA1             | Translation elongation factors (GTPases)                                                | RBRH_00951 | Protein Translation Elongation Factor G (EF-G)                                                           |
| fusA1             | Translation elongation factors (GTPases)                                                | RBRH_01228 | protein=Protein Translation Elongation Factor G (EF-G)                                                   |
| rpsJ              | Ribosomal protein S10                                                                   | RBRH_04209 | SSU ribosomal protein S10P                                                                               |
| rplC              | Ribosomal protein L3                                                                    | RBRH_02372 | LSU ribosomal protein L3P                                                                                |
| rplD              | Ribosomal protein L4                                                                    | RBRH_02371 | LSU ribosomal protein L1E (= L4P)                                                                        |
| rplW              | Ribosomal protein L23                                                                   | RBRH_02370 | LSU ribosomal protein L23P                                                                               |
| rplB              | Ribosomal protein L2                                                                    | RBRH_02369 | LSU ribosomal protein L2P                                                                                |
| rpsS              | Ribosomal protein S19                                                                   | RBRH_02368 | SSU ribosomal protein S19P                                                                               |
| rplV              | Ribosomal protein L22                                                                   | RBRH_02367 | LSU ribosomal protein L22P                                                                               |
| rpsC              | Ribosomal protein S3                                                                    | RBRH_02366 | SSU ribosomal protein S3P                                                                                |
| rplP              | Ribosomal protein L16/L10E                                                              | RBRH_02365 | LSU ribosomal protein L16P                                                                               |
| rpmC              | Ribosomal protein L29                                                                   | RBRH_02364 | LSU ribosomal protein L29P                                                                               |
| rpsQ              | Ribosomal protein S17                                                                   | RBRH_02363 | SSU ribosomal protein S17P                                                                               |
| -                 | Ribosomal protein L14                                                                   | RBRH_02361 | LSU ribosomal protein L14P                                                                               |
| rplX              | Ribosomal protein L24                                                                   | RBRH_02360 | LSU ribosomal protein L24P                                                                               |
| rplE              | Ribosomal protein L5                                                                    | RBRH_02359 | LSU ribosomal protein L5P                                                                                |
| rpsN              | Ribosomal protein S14                                                                   | RBRH_02358 | SSU ribosomal protein S14P                                                                               |
| rpsH              | Ribosomal protein S8                                                                    | RBRH_02357 | SSU ribosomal protein S8P                                                                                |
| rplR              | Ribosomal protein L18                                                                   | RBRH_02355 | LSU ribosomal protein L18P                                                                               |
| rpsE              | Ribosomal protein S5                                                                    | RBRH_02354 | SSU ribosomal protein S5P                                                                                |
| rpmD              | Ribosomal protein L30/L7E                                                               | RBRH_02353 | LSU ribosomal protein L30P                                                                               |
| rplO              | Ribosomal protein L15                                                                   | RBRH_02352 | LSU ribosomal protein L15P                                                                               |
| secY              | Preprotein translocase subunit SecY                                                     | RBRH_02351 | Protein translocase subunit secY                                                                         |
| infA              | Translation initiation factor 1 (IF-1)                                                  | RBRH_02350 | Bacterial Protein Translation Initiation Factor 1 (IF-1)                                                 |
| rpsM              | Ribosomal protein S13                                                                   | RBRH_02347 | SSU ribosomal protein S13P                                                                               |
| rpsK              | Ribosomal protein S11                                                                   | RBRH_02346 | SSU ribosomal protein S11P                                                                               |
| rpsD              | Ribosomal protein S4 and related proteins                                               | RBRH_02344 | SSU ribosomal protein S4P                                                                                |
| rpoA              | DNA-directed RNA polymerase, alpha subunit/40 kD subunit                                | RBRH_02343 | DNA-directed RNA polymerase alpha chain                                                                  |
| rplQ              | Ribosomal protein L17                                                                   | RBRH_02342 | LSU ribosomal protein L17P                                                                               |
| BamMEX5DRAFT_2889 | Thiol:disulfide interchange protein                                                     | RBRH_02340 | Thiol:disulfide interchange protein DsbD                                                                 |
| hemB              | Delta-aminolevulinic acid dehydratase                                                   | RBRH_02338 | Delta-aminolevulinic acid dehydratase                                                                    |
| CAGGBEG34_190142  | Hypothetical protein                                                                    | RBRH_04009 | Phage-related protein                                                                                    |
| engB              | Predicted GTPase                                                                        | RBRH_02337 | GTP-binding protein YihA                                                                                 |
| -                 | Cytochrome c553                                                                         | RBRH_02336 | Cytochrome c4                                                                                            |
| -                 | ResB protein required for cytochrome c biosynthesis                                     | RBRH_02335 | Heme export protein ResB                                                                                 |
| -                 | ABC-type transport system involved in cytochrome c biogenesis, permease component       | RBRH_02334 | Heme export protein ResC / Apocytochrome heme-lyase                                                      |
| lysA              | Diaminopimelate decarboxylase                                                           | RBRH_02333 | Diaminopimelate decarboxylase                                                                            |
| cyaY              | Protein implicated in iron transport, frataxin homolog                                  | RBRH_02331 | Frataxin family protein                                                                                  |
| -                 | Membrane carboxypeptidase/penicillin-binding protein                                    | RBRH_02330 | Multimodular transpeptidase-transglycosylase PBP 1A                                                      |
| -                 | Membrane carboxypeptidase/penicillin-binding protein                                    | RBRH_00133 | Multimodular transpeptidase-transglycosylase PBP 1A                                                      |

|                  |                                                                                             |            |                                                                                                    |
|------------------|---------------------------------------------------------------------------------------------|------------|----------------------------------------------------------------------------------------------------|
| BY123_A024070    | Tfp pilus assembly protein, ATPase PilM                                                     | RBRH_02329 | Pili assembly protein PILM                                                                         |
| aroK             | Shikimate kinase                                                                            | RBRH_02325 | Shikimate kinase                                                                                   |
| aroB             | 3-dehydroquinate synthetase                                                                 | RBRH_02324 | 3-dehydroquinate synthase                                                                          |
| dgt              | dGTP triphosphohydrolase                                                                    | RBRH_02323 | Deoxyguanosinetriphosphate triphosphohydrolase                                                     |
| PMI06_006043     | Outer membrane protein W                                                                    | RBRH_02318 | Outer membrane protein                                                                             |
| -                | ABC-type transport system involved in resistance to organic solvents, ATPase component      | RBRH_02304 | Toluene transport system ATP-binding protein                                                       |
| -                | ABC-type transport system involved in resistance to organic solvents, permease component    | RBRH_02303 | Toluene transport system permease                                                                  |
| -                | ABC-type transport system involved in resistance to organic solvents, periplasmic component | RBRH_02302 | Toluene transport system Ttg2C protein                                                             |
| BURK_006002      | ABC-type transport system involved in resistance to organic solvents, auxiliary component   | RBRH_02300 | Toluene transport system Ttg2D protein                                                             |
| -                | Predicted NTP binding protein (contains STAS domain)                                        | RBRH_02299 | Toluene transport system Ttg2E protein                                                             |
| -                | ABC-type multidrug transport system, ATPase component                                       | RBRH_02298 | ABC transporter ATP-binding protein                                                                |
| -                | ABC-type multidrug transport system, permease component                                     | RBRH_02297 | ABC transporter permease protein                                                                   |
| murA             | UDP-N-acetylglucosamine enolpyruvyl transferase                                             | RBRH_02295 | UDP-N-acetylglucosamine 1-carboxyvinyltransferase                                                  |
| hisG             | ATP phosphoribosyltransferase                                                               | RBRH_02294 | ATP phosphoribosyltransferase                                                                      |
| hisD             | Histidinol dehydrogenase                                                                    | RBRH_02293 | Histidinol dehydrogenase                                                                           |
| hisC             | Histidinol-phosphate/aromatic aminotransferase and cobyrinic acid decarboxylase             | RBRH_02292 | Histidinol-phosphate aminotransferase                                                              |
| hisB             | Imidazoleglycerol-phosphate dehydratase                                                     | RBRH_02291 | Imidazoleglycerol-phosphate dehydratase                                                            |
| hisH             | Glutamine amidotransferase                                                                  | RBRH_02289 | Imidazole glycerol phosphate synthase, glutamine amidotransferase subunit                          |
| hisA             | Phosphoribosylformimino-5-aminoimidazole carboxamide ribonucleotide (ProFAR) isomerase      | RBRH_02288 | 1-(5-phosphoribosyl)-5-[(5-phosphoribosylamino)methylideneamino] imidazole-4-carboxamide isomerase |
| hisF             | Imidazoleglycerol-phosphate synthase                                                        | RBRH_02287 | Imidazole glycerol phosphate synthase, cyclase subunit                                             |
| hisI             | Phosphoribosyl-AMP cyclohydrolase                                                           | RBRH_02286 | Phosphoribosyl-AMP cyclohydrolase                                                                  |
| -                | Diadenosine tetraphosphate (Ap4A) hydrolase and other HIT family hydrolases                 | RBRH_02283 | Adenosine 5'-monophosphoramidase/Guanosine 5'-monophosphoramidase                                  |
| tatA             | Sec-independent protein secretion pathway components                                        | RBRH_02282 | Sec-independent protein translocase protein tatA                                                   |
| tatB             | Sec-independent protein secretion pathway components                                        | RBRH_02281 | Sec-independent protein translocase protein tatB                                                   |
| tatC             | Sec-independent protein secretion pathway component TatC                                    | RBRH_02280 | Sec-independent protein translocase protein tatC                                                   |
| -                | Trypsin-like serine proteases, typically periplasmic, contain C-terminal PDZ domain         | RBRH_02279 | Endopeptidase degP                                                                                 |
| -                | Uncharacterized conserved protein                                                           | RBRH_02278 | NIF3-related protein                                                                               |
| -                | Rieske Fe-S protein                                                                         | RBRH_02276 | Ubiquinol-cytochrome c reductase iron-sulfur subunit                                               |
| petB             | Cytochrome b subunit of the bc complex                                                      | RBRH_02275 | Cytochrome b                                                                                       |
| -                | Cytochrome c1                                                                               | RBRH_02274 | Cytochrome c1                                                                                      |
| sspA             | Glutathione S-transferase                                                                   | RBRH_02273 | Stringent starvation protein A                                                                     |
| -                | Transposase and inactivated derivatives                                                     | RBRH_02476 | Transposase                                                                                        |
| istB             | DNA replication protein                                                                     | RBRH_04199 | Transposase                                                                                        |
| istB             | DNA replication protein                                                                     | RBRH_01553 | Transposase                                                                                        |
| -                | Transposase and inactivated derivatives                                                     | RBRH_03764 | Transposase                                                                                        |
| -                | Predicted GTPase, probable translation factor                                               | RBRH_02396 | GTP-binding protein, probable translation factor                                                   |
| ubiH             | 2-polyphenyl-6-methoxyphenol hydroxylase and related FAD-dependent oxidoreductases          | RBRH_02393 | Putative monoxygenase VisC                                                                         |
| -                | Predicted protease with the C-terminal PDZ domain                                           | RBRH_02391 | M61 glycyI aminopeptidase                                                                          |
| SG1089           | Hypothetical protein                                                                        | RBRH_04009 | Phage-related protein                                                                              |
| -                | Indole-3-glycerol phosphate synthase                                                        | RBRH_02387 | Indole-3-glycerol phosphate synthase                                                               |
| trpD             | Anthranilate phosphoribosyltransferase                                                      | RBRH_02386 | Anthranilate phosphoribosyltransferase                                                             |
| trpG             | Anthranilate/para-aminobenzoate synthases component II                                      | RBRH_02385 | Anthranilate synthase component II                                                                 |
| trpE             | Anthranilate/para-aminobenzoate synthases component I                                       | RBRH_02384 | Anthranilate synthase component I                                                                  |
| rpe              | Pentose-5-phosphate-3-epimerase                                                             | RBRH_02382 | Ribulose-phosphate 3-epimerase                                                                     |
| apaG             | Uncharacterized protein affecting Mg <sup>2+</sup> /Co <sup>2+</sup> transport              | RBRH_02381 | ApaG protein                                                                                       |
| ubiB             | Predicted unusual protein kinase                                                            | RBRH_02099 | 2-polyphenylphenol 6-hydroxylase accessory protein ubiB                                            |
| -                | Uncharacterized conserved protein                                                           | RBRH_02096 | Hypothetical membrane spanning protein                                                             |
| aspS             | Aspartyl-tRNA synthetase                                                                    | RBRH_02095 | Aspartyl-tRNA synthetase                                                                           |
| ntpA             | NTP pyrophosphohydrolases including oxidative damage repair enzymes                         | RBRH_02094 | dATP pyrophosphohydrolase                                                                          |
| -                | Acyl-CoA dehydrogenases                                                                     | RBRH_02090 | Acyl-CoA dehydrogenase                                                                             |
| fadA             | Acetyl-CoA acetyltransferase                                                                | RBRH_02087 | 3-ketoacyl-CoA thiolase                                                                            |
| -                | Acyl-CoA hydrolase                                                                          | RBRH_02083 | Acyl-CoA hydrolase                                                                                 |
| gdhA             | Glutamate dehydrogenase/leucine dehydrogenase                                               | RBRH_02080 | Glutamate dehydrogenase                                                                            |
| -                | ABC-type amino acid transport/signal transduction systems, periplasmic component/domain     | RBRH_02079 | Glutamate/aspartate-binding protein                                                                |
| glfJ             | ABC-type amino acid transport system, permease component                                    | RBRH_02078 | Glutamate/aspartate transport system permease protein glfJ                                         |
| -                | ABC-type amino acid transport system, permease component                                    | RBRH_02077 | Glutamate/aspartate transport system permease protein glfK                                         |
| -                | ABC-type polar amino acid transport system, ATPase component                                | RBRH_02076 | Glutamate/aspartate transport ATP-binding protein glfL                                             |
| argD             | Ornithine/acetylornithine aminotransferase                                                  | RBRH_00911 | Acetylornithine aminotransferase                                                                   |
| ascD             | 2-polyphenylphenol hydroxylase and related flavodoxin oxidoreductases                       | RBRH_00910 | Flavodoxin reductase family protein                                                                |
| BCh11DRAFT_05379 | Nucleoside-diphosphate-sugar epimerases                                                     | RBRH_00906 | Nucleoside-diphosphate-sugar epimerases                                                            |
| -                | Glutaredoxin-related protein                                                                | RBRH_02408 | Glutaredoxin                                                                                       |
| -                | 3-polyphenyl-4-hydroxybenzoate decarboxylase                                                | RBRH_02409 | 3-polyphenyl-4-hydroxybenzoate decarboxylase ubiX                                                  |
| CAGGBEG34_220024 | Phosphotransferase system IIC components, glucose/maltose/N-acetylglucosamine-specific      | RBRH_01185 | Holin                                                                                              |
| -                | Transposase and inactivated derivatives                                                     | RBRH_02476 | Transposase                                                                                        |
| Neut_1498        | Integrase                                                                                   | RBRH_01051 | Unnamed protein product                                                                            |
| CAGGBEG34_220024 | Permeases of the major facilitator superfamily                                              | RBRH_01185 | Holin                                                                                              |
| -                | Hypothetical protein                                                                        | RBRH_01189 | Lysozyme                                                                                           |
| -                | Hypothetical protein                                                                        | RBRH_01186 | Lysozyme                                                                                           |
| L682_09955       | Uncharacterized homolog of phage Mu protein gp47                                            | RBRH_01193 | Unnamed protein product                                                                            |
| L682_09945       | Hypothetical protein                                                                        | RBRH_01195 | phage-related protein                                                                              |
| HIB_15810        | Hypothetical protein                                                                        | RBRH_01196 | Unnamed protein product                                                                            |
| -                | Predicted transcriptional regulator                                                         | RBRH_01522 | Hypothetical cytosolic protein                                                                     |
| BC1002_6556      | Hypothetical protein                                                                        | RBRH_01199 | Unnamed protein product                                                                            |
| L682_09905       | Hypothetical protein                                                                        | RBRH_01202 | Unnamed protein product                                                                            |
| XFEB_01759       | Uncharacterized protein, homolog of phage Mu protein gp30                                   | RBRH_01211 | Unnamed protein product                                                                            |
| -                | Uncharacterized protein conserved in bacteria                                               | RBRH_01213 | large terminase subunit                                                                            |
| CAGGBEG34_610004 | Methyl-accepting chemotaxis protein                                                         | RBRH_01048 | Unnamed protein product                                                                            |
| -                | Integrase                                                                                   | RBRH_01051 | Unnamed protein product                                                                            |
| -                | Ferredoxin                                                                                  | RBRH_02590 | Ferredoxin                                                                                         |
| -                | Na <sup>+</sup> /H <sup>+</sup> antiporter NhaD and related arsenite permeases              | RBRH_02593 | Hypothetical membrane spanning protein                                                             |
| -                | Uncharacterized protein conserved in bacteria                                               | RBRH_02595 | RmuC family protein                                                                                |
| -                | Hypothetical protein                                                                        | RBRH_02596 | Unnamed protein product                                                                            |
| -                | Methylase of polypeptide chain release factors                                              | RBRH_02405 | Peptide release factor-glutamine N5-methyltransferase                                              |
| prfA             | Protein chain release factor A                                                              | RBRH_02404 | Bacterial Peptide Chain Release Factor 1                                                           |
| -                | Predicted ATPase related to phosphate starvation-inducible protein PhoH                     | RBRH_02596 | PhoH protein                                                                                       |

|                  |                                                                                                                        |            |                                                                       |
|------------------|------------------------------------------------------------------------------------------------------------------------|------------|-----------------------------------------------------------------------|
| bcp              | Peroxioredoxin                                                                                                         | RBRH_03685 | Thioredoxin peroxidase                                                |
| -                | Predicted xylanase/chitin deacetylase                                                                                  | RBRH_03686 | Chitoooligosaccharide deacetylase                                     |
| -                | Nucleoside-diphosphate-sugar epimerases                                                                                | RBRH_03682 | UDP-glucuronate 4-dehydrogenase (decarboxylating)                     |
| pmrIa            | Methionyl-tRNA formyltransferase                                                                                       | RBRH_03684 | UDP-4-amino-4-deoxy-L-arabinose N-formyltransferase                   |
| pmrF             | Glycosyltransferases involved in cell wall biogenesis                                                                  | RBRH_03680 | Undecaprenyl-phosphate alpha-4-amino-L-arabinosyltransferase          |
| pmrH             | Predicted pyridoxal phosphate-dependent enzyme apparently involved in regulation of cell wall biogenesis               | RBRH_03679 | UDP-4-amino-L-arabinose synthase                                      |
| -                | Permeases of the drug/metabolic transporter (DMT) superfamily                                                          | RBRH_03678 | Quaternary ammonium compound-resistance protein                       |
| arnT             | 4-amino-4-deoxy-L-arabinose transferase and related glycosyltransferases of PMT family                                 | RBRH_03677 | Glycosyltransferase                                                   |
| -                | Aspartate/tyrosine/aromatic aminotransferase                                                                           | RBRH_03675 | Probable aminotransferase yfbQ                                        |
| pyrF             | Orotidine-5'-phosphate decarboxylase                                                                                   | RBRH_03199 | Orotidine 5'-phosphate decarboxylase                                  |
| C265_18829       | Transcriptional regulator                                                                                              | RBRH_02657 | Transcriptional regulators, LysR family                               |
| BN113_0351       | Transcriptional regulator                                                                                              | RBRH_02721 | Transcriptional regulators, LysR family                               |
| -                | ATPase components of ABC transporters with duplicated ATPase domains                                                   | RBRH_01375 | ABC transporter ATP-binding protein uup                               |
| parE             | Type IIA topoisomerase (DNA gyrase/topo II, topoisomerase IV), B subunit                                               | RBRH_01374 | Topoisomerase IV subunit B                                            |
| parC             | Type IIA topoisomerase (DNA gyrase/topo II, topoisomerase IV), A subunit                                               | RBRH_01373 | Topoisomerase IV subunit A                                            |
| aspC             | Aspartate/tyrosine/aromatic aminotransferase                                                                           | RBRH_02874 | Aromatic-amino-acid aminotransferase                                  |
| -                | Helicase subunit of the DNA excision repair complex                                                                    | RBRH_02875 | Excinuclease ABC subunit B                                            |
| RBRH_00986       | Permeases of the drug/metabolic transporter (DMT) superfamily                                                          | RBRH_00986 | Transporter, drug/metabolite exporter family                          |
| greB             | Transcription elongation factor                                                                                        | RBRH_01007 | Transcription elongation factor greB                                  |
| spoT             | Guanosine polyphosphate pyrophosphohydrolases/synthetases                                                              | RBRH_01008 | GTP pyrophosphokinase                                                 |
| rpoZ             | DNA-directed RNA polymerase, subunit K/omega                                                                           | RBRH_01009 | DNA-directed RNA polymerase omega chain                               |
| gmK              | Guanylate kinase                                                                                                       | RBRH_01010 | Guanylate kinase                                                      |
| rph              | RNase PH                                                                                                               | RBRH_01013 | Ribonuclease PH                                                       |
| -                | Xanthosine triphosphate pyrophosphatase                                                                                | RBRH_01014 | Xanthosine triphosphate pyrophosphatase                               |
| hemN             | Coproporphyrinogen III oxidase and related Fe-S oxidoreductases                                                        | RBRH_01015 | Oxygen-independent coproporphyrinogen-III oxidase                     |
| talA             | Transaldolase                                                                                                          | RBRH_01343 | Transaldolase                                                         |
| -                | Protein involved in catabolism of external DNA                                                                         | RBRH_02873 | Protein involved in external DNA uptake                               |
| surE             | Predicted acid phosphatase                                                                                             | RBRH_03744 | Acid phosphatase surE                                                 |
| -                | Protein-L-isoaspartate carboxylmethyltransferase                                                                       | RBRH_03743 | Protein-L-isoaspartate O-methyltransferase                            |
| -                | Membrane proteins related to metalloendopeptidases                                                                     | RBRH_03742 | Peptidoglycan-specific endopeptidase, M23 family                      |
| -                | Transposase and inactivated derivatives, IS5 family                                                                    | RBRH_03381 | Transposase                                                           |
| -                | Predicted 3'-5' exonuclease related to the exonuclease domain of PolB                                                  | RBRH_03740 | Hypothetical cytosolic protein                                        |
| groES            | Co-chaperonin GroES (HSP10)                                                                                            | RBRH_01487 | 0 kDa chaperonin GROES                                                |
| groEL            | Chaperonin GroEL (HSP60 family)                                                                                        | RBRH_01486 | 60 kDa chaperonin GROEL                                               |
| -                | Rubredoxin                                                                                                             | RBRH_01484 | Rubredoxin                                                            |
| -                | Putative transcriptional regulator                                                                                     | RBRH_01481 | Transcriptional regulator, algH                                       |
| yqqF             | Predicted endonuclease involved in recombination (possible Holliday junction resolvase in Mycoplasmas and B. subtilis) | RBRH_01480 | Hypothetical cytosolic protein                                        |
| -                | Pyrimidine operon attenuation protein/uracil phosphoribosyltransferase                                                 | RBRH_01479 | Uracil phosphoribosyltransferase                                      |
| pyrB             | Aspartate carbamoyltransferase, catalytic chain                                                                        | RBRH_01477 | Aspartate carbamoyltransferase                                        |
| pyrC             | Dihydroorotase and related cyclic amidohydrolases                                                                      | RBRH_01476 | Aspartate carbamoyltransferase non-catalytic chain                    |
| K788_7818        | 1-acyl-sn-glycerol-3-phosphate acyltransferase                                                                         | RBRH_01475 | 1-acyl-sn-glycerol-3-phosphate acyltransferase                        |
| CAGGBEG34_200100 | Uncharacterized protein conserved in bacteria                                                                          | RBRH_01545 | Hypothetical exported protein                                         |
| -                | Uncharacterized protein SCO1/SenC/PrrC, involved in biogenesis of respiratory and photosynthetic systems               | RBRH_02431 | SCO2 protein precursor                                                |
| -                | ABC-type multidrug transport system, ATPase and permease components                                                    | RBRH_02428 | Multidrug resistance ABC transporter ATP-binding and permease protein |
| -                | Glycosyltransferase                                                                                                    | RBRH_00363 | Glycosyltransferase                                                   |
| -                | Glycosyltransferase                                                                                                    | RBRH_02426 | Glycosyltransferase                                                   |
| -                | Hypothetical protein                                                                                                   | RBRH_02876 | 34 kDa membrane antigen precursor                                     |
| -                | High-affinity Fe2+/Pb2+ permease                                                                                       | RBRH_02878 | High-affinity iron permease                                           |
| -                | Polyferredoxin                                                                                                         | RBRH_02879 | Nitrogen fixation protein vnfA                                        |
| -                | Membrane-fusion protein                                                                                                | RBRH_01297 | Acriflavin resistance periplasmic protein                             |
| -                | Cation/multidrug efflux pump                                                                                           | RBRH_01296 | Acriflavin resistance plasma membrane protein                         |
| -                | Outer membrane protein                                                                                                 | RBRH_01295 | Type I secretion outer membrane protein                               |
| -                | ABC-type Mn2+/Zn2+ transport systems, permease components                                                              | RBRH_01292 | Manganese transport system membrane protein                           |
| -                | ABC-type Mn/Zn transport systems, ATPase component                                                                     | RBRH_01291 | Manganese transport system ATP-binding protein                        |
| -                | ABC-type metal ion transport system, periplasmic component/surface adhesion                                            | RBRH_01290 | Manganese-binding protein                                             |
| CAGGBEG34_200017 | Tip pilus assembly protein PilW                                                                                        | RBRH_01538 | Unnamed protein product                                               |
| Bcep1808_0746    | Predicted membrane protein                                                                                             | RBRH_01542 | Hypothetical protein                                                  |
| -                | Uncharacterized conserved protein                                                                                      | RBRH_01543 | ElaB protein                                                          |
| mstA             | Peptide methionine sulfoxide reductase                                                                                 | RBRH_01085 | Peptide methionine sulfoxide reductase mstA                           |
| pdxH             | Pyridoxamine-phosphate oxidase                                                                                         | RBRH_01081 | Pyridoxamine 5'-phosphate oxidase                                     |
| glnS             | Glutamyl- and glutamyl-tRNA synthetases                                                                                | RBRH_01072 | Glutamyl-tRNA synthetase                                              |
| -                | Predicted sugar phosphatase isomerase involved in capsule formation                                                    | RBRH_02131 | Arabinose-5-phosphate isomerase                                       |
| kdsC             | Low specificity phosphatase (HAD superfamily)                                                                          | RBRH_02132 | 3-deoxy-manno-octulosonate-8-phosphatase                              |
| MYA_2549         | Uncharacterized protein conserved in bacteria                                                                          | RBRH_02133 | Unnamed protein product                                               |
| Bphyt_0598       | Uncharacterized protein conserved in bacteria                                                                          | RBRH_02134 | Protein yhbN precursor                                                |
| -                | ABC-type (unclassified) transport system, ATPase component                                                             | RBRH_02135 | ABC transporter ATP-binding protein                                   |
| ptsN             | Phosphotransferase system mannitol/fructose-specific IIA domain (Ntr-type)                                             | RBRH_02140 | Nitrogen regulatory IIA protein                                       |
| hprK             | Serine kinase of the HPr protein, regulates carbohydrate metabolism                                                    | RBRH_02141 | HPR(Ser) Kinase/Phosphatase                                           |
| -                | Predicted P-loop-containing kinase                                                                                     | RBRH_02142 | ATP-binding protein (contains P-loop)                                 |
| RBRH_00029       | Hypothetical protein                                                                                                   | RBRH_00029 | Unnamed protein product                                               |
| -                | Cytochrome c553                                                                                                        | RBRH_01338 | Cytochrome c-554                                                      |
| -                | Cytochrome c553                                                                                                        | RBRH_01337 | Cytochrome c-554(548)                                                 |
| hemA             | Glutamyl-tRNA reductase                                                                                                | RBRH_02403 | Glutamyl-tRNA reductase                                               |
| -                | Xaa-Pro aminopeptidase                                                                                                 | RBRH_02401 | Xaa-Pro aminopeptidase                                                |
| CAGGBEG34_240007 | Response regulator containing a CheY-like receiver domain and an HTH DNA-binding domain                                | RBRH_01136 | Transcriptional regulator, LuxR family                                |
| -                | Hypothetical protein                                                                                                   | RBRH_01137 | Hypothetical protein                                                  |
| -                | Ribonucleases G and E                                                                                                  | RBRH_02601 | Ribonuclease E                                                        |
| rluC             | Pseudouridylylate synthases, 23S RNA-specific                                                                          | RBRH_02605 | Ribosomal large subunit pseudouridine synthase C                      |
| -                | Periplasmic serine proteases (ClpP class)                                                                              | RBRH_02608 | Signal peptide peptidase sppA                                         |
| -                | Predicted methyltransferases                                                                                           | RBRH_02609 | Tetrapyrrole (Corrin/Porphyrin) methylase family protein              |
| rpmF             | Ribosomal protein L32                                                                                                  | RBRH_02613 | LSU ribosomal protein L32P                                            |
| plsX             | Fatty acid/phospholipid biosynthesis enzyme                                                                            | RBRH_02614 | Fatty acid/phospholipid synthesis protein plsX                        |
| fabH1            | 3-oxoacyl-[acyl-carrier-protein] synthase III                                                                          | RBRH_02615 | 3-oxoacyl-[acyl-carrier-protein] synthase III                         |
| fabD             | (acyl-carrier-protein) S-malonyltransferase                                                                            | RBRH_02616 | Malonyl-CoA-[acyl-carrier-protein] transacylase                       |
| fabG             | Dehydrogenases with different specificities (related to short-chain alcohol dehydrogenases)                            | RBRH_02617 | 3-oxoacyl-[acyl-carrier-protein] reductase                            |
| fabF1            | 3-oxoacyl-[acyl-carrier-protein] synthase                                                                              | RBRH_02619 | 3-oxoacyl-[acyl-carrier-protein] synthase                             |

|                 |                                                                                         |            |                                                                              |
|-----------------|-----------------------------------------------------------------------------------------|------------|------------------------------------------------------------------------------|
| rhoE1           | DNA-directed RNA polymerase specialized sigma subunit, sigma24 homolog                  | RBRH_02621 | RNA polymerase sigma-E factor                                                |
| -               | Trypsin-like serine proteases, typically periplasmic, contain C-terminal PDZ domain     | RBRH_02624 | Endopeptidase degP                                                           |
| -               | Transposase and inactivated derivatives                                                 | RBRH_02476 | Transposase                                                                  |
| lepA            | Membrane GTPase LepA                                                                    | RBRH_02448 | GTP-binding protein lepA                                                     |
| spaS            | Signal peptidase I                                                                      | RBRH_02447 | Signal peptidase I                                                           |
| era             | GTPase                                                                                  | RBRH_02445 | GTP-binding protein era                                                      |
| recO            | Recombinational DNA repair protein (RecF pathway)                                       | RBRH_02444 | DNA repair protein recO                                                      |
| pdxJ            | Pyridoxal phosphate biosynthesis protein                                                | RBRH_02443 | Pyridoxal phosphate biosynthetic protein pdxJ                                |
| nagZ            | Beta-glucosidase-related glycosidases                                                   | RBRH_02441 | Anhydromuramoyl-peptide exo-beta-N-acetylglucosaminidase                     |
| efp             | Translation elongation factor P (EF-P)/translation initiation factor 5A (eIF-5A)        | RBRH_02438 | Protein Translation Elongation Factor P                                      |
| Bxe_A1094       | Uncharacterized protein conserved in bacteria                                           | RBRH_02437 | Hypothetical cytosolic protein                                               |
| uvrC            | Glutamate synthase domain 2                                                             | RBRH_02436 | Excinuclease ABC subunit C                                                   |
| pgsA            | Nuclease subunit of the excinuclease complex                                            | RBRH_02435 | CDF-diacylglycerol--glycerol-3-phosphate 3'-phosphatidylglycerol-3-phosphate |
| -               | Phosphatidylglycerophosphate synthase                                                   | RBRH_03699 | ABC transporter ATP-binding protein                                          |
| rpsF            | Ribosomal protein S6                                                                    | RBRH_03695 | SSU ribosomal protein S6P                                                    |
| -               | Primosomal replication protein N                                                        | RBRH_03694 | Primosomal replication protein N                                             |
| rpsR            | Ribosomal protein S18                                                                   | RBRH_03693 | SSU ribosomal protein S18P                                                   |
| rpII            | Ribosomal protein L9                                                                    | RBRH_03692 | LSU ribosomal protein L9P                                                    |
| dnaB            | Replicative DNA helicase                                                                | RBRH_03691 | Replicative DNA helicase                                                     |
| -               | Phosphate transport regulator (distant homolog of PhoU)                                 | RBRH_03690 | Putative pit accessory protein                                               |
| -               | Phosphate/sulphate permeases                                                            | RBRH_03689 | Low-affinity inorganic phosphate transporter                                 |
| minE            | Septum formation topological specificity factor                                         | RBRH_01023 | Cell division inhibitor MinE                                                 |
| minD            | Septum formation inhibitor-activating ATPase                                            | RBRH_01024 | Cell division inhibitor MinD                                                 |
| minC            | Septum formation inhibitor                                                              | RBRH_01025 | Cell division inhibitor MinC                                                 |
| -               | Biopolymer transport protein                                                            | RBRH_03935 | TolR protein                                                                 |
| -               | Periplasmic protein TonB, links inner and outer membranes                               | RBRH_03934 | TolQ protein                                                                 |
| BURK_023930     | Glutamate racemase                                                                      | RBRH_03932 | Bacterioferritin-associated ferredoxin                                       |
| -               | Bacterioferritin (cytochrome b1)                                                        | RBRH_03930 | Bacterioferritin                                                             |
| -               | Predicted membrane protein                                                              | RBRH_03928 | Hypothetical membrane spanning protein                                       |
| fbp1            | Fructose-1,6-bisphosphatase                                                             | RBRH_00086 | Fructose-1,6-bisphosphatase                                                  |
| -               | Putative translation initiation inhibitor, yjgF family                                  | RBRH_01369 | Translation initiation inhibitor                                             |
| hspG            | Molecular chaperone, HSP90 family                                                       | RBRH_01367 | Chaperone protein hspG                                                       |
| ubiC            | 4-hydroxybenzoate synthetase (chorismate lyase)                                         | RBRH_01366 | Chorismate--pyruvate lyase                                                   |
| -               | G:T/U mismatch-specific DNA glycosylase                                                 | RBRH_01365 | Hypothetical cytosolic protein                                               |
| -               | Spermidine synthase                                                                     | RBRH_01364 | Spermidine synthase                                                          |
| mutY            | A/G-specific DNA glycosylase                                                            | RBRH_02144 | A/G-specific adenine DNA glycosylase                                         |
| mutM            | Formamidopyrimidine-DNA glycosylase                                                     | RBRH_02145 | Formamidopyrimidine-DNA glycosylase                                          |
| -               | FOG: TPR repeat                                                                         | RBRH_02146 | Tetrapeptide repeat family protein                                           |
| ipk             | 4-diphosphocytidyl-2C-methyl-D-erythritol 2-phosphate synthase                          | RBRH_02148 | 4-diphosphocytidyl-2-C-methyl-D-erythritol kinase                            |
| prsA            | Phosphoribosylpyrophosphate synthetase                                                  | RBRH_02149 | Ribose-phosphate pyrophosphokinase                                           |
| rplY            | Ribosomal protein L25 (general stress protein Ctc)                                      | RBRH_02151 | LSU ribosomal protein L25P                                                   |
| pth1            | Peptidyl-tRNA hydrolase                                                                 | RBRH_02152 | Peptidyl-tRNA hydrolase                                                      |
| RBRH_01242      | Outer membrane protein (porin)                                                          | RBRH_01242 | Outer membrane porin protein 32 precursor                                    |
| -               | Integral membrane protein, interacts with FtsH                                          | RBRH_03737 | SecY stabilizing membrane protein                                            |
| ndk             | Nucleoside diphosphate kinase                                                           | RBRH_03736 | Nucleoside diphosphate kinase                                                |
| -               | Predicted Fe-S-cluster redox enzyme                                                     | RBRH_03735 | Radical SAM family enzyme                                                    |
| BH160DRAFT_6135 | Uncharacterized protein conserved in bacteria                                           | RBRH_03733 | Integral membrane protein                                                    |
| ispG            | Enzyme involved in the deoxyxylulose pathway of isoprenoid biosynthesis                 | RBRH_03732 | 1-hydroxy-2-methyl-2-(E)-butenyl 4-diphosphate synthase                      |
| hisS            | Histidyl-tRNA synthetase                                                                | RBRH_03731 | Histidyl-tRNA synthetase                                                     |
| BH160DRAFT_6132 | Uncharacterized protein conserved in bacteria                                           | RBRH_03730 | Hypothetical protein                                                         |
| -               | FOG: WD40-like repeat                                                                   | RBRH_03729 | PQQ enzyme repeat family protein                                             |
| engA            | Predicted GTPases                                                                       | RBRH_03728 | GTP-binding protein                                                          |
| hfq             | Uncharacterized host factor I protein                                                   | RBRH_03727 | sRNA chaperone Hfq                                                           |
| BC1003_1211     | Membrane protease subunits, stomatin/prohibitin homologs                                | RBRH_03725 | Protease activity modulator Hhk                                              |
| CARN2_3473      | Membrane protease subunits, stomatin/prohibitin homologs                                | RBRH_03724 | Protease activity modulator Hhc                                              |
| -               | Membrane protease subunits, stomatin/prohibitin homologs                                | RBRH_03722 | Histidyl-tRNA synthetase                                                     |
| purA            | ATP phosphoribosyltransferase involved in histidine biosynthesis                        | RBRH_03721 | Adenylosuccinate synthetase                                                  |
| kup2            | Adenylosuccinate synthase                                                               | RBRH_03719 | Kup system potassium uptake protein                                          |
| -               | K+ transporter                                                                          | RBRH_03718 | Transcription accessory protein (S1 RNA binding domain)                      |
| dinG            | Hypothetical protein                                                                    | RBRH_03715 | ATP-dependent helicase, DinG family                                          |
| queF            | Enzyme related to GTP cyclohydrolase I                                                  | RBRH_02109 | Queuosine biosynthesis protein QueF                                          |
| ilvA            | Threonine dehydratase                                                                   | RBRH_02108 | Threonine dehydratase                                                        |
| -               | FAD/FMN-containing dehydrogenases                                                       | RBRH_02105 | Anaerobic glycerol-3-phosphate dehydrogenase membrane anchor subunit         |
| -               | Diadenosine tetraphosphate (Ap4A) hydrolase and other HIT family hydrolases             | RBRH_02104 | HIT family hydrolase                                                         |
| ubiE            | Methylase involved in ubiquinone/menaquinone biosynthesis                               | RBRH_02102 | Ubiquinone/menaquinone biosynthesis methyltransferase ubiE                   |
| BC1002_0370     | Uncharacterized protein conserved in bacteria                                           | RBRH_02101 | Hypothetical protein                                                         |
| ligA            | Response regulator containing a CheY-like receiver domain and an HTH DNA-binding domain | RBRH_03584 | NAD-dependent DNA ligase                                                     |
| glnD            | NAD-dependent DNA ligase (contains BRCT domain type II)                                 | RBRH_03580 | protein-Pil- uridylyltransferase                                             |
| map             | UTP-GlnB (protein Pil) uridylyltransferase                                              | RBRH_03579 | Methionine aminopeptidase                                                    |
| -               | Dephospho-CoA kinase                                                                    | RBRH_00071 | CrcB family protein                                                          |
| -               | Integral membrane protein possibly involved in chromosome condensation                  | RBRH_00077 | Glutamyl-tRNA(Gln) amidotransferase subunit A                                |
| -               | Asp-tRNAAsn/Glu-tRNA(Gln) amidotransferase A subunit and related amidases               | RBRH_00011 | Transcriptional activator protein metR                                       |
| metE            | Transcriptional regulator                                                               | RBRH_00010 | 5-methyltetrahydropteroyltryptylglutamate--homocysteine methyltransferase    |
| -               | Uncharacterized protein related to capsule biosynthesis enzymes                         | RBRH_00085 | Membrane alanine aminopeptidase                                              |
| -               | Hypothetical protein                                                                    | RBRH_01726 | Membrane-bound lytic murein transglycosylase B                               |
| -               | Predicted NTPase (NACHT family)                                                         | RBRH_00082 | Integral membrane protein                                                    |
| metN            | Predicted membrane protein                                                              | RBRH_01728 | ABC transporter ATP-binding protein                                          |
| -               | ABC-type metal ion transport system, ATPase component                                   | RBRH_01729 | ABC transporter permease protein                                             |
| -               | ABC-type metal ion transport system, permease component                                 | RBRH_01730 | ABC transporter substrate-binding protein                                    |
| -               | ABC-type metal ion transport system, periplasmic component                              | RBRH_02176 | ABC transporter substrate-binding protein                                    |
| -               | ABC-type metal ion transport system, periplasmic component/surface antigen              | RBRH_01731 | Electron transfer flavoprotein beta-subunit                                  |
| -               | Electron transfer flavoprotein, beta subunit                                            | RBRH_01732 | Electron transfer flavoprotein alpha-subunit                                 |
| -               | Predicted NTPase (NACHT family)                                                         | RBRH_01736 | Radical SAM superfamily protein                                              |
| rpsP            | DNA repair photolyase                                                                   | RBRH_01739 | SSU ribosomal protein S16P                                                   |
| rimM            | Ribosomal protein S16                                                                   | RBRH_01740 | 16S rRNA processing protein rimM                                             |
| trmD            | RimM protein, required for 16S rRNA processing                                          | RBRH_01741 | tRNA (Guanine-N(1))-methyltransferase                                        |
| cobD            | Ribosomal protein L19                                                                   | RBRH_01744 | Adenosylcobinamide-phosphate synthase                                        |
| engC            | FOG: TPR repeat                                                                         | RBRH_01746 | GTPase                                                                       |

|                 |                                                                                           |            |                                                                       |
|-----------------|-------------------------------------------------------------------------------------------|------------|-----------------------------------------------------------------------|
| -               | Predicted GTPases                                                                         | RBRH_01747 | Zinc metalloprotease                                                  |
| orn             | Zn-dependent protease with chaperone function                                             | RBRH_01749 | Oligoribonuclease                                                     |
| pmbA            | Oligoribonuclease (3'->5' exoribonuclease)                                                | RBRH_01753 | Microcin-processing peptidase 1 (PmbA)                                |
| folA            | Transposase and inactivated derivatives                                                   | RBRH_01754 | Dihydrofolate reductase                                               |
| thyA            | Dihydrofolate reductase                                                                   | RBRH_01755 | Thymidylate synthase                                                  |
| lexA            | tRNA-dihydrouridine synthase                                                              | RBRH_00149 | LexA repressor                                                        |
| -               | SOS-response transcriptional repressors (RecA-mediated autopeptidases)                    | RBRH_03698 | L-asparaginase                                                        |
| rpsB            | L-asparaginase/archaeal Glu-tRNAGln amidotransferase subunit D                            | RBRH_03576 | SSU ribosomal protein S2P                                             |
| tsf             | Ribosomal protein S2                                                                      | RBRH_03574 | Protein Translation Elongation Factor Ts (EF-Ts)                      |
| pyrH            | Translation elongation factor Ts                                                          | RBRH_03573 | Uridylate kinase                                                      |
| frr             | Uridylate kinase                                                                          | RBRH_03572 | Ribosome Recycling Factor (RRF)                                       |
| uppS            | Ribosome recycling factor                                                                 | RBRH_03571 | Undecaprenyl pyrophosphate synthetase                                 |
| RBRH_03570      | Undecaprenyl pyrophosphate synthase                                                       | RBRH_03570 | Phosphatidate cytidyltransferase                                      |
| dxr             | CDP-diglyceride synthetase                                                                | RBRH_03569 | 1-deoxy-D-xylulose 5-phosphate reductoisomerase                       |
| -               | 1-deoxy-D-xylulose 5-phosphate reductoisomerase                                           | RBRH_03567 | Outer membrane protein assembly factor yaeT                           |
| -               | Outer membrane protein/protective antigen OMA87                                           | RBRH_03566 | Outer membrane protein OmpH                                           |
| lpxD            | Outer membrane protein                                                                    | RBRH_03565 | UDP-3-O-[3-hydroxymyristoyl]                                          |
| fabZ            | UDP-3-O-[3-hydroxymyristoyl] glucosamine N-acyltransferase                                | RBRH_00049 | (3R)-hydroxymyristoyl-[acyl carrier protein] dehydratase              |
| lpxA            | 3-hydroxymyristoyl/3-hydroxydecanoyl-(acyl carrier protein) dehydratases                  | RBRH_00048 | Acyl-[acyl-carrier-protein]-UDP-N-acetylglucosamine O-acyltransferase |
| lpxB            | Acyl-[acyl carrier protein]-UDP-N-acetylglucosamine O-acyltransferase                     | RBRH_00047 | Lipid-A-disaccharide synthase                                         |
| mhbB            | Lipid A disaccharide synthetase                                                           | RBRH_00046 | Ribonuclease HII                                                      |
| BTH_12042       | Ribonuclease HII                                                                          | RBRH_00045 | 23S rRNA methyltransferase                                            |
| -               | Uncharacterized conserved protein                                                         | RBRH_00044 | ATP/GTP-binding protein                                               |
| ppsA            | Uncharacterized protein conserved in bacteria                                             | RBRH_00043 | Phosphoenolpyruvate synthase                                          |
| BDAG_01288      | Phosphoenolpyruvate synthase/pyruvate phosphate dikinase                                  | RBRH_00042 | Hypothetical protein                                                  |
| smgB            | Histone acetyltransferase HPA2 and related acetyltransferases                             | RBRH_02709 | SsrA-binding protein                                                  |
| WQE_31521       | Oligoketide cyclase/lipid transport protein                                               | RBRH_02708 | Hypothetical cytosolic protein                                        |
| guaB            | Uncharacterized protein conserved in bacteria                                             | RBRH_02707 | Inosine-5'-monophosphate dehydrogenase                                |
| guaA            | IMP dehydrogenase/GMP reductase                                                           | RBRH_02704 | GMP synthase [glutamine-hydrolyzing                                   |
| tnpA            | Predicted NTPase (NACHT family)                                                           | RBRH_02021 | Transposase                                                           |
| -               | Transposase and inactivated derivatives                                                   | RBRH_02020 | Transposase                                                           |
| rep             | Predicted NTPase (NACHT family)                                                           | RBRH_00848 | ATP-dependent DNA helicase rep                                        |
| A33K_12849      | Superfamily I DNA and RNA helicases                                                       | RBRH_00849 | Cytochrome c555                                                       |
| -               | Hypothetical protein                                                                      | RBRH_02803 | Potassium-transporting ATPase A chain                                 |
| -               | Osmosensitive K+ channel histidine kinase                                                 | RBRH_02495 | Two-component response regulator kdpE                                 |
| mfd             | Hypothetical protein                                                                      | RBRH_03399 | Transcription-repair coupling factor                                  |
| ispD            | Transcription-repair coupling factor (superfamily II helicase)                            | RBRH_03400 | 2-C-methyl-D-erythritol 4-phosphate cytidyltransferase                |
| ispF            | 4-diphosphocytidyl-2-methyl-D-erythritol synthase                                         | RBRH_03401 | 2-C-methyl-D-erythritol 2,4-cyclodiphosphate synthase                 |
| -               | Superfamily II RNA helicase                                                               | RBRH_03625 | GTP-binding protein TypA/BipA                                         |
| rhlE2           | Predicted membrane GTPase involved in stress response                                     | RBRH_02465 | ATP-dependent RNA helicase                                            |
| -               | Superfamily II DNA and RNA helicases                                                      | RBRH_02467 | Rhodanese-related sulfurtransferases                                  |
| RPS107_mpl112   | 3-methyladenine DNA glycosylase                                                           | RBRH_00100 | Hemagglutinin-like protein                                            |
| -               | Glucose-6-phosphate isomerase                                                             | RBRH_02020 | Transposase                                                           |
| -               | Transposase and inactivated derivatives                                                   | RBRH_02021 | Transposase                                                           |
| dnaE            | Transposase and inactivated derivatives                                                   | RBRH_02469 | DNA polymerase III alpha subunit                                      |
| msbA            | Lipid A core - O-antigen ligase and related enzymes                                       | RBRH_02470 | Phospholipid-lipopolysaccharide ABC transporter                       |
| cafA            | ABC-type multidrug transport system, ATPase and permease components                       | RBRH_02481 | Ribonuclease G                                                        |
| -               | Ribonucleases G and E                                                                     | RBRH_02484 | iojap protein family                                                  |
| nadD            | Uncharacterized homolog of plant iojap protein                                            | RBRH_02485 | Nicotinate-nucleotide adenylyltransferase                             |
| hemF            | Nicotinic acid mononucleotide adenylyltransferase                                         | RBRH_02486 | Coproporphyrinogen III oxidase                                        |
| purD            | Coproporphyrinogen III oxidase                                                            | RBRH_02487 | Phosphoribosylamine-glycine ligase                                    |
| -               | Phosphoribosylamine-glycine ligase                                                        | RBRH_02488 | Hypothetical cytosolic protein                                        |
| -               | Uncharacterized conserved protein                                                         | RBRH_03644 | Ribosomal large subunit pseudouridine synthase B                      |
| BURK_000910     | Predicted transcriptional regulator containing the HTH domain                             | RBRH_01550 | Peptidoglycan-specific endopeptidase, M23 family                      |
| -               | Hypothetical protein                                                                      | RBRH_00852 | Transcriptional regulator                                             |
| SG0735          | Uracil-DNA glycosylase                                                                    | RBRH_03599 | Hypothetical cytosolic protein                                        |
| -               | DNA polymerase III, gamma/tau subunits                                                    | RBRH_03748 | Hypothetical transcriptional regulatory protein                       |
| recR            | Uncharacterized protein conserved in bacteria                                             | RBRH_03747 | Recombination protein recR                                            |
| iscX            | Recombinational DNA repair protein (RecF pathway)                                         | RBRH_03832 | Hypothetical cytosolic protein                                        |
| -               | Hypothetical protein                                                                      | RBRH_01057 | DNA helicase II                                                       |
| Bcep18194_A3475 | Superfamily I DNA and RNA helicases                                                       | RBRH_02341 | Periplasmic divalent cation tolerance protein CutA                    |
| thrB            | Hypothetical protein                                                                      | RBRH_01055 | Homoserine kinase                                                     |
| -               | Putative homoserine kinase type II (protein kinase fold)                                  | RBRH_01052 | AMP nucleosidase                                                      |
| -               | Nucleoside phosphorylase                                                                  | RBRH_01170 | 3-isopropylmalate dehydrogenase                                       |
| polA            | Predicted Rossmann fold nucleotide-binding protein                                        | RBRH_01169 | DNA polymerase I                                                      |
| -               | DNA-directed RNA polymerase, beta subunit/140 kD subunit                                  | RBRH_01168 | NADH dehydrogenase                                                    |
| RSp1073         | Thymidylate kinase                                                                        | RBRH_00100 | Hemagglutinin-like protein                                            |
| -               | Rhodanese-related sulfurtransferase                                                       | RBRH_01165 | ALCE                                                                  |
| -               | ABC-type spermidine/putrescine transport systems, ATPase components                       | RBRH_03381 | Transposase                                                           |
| thiE            | Transaldolase                                                                             | RBRH_02305 | Thiamin-phosphate pyrophosphorylase                                   |
| thiG            | Thiamine monophosphate synthase                                                           | RBRH_02306 | Thiazole biosynthesis protein thiG                                    |
| Bphyt_3574      | Uncharacterized enzyme of thiazole biosynthesis                                           | RBRH_02307 | ThiS protein                                                          |
| -               | Sulfur transfer protein involved in thiamine biosynthesis                                 | RBRH_02308 | Glycine oxidase                                                       |
| ispA            | Exonuclease VII small subunit                                                             | RBRH_01162 | Dimethylallyltransferase/Geranyltransferase                           |
| dxs             | Geranylgeranyl pyrophosphate synthase                                                     | RBRH_01161 | 1-deoxy-D-xylulose 5-phosphate synthase                               |
| -               | Deoxyxylulose-5-phosphate synthase                                                        | RBRH_01160 | Hypothetical cytosolic protein                                        |
| gcp             | Uncharacterized conserved protein                                                         | RBRH_01159 | O-sialoglycoprotein endopeptidase                                     |
| rpsU            | Uncharacterized conserved protein                                                         | RBRH_01156 | SSU ribosomal protein S21P                                            |
| -               | Ribosomal protein S21                                                                     | RBRH_01155 | GatB/Yqey domain protein                                              |
| dnaG            | Uncharacterized conserved protein                                                         | RBRH_01154 | DNA primase                                                           |
| rpoD            | DNA primase (bacterial type)                                                              | RBRH_01153 | RNA polymerase sigma factor rpoD                                      |
| -               | Predicted aminomethyltransferase related to GcvT                                          | RBRH_01584 | Hypothetical exported protein                                         |
| tmk             | Predicted periplasmic solute-binding protein                                              | RBRH_01583 | Thymidylate kinase                                                    |
| holB            | Thymidylate kinase                                                                        | RBRH_01582 | DNA polymerase III, delta' subunit                                    |
| -               | Sortase and related acyltransferases                                                      | RBRH_01580 | DNase, TatD family                                                    |
| GWL_35760       | Hypothetical protein                                                                      | RBRH_02184 | Hypothetical protein                                                  |
| istB            | Membrane protein involved in the export of O-antigen and teichoic acid                    | RBRH_03978 | Transposase                                                           |
| -               | Autotransporter adhesin                                                                   | RBRH_03585 | Cell division protein zipA                                            |
| -               | Hypothetical protein                                                                      | RBRH_03586 | Chromosome partition protein smc                                      |
| dapC            | Permeases of the drug/metabolite transporter (DMT) superfamily                            | RBRH_03588 | N-Succinyl-L,L-DAP Aminotransferase                                   |
| dapD            | Aspartate/tyrosine/aromatic aminotransferase                                              | RBRH_03589 | 2,3,4,5-tetrahydropyridine-2-carboxylate N-succinyltransferase        |
| -               | Tetrahydropicolinate N-succinyltransferase                                                | RBRH_03590 | Arsenate reductase                                                    |
| dapE            | Arsenate reductase and related proteins, glutaredoxin family                              | RBRH_03591 | Succinyl-diaminopimelate desuccinylase                                |
| cls             | Methylase of polypeptide chain release factors                                            | RBRH_03593 | Cardiolipin synthetase                                                |
| -               | Phosphatidylserine/phosphatidylglycerophosphate/cardiolipin synthases and related enzymes | RBRH_03597 | ABC transporter ATP-binding protein                                   |

|                  |                                                                                                                                                                |            |                                                                                              |
|------------------|----------------------------------------------------------------------------------------------------------------------------------------------------------------|------------|----------------------------------------------------------------------------------------------|
| RBRH_02472       | Uncharacterized protein conserved in bacteria                                                                                                                  | RBRH_02472 | Unnamed protein product                                                                      |
| RBRH_02471       | ATPases involved in chromosome partitioning                                                                                                                    | RBRH_02471 | Unnamed protein product                                                                      |
| -                | Transposase and inactivated derivatives                                                                                                                        | RBRH_01599 | Hypothetical cytosolic protein                                                               |
| lysC             | Integrase                                                                                                                                                      | RBRH_03956 | Aspartokinase                                                                                |
| CAGGBEG34_30027  | Thioesterase domains of type I polyketide synthases or non-ribosomal peptide synthetases                                                                       | RBRH_02120 | Reverse transcriptase                                                                        |
| -                | Retron-type reverse transcriptase                                                                                                                              | RBRH_02476 | Transposase                                                                                  |
| tilS             | Transposase and inactivated derivatives                                                                                                                        | RBRH_03957 | tRNA(Ile)-lysine synthetase TilS                                                             |
| accA             | Predicted ATPase of the PP-loop superfamily implicated in cell cycle control                                                                                   | RBRH_03958 | Acetyl-coenzyme A carboxylase carboxyl transferase subunit alpha                             |
| cysS             | 3-methyladenine DNA glycosylase/8-oxoguanine DNA glycosylase                                                                                                   | RBRH_03960 | CysteinyI-tRNA synthetase                                                                    |
| ppiB             | FOG: TPR repeat                                                                                                                                                | RBRH_03963 | Peptidyl-prolyl cis-trans isomerase                                                          |
| -                | Peptidyl-prolyl cis-trans isomerase (rotamase) - cyclophilin family                                                                                            | RBRH_03964 | UDP-2,3-diacetylglucosamine hydrolase                                                        |
| -                | L-alanine-DL-glutamate epimerase and related enzymes of enolase superfamily                                                                                    | RBRH_00092 | Transposase                                                                                  |
| -                | Predicted NTPase (NACHT family)                                                                                                                                | RBRH_03966 | RRNA methylase, SpoU family                                                                  |
| suhB             | rRNA methylase                                                                                                                                                 | RBRH_03967 | Myo-inositol-1(or 4)-monophosphatase                                                         |
| -                | Phosphoglycerol transferase and related proteins, alkaline phosphatase superfamily                                                                             | RBRH_03620 | ATPase                                                                                       |
| -                | Predicted ATPase                                                                                                                                               | RBRH_03621 | Dihydroliipoamide dehydrogenase                                                              |
| sucB             | Pyruvate/2-oxoglutarate dehydrogenase complex, dihydroliipoamide dehydrogenase (E3) component, and related enzymes                                             | RBRH_03623 | Dihydroliipoamide succinyltransferase component (E2) of 2-oxoglutarate dehydrogenase complex |
| sucA             | Pyruvate/2-oxoglutarate dehydrogenase complex, dihydroliipoamide acyltransferase (E2) component, and related enzymes                                           | RBRH_03624 | 2-oxoglutarate dehydrogenase E1 component                                                    |
| fdx-1            | 2-oxoglutarate dehydrogenase complex, dehydrogenase (E1) component, and related enzymes                                                                        | RBRH_03831 | Ferredoxin, 2Fe-2s                                                                           |
| hscA             | Ferredoxin                                                                                                                                                     | RBRH_03830 | Chaperone protein hscA                                                                       |
| hscB             | Molecular chaperone                                                                                                                                            | RBRH_03829 | Chaperone protein hscB                                                                       |
| -                | DnaJ-domain-containing proteins 1                                                                                                                              | RBRH_03828 | Iron-sulphur cluster assembly protein IscA                                                   |
| -                | Uncharacterized conserved protein                                                                                                                              | RBRH_03827 | IscU protein                                                                                 |
| iscS             | NiU homolog involved in Fe-S cluster formation                                                                                                                 | RBRH_03826 | Cysteine desulfurase                                                                         |
| -                | Cysteine sulfinate desulfinate/cysteine desulfurase and related enzymes                                                                                        | RBRH_03825 | Rrt2 family protein                                                                          |
| bglu_1g19220     | Predicted transcriptional regulator                                                                                                                            | RBRH_00954 | Multidrug resistance protein B                                                               |
| bglu_1g19220     | Predicted transcriptional regulator                                                                                                                            | RBRH_03409 | Multidrug resistance protein B                                                               |
| BgramDRAFT_5853  | Permeases of the major facilitator superfamily                                                                                                                 | RBRH_02952 | Ribonuclease BN                                                                              |
| -                | Uncharacterized protein related to capsule biosynthesis enzymes                                                                                                | RBRH_00984 | Putative periplasmic protein                                                                 |
| -                | Uncharacterized protein conserved in bacteria                                                                                                                  | RBRH_00983 | Putative periplasmic protein                                                                 |
| -                | Uncharacterized protein conserved in bacteria                                                                                                                  | RBRH_00982 | Hypothetical exported protein                                                                |
| leuA             | Predicted NTPase (NACHT family)                                                                                                                                | RBRH_02514 | 2-isopropylmalate synthase                                                                   |
| pssA             | Isopropylmalate/homocitrate/citramalate synthases                                                                                                              | RBRH_02513 | CDP-diacetylgllycerol--serine O-phosphatidyltransferase                                      |
| psd              | Phosphatidylserine synthase                                                                                                                                    | RBRH_02512 | Phosphatidylserine decarboxylase                                                             |
| ilvC             | Phosphatidylserine decarboxylase                                                                                                                               | RBRH_02511 | Ketol-acid reductoisomerase                                                                  |
| ilvH             | Ketol-acid reductoisomerase                                                                                                                                    | RBRH_02510 | Acetolactate synthase small subunit                                                          |
| ilvB             | Acetolactate synthase, small (regulatory) subunit                                                                                                              | RBRH_02508 | Acetolactate synthase large subunit                                                          |
| -                | Thiamine pyrophosphate-requiring enzymes [acetolactate synthase, pyruvate dehydrogenase (cytochrome), glyoxylate carboligase, phosphonopyruvate decarboxylase] | RBRH_02506 | Specialized sigma subunits of RNA polymerase                                                 |
| Bphy_2024        | DNA-directed RNA polymerase specialized sigma subunit, sigma24 homolog                                                                                         | RBRH_02505 | Unnamed protein product                                                                      |
| -                | Hypothetical protein                                                                                                                                           | RBRH_02500 | Transcriptional regulator, TetR family                                                       |
| BUPH_00305       | Transcriptional regulator                                                                                                                                      | RBRH_01384 | Hypothetical protein                                                                         |
| -                | Uncharacterized conserved protein                                                                                                                              | RBRH_02883 | Pirin                                                                                        |
| RBRH_01044       | Pirin-related protein                                                                                                                                          | RBRH_01044 | HemY protein                                                                                 |
| SG0735           | Porphobilinogen deaminase                                                                                                                                      | RBRH_03599 | Hypothetical cytosolic protein                                                               |
| argH             | Uncharacterized conserved protein                                                                                                                              | RBRH_00570 | Citrate/L-malate proton symporter                                                            |
| ldcC             | Argininosuccinate lyase                                                                                                                                        | RBRH_03122 | Biodegradative arginine decarboxylase                                                        |
| dcd              | Arginine/lysine/ornithine decarboxylases                                                                                                                       | RBRH_03123 | Deoxycytidine triphosphate deaminase                                                         |
| -                | Predicted NTPase (NACHT family)                                                                                                                                | RBRH_03778 | Multidrug resistance ABC transporter ATP-binding and permease protein                        |
| RBRH_00037       | ABC-type transport system involved in Fe-S cluster assembly, permease and ATPase components                                                                    | RBRH_00037 | Unnamed protein product                                                                      |
| RBRH_00037       | ABC-type transport system involved in Fe-S cluster assembly, permease and ATPase components                                                                    | RBRH_03777 | Unnamed protein product                                                                      |
| RBRH_03890       | Hypothetical protein                                                                                                                                           | RBRH_03890 | Unnamed protein product                                                                      |
| -                | Hypothetical protein                                                                                                                                           | RBRH_03890 | Unnamed protein product                                                                      |
| CAGGBEG34_550003 | Nitrate reductase beta subunit                                                                                                                                 | RBRH_03124 | Superoxide dismutase [Cu-Zn]                                                                 |
| mrp              | Cu/Zn superoxide dismutase                                                                                                                                     | RBRH_03125 | Iron-sulfur cluster assembly/repair protein ApbC                                             |
| -                | ATPases involved in chromosome partitioning                                                                                                                    | RBRH_03126 | OmpA family protein                                                                          |
| metG             | Hypothetical protein                                                                                                                                           | RBRH_03128 | Methionyl-tRNA synthetase                                                                    |
| Bphyt_1014       | Methionyl-tRNA synthetase                                                                                                                                      | RBRH_03129 | Hypothetical Outer Membrane Protein                                                          |
| -                | Uncharacterized protein conserved in bacteria                                                                                                                  | RBRH_03130 | Outer membrane protein                                                                       |
| -                | Outer membrane protein                                                                                                                                         | RBRH_03131 | Hypothetical protein                                                                         |
| -                | Hypothetical protein                                                                                                                                           | RBRH_03132 | Segregation and condensation protein Sep                                                     |
| panC             | Uncharacterized conserved protein                                                                                                                              | RBRH_03133 | Pantoate--beta-alanine ligase                                                                |
| panD             | Panthothenate synthetase                                                                                                                                       | RBRH_03134 | Aspartate 1-decarboxylase                                                                    |
| K788_8069        | Aspartate 1-decarboxylase                                                                                                                                      | RBRH_03137 | Cobalamin-binding protein                                                                    |
| -                | Large exoproteins involved in heme utilization or adhesion                                                                                                     | RBRH_03381 | Transposase                                                                                  |
| aroC             | Large exoproteins involved in heme utilization or adhesion                                                                                                     | RBRH_02955 | Chorismate synthase                                                                          |
| -                | Chorismate synthase                                                                                                                                            | RBRH_02954 | CBS domain containing protein                                                                |
| pdhD             | FOG: CBS domain                                                                                                                                                | RBRH_03818 | Dihydroliipoamide dehydrogenase                                                              |
| aceE             | Pyruvate/2-oxoglutarate dehydrogenase complex, dihydroliipoamide acyltransferase (E2) component, and related enzymes                                           | RBRH_03816 | Pyruvate dehydrogenase E1 component                                                          |
| folD             | Pyruvate dehydrogenase complex, dehydrogenase (E1) component                                                                                                   | RBRH_03810 | Methylenetetrahydrofolate dehydrogenase (NADP+)                                              |
| prlC             | 5,10-methylene-tetrahydrofolate dehydrogenase/Methenyl tetrahydrofolate cyclohydrolase                                                                         | RBRH_03809 | Oligopeptidase A                                                                             |
| -                | ABC-type branched-chain amino acid transport systems, periplasmic component                                                                                    | RBRH_03629 | Multidrug resistance protein A                                                               |
| mutS             | Uncharacterized conserved small protein                                                                                                                        | RBRH_03971 | DNA mismatch repair protein mutS                                                             |
| slyD             | Mismatch repair ATPase (MutS family)                                                                                                                           | RBRH_03973 | Peptidyl-prolyl cis-trans isomerase                                                          |
| dapA             | Uncharacterized lipoprotein                                                                                                                                    | RBRH_03860 | Dihydrodipicolinate synthase                                                                 |
| trpS             | Dihydrodipicolinate synthase/N-acetylneuraminate lyase                                                                                                         | RBRH_03858 | Tryptophanyl-tRNA synthetase                                                                 |
| -                | Tryptophanyl-tRNA synthetase                                                                                                                                   | RBRH_03857 | Membrane endopeptidase, M50 family                                                           |
| -                | Zn-dependent proteases                                                                                                                                         | RBRH_03855 | PHP domain containing protein (TRPH)                                                         |
| -                | Large-conductance mechanosensitive channel                                                                                                                     | RBRH_03820 | D-alanyl-D-alanine-endopeptidase                                                             |
| tnpA2            | Transposase and inactivated derivatives                                                                                                                        | RBRH_00904 | Tnp                                                                                          |
| tnpA2            | Transposase and inactivated derivatives                                                                                                                        | RBRH_03165 | Tnp                                                                                          |
| -                | Hypothetical protein                                                                                                                                           | RBRH_02476 | Transposase                                                                                  |
| gltX             | DNA replication protein                                                                                                                                        | RBRH_02893 | Glutamyl-tRNA synthetase                                                                     |
| -                | ABC-type Fe3+ transport system, periplasmic component                                                                                                          | RBRH_02891 | NlpC/P60 family protein                                                                      |

|                  |                                                                                        |            |                                                                                                   |
|------------------|----------------------------------------------------------------------------------------|------------|---------------------------------------------------------------------------------------------------|
| -                | Cell wall-associated hydrolases (invasion-associated proteins)                         | RBRH_02890 | Oligopeptide transport ATP-binding protein oppD / Oligopeptide transport ATP-binding protein oppF |
| -                | ABC-type uncharacterized transport system, duplicated ATPase component                 | RBRH_02889 | Oligopeptide transport system permease protein oppC                                               |
| -                | ABC-type uncharacterized transport system, permease component                          | RBRH_02888 | Oligopeptide transport system permease protein oppB                                               |
| -                | ABC-type uncharacterized transport system, permease component                          | RBRH_02887 | Oligopeptide-binding protein oppA                                                                 |
| fabI             | ABC-type oligopeptide transport system, periplasmic component                          | RBRH_02885 | Enoyl-[acyl-carrier protein] reductase (NADH)                                                     |
| -                | Predicted NTPase (NACHT family)                                                        | RBRH_03797 | Sulfide dehydrogenase precursor                                                                   |
| glnA1            | Rhodanese-related sulfurtransferase                                                    | RBRH_03799 | Glutamine synthetase                                                                              |
| XSR1_50074       | Tellurite resistance protein and related permeases                                     | RBRH_02910 | Unnamed protein product                                                                           |
| XSR1_50074       | Tellurite resistance protein and related permeases                                     | RBRH_00122 | Unnamed protein product                                                                           |
| XSR1_50074       | Tellurite resistance protein and related permeases                                     | RBRH_02048 | Putative phage tail protein                                                                       |
| -                | Hypothetical protein                                                                   | RBRH_03381 | Transposase                                                                                       |
| -                | Transposase and inactivated derivatives, IS5 family                                    | RBRH_01603 | BolA protein                                                                                      |
| -                | Stress-induced morphogen (activity unknown)                                            | RBRH_01602 | Intracellular septation protein                                                                   |
| -                | Intracellular septation protein A                                                      | RBRH_01601 | Peptide methionine sulfoxide reductase msrB                                                       |
| purl             | Conserved domain frequently associated with peptide methionine sulfoxide reductase     | RBRH_01605 | Phosphoribosylformylglycinamide synthase                                                          |
| pgi              | Leucine-rich repeat (LRR) protein                                                      | RBRH_01609 | Glucose-6-phosphate isomerase                                                                     |
| RBRH_01614       | Preprotein translocase subunit SecA (ATPase, RNA helicase)                             | RBRH_01614 | Peptidyl-prolyl cis-trans isomerase                                                               |
| lon              | Parvulin-like peptidyl-prolyl isomerase                                                | RBRH_01622 | ATP-dependent endopeptidase Lon                                                                   |
| clpX             | ATP-dependent Lon protease, bacterial type                                             | RBRH_01623 | ATP-dependent endopeptidase clp ATP-binding subunit clpX                                          |
| clpP             | ATP-dependent protease Clp, ATPase subunit                                             | RBRH_01624 | ATP-dependent endopeptidase clp proteolytic subunit clpP                                          |
| tig              | Protease subunit of ATP-dependent Clp proteases                                        | RBRH_01625 | Trigger factor, ppiase                                                                            |
| trxA             | Cytotoxic translational repressor of toxin-antitoxin stability system                  | RBRH_03750 | Thioredoxin                                                                                       |
| rho              | Thiol-disulfide isomerase and thioredoxins                                             | RBRH_03753 | Transcription termination factor rho                                                              |
| -                | Ribosomal protein L31                                                                  | RBRH_03758 | Hypothetical protein                                                                              |
| int              | Permeases of the major facilitator superfamily                                         | RBRH_01051 | Unnamed protein product                                                                           |
| CAGGBEG34_610004 | Na <sup>+</sup> /citrate symporter                                                     | RBRH_01048 | Unnamed protein product                                                                           |
| -                | Predicted NAD/FAD-binding protein                                                      | RBRH_01213 | large terminase subunit                                                                           |
| XFEB_01759       | Uncharacterized protein conserved in bacteria                                          | RBRH_01211 | Unnamed protein product                                                                           |
| L682_09905       | Hypothetical protein                                                                   | RBRH_01202 | Unnamed protein product                                                                           |
| BC1002_6556      | Hypothetical protein                                                                   | RBRH_01199 | Unnamed protein product                                                                           |
| HIB_15810        | Hypothetical protein                                                                   | RBRH_01196 | Unnamed protein product                                                                           |
| L682_09945       | Hypothetical protein                                                                   | RBRH_01195 | phage-related protein                                                                             |
| L682_09955       | Hypothetical protein                                                                   | RBRH_01193 | Unnamed protein product                                                                           |
| -                | Hypothetical protein                                                                   | RBRH_01189 | Lysozyme                                                                                          |
| -                | Hypothetical protein                                                                   | RBRH_01186 | Lysozyme                                                                                          |
| CAGGBEG34_220024 | Hypothetical protein                                                                   | RBRH_01185 | Holin                                                                                             |
| relA             | Predicted permeases                                                                    | RBRH_02966 | GTP pyrophosphokinase                                                                             |
| etf              | Guanosine polyphosphate pyrophosphohydrolases/synthetases                              | RBRH_02956 | Electron transfer flavoprotein-ubiquinone oxidoreductase                                          |
| -                | Dehydrogenases (flavoproteins)                                                         | RBRH_03138 | Transporter                                                                                       |
| -                | ABC-type cobalamin/Fe <sup>3+</sup> -siderophores transport systems, ATPase components | RBRH_03139 | Transporter                                                                                       |
| BURK_025795      | ABC-type Fe <sup>3+</sup> -siderophore transport system, permease component            | RBRH_03140 | Vitamin B12 receptor                                                                              |
| BYI23_A005940    | Outer membrane cobalamin receptor protein                                              | RBRH_03141 | Unnamed protein product                                                                           |
| -                | Hypothetical protein                                                                   | RBRH_03142 | Hypothetical protein                                                                              |
| lgt              | Hypothetical protein                                                                   | RBRH_03145 | Proteoliprotein diacylglycerol transferase                                                        |
| hoIC             | Dihydroxyacid dehydratase/phosphogluconate dehydratase                                 | RBRH_03149 | DNA polymerase III, chi subunit                                                                   |
| pepA             | DNA polymerase III, chi subunit                                                        | RBRH_03150 | Cytosol aminopeptidase                                                                            |
| -                | Leucyl aminopeptidase                                                                  | RBRH_03151 | Hypothetical membrane spanning protein                                                            |
| -                | Predicted permeases                                                                    | RBRH_03152 | Hypothetical membrane spanning protein                                                            |
| Bpht_0969        | Uncharacterized conserved protein                                                      | RBRH_03160 | Cys regulon transcriptional activator                                                             |
| Bpht_0969        | Uncharacterized conserved protein                                                      | RBRH_00145 | Transcriptional regulator cbl                                                                     |
| -                | Predicted transcriptional regulators                                                   | RBRH_03055 | Hydroxyacylglutathione hydrolase                                                                  |
| ldcA             | Guanosine polyphosphate pyrophosphohydrolases/synthetases                              | RBRH_03904 | Muramoyltetrapeptide carboxypeptidase                                                             |
| -                | Uncharacterized proteins, homologs of microcin C7 resistance protein MccF              | RBRH_03905 | tRNA-specific adenosine deaminase                                                                 |
| -                | Transposase and inactivated derivatives                                                | RBRH_02476 | Transposase                                                                                       |
| -                | Transposase and inactivated derivatives                                                | RBRH_03980 | Transposase                                                                                       |
| -                | Peroxiredoxin                                                                          | RBRH_03402 | smolarity sensor protein envZ                                                                     |
| ompR             | Signal transduction histidine kinase                                                   | RBRH_03403 | Transcriptional regulatory protein ompR                                                           |
| rbfA             | Pseudouridine synthase                                                                 | RBRH_03638 | Ribosome-binding factor A                                                                         |
| nusA             | Translation initiation factor 2 (IF-2; GTPase)                                         | RBRH_03642 | N utilization substance protein A                                                                 |
| BUPH_06600       | Transcriptional regulator                                                              | RBRH_03701 | Unnamed protein product                                                                           |
| -                | Anaerobic dehydrogenases, typically selenocysteine-containing                          | RBRH_03703 | Phosphoserine phosphatase                                                                         |
| metC             | Phosphoserine phosphatase                                                              | RBRH_03704 | Cystathionine beta-lyase                                                                          |
| rimO             | Cystathionine beta-lyases/cystathionine gamma-synthases                                | RBRH_03707 | tRNA 2-methylthioadenosine synthase homolog                                                       |
| mnr              | 2-methylthioadenosine synthetase                                                       | RBRH_03602 | Ribonuclease R                                                                                    |
| rlmB             | Exoribonuclease R                                                                      | RBRH_03601 | 23S rRNA Gm2251 methyltransferase                                                                 |
| rpiA             | rRNA methylases                                                                        | RBRH_03598 | Ribose 5-phosphate isomerase                                                                      |
| -                | Ribose 5-phosphate isomerase                                                           | RBRH_03714 | Lipoprotein, ComL family                                                                          |
| -                | DNA uptake lipoprotein                                                                 | RBRH_03713 | Ribosomal large subunit pseudouridine synthase D                                                  |
| BgramDRAFT_2322  | Pseudouridylyl synthases, 23S RNA-specific                                             | RBRH_03712 | Hypothetical cytosolic protein                                                                    |
| -                | Uncharacterized conserved protein                                                      | RBRH_03708 | Methyl-accepting chemotaxis protein                                                               |
| -                | Hypothetical protein                                                                   | RBRH_01051 | Unnamed protein product                                                                           |
| RBRH_04010       | Transcriptional regulator                                                              | RBRH_04010 | Phage protein                                                                                     |
| RBRH_01048       | Hypothetical protein                                                                   | RBRH_01048 | Unnamed protein product                                                                           |
| QWA_03220        | Zn-dependent protease with chaperone function                                          | RBRH_01047 | Unnamed protein product                                                                           |
| AcdelDRAFT_0859  | Predicted transcriptional regulator                                                    | RBRH_01226 | Regulatory protein CRO (antirepressor)                                                            |
| -                | Uncharacterized protein conserved in bacteria                                          | RBRH_03772 | Hypothetical cytosolic protein                                                                    |
| -                | Acetyl-CoA carboxylase, carboxyltransferase component (subunits alpha and beta)        | RBRH_01213 | Large terminase subunit                                                                           |
| BC1002_6544      | Uncharacterized protein conserved in bacteria                                          | RBRH_01211 | Unnamed protein product                                                                           |
| L682_09905       | Hypothetical protein                                                                   | RBRH_01202 | Unnamed protein product                                                                           |
| BC1002_6556      | Hypothetical protein                                                                   | RBRH_01199 | Unnamed protein product                                                                           |
| HIB_15810        | Hypothetical protein                                                                   | RBRH_01196 | Unnamed protein product                                                                           |
| L682_09945       | Hypothetical protein                                                                   | RBRH_01195 | phage-related protein                                                                             |
| L682_09955       | Hypothetical protein                                                                   | RBRH_01193 | Unnamed protein product                                                                           |
| -                | Hypothetical protein                                                                   | RBRH_01189 | Lysozyme                                                                                          |
| -                | Hypothetical protein                                                                   | RBRH_01186 | Lysozyme                                                                                          |
| CAGGBEG34_220024 | Hypothetical protein                                                                   | RBRH_01185 | Holin                                                                                             |
| -                | Predicted NTPase (NACHT family)                                                        | RBRH_01051 | Unnamed protein product                                                                           |
| tnpA2            | Na <sup>+</sup> /citrate symporter                                                     | RBRH_00904 | Tnp                                                                                               |
| tnpA2            | Na <sup>+</sup> /citrate symporter                                                     | RBRH_03165 | Tnp                                                                                               |
| CAGGBEG34_610004 | Na <sup>+</sup> /citrate symporter                                                     | RBRH_01048 | Unnamed protein product                                                                           |
| -                | Hypothetical protein                                                                   | RBRH_01213 | large terminase subunit                                                                           |
| XFEB_01759       | Uncharacterized protein conserved in bacteria                                          | RBRH_01211 | Unnamed protein product                                                                           |



|                  |                                                                                                                          |            |                                                          |
|------------------|--------------------------------------------------------------------------------------------------------------------------|------------|----------------------------------------------------------|
| L682_09905       | Hypothetical protein                                                                                                     | RBRH_01202 | Unnamed protein product                                  |
| BC1002_6556      | Hypothetical protein                                                                                                     | RBRH_01199 | Unnamed protein product                                  |
| HMPREF9095_1680  | Hypothetical protein                                                                                                     | RBRH_01196 | Unnamed protein product                                  |
| L682_09945       | Hypothetical protein                                                                                                     | RBRH_01195 | phage-related protein                                    |
| L682_09955       | Hypothetical protein                                                                                                     | RBRH_01193 | Unnamed protein product                                  |
| -                | Hypothetical protein                                                                                                     | RBRH_01189 | Lysozyme                                                 |
| -                | Hypothetical protein                                                                                                     | RBRH_01186 | Lysozyme                                                 |
| CAGGBEG34_220024 | Hypothetical protein                                                                                                     | RBRH_01185 | Holin                                                    |
| -                | Predicted GTPases                                                                                                        | RBRH_01051 | Unnamed protein product                                  |
| CAGGBEG34_610004 | Na <sup>+</sup> /citrate symporter                                                                                       | RBRH_01048 | Unnamed protein product                                  |
| -                | Zn-dependent protease with chaperone function                                                                            | RBRH_01213 | large terminase subunit                                  |
| -                | Uncharacterized protein conserved in bacteria                                                                            | RBRH_03766 | Virulence-associated protein C                           |
| BC1002_6544      | Uncharacterized protein conserved in bacteria                                                                            | RBRH_01211 | Unnamed protein product                                  |
| L682_09905       | Hypothetical protein                                                                                                     | RBRH_01202 | Unnamed protein product                                  |
| BC1002_6556      | Hypothetical protein                                                                                                     | RBRH_01199 | Unnamed protein product                                  |
| HMPREF9095_1680  | Hypothetical protein                                                                                                     | RBRH_01196 | Unnamed protein product                                  |
| L682_09945       | Hypothetical protein                                                                                                     | RBRH_01195 | phage-related protein                                    |
| L682_09955       | Hypothetical protein                                                                                                     | RBRH_01193 | Unnamed protein product                                  |
| -                | Hypothetical protein                                                                                                     | RBRH_01189 | Lysozyme                                                 |
| -                | Hypothetical protein                                                                                                     | RBRH_01186 | Lysozyme                                                 |
| BC1002_6570      | Hypothetical protein                                                                                                     | RBRH_01185 | Holin                                                    |
| -                | Predicted NTPase (NACHT family)                                                                                          | RBRH_01051 | Unnamed protein product                                  |
| CAGGBEG34_610004 | Na <sup>+</sup> /citrate symporter                                                                                       | RBRH_01048 | Unnamed protein product                                  |
| -                | ATPase components of ABC transporters with duplicated ATPase domains                                                     | RBRH_02476 | Transposase                                              |
| -                | Transposase and inactivated derivatives                                                                                  | RBRH_03299 | Transposase                                              |
| -                | Hypothetical protein                                                                                                     | RBRH_02629 | Plasmid stability protein stbB                           |
| -                | Predicted nucleic acid-binding protein, contains PIN domain                                                              | RBRH_02630 | Hypothetical protein                                     |
| -                | Integrase                                                                                                                | RBRH_01549 | Hypothetical protein                                     |
| -                | Putative hemolysin                                                                                                       | RBRH_02330 | Multimodular transpeptidase-transglycosylase PBP 1A      |
| -                | Putative hemolysin                                                                                                       | RBRH_00133 | Multimodular transpeptidase-transglycosylase PBP 1A      |
| eno              | Septum formation initiator                                                                                               | RBRH_03848 | Enolase                                                  |
| kdsA             | Enolase                                                                                                                  | RBRH_03846 | 2-dehydro-3-deoxyphosphooctonate aldolase                |
| pyrG             | 3-deoxy-D-manno-octulosonic acid (KDO) 8-phosphate synthase                                                              | RBRH_03845 | CTP synthase                                             |
| ComA             | CTP synthase (UTP-ammonia lyase)                                                                                         | RBRH_03842 | DNA translocation competence protein ComA                |
| lolD             | Hypothetical protein                                                                                                     | RBRH_03840 | Lipoprotein releasing system ATP-binding protein lolD    |
| -                | ABC-type antimicrobial peptide transport system, A1 Pase                                                                 | RBRH_03839 | Lipoprotein releasing system transmembrane protein lolC  |
| BY123_A017700    | ABC-type transport system, involved in lipoprotein release, permease component                                           | RBRH_03837 | Regulatory protein                                       |
| recJ             | Uncharacterized protein conserved in bacteria                                                                            | RBRH_03836 | Single-stranded-DNA-specific exonuclease recJ            |
| prfB             | Single-stranded DNA-specific exonuclease                                                                                 | RBRH_03835 | Bacterial Peptide Chain Release Factor 2 (RF-2)          |
| lysS             | Protein chain release factor B                                                                                           | RBRH_03834 | Lysyl-tRNA synthetase                                    |
| Dsui_2362        | Lysyl-tRNA synthetase (class II)                                                                                         | RBRH_03833 | Outer membrane lipoprotein                               |
| -                | Outer membrane lipoprotein                                                                                               | RBRH_03802 | Exodeoxyribonuclease III                                 |
| BC1001_3356      | Transposase and inactivated derivatives                                                                                  | RBRH_02729 | Dipeptide-binding protein                                |
| serS             | Transcriptional regulator                                                                                                | RBRH_01029 | Seryl-tRNA synthetase                                    |
| -                | Seryl-tRNA synthetase                                                                                                    | RBRH_01030 | ATPase, AAA family                                       |
| -                | ATPase related to the helicase subunit of the Holliday junction resolvase                                                | RBRH_01032 | Outer-membrane lipoproteins carrier protein              |
| ftsK             | Outer membrane lipoprotein-sorting protein                                                                               | RBRH_01033 | Cell division protein ftsK                               |
| trxB2            | DNA segregation ATPase FtsK/SpoIIIE and related proteins                                                                 | RBRH_01034 | Thioredoxin reductase                                    |
| nadE             | Hypothetical protein                                                                                                     | RBRH_01038 | Glutamine-dependent NAD(+) synthetase                    |
| secG             | NAD synthase                                                                                                             | RBRH_02523 | Protein translocase subunit secG                         |
| tpiA             | Preprotein translocase subunit SecG                                                                                      | RBRH_02522 | Triosephosphate isomerase                                |
| Rleg4DRAFT_3636  | Triosephosphate isomerase                                                                                                | RBRH_03955 | Superfamily I DNA helicase                               |
| -                | Superfamily I DNA and RNA helicases and helicase subunits                                                                | RBRH_02521 | Quinone oxidoreductase                                   |
| pnp              | NADPH:quinone reductase and related Zn-dependent oxidoreductases                                                         | RBRH_02519 | Polyribonucleotide nucleotidyltransferase                |
| rpsO             | Polyribonucleotide nucleotidyltransferase (polynucleotide phosphorylase)                                                 | RBRH_02518 | SSU ribosomal protein S15P                               |
| -                | Ribosomal protein S15P/S13E                                                                                              | RBRH_02516 | Unnamed protein product                                  |
| -                | Predicted NTPase (NACHT family)                                                                                          | RBRH_02565 | Hypothetical cytosolic protein                           |
| -                | FOG: Ankyrin repeat                                                                                                      | RBRH_02539 | Hypothetical protein                                     |
| nuoN             | Hypothetical protein                                                                                                     | RBRH_02538 | NADH:quinone oxidoreductase chain N                      |
| nuoM             | NADH:ubiquinone oxidoreductase subunit 2 (chain N)                                                                       | RBRH_02537 | NADH:quinone oxidoreductase chain M                      |
| nuoL             | NADH:ubiquinone oxidoreductase subunit 4 (chain M)                                                                       | RBRH_02536 | NADH:quinone oxidoreductase chain L                      |
| nuoK             | NADH:ubiquinone oxidoreductase subunit 5 (chain L)/Multisubunit Na <sup>+</sup> /H <sup>+</sup> antiporter, MnhA subunit | RBRH_02535 | NADH:quinone oxidoreductase chain K                      |
| nuoJ             | NADH:ubiquinone oxidoreductase subunit 11 or 4L (chain K)                                                                | RBRH_02534 | NADH:quinone oxidoreductase chain J                      |
| nuoI             | NADH:ubiquinone oxidoreductase subunit 6 (chain J)                                                                       | RBRH_02533 | NADH:quinone oxidoreductase chain I                      |
| nuoH             | Formate hydrogenlyase subunit 6/NADH:ubiquinone oxidoreductase 23 kD subunit (chain I)                                   | RBRH_02532 | NADH:quinone oxidoreductase chain H                      |
| nuoG             | NADH:ubiquinone oxidoreductase subunit 1 (chain H)                                                                       | RBRH_02530 | NADH:quinone oxidoreductase chain G                      |
| nuoF             | NADH dehydrogenase/NADH:ubiquinone oxidoreductase 75 kD subunit (chain G)                                                | RBRH_02529 | NADH:quinone oxidoreductase chain F                      |
| nuoE             | NADH:ubiquinone oxidoreductase, NADH-binding (51 kD) subunit                                                             | RBRH_02528 | NADH:quinone oxidoreductase chain E                      |
| nuoD             | NADH:ubiquinone oxidoreductase 24 kD subunit                                                                             | RBRH_02527 | NADH:quinone oxidoreductase chain D                      |
| nuoC             | NADH:ubiquinone oxidoreductase 49 kD subunit 7                                                                           | RBRH_02526 | NADH:quinone oxidoreductase chain C                      |
| nuoB             | NADH:ubiquinone oxidoreductase 27 kD subunit                                                                             | RBRH_02525 | NADH:quinone oxidoreductase chain B                      |
| nuoA             | NADH:ubiquinone oxidoreductase 20 kD subunit and related Fe-S oxidoreductases                                            | RBRH_02524 | NADH:quinone oxidoreductase chain A                      |
| RBRH_03658       | NADH:ubiquinone oxidoreductase subunit 3 (chain A)                                                                       | RBRH_03658 | Hypothetical protein                                     |
| -                | Uncharacterized lipoprotein                                                                                              | RBRH_03796 | Acriflavin resistance periplasmic protein                |
| mdtB             | Membrane-fusion protein                                                                                                  | RBRH_03795 | Acriflavin resistance plasma membrane protein            |
| -                | Cation/multidrug efflux pump                                                                                             | RBRH_03794 | Acriflavin resistance plasma membrane protein            |
| -                | Growth inhibitor                                                                                                         | RBRH_02835 | Transcriptional regulator, MerR family                   |
| ihfA             | Predicted transcriptional regulators                                                                                     | RBRH_02834 | Integration host factor alpha-subunit                    |
| pheT             | Bacterial nucleoid DNA-binding protein                                                                                   | RBRH_02833 | Phenylalanyl-tRNA synthetase beta chain                  |
| pheS             | Phenylalanyl-tRNA synthetase beta subunit                                                                                | RBRH_02832 | Phenylalanyl-tRNA synthetase alpha chain                 |
| rplT             | Phenylalanyl-tRNA synthetase alpha subunit                                                                               | RBRH_02831 | LSU ribosomal protein L20P                               |
| rpmI             | Ribosomal protein L20                                                                                                    | RBRH_02830 | LSU ribosomal protein L35P                               |
| infC             | Ribosomal protein L35                                                                                                    | RBRH_02829 | Bacterial Protein Translation Initiation Factor 3 (IF-3) |
| thrS             | Translation initiation factor 3 (IF-3)                                                                                   | RBRH_02828 | Threonyl-tRNA synthetase                                 |
| -                | DNA uptake protein and related DNA-binding proteins                                                                      | RBRH_01723 | ADP-L-glycero-D-manno-heptose-6-epimerase                |
| -                | Nucleoside-diphosphate-sugar epimerases                                                                                  | RBRH_01722 | D-glycero-D-manno-heptose-7-phosphate 1-kinase           |
| -                | ADP-heptose synthase, bifunctional sugar kinase/adenylyltransferase                                                      | RBRH_01721 | UDP-glucose 6-dehydrogenase                              |
| -                | Predicted UDP-glucose 6-dehydrogenase                                                                                    | RBRH_01720 | Tetrapeptide repeat family protein                       |
| SG0766           | Uncharacterized integral membrane protein                                                                                | RBRH_03599 | Hypothetical cytosolic protein                           |
| ihfB             | Glucoamylase and related glycosyl hydrolases                                                                             | RBRH_01718 | Integration host factor beta-subunit                     |

|                  |                                                                                                     |            |                                                                            |
|------------------|-----------------------------------------------------------------------------------------------------|------------|----------------------------------------------------------------------------|
| rpsA             | Bacterial nucleoid DNA-binding protein                                                              | RBRH_01717 | SSU ribosomal protein SIP                                                  |
| cmk              | Ribosomal protein S1                                                                                | RBRH_01716 | Cytidylate kinase                                                          |
| aroA             | Cytidylate kinase                                                                                   | RBRH_01715 | 3-phosphoshikimate 1-carboxyvinyltransferase                               |
| tyrA             | 5-enolpyruvylshikimate-3-phosphate synthase                                                         | RBRH_01714 | Prephenate dehydrogenase                                                   |
| pheA             | Prephenate dehydrogenase                                                                            | RBRH_01713 | Chorismate mutase / Prephenate dehydratase                                 |
| serC             | Prephenate dehydratase                                                                              | RBRH_01712 | Phosphoserine aminotransferase                                             |
| -                | Phosphoserine aminotransferase                                                                      | RBRH_01711 | Unnamed protein product                                                    |
| gyrA             | Hypothetical protein                                                                                | RBRH_01710 | DNA gyrase subunit A                                                       |
| -                | Type IIA topoisomerase (DNA gyrase/topo II, topoisomerase IV), A subunit                            | RBRH_00055 | Outer membrane protein                                                     |
| ubiG             | Outer membrane protein and related peptidoglycan-associated (lipo)proteins                          | RBRH_00056 | 3-demethylubiquinone 3-methyltransferase                                   |
| gph              | 2-polypropyl-3-methyl-5-hydroxy-6-methoxy-1,4-benzoquinol methylase                                 | RBRH_00057 | Phosphoglycolate phosphatase                                               |
| KYC_15302        | Cell division protein FtsI/penicillin-binding protein 2                                             | RBRH_00944 | Outer membrane protein NOSA precursor                                      |
| upk              | Predicted S-adenosylmethionine-dependent methyltransferase                                          | RBRH_01430 | Undecaprenyl-diphosphatase                                                 |
| -                | Hypothetical protein                                                                                | RBRH_01434 | Protein-L-isoaspartate O-methyltransferase                                 |
| kdtA             | Protein-L-isoaspartate carboxylmethyltransferase                                                    | waaA       | 3-deoxy-D-manno-octulosonic-acid transferase                               |
| rfaC             | 3-deoxy-D-manno-octulosonic-acid transferase                                                        | waaC       | lipopolysaccharide heptosyltransferase-1                                   |
| -                | ADP-heptose:LPS heptosyltransferase                                                                 | manB       | phosphomannomutase                                                         |
| -                | Phosphomannomutase                                                                                  | galE       | UDP-glucose 4-epimerase                                                    |
| CAGGBEG34_200099 | UDP-glucose 4-epimerase                                                                             | wbiF       | glycosyltransferase                                                        |
| -                | SAM-dependent methyltransferases                                                                    | wzt        | polysaccharide export ATP-binding protein                                  |
| Rta_08890        | ABC-type polysaccharide/polyol phosphate transport system, ATPase component                         | wzm        | polysaccharide export ABC transporter permease protein                     |
| wbpM             | ABC-type polysaccharide/polyol phosphate export systems, permease component                         | wbiI       | nucleotide sugar epimerase/dehydratase                                     |
| CAGGBEG34_260027 | Predicted nucleoside-diphosphate sugar epimerases                                                   | wbiH       | UDP-N-acetylhexosamine-1-phosphate transferase                             |
| CAGGBEG34_190057 | UDP-N-acetylmuramyl pentapeptide phosphotransferase/UDP-N-acetylglucosamine-1-phosphate transferase | wbiG       | nucleotide sugar epimerase/dehydratase                                     |
| nrpR             | Nucleoside-diphosphate-sugar epimerases                                                             | RBRH_01535 | Putative regulatory protein                                                |
| glyA             | Predicted transcriptional regulator, consists of a Zn-ribbon and ATP-cone domains                   | RBRH_01534 | Serine hydroxymethyltransferase                                            |
| -                | Glycine/serine hydroxymethyltransferase                                                             | RBRH_01952 | 3-oxoacyl-[acyl-carrier protein] reductase                                 |
| -                | Short-chain alcohol dehydrogenase of unknown specificity                                            | RBRH_01531 | TolQ protein                                                               |
| tolR             | Biopolymer transport proteins                                                                       | RBRH_01530 | TolR protein                                                               |
| Bphy_2454        | Biopolymer transport protein                                                                        | RBRH_01529 | TolA protein                                                               |
| tolB             | Hypothetical protein                                                                                | RBRH_01528 | TolB protein                                                               |
| pal              | Periplasmic component of the Tol biopolymer transport system                                        | RBRH_01527 | Peptidoglycan-associated lipoprotein                                       |
| -                | Outer membrane protein and related peptidoglycan-associated (lipo)proteins                          | RBRH_01525 | Tol system periplasmic component YbgF                                      |
| -                | Uncharacterized conserved protein                                                                   | RBRH_01621 | DNA-binding protein HU                                                     |
| -                | Hypothetical protein                                                                                | RBRH_01189 | Lysozyme                                                                   |
| -                | Hypothetical protein                                                                                | RBRH_01186 | Lysozyme                                                                   |
| CAGGBEG34_220024 | Hypothetical protein                                                                                | RBRH_01185 | Holin                                                                      |
| metB             | Methyl-accepting chemotaxis protein                                                                 | RBRH_00193 | O-acetylhomoserine sulfolactase                                            |
| purF             | Cystathionine beta-lyases/cystathionine gamma-synthases                                             | RBRH_00192 | Amidophosphoribosyltransferase                                             |
| -                | Glutamine phosphoribosylpyrophosphate amidotransferase                                              | RBRH_00191 | Colicin V production protein                                               |
| P355_3030        | Uncharacterized membrane protein, required for colicin V production                                 | RBRH_00190 | Unnamed protein product                                                    |
| folC             | Uncharacterized protein conserved in bacteria                                                       | RBRH_00189 | Folypolyglutamate synthase                                                 |
| accD             | Folypolyglutamate synthase                                                                          | RBRH_00188 | Acetyl-coenzyme A carboxylase carboxyl transferase subunit beta            |
| trpA             | Acetyl-CoA carboxylase beta subunit                                                                 | RBRH_00187 | Tryptophan synthase alpha chain                                            |
| trpB             | Tryptophan synthase alpha chain                                                                     | RBRH_00185 | Tryptophan synthase beta chain                                             |
| -                | Tryptophan synthase beta chain                                                                      | RBRH_00184 | N-(5'-phosphoribosyl)anthranilate isomerase                                |
| truA             | Phosphoribosylanthranilate isomerase                                                                | RBRH_00183 | tRNA pseudouridine synthase A                                              |
| asd              | Pseudouridylylase                                                                                   | RBRH_00180 | Aspartate-semialdehyde dehydrogenase                                       |
| leuB1            | Aspartate-semialdehyde dehydrogenase                                                                | RBRH_00179 | 3-isopropylmalate dehydrogenase                                            |
| gltA             | Isocitrate/isopropylmalate dehydrogenase                                                            | RBRH_00175 | Citrate synthase                                                           |
| -                | Citrate synthase                                                                                    | RBRH_00174 | Tetratricopeptide repeat family protein                                    |
| sdhA             | Succinate dehydrogenase/fumarate reductase, Fe-S protein subunit                                    | RBRH_00172 | Succinate dehydrogenase flavoprotein subunit                               |
| -                | Succinate dehydrogenase/fumarate reductase, flavoprotein subunit                                    | RBRH_00171 | Succinate dehydrogenase membrane anchor subunit                            |
| SG0766           | Uncharacterized conserved protein                                                                   | RBRH_03599 | Hypothetical cytosolic protein                                             |
| -                | Uncharacterized conserved protein                                                                   | RBRH_00169 | Transcriptional regulator, GntR family                                     |
| mdh              | Transcriptional regulators                                                                          | RBRH_00167 | Malate dehydrogenase                                                       |
| acnA             | Hypothetical protein                                                                                | RBRH_00163 | Aconitate hydratase                                                        |
| thrC             | Aconitase A                                                                                         | RBRH_03673 | Threonine synthase                                                         |
| thrA             | Threonine synthase                                                                                  | RBRH_03674 | Homoserine dehydrogenase                                                   |
| aroE             | Na+/citrate symporter                                                                               | RBRH_03200 | Shikimate 5-dehydrogenase                                                  |
| -                | Shikimate 5-dehydrogenase                                                                           | RBRH_03201 | Exoribonuclease II                                                         |
| mpl              | Exoribonuclease R                                                                                   | RBRH_03203 | UDP-N-acetylmuramate-L-alanyl-gamma-D-glutamyl-meso-diaminopimelate ligase |
| aroQ             | Thiol-disulfide isomerase and thioredoxins                                                          | RBRH_03207 | 3-dehydroquinate dehydratase                                               |
| bccP             | 3-dehydroquinate dehydratase II                                                                     | RBRH_03208 | Biotin carboxyl carrier protein of acetyl-CoA carboxylase                  |
| accC             | Biotin carboxyl carrier protein                                                                     | RBRH_03209 | Biotin carboxylase                                                         |
| prmA             | Biotin carboxylase                                                                                  | RBRH_03210 | Ribosomal protein L11 methyltransferase                                    |
| tpx              | Ribosomal protein L11 methylase                                                                     | RBRH_03212 | Thioredoxin peroxidase                                                     |
| -                | Peroxioredoxin                                                                                      | RBRH_03213 | Adenosine kinase                                                           |
| -                | Sugar kinases, ribokinase family                                                                    | RBRH_03214 | Outer membrane lipoprotein                                                 |
| nrpB             | Hypothetical protein                                                                                | RBRH_03217 | Ribonucleoside-diphosphate reductase beta chain                            |
| nrpA             | Ribonucleotide reductase, beta subunit                                                              | RBRH_03219 | Ribonucleoside-diphosphate reductase alpha chain                           |
| ampD             | Ribonucleotide reductase, alpha subunit                                                             | RBRH_03220 | Anhydro-N-acetylmuramyl-tripeptide amidase                                 |
| -                | Negative regulator of beta-lactamase expression                                                     | RBRH_03222 | CcsA-related protein                                                       |
| ffh              | ABC-type uncharacterized transport system, permease component                                       | RBRH_03223 | Signal recognition particle, subunit FFH/SRP54                             |
| -                | Predicted NTPase (NACHT family)                                                                     | RBRH_03225 | MarC family integral membrane protein                                      |
| proS             | Multiple antibiotic transporter                                                                     | RBRH_03226 | Prolyl-tRNA synthetase                                                     |
| proB             | NTP pyrophosphohydrolases including oxidative damage repair enzymes                                 | RBRH_03230 | Glutamate 5-kinase                                                         |
| obgE             | Glutamate 5-kinase                                                                                  | RBRH_03231 | GTP-binding protein CgtA (probably involved in DNA repair)                 |
| rpmA             | Predicted GTPase                                                                                    | RBRH_03233 | LSU ribosomal protein L27P                                                 |
| rplU             | Ribosomal protein L27                                                                               | RBRH_03234 | LSU ribosomal protein L21P                                                 |
| -                | Ribosomal protein L21                                                                               | RBRH_01990 | Cytochrome c4                                                              |
| -                | Cytochrome c553                                                                                     | RBRH_01991 | Cytochrome c                                                               |
| -                | Cytochrome c, mono- and dihem variants                                                              | RBRH_01994 | Hypothetical protein                                                       |
| -                | 2-methylthioadenine synthetase                                                                      | RBRH_02006 | Hypothetical metal-binding protein                                         |
| -                | Predicted metal-dependent hydrolase                                                                 | RBRH_02007 | Cation transport protein chaC                                              |
| -                | Uncharacterized protein involved in cation transport                                                | RBRH_02008 | Magnesium and cobalt efflux protein corC                                   |
| Int              | Putative Mg2+ and Co2+ transporter CorC                                                             | RBRH_02009 | Apolipoprotein N-acyltransferase                                           |
| glyS             | Glycyl-tRNA synthetase, alpha subunit                                                               | RBRH_02011 | Glycyl-tRNA synthetase beta chain                                          |
| ksgA             | l-acyl-sn-glycerol-3-phosphate acyltransferase                                                      | RBRH_02051 | Dimethyladenosine transferase                                              |
| -                | Parvulin-like peptidyl-prolyl isomerase                                                             | RBRH_02054 | Organic solvent tolerance protein                                          |

|                  |                                                                                                                                                                                 |            |                                                                                                                     |
|------------------|---------------------------------------------------------------------------------------------------------------------------------------------------------------------------------|------------|---------------------------------------------------------------------------------------------------------------------|
| A33K_14291       | Nucleoside-diphosphate-sugar pyrophosphorylase involved in lipopolysaccharide biosynthesis/translation initiation factor 2B, gamma/epsilon subunits (eIF-2Bgamma/eIF-2Bepsilon) | RBRH_02057 | 2-polyprenyl-6-methoxyphenol hydroxylase                                                                            |
| fis              | 2-polyprenyl-6-methoxyphenol hydroxylase and related FAD-dependent oxidoreductases                                                                                              | RBRH_02059 | DNA-binding protein fis                                                                                             |
| purH             | Factor for inversion stimulation Fis, transcriptional activator                                                                                                                 | RBRH_02060 | Phosphoribosylamidoimidazolecarboxamide formyltransferase                                                           |
| ruvC             | AICAR transformylase/IMP cyclohydrolase PurH (only IMP cyclohydrolase domain in AfuI)                                                                                           | RBRH_02061 | Crossover junction endodeoxyribonuclease ruvC                                                                       |
| ruvA             | Holliday junction resolvase, endonuclease subunit                                                                                                                               | RBRH_02062 | Holliday junction DNA helicase ruvA                                                                                 |
| ruvB             | Holliday junction resolvase, DNA-binding subunit                                                                                                                                | RBRH_02063 | Holliday junction DNA helicase ruvB                                                                                 |
| tyrS             | Holliday junction resolvase, helicase subunit                                                                                                                                   | RBRH_02065 | Tyrosyl-tRNA synthetase                                                                                             |
| gcvP             | Predicted molecular chaperone distantly related to HSP70-fold metalloproteases                                                                                                  | RBRH_00844 | Glycine dehydrogenase [decarboxylating]                                                                             |
| -                | Glycine cleavage system protein P (pyridoxal-binding), C-terminal domain                                                                                                        | RBRH_00845 | Glycine cleavage system H protein                                                                                   |
| gcvT             | Glycine cleavage system H protein (lipoate-binding)                                                                                                                             | RBRH_00846 | Aminomethyltransferase                                                                                              |
| -                | Putative NADP-dependent oxidoreductases                                                                                                                                         | RBRH_00075 | Glutamine amidotransferase, class I                                                                                 |
| BURMUCGD1_0587   | Uncharacterized protein conserved in bacteria                                                                                                                                   | RBRH_01305 | Esterase                                                                                                            |
| -                | Phospholipase/lecithinase/hemolysin                                                                                                                                             | RBRH_01303 | D-alanyl-meso-diaminopimelate endopeptidase                                                                         |
| -                | D-alanyl-D-alanine carboxypeptidase (penicillin-binding protein 4)                                                                                                              | RBRH_01300 | Hypothetical protein                                                                                                |
| SG0735           | Hypothetical protein                                                                                                                                                            | RBRH_01306 | Sua5/YciO/YrdC/YwC family protein                                                                                   |
| purK             | ATPases with chaperone activity, ATP-binding subunit                                                                                                                            | RBRH_03599 | Hypothetical cytosolic protein                                                                                      |
| purE             | Uncharacterized conserved protein                                                                                                                                               | RBRH_01307 | Phosphoribosylamidoimidazole carboxylase NCAIR mutase subunit                                                       |
| purC             | Phosphoribosylamidoimidazole carboxylase (NCAIR synthetase)                                                                                                                     | RBRH_01308 | Phosphoribosylamidoimidazole carboxylase carboxyltransferase subunit                                                |
| fbaA             | Phosphoribosylcarboxyaminoimidazole (NCAIR) mutase                                                                                                                              | RBRH_01309 | Phosphoribosylamidoimidazole-succinocarboxamide synthase                                                            |
| pgk              | Phosphoribosylamidoimidazolesuccinocarboxamide (SAICAR) synthase                                                                                                                | RBRH_01310 | Fructose-bisphosphate aldolase                                                                                      |
| -                | Fructose/tagatose bisphosphate aldolase                                                                                                                                         | RBRH_01314 | Phosphoglycerate kinase                                                                                             |
| rfaF             | 3-phosphoglycerate kinase                                                                                                                                                       | RBRH_01318 | Branched-chain amino acid aminotransferase                                                                          |
| BRPE64_ACD804830 | Branched-chain amino acid aminotransferase/4-amino-4-deoxychorismate lyase                                                                                                      | RBRH_01321 | ADP-heptose-LPS heptosyltransferase II                                                                              |
| -                | ADP-heptose-LPS heptosyltransferase                                                                                                                                             | RBRH_01322 | Unnamed protein product                                                                                             |
| sucD             | Hypothetical protein                                                                                                                                                            | RBRH_01328 | Type 4 major prelipin protein pilA                                                                                  |
| Bcep1808_2762    | Membrane protein TerC, possibly involved in tellurium resistance                                                                                                                | RBRH_01237 | Succinyl-CoA synthetase alpha chain                                                                                 |
| recA             | Succinyl-CoA synthetase, beta subunit                                                                                                                                           | RBRH_01976 | Regulatory protein recX                                                                                             |
| -                | Uncharacterized protein conserved in bacteria                                                                                                                                   | RBRH_01977 | RecA protein                                                                                                        |
| -                | RecA/RadA recombinase                                                                                                                                                           | RBRH_00353 | Cytochrome b561                                                                                                     |
| CAGGBEG34_290002 | Uncharacterized paraquat-inducible protein A                                                                                                                                    | RBRH_01670 | Paraquat-inducible protein B                                                                                        |
| -                | Paraquat-inducible protein B                                                                                                                                                    | RBRH_01669 | Hypothetical protein                                                                                                |
| mmmA             | Hypothetical protein                                                                                                                                                            | RBRH_01681 | Adenylosuccinate lyase                                                                                              |
| -                | Adenylosuccinate lyase                                                                                                                                                          | RBRH_01680 | tRNA (5-methylaminomethyl-2-thiouridylyl)-methyltransferase                                                         |
| proA             | Lysine 2,3-aminomutase                                                                                                                                                          | RBRH_03176 | Hypothetical membrane spanning protein                                                                              |
| -                | Predicted membrane protein                                                                                                                                                      | RBRH_03177 | Gamma-glutamyl phosphate reductase                                                                                  |
| holA             | Gamma-glutamyl phosphate reductase                                                                                                                                              | RBRH_03178 | DNA polymerase III, delta subunit                                                                                   |
| BY123_A022000    | DNA polymerase III, delta subunit                                                                                                                                               | RBRH_03179 | Rare lipoprotein B precursor                                                                                        |
| leuS             | Rare lipoprotein B                                                                                                                                                              | RBRH_03180 | Leucyl-tRNA synthetase                                                                                              |
| dapB             | Leucyl-tRNA synthetase                                                                                                                                                          | RBRH_03182 | Dihydrodipicolinate reductase                                                                                       |
| furI             | Small protein A (mRNA-binding)                                                                                                                                                  | RBRH_03184 | Ferric uptake regulation protein                                                                                    |
| tktA             | Glyceraldehyde-3-phosphate dehydrogenase/erythrose-4-phosphate dehydrogenase                                                                                                    | RBRH_03187 | Transketolase                                                                                                       |
| -                | Transketolase                                                                                                                                                                   | RBRH_02069 | HesB protein family                                                                                                 |
| rpsI             | Uncharacterized conserved protein                                                                                                                                               | RBRH_02070 | SSU ribosomal protein S9P                                                                                           |
| rpIM             | Ribosomal protein S9                                                                                                                                                            | RBRH_02071 | LSU ribosomal protein L13P                                                                                          |
| recG             | Ribosomal protein L13                                                                                                                                                           | RBRH_01665 | ATP-dependent DNA helicase recG                                                                                     |
| queA             | RecG-like helicase                                                                                                                                                              | RBRH_01667 | protein=S-adenosylmethionine:tRNA ribosyltransferase-isomerase                                                      |
| tgt              | S-adenosylmethionine:tRNA-ribosyltransferase-isomerase (queuine synthetase)                                                                                                     | RBRH_01668 | Queuine tRNA-ribosyltransferase                                                                                     |
| secD             | Preprotein translocase subunit YajC                                                                                                                                             | RBRH_01676 | Protein translocase subunit secD                                                                                    |
| secE             | Preprotein translocase subunit SecD                                                                                                                                             | RBRH_01675 | Protein translocase subunit secE                                                                                    |
| A33K_15475       | Preprotein translocase subunit SecF                                                                                                                                             | RBRH_02721 | Transcriptional regulators, LysR family                                                                             |
| RSC2452          | ABC-type dipeptide transport system, periplasmic component                                                                                                                      | RBRH_00366 | Endonuclease                                                                                                        |
| -                | Phosphatidylserine/phosphatidylglycerophosphate/cardioliipin synthases and related enzymes                                                                                      | RBRH_00932 | 16S rRNA m(5)C 967 methyltransferase                                                                                |
| purN             | tRNA and rRNA cytosine-C5-methylases                                                                                                                                            | RBRH_00933 | Phosphoribosylglycinamide formyltransferase                                                                         |
| ribF             | Folate-dependent phosphoribosylglycinamide formyltransferase                                                                                                                    | RBRH_00935 | Riboflavin kinase                                                                                                   |
| ileS             | FAD synthase                                                                                                                                                                    | RBRH_00936 | Isoleucyl-tRNA synthetase                                                                                           |
| lspA             | Isoleucyl-tRNA synthetase                                                                                                                                                       | RBRH_00937 | Lipoprotein signal peptidase                                                                                        |
| dfp              | Lipoprotein signal peptidase                                                                                                                                                    | RBRH_00938 | Phosphopantothencycysteine decarboxylase                                                                            |
| dtu              | Phosphopantothencycysteine synthetase/decarboxylase                                                                                                                             | RBRH_00940 | Deoxyuridine 5'-triphosphate nucleotidohydrolase                                                                    |
| lpxC             | Uncharacterized conserved protein                                                                                                                                               | RBRH_00949 | UDP-3-O-[3-hydroxymyristoyl] N-acetylglucosamine deacetylase                                                        |
| ftsZ             | UDP-3-O-acetyl-N-acetylglucosamine deacetylase                                                                                                                                  | RBRH_00951 | Cell division protein ftsZ                                                                                          |
| ftsA             | Cell division GTPase                                                                                                                                                            | RBRH_00952 | Cell division protein ftsA                                                                                          |
| -                | Actin-like ATPase involved in cell division                                                                                                                                     | RBRH_00953 | Cell division protein ftsQ                                                                                          |
| -                | Cell division septal protein                                                                                                                                                    | RBRH_00954 | D-alanine--D-alanine ligase                                                                                         |
| murC             | D-alanine-D-alanine ligase and related ATP-grasp enzymes                                                                                                                        | RBRH_00955 | UDP-N-acetylmuramate--alanine ligase                                                                                |
| murG             | UDP-N-acetylmuramate-alanine ligase                                                                                                                                             | RBRH_00956 | UDP-N-acetylglucosamine--N-acetylmuramyl-(pentapeptide) pyrophosphoryl-undecaprenol N-acetylglucosamine transferase |
| ftsW             | UDP-N-acetylglucosamine-LPS N-acetylglucosamine transferase                                                                                                                     | RBRH_00957 | Cell division protein ftsW                                                                                          |
| murD             | Bacterial cell division membrane protein                                                                                                                                        | RBRH_00958 | UDP-N-acetylmuramoylalanine--D-glutamate ligase                                                                     |
| mraY             | UDP-N-acetylmuramoylalanine-D-glutamate ligase                                                                                                                                  | RBRH_00959 | Phospho-N-acetylmuramoyl-pentapeptide-transferase                                                                   |
| -                | UDP-N-acetylmuramyl pentapeptide phosphotransferase/UDP-N-acetylglucosamine-1-phosphate transferase                                                                             | RBRH_00960 | UDP-N-acetylmuramoyl-tripeptide--D-alanyl-D-alanine ligase                                                          |
| murE             | UDP-N-acetylmuramyl pentapeptide synthase                                                                                                                                       | RBRH_00961 | UDP-N-acetylmuramoylalanyl-D-glutamate--2,6-diaminopimelate ligase                                                  |
| ftsI             | UDP-N-acetylmuramyl tripeptide synthase                                                                                                                                         | RBRH_00962 | Division specific D,D-transpeptidase/Cell division protein ftsI                                                     |
| mraW             | Cell division protein                                                                                                                                                           | RBRH_03264 | S-adenosyl-methyltransferase mraW                                                                                   |
| mraZ             | Predicted S-adenosylmethionine-dependent methyltransferase involved in cell envelope biogenesis                                                                                 | RBRH_03265 | Cell division protein mraZ                                                                                          |
| -                | Hypothetical protein                                                                                                                                                            | RBRH_03267 | 2-polyprenyl-3-methyl-6-methoxy-1,4-benzoquinol hydroxylase                                                         |
| RBRH_03270       | Ubiquinone biosynthesis protein COQ7                                                                                                                                            | RBRH_03270 | Outer membrane porin protein 32 precursor                                                                           |
| fadD1            | Outer membrane protein (porin)                                                                                                                                                  | RBRH_03271 | Long-chain-fatty-acid--CoA ligase                                                                                   |
| phoU             | Acyl-CoA synthetases (AMP-forming)/AMP-acid ligases II                                                                                                                          | RBRH_01093 | Phosphate transport system protein phoU                                                                             |
| pstB             | Phosphate uptake regulator                                                                                                                                                      | RBRH_01094 | Phosphate transport ATP-binding protein pstB                                                                        |
| pstA             | ABC-type phosphate transport system, ATPase component                                                                                                                           | RBRH_01095 | Phosphate transport system permease protein pstA                                                                    |
| pstC             | ABC-type phosphate transport system, permease component                                                                                                                         | RBRH_01096 | Phosphate transport system permease protein pstC                                                                    |
| -                | ABC-type phosphate transport system, permease component                                                                                                                         | RBRH_01097 | Phosphate-binding protein                                                                                           |
| glmM             | FOG: WD40 repeat                                                                                                                                                                | RBRH_01098 | Phosphogluconate mutase                                                                                             |
| folP             | Phosphomannomutase                                                                                                                                                              | RBRH_01099 | Dihydroterate synthase                                                                                              |
| ftsH             | Dihydroterate synthase and related enzymes                                                                                                                                      | RBRH_01100 | Cell division protein ftsH                                                                                          |
| rrmJ             | ATP-dependent Zn proteases                                                                                                                                                      | RBRH_01102 | 23S rRNA Um2552 2'-O-methyltransferase                                                                              |
| -                | 23S rRNA methylase                                                                                                                                                              | RBRH_01103 | Hypothetical RNA binding protein                                                                                    |

|                 |                                                                                                              |            |                                                                         |
|-----------------|--------------------------------------------------------------------------------------------------------------|------------|-------------------------------------------------------------------------|
| greA            | Predicted RNA-binding protein containing KH domain, possibly ribosomal protein                               | RBRH_01105 | Transcription elongation factor greA                                    |
| carA            | Carbamoylphosphate synthase large subunit (split gene in MJ)                                                 | RBRH_01107 | Carbamoyl-phosphate synthase small chain                                |
| -               | Carbamoylphosphate synthase small subunit                                                                    | RBRH_01113 | Ribonuclease HI                                                         |
| -               | Ribonuclease HI                                                                                              | RBRH_01112 | Methyltransferase                                                       |
| dnaQ            | Soluble lytic murein transglycosylase and related regulatory proteins (some contain LysM/invasin domains)    | RBRH_01114 | DNA polymerase III, epsilon chain                                       |
| pyrC            | Type IV secretory pathway, VirB11 components, and related ATPases involved in archaeal flagella biosynthesis | RBRH_02074 | Dihydroorotase                                                          |
| -               | Dihydroorotase                                                                                               | RBRH_00912 | Branched-chain amino acid transport ATP-binding protein livF            |
| -               | ABC-type branched-chain amino acid transport systems, ATPase component                                       | RBRH_00913 | Branched-chain amino acid transport ATP-binding protein livG            |
| -               | ABC-type branched-chain amino acid transport systems, ATPase component                                       | RBRH_00914 | Branched-chain amino acid transport system permease protein livM        |
| -               | ABC-type branched-chain amino acid transport system, permease component                                      | RBRH_00915 | Branched-chain amino acid transport system permease protein livH        |
| ispH            | Branched-chain amino acid ABC-type transport system, permease components                                     | RBRH_00920 | 4-hydroxy-3-methylbut-2-enyl diphosphate reductase                      |
| fkpB            | Penicillin tolerance protein                                                                                 | RBRH_00921 | Peptidyl-prolyl cis-trans isomerase                                     |
| -               | FKBP-type peptidyl-prolyl cis-trans isomerases 2                                                             | RBRH_00922 | DNA repair protein radC                                                 |
| -               | DNA repair proteins                                                                                          | RBRH_00923 | LSU ribosomal protein L28P                                              |
| rpmG            | Ribosomal protein L28                                                                                        | RBRH_00925 | LSU ribosomal protein L33P                                              |
| nadB            | Ribosomal protein L33                                                                                        | RBRH_00926 | L-aspartate oxidase                                                     |
| rfbD            | Predicted glycosyltransferases                                                                               | rmlD       | dTDP-4-dehydrohamnose reductase                                         |
| -               | dTDP-4-dehydrohamnose reductase                                                                              | rmlC       | dTDP-4-dehydrohamnose 3,5-epimerase                                     |
| -               | dTDP-4-dehydrohamnose 3,5-epimerase and related enzymes                                                      | rmlA       | glucose-1-phosphate thymidyltransferase                                 |
| -               | dTDP-glucose pyrophosphorylase                                                                               | rmlB       | dTDP-glucose 4,6-dehydratase                                            |
| nadC            | Glycosyltransferases involved in cell wall biogenesis                                                        | RBRH_00927 | Nicotinate-nucleotide pyrophosphorylase                                 |
| nadA            | Nicotinate-nucleotide pyrophosphorylase                                                                      | RBRH_00928 | Quinolinate synthetase A                                                |
| -               | Quinolinate synthase                                                                                         | RBRH_00929 | Acyl-CoA desaturase                                                     |
| -               | Fatty-acid desaturase                                                                                        | RBRH_02153 | Ferredoxin                                                              |
| coaD            | Ferredoxin                                                                                                   | RBRH_02154 | Phosphopantetheine adenylyltransferase                                  |
| -               | Phosphopantetheine adenylyltransferase                                                                       | RBRH_02155 | Methyltransferase                                                       |
| -               | Signal recognition particle GTPase                                                                           | RBRH_02159 | Fumarylpyruvate hydrolase                                               |
| rpoH            | Molecular chaperone (small heat shock protein)                                                               | RBRH_02167 | RNA polymerase sigma-32 factor                                          |
| clpA            | Hypothetical protein                                                                                         | RBRH_00941 | ATP-dependent clp protease ATP-binding subunit clpA                     |
| clpS            | ATPases with chaperone activity, ATP-binding subunit                                                         | RBRH_00942 | ATP-dependent Clp protease adaptor protein ClpS                         |
| cyoE            | Uncharacterized protein SCO1/SenC/PrrC, involved in biogenesis of respiratory and photosynthetic systems     | RBRH_02178 | Protoheme IX farnesyltransferase                                        |
| ctaA            | Polyprenyltransferase (cytochrome oxidase assembly factor)                                                   | RBRH_02179 | Heme O monooxygenase (ferredoxin)                                       |
| Bphyt_0552      | Uncharacterized protein required for cytochrome oxidase assembly                                             | RBRH_02180 | Hypothetical protein                                                    |
| -               | Hypothetical protein                                                                                         | RBRH_02181 | Cytochrome c oxidase assembly protein SurfI                             |
| coxC            | Hypothetical protein                                                                                         | RBRH_02183 | Cytochrome c oxidase polypeptide III                                    |
| -               | Heme/copper-type cytochrome/quinol oxidase, subunit 3                                                        | RBRH_02186 | Cytochrome c oxidase polypeptide I                                      |
| coxB            | Heme/copper-type cytochrome/quinol oxidases, subunit 1                                                       | RBRH_02187 | Cytochrome c oxidase polypeptide II                                     |
| bioC            | Heme/copper-type cytochrome/quinol oxidases, subunit 2                                                       | RBRH_04087 | Biotin synthesis protein bioC                                           |
| yihK            | Predicted amidophosphoribosyltransferases                                                                    | RBRH_02190 | 23S rRNA methyltransferase                                              |
| gpsA            | Predicted rRNA methylase (SpoU class)                                                                        | RBRH_02191 | Glycerol-3-phosphate dehydrogenase [NAD(P)+                             |
| secB            | Glycerol-3-phosphate dehydrogenase                                                                           | RBRH_02192 | Protein translocase subunit secB                                        |
| grxC            | Preprotein translocase subunit SecB                                                                          | RBRH_02193 | Glutaredoxin                                                            |
| gpmA            | Rhodanese-related sulfurtransferase                                                                          | RBRH_02197 | Phosphoglycerate mutase                                                 |
| thiF            | Periplasmic protease                                                                                         | RBRH_02200 | Molybdopterin biosynthesis MoeB protein                                 |
| icd             | Cold shock proteins                                                                                          | RBRH_00946 | socitrate dehydrogenase [NADP]                                          |
| sodB            | Uncharacterized conserved protein                                                                            | RBRH_04037 | Superoxide dismutase                                                    |
| xseA            | Superoxide dismutase                                                                                         | RBRH_03275 | Exodeoxyribonuclease VII large subunit                                  |
| -               | Tetraacyldisaccharide-1-P 4'-kinase                                                                          | RBRH_03277 | conserved cytosolic protein                                             |
| kdsB            | Uncharacterized conserved protein                                                                            | RBRH_03278 | 3-deoxy-manno-octulosonate cytidylyltransferase                         |
| adk             | CMP-2-keto-3-deoxyoctulosonic acid synthetase                                                                | RBRH_03279 | Adenylate kinase / Nucleoside-diphosphate kinase                        |
| mviN            | Adenylate kinase and related kinases                                                                         | RBRH_03318 | Virulence factor mviN                                                   |
| rpsN            | Uncharacterized membrane protein, putative virulence factor                                                  | RBRH_03319 | SSU ribosomal protein S20P                                              |
| argF            | Hypothetical protein                                                                                         | RBRH_03322 | Ornithine carbamoyltransferase                                          |
| -               | Ornithine carbamoyltransferase                                                                               | RBRH_00290 | Argininosuccinate synthase                                              |
| murB            | Argininosuccinate synthase                                                                                   | RBRH_03323 | UDP-N-acetylenolpyruvoylglucosamine reductase                           |
| -               | UDP-N-acetylmuramate dehydrogenase                                                                           | RBRH_03324 | Protein yajQ                                                            |
| h16_A0588       | Uncharacterized protein conserved in bacteria                                                                | RBRH_03325 | Hypothetical membrane spanning protein                                  |
| ppa             | Acyl-CoA synthetases (AMP-forming)/AMP-acid ligases II                                                       | RBRH_01042 | Inorganic pyrophosphatase                                               |
| xerD            | Inorganic pyrophosphatase                                                                                    | RBRH_03335 | Integrase/recombinase (XerD/RipX family)                                |
| ogt             | Site-specific recombinase XerD                                                                               | RBRH_03336 | O6-methylguanine-DNA methyltransferase                                  |
| -               | Hypothetical protein                                                                                         | RBRH_03337 | iron-sulfur cluster-binding protein                                     |
| bgla_1g32700    | Uncharacterized Fe-S protein                                                                                 | RBRH_03338 | ATP/GTP hydrolase                                                       |
| amiA            | Predicted ATPase or kinase                                                                                   | RBRH_03339 | N-acetylmuramoyl-L-alanine amidase                                      |
| dedA            | N-acetylmuramoyl-L-alanine amidase                                                                           | RBRH_03340 | DedA family protein                                                     |
| mutL            | Uncharacterized membrane-associated protein                                                                  | RBRH_01632 | DNA mismatch repair protein mutL                                        |
| miaA            | DNA mismatch repair enzyme (predicted ATPase)                                                                | RBRH_01633 | tRNA delta(2)-isopentenylpyrophosphate transferase                      |
| purM            | tRNA delta(2)-isopentenylpyrophosphate transferase                                                           | RBRH_01634 | Phosphoribosylformylglycinamide cyclo-ligase                            |
| -               | Phosphoribosylaminoimidazole (AIR) synthetase                                                                | RBRH_01635 | DnaA-related protein                                                    |
| -               | ATPase involved in DNA replication initiation                                                                | RBRH_01636 | Phosphoserine phosphatase                                               |
| pcnB            | Phosphoserine phosphatase                                                                                    | RBRH_01637 | Poly(A) polymerase                                                      |
| -               | DNA-binding protein H-NS                                                                                     | RBRH_02753 | Leucine-, isoleucine-, valine-, threonine-, and alanine-binding protein |
| -               | Hypothetical protein                                                                                         | RBRH_01969 | Endonuclease/Exonuclease/phosphatase family protein]                    |
| -               | Metal-dependent hydrolase                                                                                    | RBRH_00365 | Ferredoxin--NADP reductase                                              |
| -               | Hypothetical protein                                                                                         | RBRH_00766 | Hypophosphite dioxygenase                                               |
| serA            | DNA-binding protein H-NS                                                                                     | RBRH_01278 | D-3-phosphoglycerate dehydrogenase                                      |
| leuD            | FOG: Ankyrin repeat                                                                                          | RBRH_00178 | 3-isopropylmalate dehydratase small subunit                             |
| leuC            | 3-isopropylmalate dehydratase small subunit                                                                  | RBRH_00176 | 3-isopropylmalate dehydratase large subunit                             |
| ptsl            | 3-isopropylmalate dehydratase large subunit                                                                  | RBRH_02201 | Phosphoenolpyruvate-protein phosphotransferase                          |
| pstH            | Phosphoenolpyruvate-protein kinase (PTS system EI component in bacteria)                                     | RBRH_02202 | Phosphocarrier protein HPr                                              |
| -               | Phosphotransferase system, HPr-related proteins                                                              | RBRH_02203 | PTS system, IIA component                                               |
| -               | Phosphotransferase system, mannose/fructose-specific component IIA                                           | RBRH_02207 | Nitrogen regulatory protein GlnK                                        |
| -               | Nitrogen regulatory protein PII                                                                              | RBRH_02209 | Hypothetical protein                                                    |
| -               | Uncharacterized protein conserved in bacteria                                                                | RBRH_02210 | ATPase related to magnesium chelatase subunit ChlI                      |
| -               | Uncharacterized conserved protein                                                                            | RBRH_02229 | Hypothetical protein                                                    |
| -               | small molecule metabolism                                                                                    | RBRH_02238 | Unnamed protein product                                                 |
| metHa           | Hypothetical protein                                                                                         | RBRH_02239 | 5-methyltetrahydrofolate--homocysteine methyltransferase                |
| metHb           | Methionine synthase I (cobalamin-dependent), methyltransferase domain                                        | RBRH_01971 | 5-methyltetrahydrofolate--homocysteine methyltransferase                |
| -               | Carbonic anhydrase                                                                                           | RBRH_03113 | Dipeptide-binding protein                                               |
| BgramDRAFT_1585 | ABC-type dipeptide transport system, periplasmic component                                                   | RBRH_03115 | Thiol:disulfide interchange protein dsbA                                |

|                   |                                                                                              |            |                                                              |
|-------------------|----------------------------------------------------------------------------------------------|------------|--------------------------------------------------------------|
| K788_4134         | Thiol-disulfide isomerase and thioredoxins                                                   | RBRH_03116 | Cell division protein ftsN                                   |
| argS              | Cell division protein                                                                        | RBRH_01973 | Arginyl-tRNA synthetase                                      |
| WQE_03647         | Arginyl-tRNA synthetase                                                                      | RBRH_01972 | Unnamed protein product                                      |
| -                 | Transposase and inactivated derivatives                                                      | RBRH_02628 | Transposase                                                  |
| trmE              | Integrase                                                                                    | RBRH_00972 | tRNA (5-carboxymethylaminomethyl-2-thiouridylylate) synthase |
| phrB              | Predicted GTPase                                                                             | RBRH_03918 | Deoxyribodipyrimidine photolyase                             |
| -                 | FOG: Ankyrin repeat                                                                          | RBRH_03381 | Transposase                                                  |
| -                 | FOG: Ankyrin repeat                                                                          | RBRH_03381 | Transposase                                                  |
| -                 | Transposase and inactivated derivatives, IS5 family                                          | RBRH_02228 | D-glycero-D-manno-heptose-1-phosphate adenyllyltransferase   |
| -                 | ADP-heptose synthase, bifunctional sugar kinase/adenyllyltransferase                         | RBRH_02227 | pantothenate kinase                                          |
| BC1001_0218       | Putative transcriptional regulator, homolog of Bvg accessory factor                          | RBRH_02226 | Biotin operon repressor / Biotin-[acyl-CoA-carboxylase       |
| dppB              | Biotin-(acetyl-CoA carboxylase) ligase                                                       | RBRH_02730 | Dipeptide transport system permease protein dppB             |
| -                 | ABC-type dipeptide/oligopeptide/nickel transport systems, permease components                | RBRH_02731 | Dipeptide transport system permease protein dppC             |
| -                 | ABC-type dipeptide/oligopeptide/nickel transport systems, permease components                | RBRH_02732 | Dipeptide transport ATP-binding protein dppD                 |
| dppF              | ABC-type dipeptide/oligopeptide/nickel transport system, ATPase component                    | RBRH_02733 | Dipeptide transport ATP-binding protein dppF                 |
| -                 | Beta-lactamase class D                                                                       | RBRH_02248 | Queuosine biosynthesis protein QueC                          |
| -                 | Predicted PP-loop superfamily ATPase                                                         | RBRH_02247 | Queuosine biosynthesis protein QueE                          |
| -                 | Organic radical activating enzymes                                                           | RBRH_02246 | 6-pyruvoyl tetrahydropterin synthase                         |
| mdrB              | 6-pyruvoyl-tetrahydropterin synthase                                                         | RBRH_02245 | Rod shape-determining protein rodA                           |
| mrda              | Bacterial cell division membrane protein                                                     | RBRH_02244 | Cell elongation specific D,D-transpeptidase                  |
| mreD              | Cell division protein FtsI/penicillin-binding protein 2                                      | RBRH_02243 | Rod shape-determining protein mreD                           |
| mreC              | Cell shape-determining protein                                                               | RBRH_02242 | Rod shape-determining protein mreC                           |
| gatC              | Actin-like ATPase involved in cell morphogenesis                                             | RBRH_01001 | Aspartyl/glutamyl-tRNA(Asn/Gln) amidotransferase subunit C   |
| gatA              | Asp-tRNAAsn/Glu-tRNA Gln amidotransferase C subunit                                          | RBRH_01000 | Aspartyl/glutamyl-tRNA(Asn/Gln) amidotransferase subunit A   |
| gatB              | Asp-tRNAAsn/Glu-tRNA Gln amidotransferase A subunit and related amidases                     | RBRH_00999 | Aspartyl/glutamyl-tRNA(Asn/Gln) amidotransferase subunit B   |
| -                 | Asp-tRNAAsn/Glu-tRNA Gln amidotransferase B subunit (PET112 homolog)                         | RBRH_00998 | Exodeoxyribonuclease III                                     |
| BCh11DRAFT_04361  | Exonuclease III                                                                              | RBRH_00997 | Zinc metalloprotease                                         |
| -                 | Zn-dependent protease with chaperone function                                                | RBRH_00996 | AmpG protein                                                 |
| metW              | Permeases of the major facilitator superfamily                                               | RBRH_00995 | Methyltransferase                                            |
| argB              | Homoserine acetyltransferase                                                                 | RBRH_00991 | Acetylglutamate kinase                                       |
| hslU              | Acetylglutamate kinase                                                                       | RBRH_03413 | ATP-dependent endopeptidase hsl ATP-binding subunit hslU     |
| clpQ              | ATP-dependent protease HslVU (ClpYQ), ATPase subunit                                         | RBRH_03414 | ATP-dependent endopeptidase hsl proteolytic subunit hslV     |
| dksA              | ATP-dependent protease HslVU (ClpYQ), peptidase subunit                                      | RBRH_03416 | DnaK suppressor protein                                      |
| -                 | Cytochrome c551/c552                                                                         | RBRH_03061 | 21 kDa hemolysin precursor                                   |
| -                 | Predicted periplasmic or secreted lipoprotein                                                | RBRH_03060 | Phosphoheptose isomerase                                     |
| -                 | Predicted endonuclease distantly related to archaeal Holliday junction resolvase             | RBRH_03058 | Tetrapyrrole (Corrin/Porphyrin) methylase family protein     |
| -                 | Transposase and inactivated derivatives                                                      | RBRH_00882 | Transposase                                                  |
| -                 | Transposase and inactivated derivatives                                                      | RBRH_01683 | Transposase                                                  |
| -                 | Transposase and inactivated derivatives                                                      | RBRH_03170 | Transposase                                                  |
| -                 | Transposase and inactivated derivatives                                                      | RBRH_01145 | Transposase                                                  |
| lipA              | 18 : Unknown function                                                                        | RBRH_02213 | Lipoic acid synthetase                                       |
| -                 | Lipoate-protein ligase B                                                                     | RBRH_02217 | Hypothetical protein                                         |
| -                 | Branched-chain amino acid aminotransferase/4-amino-4-deoxychorismate lyase                   | RBRH_02218 | D-alanyl-D-alanine serine-type carboxypeptidase              |
| -                 | D-alanyl-D-alanine carboxypeptidase                                                          | RBRH_02220 | Alpha/beta hydrolase                                         |
| -                 | Ferredoxin                                                                                   | RBRH_01263 | Unnamed protein product                                      |
| -                 | Response regulator containing CheY-like receiver, AAA-type ATPase, and DNA-binding domains   | RBRH_01264 | Nitrogen regulation protein ntrY                             |
| -                 | Signal transduction histidine kinase involved in nitrogen fixation and metabolism regulation | RBRH_01265 | Hypothetical protein                                         |
| -                 | Hypothetical protein                                                                         | RBRH_01266 | 16S rRNA m(5)C 967 methyltransferase                         |
| fnt               | tRNA and rRNA cytosine-C5-methylases                                                         | RBRH_01268 | Methionyl-tRNA formyltransferase                             |
| hpx               | Methionyl-tRNA formyltransferase                                                             | RBRH_01267 | Endopeptidase hpx                                            |
| defI              | 4-amino-4-deoxy-L-arabinose transferase and related glycosyltransferases of PMT family       | RBRH_01269 | Peptide deformylase                                          |
| -                 | Predicted Rossmann fold nucleotide-binding protein involved in DNA uptake                    | RBRH_01271 | Thiol-disulfide isomerase and thioredoxins                   |
| topB              | Thiol-disulfide isomerase and thioredoxins                                                   | RBRH_01273 | DNA topoisomerase III                                        |
| -                 | DNA-damage-inducible protein J                                                               | RBRH_00968 | 60 kDa inner membrane protein Y1DC                           |
| <b>pBRH01</b>     |                                                                                              |            |                                                              |
| -                 | FOG: HEAT repeat                                                                             | RBRH_04258 | Reverse transcriptase                                        |
| Dehly_0278        | Retron-type reverse transcriptase                                                            | RBRH_00621 | Transposase                                                  |
| BamMC406_2351     | Transposase and inactivated derivatives                                                      | RBRH_00447 | Transposase                                                  |
| -                 | Transposase and inactivated derivatives                                                      | RBRH_00446 | Transposase                                                  |
| -                 | Transposase and inactivated derivatives                                                      | RBRH_00621 | Transposase                                                  |
| CAGGBEG34_210015  | ABC-type branched-chain amino acid transport systems, periplasmic component                  | RBRH_03040 | Transporter, drug/metabolite exporter family                 |
| CAGGBEG34_210015  | ABC-type branched-chain amino acid transport systems, periplasmic component                  | RBRH_00303 | Transporter, drug/metabolite exporter family                 |
| -                 | Valyl-tRNA synthetase                                                                        | RBRH_00327 | Hypothetical cytosolic protein                               |
| argA              | Fe-S cluster protector protein                                                               | RBRH_00328 | Amino-acid acetyltransferase                                 |
| hrpA              | Acetylglutamate kinase                                                                       | RBRH_00329 | ATP-dependent helicase hrpA                                  |
| -                 | InterPro IPR001584 COGs COG2801                                                              | RBRH_04249 | Transposase                                                  |
| -                 | Hypothetical protein                                                                         | RBRH_00621 | Transposase                                                  |
| RBRH_00570        | Methyl-accepting chemotaxis protein                                                          | RBRH_00570 | Citrate/L-malate proton symporter                            |
| -                 | Orotidine-5'-phosphate decarboxylase                                                         | RBRH_00570 | Citrate/L-malate proton symporter                            |
| tmpA              | Helicase subunit of the DNA excision repair complex                                          | RBRH_00621 | Transposase                                                  |
| L810_8411         | Spermidine/putrescine-binding periplasmic protein                                            | RBRH_00295 | Transcriptional regulators, LysR family                      |
| BgramDRAFT_0582   | DNA-binding HTH domain-containing proteins                                                   | hrpB       | regulatory protein HrpB                                      |
| BgramDRAFT_0573   | Hypothetical protein                                                                         | RBRH_03540 | transcriptional regulatory protein                           |
| hpaB              | Mannose-1-phosphate guanylyltransferase                                                      | hpaB       | type III secretion protein HpaB                              |
| bgla_2g02110      | Trypsin-like serine proteases, typically periplasmic, contain C-terminal PDZ domain          | setE       | type III secretion protein SetE                              |
| bgla_2g02120      | FOG: CBS domain                                                                              | setD       | type III secretion protein SetD                              |
| BgramDRAFT_0557   | Fe2+ transport system protein B                                                              | setS       | type III secretion inner membrane protein SetS               |
| yscR              | Type III secretory pathway, component EscS                                                   | setR       | type III secretion inner membrane protein SetR               |
| PMI06_000610      | Type III secretory pathway, component EscR                                                   | setQ       | type III secretion apparatus protein SetQ                    |
| -                 | Hypothetical protein                                                                         | setV       | type III secretion inner membrane protein SetV               |
| setU              | Type III secretory pathway, component EscV                                                   | RBRH_00570 | Citrate/L-malate proton symporter                            |
| BamMEX5DRAFT_4566 | Uncharacterized protein conserved in bacteria                                                | setC       | type III secretion outer membrane pore SetC                  |
| -                 | Uncharacterized conserved protein                                                            | RBRH_00334 | Integral membrane protein                                    |
| BCh11DRAFT_07142  | Putative cation transport regulator                                                          | RBRH_00335 | Exodeoxyribonuclease V gamma chain                           |
| WQE_32336         | Exonuclease V gamma subunit                                                                  | RBRH_03044 | Exodeoxyribonuclease V beta chain                            |

|                 |                                                                                                  |            |                                                                                         |
|-----------------|--------------------------------------------------------------------------------------------------|------------|-----------------------------------------------------------------------------------------|
| recD            | ATP-dependent exoDNase (exonuclease V) beta subunit (contains helicase and exonuclease domains)  | RBRH_03043 | Exodeoxyribonuclease V alpha chain                                                      |
| -               | Electron transfer flavoprotein, alpha subunit                                                    | RBRH_03995 | Acyl-CoA dehydrogenase                                                                  |
| -               | Uncharacterized protein conserved in bacteria                                                    | RBRH_02803 | Potassium-transporting ATPase A chain                                                   |
| -               | K <sup>+</sup> -transporting ATPase, A chain                                                     | RBRH_02804 | Potassium-transporting ATPase B chain                                                   |
| -               | High-affinity K <sup>+</sup> transport system, ATPase chain B                                    | RBRH_02805 | Potassium-transporting ATPase C chain                                                   |
| RBRH_00570      | DNA polymerase III, alpha subunit                                                                | RBRH_00570 | Citrate/L-malate proton symporter                                                       |
| SG0735          | Uracil-DNA glycosylase                                                                           | RBRH_02783 | Hypothetical cytosolic protein                                                          |
| thiD            | Uncharacterized conserved protein                                                                | RBRH_00322 | Phosphomethylpyrimidine kinase/ Hydroxymethylpyrimidine kinase                          |
| lpiT            | Hydroxymethylpyrimidine/phosphomethylpyrimidine kinase                                           | RBRH_00323 | Lysophospholipid transporter family protein                                             |
| -               | Permeases of the major facilitator superfamily                                                   | RBRH_00324 | Alanine racemase                                                                        |
| sms             | Alanine racemase                                                                                 | RBRH_00325 | DNA repair protein RadA                                                                 |
| RBRH_00570      | Phenylpropionate dioxygenase and related ring-hydroxylating dioxygenases, large terminal subunit | RBRH_00570 | Citrate/L-malate proton symporter                                                       |
| -               | ABC-type spermidine/putrescine transport system, permease component II                           | RBRH_03496 | Transporter                                                                             |
| PACG_03516      | ABC-type spermidine/putrescine transport system, permease component II                           | RBRH_03496 | Transporter                                                                             |
| dxs             | Geranylgeranyl pyrophosphate synthase                                                            | RBRH_03430 | 1-deoxy-D-xylulose 5-phosphate synthase                                                 |
| RBRH_03529      | Diacylglycerol kinase                                                                            | RBRH_03529 | Phosphoglycerol transferase MdoB and related proteins, alkaline phosphatase superfamily |
| SG0735          | Porphobilinogen deaminase                                                                        | RBRH_02783 | Hypothetical cytosolic protein                                                          |
| RALTA_B0823     | Spermidine/putrescine-binding periplasmic protein                                                | RBRH_00295 | Transcriptional regulators, LysR family                                                 |
| L810_8411       | Spermidine/putrescine-binding periplasmic protein                                                | RBRH_00295 | Transcriptional regulators, LysR family                                                 |
| D769_12681      | Transcriptional regulator                                                                        | RBRH_00570 | Citrate/L-malate proton symporter                                                       |
| hutH            | Acyl-coenzyme A synthetases/AMP-(fatty) acid ligases                                             | RBRH_02789 | Histidine ammonia-lyase                                                                 |
| mscL            | Hypothetical protein                                                                             | RBRH_00583 | Large-conductance mechanosensitive channel                                              |
| -               | Dihydroorotate dehydrogenase                                                                     | RBRH_00602 | Dihydropyrimidine dehydrogenase [NADP <sup>+</sup> ] alpha subunit                      |
| RBRH_00570      | Low specificity phosphatase (HAD superfamily)                                                    | RBRH_00570 | Citrate/L-malate proton symporter                                                       |
| -               | Transposase and inactivated derivatives                                                          | RBRH_01902 | Transposase                                                                             |
| -               | Transposase and inactivated derivatives                                                          | RBRH_01838 | Transposase                                                                             |
| ahpC1           | Uncharacterized conserved protein                                                                | RBRH_03492 | Peroxiredoxin                                                                           |
| thiC            | Uncharacterized protein conserved in bacteria                                                    | RBRH_03038 | Thiamine biosynthesis protein thiC                                                      |
| -               | Thiamine biosynthesis protein ThiC                                                               | RBRH_03039 | Osmotically inducible lipoprotein B                                                     |
| C266_24825      | Spermidine/putrescine-binding periplasmic protein                                                | RBRH_00295 | Transcriptional regulators, LysR family                                                 |
| RBRH_00570      | Serine/threonine protein kinase                                                                  | RBRH_00570 | Citrate/L-malate proton symporter                                                       |
| RBRH_00570      | Serine/threonine protein kinase                                                                  | RBRH_00570 | Citrate/L-malate proton symporter                                                       |
| RBRH_00570      | Predicted exonuclease of the beta-lactamase fold involved in RNA processing                      | RBRH_00570 | Citrate/L-malate proton symporter                                                       |
| -               | Hypothetical protein                                                                             | RBRH_00621 | Transposase                                                                             |
| -               | Transposase and inactivated derivatives                                                          | RBRH_00621 | Transposase                                                                             |
| -               | Hypothetical protein                                                                             | RBRH_01691 | Plasmid stability protein stbB                                                          |
| -               | Predicted nucleic acid-binding protein, contains PIN domain                                      | RBRH_01692 | Hypothetical protein                                                                    |
| AXXA_21803      | Exonuclease III                                                                                  | RBRH_00295 | Transcriptional regulators, LysR family                                                 |
| -               | Transposase and inactivated derivatives                                                          | RBRH_00621 | Transposase                                                                             |
| KYC_09711       | ABC-type dipeptide transport system, periplasmic component                                       | RBRH_00295 | Transcriptional regulators, LysR family                                                 |
| -               | Transposase and inactivated derivatives                                                          | RBRH_00621 | Transposase                                                                             |
| BamMC406_2351   | Transposase and inactivated derivatives                                                          | RBRH_00447 | Transposase                                                                             |
| -               | Transposase and inactivated derivatives                                                          | RBRH_00446 | Transposase                                                                             |
| BgramDRAFT_0571 | Threonyl-tRNA synthetase                                                                         | setT       | type III secretion apparatus protein SetT                                               |
| setO            | Type III secretory pathway, component EscT                                                       | setO       | type III secretion protein SetO                                                         |
| -               | Hypothetical protein                                                                             | setN       | type III secretion cytoplasmic ATPase SetN                                              |
| A33K_17794      | Flagellar biosynthesis/type III secretory pathway protein                                        | setK       | type III secretion protein SetK                                                         |
| SG0766          | Uncharacterized integral membrane protein                                                        | RBRH_02783 | Hypothetical cytosolic protein                                                          |
| L810_8411       | Hypothetical protein                                                                             | RBRH_00295 | Transcriptional regulators, LysR family                                                 |
| -               | Hypothetical protein                                                                             | RBRH_04249 | Transposase                                                                             |
| -               | Hypothetical protein                                                                             | RBRH_00446 | Transposase                                                                             |
| BamMC406_2351   | Transposase and inactivated derivatives                                                          | RBRH_00447 | Transposase                                                                             |
| -               | Transposase and inactivated derivatives                                                          | RBRH_01902 | Transposase                                                                             |
| -               | Transposase and inactivated derivatives                                                          | RBRH_01838 | Transposase                                                                             |
| sdhB            | Uncharacterized conserved protein                                                                | RBRH_02777 | Succinate dehydrogenase iron-sulfur protein                                             |
| SG0766          | Uncharacterized conserved protein                                                                | RBRH_02783 | Hypothetical cytosolic protein                                                          |
| -               | Homoserine dehydrogenase                                                                         | RBRH_00570 | Citrate/L-malate proton symporter                                                       |
| SG0735          | ATPases with chaperone activity, ATP-binding subunit                                             | RBRH_02783 | Hypothetical cytosolic protein                                                          |
| -               | Predicted N6-adenine-specific DNA methylase                                                      | RBRH_00491 | Aromatic amino acid transport protein aroP                                              |
| -               | Gamma-aminobutyrate permease and related permeases                                               | RBRH_00422 | Lysine 2,3-aminomutase                                                                  |
| Bcep18194_B0308 | Transcriptional regulator                                                                        | RBRH_00570 | Citrate/L-malate proton symporter                                                       |
| -               | Di- and tricarboxylate transporters                                                              | RBRH_03031 | Cyanide-insensitive cytochrome bd-type quinol oxidase subunit I                         |
| appB            | Cytochrome bd-type quinol oxidase, subunit I                                                     | RBRH_03032 | Cyanide-insensitive cytochrome bd-type quinol oxidase subunit II                        |
| -               | Rhs family protein                                                                               | RBRH_00570 | Citrate/L-malate proton symporter                                                       |
| tcaA2           | Glyceraldehyde-3-phosphate dehydrogenase/erythrose-4-phosphate dehydrogenase                     | RBRH_00596 | Insecticidal toxin complex protein TccA                                                 |
| -               | Preprotein translocase subunit SecF                                                              | RBRH_01897 | MazF protein                                                                            |
| L810_8411       | Undecaprenyl pyrophosphate synthase                                                              | RBRH_00295 | Transcriptional regulators, LysR family                                                 |
| OR16_12515      | Spermidine/putrescine-binding periplasmic protein                                                | RBRH_00295 | Transcriptional regulators, LysR family                                                 |
| -               | Type IV secretory pathway, component VirB8                                                       | RBRH_01929 | Transposase                                                                             |
| C266_09527      | Zn-dependent protease with chaperone function                                                    | RBRH_02758 | Undecaprenyl-phosphate-4-amino-L-arabinose-lipidA 4-amino-L-arabinosyltransferase       |
| <b>pBRH02</b>   |                                                                                                  |            |                                                                                         |
| Dehly_0278      | Retron-type reverse transcriptase                                                                | RBRH_00722 | Transposase                                                                             |
| -               | Transposase and inactivated derivatives                                                          | RBRH_00722 | Transposase                                                                             |
| -               | FOG: HEAT repeat                                                                                 | RBRH_01694 | Reverse transcriptase                                                                   |
| -               | InterPro IPR001584 COGs COG2801                                                                  | RBRH_00630 | Transposase                                                                             |
| istB            | Transposase and inactivated derivatives                                                          | RBRH_04297 | Transposase                                                                             |
| -               | Hypothetical protein                                                                             | RBRH_00722 | Transposase                                                                             |
| -               | Uncharacterized protein conserved in bacteria                                                    | RBRH_00750 | Hypothetical cytosolic protein                                                          |
| RBRH_00570      | Methyl-accepting chemotaxis protein                                                              | RBRH_01258 | Citrate/L-malate proton symporter                                                       |
| -               | Orotidine-5'-phosphate decarboxylase                                                             | RBRH_01258 | Citrate/L-malate proton symporter                                                       |
| tnpA            | Helicase subunit of the DNA excision repair complex                                              | RBRH_00722 | Transposase                                                                             |
| -               | DNA-directed RNA polymerase, sigma subunit (sigma70/sigma32)                                     | RBRH_01252 | Transposase                                                                             |
| -               | Signal transduction histidine kinase                                                             | RBRH_00667 | Unnamed protein product                                                                 |
| tnpA            | Predicted NTPase (NACHT family)                                                                  | RBRH_00685 | Transposase                                                                             |
| -               | Transposase and inactivated derivatives                                                          | RBRH_04292 | Transposase                                                                             |
| -               | Glucose-6-phosphate isomerase                                                                    | RBRH_04292 | Transposase                                                                             |
| -               | Transposase and inactivated derivatives                                                          | RBRH_00685 | Transposase                                                                             |
| RBRH_00570      | DNA polymerase III, alpha subunit                                                                | RBRH_01258 | Citrate/L-malate proton symporter                                                       |
| SG0735          | Uracil-DNA glycosylase                                                                           | RBRH_00687 | Hypothetical cytosolic protein                                                          |
| RBRH_00570      | Phenylpropionate dioxygenase and related ring-hydroxylating dioxygenases, large terminal subunit | RBRH_01258 | Citrate/L-malate proton symporter                                                       |

|                 |                                                                             |            |                                   |
|-----------------|-----------------------------------------------------------------------------|------------|-----------------------------------|
| -               | ABC-type spermidine/putrescine transport systems, ATPase components         | RBRH_01252 | Transposase                       |
| -               | Hypothetical protein                                                        | RBRH_01787 | Hypothetical cytosolic protein    |
| -               | Nucleotidyltransferase/DNA polymerase involved in DNA repair                | RBRH_01786 | DNA polymerase III alpha subunit  |
| SG0735          | Porphobilinogen deaminase                                                   | RBRH_00687 | Hypothetical cytosolic protein    |
| D769_12681      | Transcriptional regulator                                                   | RBRH_01258 | Citrate/L-malate proton symporter |
| -               | Large exoproteins involved in heme utilization or adhesion                  | RBRH_01252 | Transposase                       |
| -               | Hypothetical protein                                                        | RBRH_01252 | Transposase                       |
| RBRH_00570      | Low specificity phosphatase (HAD superfamily)                               | RBRH_01258 | Citrate/L-malate proton symporter |
| -               | Transposase and inactivated derivatives                                     | RBRH_00741 | Transposase                       |
| RBRH_00570      | Serine/threonine protein kinase                                             | RBRH_01258 | Citrate/L-malate proton symporter |
| -               | Uncharacterized protein conserved in bacteria                               | RBRH_00676 | Hypothetical cytosolic protein    |
| -               | Predicted transcriptional regulator                                         | RBRH_00677 | Hypothetical cytosolic protein    |
| RBRH_00570      | Serine/threonine protein kinase                                             | RBRH_01258 | Citrate/L-malate proton symporter |
| RBRH_00570      | Predicted exonuclease of the beta-lactamase fold involved in RNA processing | RBRH_01258 | Citrate/L-malate proton symporter |
| -               | Hypothetical protein                                                        | RBRH_00722 | Transposase                       |
| -               | Transposase and inactivated derivatives                                     | RBRH_00722 | Transposase                       |
| -               | Transposase and inactivated derivatives                                     | RBRH_00722 | Transposase                       |
| -               | Transposase and inactivated derivatives                                     | RBRH_00722 | Transposase                       |
| SG0766          | Uncharacterized integral membrane protein                                   | RBRH_00687 | Hypothetical cytosolic protein    |
| -               | Hypothetical protein                                                        | RBRH_00630 | Transposase                       |
| istB            | Transposase and inactivated derivatives                                     | RBRH_04297 | Transposase                       |
| -               | Transposase and inactivated derivatives                                     | RBRH_00741 | Transposase                       |
| SG0766          | Uncharacterized conserved protein                                           | RBRH_00687 | Hypothetical cytosolic protein    |
| -               | Homoserine dehydrogenase                                                    | RBRH_01258 | Citrate/L-malate proton symporter |
| SG0735          | ATPases with chaperone activity, ATP-binding subunit                        | RBRH_00687 | Hypothetical cytosolic protein    |
| Bcep18194_B0308 | Transcriptional regulator                                                   | RBRH_01258 | Citrate/L-malate proton symporter |
| -               | Preprotein translocase subunit SecF                                         | RBRH_03361 | MazF protein                      |
| -               | UDP-N-acetylmuramate-alanine ligase                                         | RBRH_01252 | Transposase                       |
| -               | Bacterial cell division membrane protein                                    | RBRH_01252 | Transposase                       |
| -               | Type IV secretory pathway, component VirB8                                  | RBRH_00717 | Transposase                       |

**Supplemental Table S2.** Comparison of B1-EB<sup>T</sup>, Mc-AG77, and HKI 454<sup>T</sup> genomes. Specific proteins encoded by genes in the B1-EB<sup>T</sup> genome are colored (legends for the colored rows).

| Genes     | Name              | Annotation                                                                                                | % identity                   |                                          |                               |
|-----------|-------------------|-----------------------------------------------------------------------------------------------------------|------------------------------|------------------------------------------|-------------------------------|
|           |                   |                                                                                                           | B1-EB <sup>T</sup> - Mc-AG77 | B1-EB <sup>T</sup> - HKI454 <sup>T</sup> | Mc-AG77 - HKI454 <sup>T</sup> |
| MCB1EB_1  | dnaA              | ATPase involved in DNA replication initiation                                                             | 99                           | 77                                       | 100                           |
| MCB1EB_2  | dnaN              | DNA polymerase sliding clamp subunit (PCNA homolog)                                                       | 100                          | 76                                       | 100                           |
| MCB1EB_2  | gyrB              | DNA polymerase sliding clamp subunit (PCNA homolog)                                                       | 100                          | 76                                       | 100                           |
| MCB1EB_3  | Sinac_2044        | Type IIA topoisomerase (DNA gyrase/topo II, topoisomerase IV), B subunit                                  | 99                           | 80                                       | 100                           |
| MCB1EB_4  | -                 | Response regulator of citrate/malate metabolism                                                           | -                            | -                                        | -                             |
| MCB1EB_5  | CICLE_v10014636mg | Site-specific recombinases, DNA invertase Pin homologs                                                    | -                            | -                                        | -                             |
| MCB1EB_6  | HCAG_07455        | Hypothetical protein                                                                                      | -                            | -                                        | -                             |
| MCB1EB_7  | -                 | FOG: HEAT repeat                                                                                          | -                            | -                                        | -                             |
| MCB1EB_8  | Dehly_0278        | Retron-type reverse transcriptase                                                                         | -                            | 53                                       | -                             |
| MCB1EB_9  | -                 | Transposase and inactivated derivatives                                                                   | -                            | 27-35                                    | -                             |
| MCB1EB_10 | -                 | Hypothetical protein                                                                                      | 99                           | 81                                       | 93                            |
| MCB1EB_11 | -                 | Proteins containing SET domain                                                                            | 97                           | -                                        | 100                           |
| MCB1EB_12 | -                 | Uncharacterized conserved protein                                                                         | 99                           | 74                                       | 99                            |
| MCB1EB_13 | gidA              | Hypothetical protein                                                                                      | 99                           | 67                                       | 100                           |
| MCB1EB_14 | gidB              | NAD/FAD-utilizing enzyme apparently involved in cell division                                             | 99                           | 80                                       | 98                            |
| MCB1EB_15 | parA2             | Predicted S-adenosylmethionine-dependent methyltransferase involved in bacterial cell division            | 99                           | 59                                       | 97                            |
| MCB1EB_16 | parB2             | ATPases involved in chromosome partitioning                                                               | 100                          | 80                                       | 100                           |
| MCB1EB_17 | -                 | Predicted transcriptional regulators                                                                      | 99                           | 74                                       | 98                            |
| MCB1EB_18 | -                 | Type II secretory pathway, component ExeA (predicted ATPase)                                              | -                            | -                                        | -                             |
| MCB1EB_19 | BamMC406_2351     | Transposase and inactivated derivatives                                                                   | -                            | -                                        | -                             |
| MCB1EB_20 | -                 | Transposase and inactivated derivatives                                                                   | 99                           | 44                                       | 98                            |
| MCB1EB_21 | -                 | Transposase and inactivated derivatives                                                                   | 95                           | 66                                       | -                             |
| MCB1EB_22 | -                 | Transposase and inactivated derivatives                                                                   | -                            | 26-47                                    | -                             |
| MCB1EB_23 | -                 | Transposase and inactivated derivatives                                                                   | 91-100                       | -                                        | -                             |
| MCB1EB_24 | HCAG_07455        | Site-specific recombinases, DNA invertase Pin homologs                                                    | 94                           | -                                        | -                             |
| MCB1EB_25 | N47_100140        | FOG: HEAT repeat                                                                                          | 61-77                        | -                                        | -                             |
| MCB1EB_26 | -                 | Hypothetical protein                                                                                      | -                            | -                                        | -                             |
| MCB1EB_27 | MTR_7g052740      | Transposase and inactivated derivatives                                                                   | -                            | -                                        | -                             |
| MCB1EB_28 | M23134_05452      | Fe-S oxidoreductase                                                                                       | 97                           | -                                        | -                             |
| MCB1EB_29 | HacjB3_01980      | Leucine-rich repeat (LRR) protein                                                                         | 97                           | -                                        | -                             |
| MCB1EB_30 | BURK_029400       | Branched-chain amino acid aminotransferase/4-amino-4-deoxychorismate lyase                                | 94                           | -                                        | -                             |
| MCB1EB_31 | atpFOA            | Hypothetical protein                                                                                      | 99                           | -                                        | -                             |
| MCB1EB_32 | atpFOC            | F0F1-type ATP synthase, subunit a                                                                         | 100                          | 74                                       | 99                            |
| MCB1EB_33 | atpFOB            | F0F1-type ATP synthase, subunit c/Archaeal/vacuolar-type H+-ATPase, subunit K                             | 100                          | 97                                       | 98                            |
| MCB1EB_34 | atpFID            | F0F1-type ATP synthase, subunit b                                                                         | 99                           | 70                                       | 100                           |
| MCB1EB_35 | atpF1A            | F0F1-type ATP synthase, delta subunit (mitochondrial oligomycin sensitivity protein)                      | 99                           | 58                                       | 100                           |
| MCB1EB_36 | atpF1G            | F0F1-type ATP synthase, alpha subunit                                                                     | 100                          | -                                        | -                             |
| MCB1EB_37 | atpF1B            | F0F1-type ATP synthase, gamma subunit                                                                     | 99                           | 79                                       | 100                           |
| MCB1EB_38 | atpC              | F0F1-type ATP synthase, beta subunit                                                                      | 99                           | 94                                       | 100                           |
| MCB1EB_39 | fumC              | Fumarate 1,3-bisphosphate ATP synthase, epsilon subunit (mitochondrial aeta)                              | 100                          | 83                                       | 99                            |
| MCB1EB_40 | hemE              | Fumarase                                                                                                  | 99                           | 82                                       | 98                            |
| MCB1EB_41 | priA              | Uroporphyrinogen-III decarboxylase                                                                        | 99                           | 78                                       | 99                            |
| MCB1EB_42 | putA              | Primosomal protein N' (replication factor Y) - superfamily II helicase                                    | 99                           | -                                        | -                             |
| MCB1EB_43 | -                 | Delta 1-pyrroline-5-carboxylate dehydrogenase                                                             | 99                           | 68                                       | 99                            |
| MCB1EB_44 | CAGGBEG34_210015  | ABC-type branched-chain amino acid transport systems, periplasmic component                               | 99                           | 70                                       | 100                           |
| MCB1EB_45 | PMI16_02037       | Permeases of the drug/metabolite transporter (DMT) superfamily                                            | 99                           | 44-48                                    | -                             |
| MCB1EB_46 | -                 | Predicted Na+-dependent transporter                                                                       | 99                           | 52                                       | 91                            |
| MCB1EB_47 | bioB              | Dioxygenases related to 2-nitropropane dioxygenase                                                        | 99                           | -                                        | -                             |
| MCB1EB_48 | bioD              | Biotin synthase and related enzymes                                                                       | 100                          | 66                                       | 98                            |
| MCB1EB_49 | bioF              | Dethiobiotin synthetase                                                                                   | 100                          | -                                        | -                             |
| MCB1EB_50 | bioA              | 7-keto-8-aminoparalgonate synthetase and related enzymes                                                  | 100                          | -                                        | -                             |
| MCB1EB_51 | mnmC              | Adenosylmethionine-8-amino-7-oxononanoate aminotransferase                                                | 100                          | 73                                       | 99                            |
| MCB1EB_52 | -                 | Uncharacterized conserved protein                                                                         | 100                          | 52                                       | 95                            |
| MCB1EB_53 | -                 | Bacterial nucleoid DNA-binding protein                                                                    | 100                          | 72                                       | 91                            |
| MCB1EB_54 | gspD              | Soluble lytic murein transglycosylase and related regulatory proteins (some contain LysM/invasin domains) | 100                          | -                                        | -                             |
| MCB1EB_55 | gspE              | Type II secretory pathway, component PulD                                                                 | 100                          | 60                                       | 100                           |
| MCB1EB_56 | gspF              | Type II secretory pathway, ATPase PulE/Tfp pilus assembly pathway, ATPase PilB                            | 100                          | 80                                       | 100                           |
| MCB1EB_57 | bglu_1g00350      | Type II secretory pathway, component PulF                                                                 | 100                          | 78                                       | 100                           |
| MCB1EB_58 | gspG              | Hypothetical protein                                                                                      | 98                           | 45                                       | 100                           |
| MCB1EB_59 | BC1003_3493       | Type II secretory pathway, pseudopilin PulG                                                               | 100                          | -                                        | -                             |
| MCB1EB_60 | gspI              | Type II secretory pathway, pseudopilin PulG                                                               | 100                          | 59                                       | 83                            |
| MCB1EB_61 | BC1003_3495       | Type II secretory pathway, pseudopilin PulG                                                               | 90                           | 53                                       | 100                           |
| MCB1EB_62 | Bcep1808_0062     | Type II secretory pathway, component PulJ                                                                 | 100                          | 51                                       | 100                           |
| MCB1EB_63 | Bxe_A4492         | Type II secretory pathway, component PulK                                                                 | 100                          | 49                                       | 97                            |
| MCB1EB_64 | BC1003_3498       | Hypothetical protein                                                                                      | 100                          | 43                                       | 97                            |
| MCB1EB_65 | BC111DRAFT_04780  | Type II secretory pathway, component PulM                                                                 | 100                          | 50                                       | 99                            |
| MCB1EB_66 | -                 | Hypothetical protein                                                                                      | 100                          | 49                                       | 95                            |
| MCB1EB_67 | -                 | Permeases of the major facilitator superfamily                                                            | 100                          | 59                                       | 95                            |
| MCB1EB_68 | C664_08243        | Outer membrane protein                                                                                    | 100                          | 76                                       | 90                            |
| MCB1EB_69 | metF              | Predicted ATPase (AAA+ superfamily)                                                                       | 100                          | -                                        | -                             |
| MCB1EB_70 | ahcY              | 5,10-methylenetetrahydrofolate reductase                                                                  | 100                          | 84                                       | 99                            |
| MCB1EB_71 | -                 | S-adenosylhomocysteine hydrolase                                                                          | 100                          | 85                                       | 97                            |
| MCB1EB_72 | -                 | Amino acid transporters                                                                                   | 100                          | 78                                       | 74                            |
| MCB1EB_73 | -                 | S-adenosylmethionine synthetase                                                                           | 100                          | 63                                       | 100                           |
| MCB1EB_74 | dapF              | Lauroyl/myristoyl acyltransferase                                                                         | 100                          | 71                                       | 92                            |
| MCB1EB_75 | Bphy_0075         | Diaminopimelate epimerase                                                                                 | 100                          | 63                                       | 96                            |
| MCB1EB_76 | xerC              | Uncharacterized protein conserved in bacteria                                                             | 100                          | 45                                       | 97                            |
| MCB1EB_77 | -                 | Site-specific recombinase XerC                                                                            | 100                          | 67                                       | 97                            |
| MCB1EB_78 | -                 | Predicted membrane protein                                                                                | 100                          | 72                                       | 100                           |
| MCB1EB_79 | -                 | Predicted membrane protein                                                                                | 100                          | 76                                       | 95                            |
| MCB1EB_80 | -                 | Uncharacterized proteins, homologs of lactam utilization protein B                                        | 100                          | 66                                       | 97                            |
| MCB1EB_81 | -                 | Allophanate hydrolase subunit 2                                                                           | 100                          | 61                                       | 97                            |
| MCB1EB_82 | CAGGBEG34_20043   | Allophanate hydrolase subunit 1                                                                           | 100                          | 63                                       | 97                            |
| MCB1EB_83 | -                 | 5-formyltetrahydrofolate cyclo-ligase                                                                     | 100                          | 45                                       | 95                            |
| MCB1EB_84 | cca               | Soluble lytic murein transglycosylase and related regulatory proteins (some contain LysM/invasin domains) | 100                          | 57                                       | 96                            |
| MCB1EB_85 | -                 | tRNA nucleotidyltransferase/poly(A) polymerase                                                            | 100                          | 72                                       | 40                            |
| MCB1EB_86 | -                 | Uncharacterized conserved protein                                                                         | 100                          | 62                                       | 100                           |
| MCB1EB_87 | -                 | Dihydroneopterin aldolase                                                                                 | 100                          | 61                                       | 98                            |
| MCB1EB_88 | glmU              | Predicted ATPase of the PP-loop superfamily implicated in cell cycle control                              | 98                           | 80                                       | 92                            |



|            |                   |                                                                                                                             |        |       |     |
|------------|-------------------|-----------------------------------------------------------------------------------------------------------------------------|--------|-------|-----|
| MCB1EB_89  | glmS              | N-acetylglucosamine-1-phosphate uridylyltransferase (contains nucleotidyltransferase and 1-patch acetyltransferase domains) | 100    | 67    | 100 |
| MCB1EB_90  | argC-1            | Glucosamine 6-phosphate synthetase, contains amidotransferase and phosphosugar isomerase domains                            | 100    | 82    | 100 |
| MCB1EB_91  | pyrE              | Acetylglutamate semialdehyde dehydrogenase                                                                                  | 99     | 68    | 99  |
| MCB1EB_92  | maeB              | Orotate phosphoribosyltransferase                                                                                           | 100    | 78    | 99  |
| MCB1EB_93  | -                 | Malic enzyme                                                                                                                | 98-100 | 63-83 | -   |
| MCB1EB_94  | -                 | Hypothetical protein                                                                                                        | 100    | -     | -   |
| MCB1EB_95  | Bpet0683          | Uncharacterized protein conserved in archaea                                                                                | -      | -     | -   |
| MCB1EB_96  | oxyR              | Hypothetical protein                                                                                                        | -      | -     | -   |
| MCB1EB_97  | -                 | Transcriptional regulator                                                                                                   | 100    | 82    | 99  |
| MCB1EB_98  | ubiA              | DNA-binding ferritin-like protein (oxidative damage protectant)                                                             | 100    | -     | -   |
| MCB1EB_99  | PMI40_00445       | 4-hydroxybenzoate polyprenyltransferase and related prenyltransferases                                                      | 100    | 67    | 99  |
| MCB1EB_100 | Bbu156a_Z31       | Hypothetical protein                                                                                                        | 100    | -     | -   |
| MCB1EB_101 | proC              | Hypothetical protein                                                                                                        | -      | -     | -   |
| MCB1EB_102 | -                 | Pyroline-5-carboxylate reductase                                                                                            | 100    | 65    | 96  |
| MCB1EB_103 | aroF              | Predicted enzyme with a TIM-barrel fold                                                                                     | 100    | 68    | 97  |
| MCB1EB_104 | tdlD              | 3-deoxy-D-arabino-heptulosonate 7-phosphate (DAHP) synthase                                                                 | 100    | 81    | 100 |
| MCB1EB_105 | Bxe_A3970         | Predicted Zn-dependent proteases and their inactivated homologs                                                             | 100    | 78    | 100 |
| MCB1EB_106 | glmE              | Predicted membrane protein                                                                                                  | 98     | 37    | 98  |
| MCB1EB_107 | recN              | Glutamine synthetase adenylyltransferase                                                                                    | 100    | 63    | 99  |
| MCB1EB_108 | ppnK              | ATPase involved in DNA repair                                                                                               | 100    | 68    | 100 |
| MCB1EB_109 | hrcA              | Predicted sugar kinase                                                                                                      | 100    | 72    | 89  |
| MCB1EB_110 | -                 | Transcriptional regulator of heat shock gene                                                                                | 100    | 82    | 100 |
| MCB1EB_111 | hemH              | Hypothetical protein                                                                                                        | 28     | -     | -   |
| MCB1EB_112 | grpE              | Protoheme ferro-lyase (ferrochelatase)                                                                                      | 100    | 65    | 99  |
| MCB1EB_113 | dnaK              | Molecular chaperone GrpE (heat shock protein)                                                                               | 100    | -     | -   |
| MCB1EB_114 | dnaJ              | Molecular chaperone                                                                                                         | 100    | 78    | 100 |
| MCB1EB_115 | BC1001_0454       | DnaJ-class molecular chaperone with C-terminal Zn finger domain                                                             | 100    | 77    | 100 |
| MCB1EB_116 | SMUL_0469         | Anthranyl/para-aminobenzoate synthases component I                                                                          | 100    | 53    | 99  |
| MCB1EB_117 | -                 | Isoleucyl-tRNA synthetase                                                                                                   | 100    | -     | -   |
| MCB1EB_118 | -                 | Topoisomerase IA                                                                                                            | -      | 38    | -   |
| MCB1EB_119 | HCAg_07455        | Plasmid stabilization system protein                                                                                        | -      | 54    | -   |
| MCB1EB_120 | CAOG_00447        | Hypothetical protein                                                                                                        | -      | -     | -   |
| MCB1EB_121 | PBF_15929         | DNA segregation ATPase FtsK/SpoIIIE and related proteins                                                                    | -      | -     | -   |
| MCB1EB_122 | TSTA_111040       | DnaJ-class molecular chaperone                                                                                              | -      | -     | -   |
| MCB1EB_123 | -                 | FOG: HEAT repeat                                                                                                            | -      | -     | -   |
| MCB1EB_124 | -                 | Retron-type reverse transcriptase                                                                                           | -      | 60    | -   |
| MCB1EB_125 | HNWD1             | Uncharacterized protein conserved in bacteria                                                                               | -      | -     | -   |
| MCB1EB_126 | F750_6439         | Predicted NTPase (NACHT family)                                                                                             | -      | -     | -   |
| MCB1EB_127 | FGSG_13479        | Predicted NTPase (NACHT family)                                                                                             | 92     | -     | -   |
| MCB1EB_128 | N234_15805        | FOG: HEAT repeat                                                                                                            | 68-81  | -     | -   |
| MCB1EB_129 | Bcep1808_2462     | Transposase and inactivated derivatives                                                                                     | -      | -     | -   |
| MCB1EB_130 | ACD_45C00610G0002 | Hypothetical protein                                                                                                        | -      | -     | -   |
| MCB1EB_131 | K788_3283         | Hypothetical protein                                                                                                        | -      | -     | -   |
| MCB1EB_132 | Rpic12D_3451      | Uncharacterized protein conserved in bacteria                                                                               | -      | -     | -   |
| MCB1EB_133 | Bphy_1935         | Hypothetical protein                                                                                                        | -      | -     | -   |
| MCB1EB_134 | RSce1870          | Predicted transcriptional regulator                                                                                         | -      | -     | -   |
| MCB1EB_135 | -                 | Hypothetical protein                                                                                                        | -      | -     | -   |
| MCB1EB_136 | cinA              | Integrase                                                                                                                   | 97     | -     | -   |
| MCB1EB_137 | -                 | Uncharacterized protein (competence- and mitomycin-induced)                                                                 | 100    | 75    | 99  |
| MCB1EB_138 | thiL              | Phosphatidylglycerophosphatase A and related proteins                                                                       | -      | 60    | -   |
| MCB1EB_139 | maeB              | Thiamine monophosphate kinase                                                                                               | -      | 61    | -   |
| MCB1EB_140 | -                 | Malic enzyme                                                                                                                | 98-100 | 82    | -   |
| MCB1EB_141 | -                 | Hypothetical protein                                                                                                        | 100    | 61    | 95  |
| MCB1EB_142 | -                 | Uncharacterized protein conserved in bacteria                                                                               | 100    | 61    | 98  |
| MCB1EB_143 | nth               | Hypothetical protein                                                                                                        | 100    | 68    | 100 |
| MCB1EB_144 | rnfB              | Predicted EndoII-related endonuclease                                                                                       | 100    | 84    | 93  |
| MCB1EB_145 | -                 | Predicted NADH:ubiquinone oxidoreductase, subunit RnfB                                                                      | 100    | -     | -   |
| MCB1EB_146 | -                 | 3-polyprenyl-4-hydroxybenzoate decarboxylase and related decarboxylases                                                     | 100    | 79    | 98  |
| MCB1EB_147 | nusB              | Soluble lytic murein transglycosylase and related regulatory proteins (some contain LysM/invasin domains)                   | 83     | -     | -   |
| MCB1EB_148 | ribH              | Transcription termination factor                                                                                            | 100    | -     | -   |
| MCB1EB_149 | ribA              | Riboflavin synthase beta-chain                                                                                              | 100    | 73    | 90  |
| MCB1EB_150 | ribE              | 3,4-dihydroxy-2-butanone 4-phosphate synthase                                                                               | 100    | 75    | 98  |
| MCB1EB_151 | ribD              | Riboflavin synthase alpha chain                                                                                             | 100    | 65    | 98  |
| MCB1EB_152 | hemL              | Pyrimidine reductase, riboflavin biosynthesis                                                                               | 100    | 71    | 96  |
| MCB1EB_153 | -                 | Glutamate-1-semialdehyde aminotransferase                                                                                   | 100    | 75    | 100 |
| MCB1EB_154 | -                 | ABC-type histidine transport system, ATPase component                                                                       | 100    | 79    | 100 |
| MCB1EB_155 | -                 | ABC-type arginine/histidine transport system, permease component                                                            | 100    | -     | -   |
| MCB1EB_156 | -                 | ABC-type arginine transport system, permease component                                                                      | 100    | 76    | 100 |
| MCB1EB_157 | ssuC              | ABC-type amino acid transport/signal transduction systems, periplasmic component/domain                                     | 100    | 70    | 99  |
| MCB1EB_158 | -                 | ABC-type anion transport system, duplicated permease component                                                              | 94     | -     | -   |
| MCB1EB_159 | alaS              | ABC-type nitrate/sulfonate/bicarbonate transport system, ATPase component                                                   | 100    | 56    | 99  |
| MCB1EB_160 | sirA              | Alanyl-tRNA synthetase                                                                                                      | 97     | 82    | 97  |
| MCB1EB_161 | -                 | Predicted redox protein, regulator of disulfide bond formation                                                              | 100    | 73    | 95  |
| MCB1EB_162 | valS              | UDP-glucose pyrophosphorylase                                                                                               | 100    | 79    | 98  |
| MCB1EB_163 | -                 | Valyl-tRNA synthetase                                                                                                       | 100    | 82    | 99  |
| MCB1EB_164 | argA              | Fe-S cluster protector protein                                                                                              | 100    | 84    | 100 |
| MCB1EB_165 | hrpA              | Acetylglutamate kinase                                                                                                      | 100    | 75    | 100 |
| MCB1EB_166 | -                 | HrpA-like helicases                                                                                                         | 100    | 68    | 97  |
| MCB1EB_167 | N9414_23838       | Transcriptional regulator                                                                                                   | 100    | 79    | 97  |
| MCB1EB_168 | MldDRAFT_4528     | Hypothetical protein                                                                                                        | 100    | -     | -   |
| MCB1EB_169 | pyrD              | Hypothetical protein                                                                                                        | 100    | -     | -   |
| MCB1EB_170 | -                 | Dihydroorotate dehydrogenase                                                                                                | 100    | 77    | 94  |
| MCB1EB_171 | aat               | ADP-ribose pyrophosphatase                                                                                                  | 100    | 72    | 98  |
| MCB1EB_172 | -                 | Leu/Phe-tRNA-protein transferase                                                                                            | 100    | 67    | 98  |
| MCB1EB_173 | -                 | Single-stranded DNA-binding protein                                                                                         | 100    | 58    | 100 |
| MCB1EB_174 | uvrA              | Permeases of the major facilitator superfamily                                                                              | 100    | 65    | 96  |
| MCB1EB_175 | CAGGBEG34_50005   | Excinuclease ATPase subunit                                                                                                 | 100    | 83    | 99  |
| MCB1EB_176 | HBHAL_1466        | Predicted permease                                                                                                          | 100    | 52    | 94  |
| MCB1EB_177 | dsat_1931         | Methyl-accepting chemotaxis protein                                                                                         | 100    | -     | -   |
| MCB1EB_178 | SsaD              | Predicted hydrolases or acyltransferases (alpha/beta hydrolase superfamily)                                                 | 100    | -     | -   |
| MCB1EB_179 | BN873_490019      | Hypothetical protein                                                                                                        | 100    | -     | -   |
| MCB1EB_180 | escC              | 5-enolpyruvylshikimate-3-phosphate synthase                                                                                 | 100    | -     | -   |
| MCB1EB_181 | CAGGBEG34_210108  | Type II secretory pathway, component PulD                                                                                   | 100    | -     | -   |
| MCB1EB_182 | SsaH              | Predicted Fe-S oxidoreductase                                                                                               | 100    | -     | -   |
| MCB1EB_183 | CAGGBEG34_210106  | Hypothetical protein                                                                                                        | 100    | -     | -   |
| MCB1EB_184 | ssaJ              | Peptide chain release factor RF-3                                                                                           | 100    | -     | -   |

|            |                   |                                                                                             |     |       |     |
|------------|-------------------|---------------------------------------------------------------------------------------------|-----|-------|-----|
| MCB1EB_185 | CAGGBEG34_210103  | Type III secretory pathway, lipoprotein EscJ                                                | 100 | -     | -   |
| MCB1EB_186 | SsaK              | Hypothetical protein                                                                        | 88  | -     | -   |
| MCB1EB_187 | -                 | Hypothetical protein                                                                        | 100 | -     | -   |
| MCB1EB_188 | flil              | Type III secretory pathway, component EscV                                                  | 100 | -     | -   |
| MCB1EB_189 | CAGGBEG34_210094  | Flagellar biosynthesis/type III secretory pathway ATPase                                    | 100 | -     | -   |
| MCB1EB_190 | CAGGBEG34_210093  | Hypothetical protein                                                                        | 100 | -     | -   |
| MCB1EB_191 | PscQ              | Phenylalanyl-tRNA synthetase beta subunit                                                   | 100 | -     | -   |
| MCB1EB_192 | escR              | Flagellar motor switch/type III secretory pathway protein                                   | 100 | -     | -   |
| MCB1EB_193 | SsaS              | Type III secretory pathway, component EscR                                                  | 100 | -     | -   |
| MCB1EB_194 | escT              | Type III secretory pathway, component EscS                                                  | 100 | -     | -   |
| MCB1EB_195 | SsaU              | Type III secretory pathway, component EscT                                                  | 100 | -     | -   |
| MCB1EB_196 | GS101S_33_00230   | Type III secretory pathway, component EscU                                                  | 100 | -     | -   |
| MCB1EB_197 | -                 | Transcriptional regulators of sugar metabolism                                              | 83  | -     | -   |
| MCB1EB_198 | ETSY1_29215       | Transposase and inactivated derivatives                                                     | -   | -     | -   |
| MCB1EB_199 | -                 | Cation transport ATPase                                                                     | -   | -     | -   |
| MCB1EB_200 | HMPREF1541_09163  | Hypothetical protein                                                                        | -   | -     | -   |
| MCB1EB_201 | PMI35_05042       | Hypothetical protein                                                                        | 100 | -     | -   |
| MCB1EB_202 | BURK_027400       | Transcriptional regulators                                                                  | 100 | -     | -   |
| MCB1EB_203 | K788_6823         | Transcriptional regulator                                                                   | 100 | -     | -   |
| MCB1EB_204 | RSc3174           | Hypothetical protein                                                                        | 98  | 44    | 91  |
| MCB1EB_205 | secA              | Hypothetical protein                                                                        | 100 | -     | -   |
| MCB1EB_206 | argJ              | Preprotein translocase subunit SecA (ATPase, RNA helicase)                                  | 100 | 78    | 100 |
| MCB1EB_207 | -                 | N-acetylglutamate synthase (N-acetylornithine aminotransferase)                             | 100 | 71    | 100 |
| MCB1EB_208 | mutF              | Predicted ATPase (AAA+ superfamily)                                                         | 100 | 79    | 99  |
| MCB1EB_209 | yacG              | NTP pyrophosphohydrolases including oxidative damage repair enzymes                         | 100 | 74    | 91  |
| MCB1EB_210 | -                 | Uncharacterized protein conserved in bacteria                                               | 100 | 57    | 90  |
| MCB1EB_211 | coaE              | Uncharacterized protein conserved in bacteria                                               | 100 | 76    | 99  |
| MCB1EB_212 | -                 | Dephospho-CoA kinase                                                                        | 100 | 58    | 98  |
| MCB1EB_213 | pilC              | Type II secretory pathway, prepilin signal peptidase PuO and related peptidases             | 100 | 50    | 97  |
| MCB1EB_214 | -                 | Type II secretory pathway, component PulF                                                   | 100 | 42    | 96  |
| MCB1EB_215 | -                 | Type II secretory pathway, ATPase PulE/Tip pilus assembly pathway, ATPase PilB              | 100 | 58    | 87  |
| MCB1EB_216 | ispB              | Putative Mg <sup>2+</sup> and Co <sup>2+</sup> transporter CorB                             | 100 | 69    | 98  |
| MCB1EB_217 | -                 | Geranylgeranyl pyrophosphate synthase                                                       | 100 | 75    | 100 |
| MCB1EB_218 | tufA              | Predicted membrane protein                                                                  | 86  | 70    | 97  |
| MCB1EB_219 | secE              | GTPases - translation elongation factors                                                    | 100 | 89    | 100 |
| MCB1EB_220 | nusG              | Preprotein translocase subunit SecE                                                         | 87  | 63    | 100 |
| MCB1EB_221 | rplK              | Transcription antiterminator                                                                | 100 | 90    | 100 |
| MCB1EB_222 | rplA              | Ribosomal protein L11                                                                       | 100 | -     | -   |
| MCB1EB_223 | rplJ              | Ribosomal protein L1                                                                        | 100 | 85    | 100 |
| MCB1EB_224 | rplL              | Ribosomal protein L10                                                                       | 100 | 77    | 93  |
| MCB1EB_225 | rpoB              | Ribosomal protein L7/L12                                                                    | 100 | 87    | 100 |
| MCB1EB_226 | rpoC              | DNA-directed RNA polymerase, beta subunit/140 kD subunit                                    | 100 | -     | -   |
| MCB1EB_227 | CAGGBEG34_190142  | DNA-directed RNA polymerase, beta' subunit/160 kD subunit                                   | 100 | 89    | 100 |
| MCB1EB_228 | recQ              | Hypothetical protein                                                                        | -   | 33    | -   |
| MCB1EB_229 | rpsL              | Superfamily II DNA helicase                                                                 | 100 | 74    | 100 |
| MCB1EB_230 | rpsG              | Ribosomal protein S12                                                                       | 100 | -     | -   |
| MCB1EB_231 | fusA1             | Ribosomal protein S7                                                                        | 100 | 88    | 100 |
| MCB1EB_232 | rpsJ              | Translation elongation factors (GTPases)                                                    | 100 | 81-87 | 100 |
| MCB1EB_233 | rplC              | Ribosomal protein S10                                                                       | 100 | 76    | 98  |
| MCB1EB_234 | rplD              | Ribosomal protein L3                                                                        | 100 | 73    | 100 |
| MCB1EB_235 | rplW              | Ribosomal protein L4                                                                        | 100 | 85    | 100 |
| MCB1EB_236 | rplB              | Ribosomal protein L23                                                                       | 100 | 69    | 100 |
| MCB1EB_237 | rpsS              | Ribosomal protein L2                                                                        | 100 | 85    | 100 |
| MCB1EB_238 | rplV              | Ribosomal protein S19                                                                       | 100 | 86    | 100 |
| MCB1EB_239 | rpsC              | Ribosomal protein L22                                                                       | 100 | 82    | 100 |
| MCB1EB_240 | rplP              | Ribosomal protein S3                                                                        | 100 | 89    | 85  |
| MCB1EB_241 | rpmC              | Ribosomal protein L16/L10E                                                                  | 99  | 95    | 100 |
| MCB1EB_242 | rpsQ              | Ribosomal protein L29                                                                       | 100 | 75    | 100 |
| MCB1EB_243 | -                 | Ribosomal protein S17                                                                       | 100 | 83    | 100 |
| MCB1EB_244 | rplX              | Ribosomal protein L14                                                                       | 100 | 89    | 81  |
| MCB1EB_245 | rplE              | Ribosomal protein L24                                                                       | 99  | 75    | 100 |
| MCB1EB_246 | rpsN              | Ribosomal protein L5                                                                        | 100 | 84    | 100 |
| MCB1EB_247 | rpsH              | Ribosomal protein S14                                                                       | 100 | 89    | 83  |
| MCB1EB_248 | rplF              | Ribosomal protein S8                                                                        | 100 | 82    | 100 |
| MCB1EB_249 | rplR              | Ribosomal protein L6P/L9E                                                                   | 100 | -     | -   |
| MCB1EB_250 | rpsE              | Ribosomal protein L18                                                                       | 100 | 83    | 100 |
| MCB1EB_251 | rpmD              | Ribosomal protein S5                                                                        | 100 | 81    | 99  |
| MCB1EB_252 | rplO              | Ribosomal protein L30/L7E                                                                   | 100 | 82    | 100 |
| MCB1EB_253 | secY              | Ribosomal protein L15                                                                       | 100 | 77    | 99  |
| MCB1EB_254 | infA              | Preprotein translocase subunit SecY                                                         | 100 | 87    | 100 |
| MCB1EB_255 | rpsM              | Translation initiation factor 1 (IF-1)                                                      | 100 | 94    | 100 |
| MCB1EB_256 | rpsK              | Ribosomal protein S13                                                                       | 100 | 74    | 100 |
| MCB1EB_257 | rpsD              | Ribosomal protein S11                                                                       | 100 | 84    | 100 |
| MCB1EB_258 | rpoA              | Ribosomal protein S4 and related proteins                                                   | 100 | 84    | 100 |
| MCB1EB_259 | rplQ              | DNA-directed RNA polymerase, alpha subunit/40 kD subunit                                    | 100 | 87    | 100 |
| MCB1EB_260 | BamMEXSDRAFT_2889 | Ribosomal protein L17                                                                       | 100 | 78    | 93  |
| MCB1EB_261 | hemB              | Thiol:disulfide interchange protein                                                         | 100 | 43    | 100 |
| MCB1EB_262 | CAGGBEG34_190142  | Delta-aminolevulinic acid dehydratase                                                       | 100 | 77    | 99  |
| MCB1EB_263 | engB              | Hypothetical protein                                                                        | 100 | 33    | 83  |
| MCB1EB_264 | -                 | Predicted GTPase                                                                            | 100 | 71    | 98  |
| MCB1EB_265 | DOK_03213         | Cytochrome c553                                                                             | 100 | 55    | 86  |
| MCB1EB_266 | -                 | Hypothetical protein                                                                        | 100 | -     | -   |
| MCB1EB_267 | -                 | ResB protein required for cytochrome c biosynthesis                                         | 97  | 61    | 97  |
| MCB1EB_268 | NFKB1             | ABC-type transport system involved in cytochrome c biogenesis, permease component           | 100 | 74    | 91  |
| MCB1EB_269 | lysA              | FOG: Ankyrin repeat                                                                         | 100 | -     | -   |
| MCB1EB_270 | cyaY              | Diaminopimelate decarboxylase                                                               | 100 | 72    | 99  |
| MCB1EB_271 | -                 | Protein implicated in iron transport, frataxin homolog                                      | 100 | 56    | 94  |
| MCB1EB_272 | BY123_A024070     | Membrane carboxypeptidase/penicillin-binding protein                                        | 100 | 66-68 | -   |
| MCB1EB_273 | CAGGBEG34_210075  | Tip pilus assembly protein, ATPase PilM                                                     | 100 | 34    | 99  |
| MCB1EB_274 | -                 | Tip pilus assembly protein PilP                                                             | 100 | -     | -   |
| MCB1EB_275 | aroK              | Type II secretory pathway, component HofQ                                                   | 100 | -     | -   |
| MCB1EB_276 | aroB              | Shikimate kinase                                                                            | 100 | 70    | 99  |
| MCB1EB_277 | dgt               | 3-dehydroquinate synthetase                                                                 | 100 | 69    | 97  |
| MCB1EB_278 | PMI06_006043      | dGTP triphosphohydrolase                                                                    | 100 | 77    | 99  |
| MCB1EB_279 | -                 | Outer membrane protein W                                                                    | 100 | 46    | 100 |
| MCB1EB_280 | -                 | ABC-type transport system involved in resistance to organic solvents, ATPase component      | 100 | 77    | 96  |
| MCB1EB_281 | -                 | ABC-type transport system involved in resistance to organic solvents, permease component    | 100 | 84    | 100 |
| MCB1EB_282 | -                 | ABC-type transport system involved in resistance to organic solvents, periplasmic component | 100 | 77    | 90  |
| MCB1EB_283 | BURK_006002       | Surface lipoprotein                                                                         | 100 | -     | -   |

|            |                  |                                                                                           |        |       |     |
|------------|------------------|-------------------------------------------------------------------------------------------|--------|-------|-----|
| MCB1EB_284 | -                | ABC-type transport system involved in resistance to organic solvents, auxiliary component | 100    | 56    | 94  |
| MCB1EB_285 | -                | Predicted NTP binding protein (contains STAS domain)                                      | 100    | 47    | 99  |
| MCB1EB_286 | -                | ABC-type multidrug transport system, ATPase component                                     | 67     | 75    | 99  |
| MCB1EB_287 | murA             | ABC-type multidrug transport system, permease component                                   | 100    | 74    | 100 |
| MCB1EB_288 | hisG             | UDP-N-acetylglucosamine enolpyruvyl transferase                                           | 100    | 74    | 99  |
| MCB1EB_289 | hisD             | ATP phosphoribosyltransferase                                                             | 100    | 82    | 96  |
| MCB1EB_290 | hisC             | Histidinol dehydrogenase                                                                  | 100    | 75    | 100 |
| MCB1EB_291 | hisB             | Histidinol-phosphate/aromatic aminotransferase and coberic acid decarboxylase             | 100    | 69    | 99  |
| MCB1EB_292 | hisH             | Imidazoleglycerol-phosphate dehydratase                                                   | 100    | 64    | 97  |
| MCB1EB_293 | hisA             | Glutamine amidotransferase                                                                | 100    | 72    | 100 |
| MCB1EB_294 | hisF             | Phosphoribosylformimino-5-aminoimidazole carboxamide ribonucleotide (ProFAR) isomerase    | 82     | 64    | 100 |
| MCB1EB_295 | hisI             | Imidazoleglycerol-phosphate synthase                                                      | 81     | 78    | 93  |
| MCB1EB_296 | hisE             | Phosphoribosyl-AMP cyclohydrolase                                                         | 100    | 71    | 94  |
| MCB1EB_297 | C266_22308       | Phosphoribosyl-ATP pyrophosphatase                                                        | 100    | -     | -   |
| MCB1EB_298 | -                | Predicted membrane protein                                                                | 100    | -     | 88  |
| MCB1EB_299 | tatA             | Diadenosine tetraphosphate (Ap4A) hydrolase and other HIT family hydrolases               | 100    | 73    | 100 |
| MCB1EB_300 | tatB             | Sec-independent protein secretion pathway components                                      | 100    | 58    | 98  |
| MCB1EB_301 | tatC             | Sec-independent protein secretion pathway components                                      | 100    | 48    | 99  |
| MCB1EB_302 | -                | Sec-independent protein secretion pathway component TatC                                  | 100    | 70    | 99  |
| MCB1EB_303 | -                | Trypsin-like serine proteases, typically periplasmic, contain C-terminal PDZ domain       | 100    | 77    | 99  |
| MCB1EB_304 | -                | Uncharacterized conserved protein                                                         | 100    | 73    | 100 |
| MCB1EB_305 | petB             | Rieske Fe-S protein                                                                       | 100    | 74    | 100 |
| MCB1EB_306 | -                | Cytochrome b subunit of the bc complex                                                    | 100    | 78    | 97  |
| MCB1EB_307 | sspA             | Cytochrome c1                                                                             | 100    | 63    | 92  |
| MCB1EB_308 | -                | Glutathione S-transferase                                                                 | 100    | 90    | 100 |
| MCB1EB_309 | SM8_04219        | Stringent starvation protein B                                                            | 100    | -     | -   |
| MCB1EB_310 | DacsA_3325       | FOG: TPR repeat                                                                           | 100    | -     | -   |
| MCB1EB_311 | LYNGBM3L_24300   | Hypothetical protein                                                                      | 100    | -     | -   |
| MCB1EB_312 | CAGGBEG34_190029 | Predicted NTPase (NACHT family)                                                           | 66-91  | -     | -   |
| MCB1EB_313 | HNWD1            | Hypothetical protein                                                                      | -      | -     | -   |
| MCB1EB_314 | CAGGBEG34_330054 | Predicted NTPase (NACHT family)                                                           | 78-96  | -     | -   |
| MCB1EB_315 | RoseRS_4025      | Transposase and inactivated derivatives                                                   | -      | -     | -   |
| MCB1EB_316 | -                | Predicted NTPase (NACHT family)                                                           | 66-91  | -     | -   |
| MCB1EB_317 | -                | Transposase and inactivated derivatives                                                   | -      | -     | -   |
| MCB1EB_318 | istB             | Transposase and inactivated derivatives                                                   | 100    | 65    | -   |
| MCB1EB_319 | istA             | DNA replication protein                                                                   | -      | 56    | -   |
| MCB1EB_320 | -                | Transposase and inactivated derivatives                                                   | -      | -     | -   |
| MCB1EB_321 | -                | InterPro IPR001584 COGs COG2801                                                           | -      | -     | -   |
| MCB1EB_322 | istB             | Transposase and inactivated derivatives                                                   | -      | 54-55 | -   |
| MCB1EB_323 | BCh11DRAFT_03152 | DNA replication protein                                                                   | -      | 66    | -   |
| MCB1EB_324 | -                | NAD-dependent aldehyde dehydrogenases                                                     | -      | -     | -   |
| MCB1EB_325 | istA             | Transposase and inactivated derivatives                                                   | -      | 62    | -   |
| MCB1EB_326 | Npun_F1419       | Transposase and inactivated derivatives                                                   | -      | -     | -   |
| MCB1EB_327 | HMPREF9711_02659 | Predicted NTPase (NACHT family)                                                           | -      | -     | -   |
| MCB1EB_328 | RoseRS_4025      | Orotidine-5'-phosphate decarboxylase                                                      | -      | -     | -   |
| MCB1EB_329 | CAGGBEG34_330054 | Predicted NTPase (NACHT family)                                                           | 66-91  | -     | -   |
| MCB1EB_330 | -                | Hypothetical protein                                                                      | -      | -     | -   |
| MCB1EB_331 | CARN7_2937       | DNA replication protein                                                                   | -      | -     | -   |
| MCB1EB_332 | -                | Transposase and inactivated derivatives                                                   | -      | -     | -   |
| MCB1EB_333 | BN683_02092      | Transposase and inactivated derivatives                                                   | -      | -     | -   |
| MCB1EB_334 | -                | Hypothetical protein                                                                      | -      | -     | -   |
| MCB1EB_335 | -                | Transposase and inactivated derivatives                                                   | 34-100 | 27    | -   |
| MCB1EB_336 | -                | Transposase and inactivated derivatives                                                   | 91-100 | -     | -   |
| MCB1EB_337 | HMPREF1487_04394 | Transposase and inactivated derivatives                                                   | 100    | -     | -   |
| MCB1EB_338 | LHK_00908        | Integrase                                                                                 | -      | -     | -   |
| MCB1EB_339 | BN508_00740      | Integrase                                                                                 | -      | -     | -   |
| MCB1EB_340 | -                | Transcriptional regulators                                                                | 89     | -     | -   |
| MCB1EB_341 | ubiH             | Predicted GTPase, probable translation factor                                             | 99     | 82    | 100 |
| MCB1EB_342 | -                | 2-polyprenyl-6-methoxyphenol hydroxylase and related FAD-dependent oxidoreductases        | 100    | 64    | 99  |
| MCB1EB_343 | SG1089           | Predicted protease with the C-terminal PDZ domain                                         | 100    | 67    | 100 |
| MCB1EB_344 | ung              | Hypothetical protein                                                                      | 100    | 38    | -   |
| MCB1EB_345 | -                | Uracil DNA glycosylase                                                                    | 100    | -     | -   |
| MCB1EB_346 | trpD             | Indole-3-glycerol phosphate synthase                                                      | 100    | 65    | 100 |
| MCB1EB_347 | trpG             | Anthranilate phosphoribosyltransferase                                                    | 100    | 75    | 100 |
| MCB1EB_348 | trpE             | Anthranilate/para-aminobenzoate synthases component II                                    | 100    | 73    | 99  |
| MCB1EB_349 | rpe              | Anthranilate/para-aminobenzoate synthases component I                                     | 100    | 79    | 100 |
| MCB1EB_350 | apaG             | Pentose-5-phosphate-3-epimerase                                                           | 100    | 82    | 98  |
| MCB1EB_351 | mltA             | Uncharacterized protein affecting Mg <sup>2+</sup> /Co <sup>2+</sup> transport            | 100    | 77    | 100 |
| MCB1EB_352 | -                | Membrane-bound lytic murein transglycosylase                                              | 85     | -     | 93  |
| MCB1EB_353 | -                | Hypothetical protein                                                                      | 100    | -     | -   |
| MCB1EB_354 | Bpet0683         | Uncharacterized protein conserved in archaea                                              | -      | -     | -   |
| MCB1EB_355 | BCh11DRAFT_04003 | Hypothetical protein                                                                      | -      | -     | -   |
| MCB1EB_356 | ubiB             | Uncharacterized protein conserved in bacteria                                             | 80     | -     | 94  |
| MCB1EB_357 | -                | Predicted unusual protein kinase                                                          | 100    | 76    | 100 |
| MCB1EB_358 | -                | Uncharacterized protein conserved in bacteria                                             | 100    | -     | -   |
| MCB1EB_359 | aspS             | Uncharacterized conserved protein                                                         | 98     | 79    | 94  |
| MCB1EB_360 | ntpA             | Aspartyl-tRNA synthetase                                                                  | 100    | 82    | 100 |
| MCB1EB_361 | -                | NTP pyrophosphorylases including oxidative damage repair                                  | 100    | 70    | 94  |
| MCB1EB_362 | THITH_00215      | Acyl-CoA dehydrogenases                                                                   | 100    | 81    | 100 |
| MCB1EB_363 | fadB             | Hypothetical protein                                                                      | -      | -     | -   |
| MCB1EB_364 | fadA             | 3-hydroxyacyl-CoA dehydrogenase                                                           | 100    | -     | -   |
| MCB1EB_365 | -                | Acetyl-CoA acetyltransferase                                                              | 100    | 78    | 100 |
| MCB1EB_366 | gdhA             | Acyl-CoA hydrolase                                                                        | 100    | 73    | 98  |
| MCB1EB_367 | -                | Glutamate dehydrogenase/leucine dehydrogenase                                             | 100    | 85    | 99  |
| MCB1EB_368 | glj              | ABC-type amino acid transport/signal transduction systems, periplasmic component/domain   | 100    | 72    | 92  |
| MCB1EB_369 | -                | ABC-type amino acid transport system, permease component                                  | 100    | 76    | 100 |
| MCB1EB_370 | -                | ABC-type amino acid transport system, permease component                                  | 100    | 74    | 100 |
| MCB1EB_371 | argD             | ABC-type polar amino acid transport system, ATPase component                              | 100    | 87    | 100 |
| MCB1EB_372 | ascD             | Ornithine/acetylornithine aminotransferase                                                | 100    | 74    | 100 |
| MCB1EB_373 | BCh11DRAFT_05379 | 2-polyprenylphenol hydroxylase and related flavodoxin oxidoreductases                     | 100    | 73    | 100 |
| MCB1EB_374 | -                | Nucleoside-diphosphate-sugar epimerases                                                   | 100    | 58    | 61  |
| MCB1EB_375 | -                | Glutaredoxin-related protein                                                              | 100    | 76    | 100 |
| MCB1EB_376 | -                | 3-polyprenyl-4-hydroxybenzoate decarboxylase                                              | 100    | 66    | 92  |
| MCB1EB_377 | RSK60_1520072    | Amino acid transporters                                                                   | 100    | -     | -   |
| MCB1EB_378 | BRAD1G69720      | SEC7 domain proteins                                                                      | 100    | -     | -   |
| MCB1EB_379 | MC7420_7550      | DNA polymerase III, alpha subunit                                                         | -      | -     | -   |
| MCB1EB_380 | CAGGBEG34_330054 | Predicted NTPase (NACHT family)                                                           | -      | -     | -   |
| MCB1EB_381 | Mic7113_0456     | Methyl-accepting chemotaxis protein                                                       | -      | -     | -   |

|            |                     |                                                                                                            |        |       |     |
|------------|---------------------|------------------------------------------------------------------------------------------------------------|--------|-------|-----|
| MCB1EB_382 | matK                | Predicted NTPase (NACHT family)                                                                            | 66-91  | -     | -   |
| MCB1EB_383 | HNWD1               | Retron-type reverse transcriptase                                                                          | -      | -     | -   |
| MCB1EB_384 | Npun_F1419          | Predicted NTPase (NACHT family)                                                                            | 66-91  | -     | -   |
| MCB1EB_385 | wzxE                | Predicted NTPase (NACHT family)                                                                            | 66-91  | -     | -   |
| MCB1EB_386 | Thi970DRAFT_00599   | Membrane protein involved in the export of O-antigen and teichoic acid                                     | 94     | -     | -   |
| MCB1EB_387 | -                   | Thiol-disulfide isomerase and thioredoxins                                                                 | -      | -     | -   |
| MCB1EB_388 | Cyan7822_2631       | Transposase and inactivated derivatives                                                                    | -      | -     | -   |
| MCB1EB_389 | Cyan7822_2631       | Predicted NTPase (NACHT family)                                                                            | 78-96  | -     | -   |
| MCB1EB_390 | CAGGBEG34_330054    | Predicted NTPase (NACHT family)                                                                            | 78-96  | -     | -   |
| MCB1EB_391 | CAGGBEG34_220024    | Hypothetical protein                                                                                       | -      | -     | -   |
| MCB1EB_392 | -                   | Phosphotransferase system IIC components, glucose/maltose/N-acetylglucosamine-specific                     | -      | 54    | -   |
| MCB1EB_393 | -                   | Transposase and inactivated derivatives                                                                    | 100    | -     | -   |
| MCB1EB_394 | CARN7_2937          | Transposase and inactivated derivatives                                                                    | 100    | 65    | -   |
| MCB1EB_395 | -                   | Transposase and inactivated derivatives                                                                    | -      | -     | -   |
| MCB1EB_396 | CAGGBEG34_420004    | DNA replication protein                                                                                    | -      | -     | -   |
| MCB1EB_397 | Neut_1498           | Hypothetical protein                                                                                       | 97     | -     | -   |
| MCB1EB_398 | ANA_C12029          | Integrase                                                                                                  | 100    | 25    | 97  |
| MCB1EB_399 | CAGGBEG34_330054    | Predicted NTPase (NACHT family)                                                                            | -      | -     | -   |
| MCB1EB_400 | ACD_44C00098G0001   | Hypothetical protein                                                                                       | -      | -     | -   |
| MCB1EB_401 | CAGGBEG34_330054    | Predicted NTPase (NACHT family)                                                                            | -      | -     | -   |
| MCB1EB_402 | CAGGBEG34_220024    | Hypothetical protein                                                                                       | -      | -     | -   |
| MCB1EB_403 | -                   | Permeases of the major facilitator superfamily                                                             | -      | 54    | -   |
| MCB1EB_404 | SFV_0255            | Hypothetical protein                                                                                       | 100    | 72    | -   |
| MCB1EB_405 | L682_09965          | Hypothetical protein                                                                                       | -      | -     | -   |
| MCB1EB_406 | L682_09960          | Hypothetical protein                                                                                       | 100    | -     | -   |
| MCB1EB_407 | L682_09955          | Hypothetical protein                                                                                       | 100    | -     | 96  |
| MCB1EB_408 | L682_09950          | Uncharacterized homolog of phage Mu protein gp47                                                           | -      | 26    | -   |
| MCB1EB_409 | L682_09945          | Hypothetical protein                                                                                       | -      | -     | -   |
| MCB1EB_410 | HIB_15810           | Hypothetical protein                                                                                       | -      | 28    | -   |
| MCB1EB_411 | -                   | Hypothetical protein                                                                                       | 100    | 25    | -   |
| MCB1EB_412 | -                   | Uncharacterized protein conserved in bacteria                                                              | -      | -     | -   |
| MCB1EB_413 | L682_09935          | Predicted transcriptional regulator                                                                        | -      | 42-48 | -   |
| MCB1EB_414 | HMPREF9095_1683     | Hypothetical protein                                                                                       | -      | -     | -   |
| MCB1EB_415 | BC1002_6556         | Hypothetical protein                                                                                       | -      | -     | -   |
| MCB1EB_416 | -                   | Hypothetical protein                                                                                       | -      | 22    | -   |
| MCB1EB_417 | L682_09915          | Hypothetical protein                                                                                       | -      | -     | -   |
| MCB1EB_418 | B398_05775          | Hypothetical protein                                                                                       | -      | -     | -   |
| MCB1EB_419 | L682_09905          | Hypothetical protein                                                                                       | -      | -     | -   |
| MCB1EB_420 | BC1002_6552         | Hypothetical protein                                                                                       | 100    | 21    | -   |
| MCB1EB_421 | PD_0974             | Hypothetical protein                                                                                       | -      | -     | -   |
| MCB1EB_422 | gene0107            | Hypothetical protein                                                                                       | -      | -     | -   |
| MCB1EB_423 | BC1002_6549         | Hypothetical protein                                                                                       | -      | -     | -   |
| MCB1EB_424 | BC1002_6547         | Hypothetical protein                                                                                       | -      | -     | -   |
| MCB1EB_425 | XF_1576             | Uncharacterized protein conserved in bacteria                                                              | 100    | -     | -   |
| MCB1EB_426 | BC1002_6545         | Hypothetical protein                                                                                       | 96     | -     | -   |
| MCB1EB_427 | XFEF_01759          | Uncharacterized protein conserved in bacteria                                                              | 100    | -     | -   |
| MCB1EB_428 | BC1002_6543         | Uncharacterized protein, homolog of phage Mu protein gp30                                                  | 100    | 30    | -   |
| MCB1EB_429 | -                   | Uncharacterized protein conserved in bacteria                                                              | 100    | -     | -   |
| MCB1EB_430 | PA2G_00805          | Uncharacterized protein conserved in bacteria                                                              | 96-100 | 32    | -   |
| MCB1EB_431 | HMPREF0005_02877    | Glycosyltransferase                                                                                        | -      | -     | -   |
| MCB1EB_432 | CAGGBEG34_330022    | Hypothetical protein                                                                                       | 97     | -     | -   |
| MCB1EB_433 | CAGGBEG34_330013    | Pyruvate-formate lyase-activating enzyme                                                                   | -      | -     | -   |
| MCB1EB_434 | C75L2_00370035      | Acyl-CoA dehydrogenases                                                                                    | -      | -     | -   |
| MCB1EB_435 | Shewm7_3068         | Hypothetical protein                                                                                       | -      | -     | -   |
| MCB1EB_436 | HMPREF9701_05463    | FOG: Ankyrin repeat                                                                                        | -      | -     | -   |
| MCB1EB_437 | Alide_1665          | Hypothetical protein                                                                                       | -      | -     | -   |
| MCB1EB_438 | O991_02545          | ABC-type multidrug transport system, permease component                                                    | -      | -     | -   |
| MCB1EB_439 | NH8B_1955           | Phosphatidylinositol kinase and protein kinases of the PI-3 kinase family                                  | -      | -     | -   |
| MCB1EB_440 | Halhy_5407          | Predicted transcriptional regulator                                                                        | -      | -     | -   |
| MCB1EB_441 | Veis_0670           | Predicted membrane protein                                                                                 | -      | -     | -   |
| MCB1EB_442 | D623_10006357       | Hypothetical protein                                                                                       | -      | -     | -   |
| MCB1EB_443 | ST1_0045            | cAMP-binding proteins - catabolite gene activator and regulatory subunit of cAMP-dependent protein kinases | 100    | -     | -   |
| MCB1EB_444 | CAGGBEG34_190021    | Hypothetical protein                                                                                       | 100    | -     | -   |
| MCB1EB_445 | -                   | Phage-related protein, predicted endonuclease                                                              | -      | -     | -   |
| MCB1EB_446 | BDB_30064           | Recombinational DNA repair protein (RecE pathway)                                                          | -      | -     | -   |
| MCB1EB_447 | CAGGBEG34_610004    | ATPase involved in DNA repair                                                                              | -      | -     | -   |
| MCB1EB_448 | RBRH_00570          | Methyl-accepting chemotaxis protein                                                                        | -      | 42    | -   |
| MCB1EB_449 | PGSC0003DMG40001771 | Na <sup>+</sup> /citrate symporter                                                                         | 99-100 | 49-53 | -   |
| MCB1EB_450 | B738_22335          | FKBP-type peptidyl-prolyl cis-trans isomerases 2                                                           | 100    | -     | -   |
| MCB1EB_451 | CAGGBEG34_420004    | Hypothetical protein                                                                                       | 100    | -     | -   |
| MCB1EB_452 | -                   | Hypothetical protein                                                                                       | -      | -     | -   |
| MCB1EB_453 | -                   | Integrase                                                                                                  | -      | 30    | -   |
| MCB1EB_454 | -                   | Ferredoxin                                                                                                 | 100    | 85    | 100 |
| MCB1EB_455 | -                   | Na <sup>+</sup> /H <sup>+</sup> antiporter NhaD and related arsenite permeases                             | 100    | 66    | 98  |
| MCB1EB_456 | -                   | Uncharacterized protein conserved in bacteria                                                              | 97     | 72    | 93  |
| MCB1EB_457 | -                   | Hypothetical protein                                                                                       | 100    | 64    | 100 |
| MCB1EB_458 | -                   | Co/Zn/Cd efflux system component                                                                           | 100    | -     | -   |
| MCB1EB_459 | prfA                | Methylase of polypeptide chain release factors                                                             | 100    | 59    | 100 |
| MCB1EB_460 | -                   | Protein chain release factor A                                                                             | 100    | 82    | 99  |
| MCB1EB_461 | bcp                 | Predicted ATPase related to phosphate starvation-inducible protein                                         | 100    | 76    | 100 |
| MCB1EB_462 | -                   | Peroxisome oxidin                                                                                          | 100    | 67    | 98  |
| MCB1EB_463 | -                   | Predicted xylanase/chitin deacetylase                                                                      | 100    | 75    | 100 |
| MCB1EB_464 | pmrfa               | Nucleoside-diphosphate-sugar epimerases                                                                    | 100    | 84    | 99  |
| MCB1EB_465 | pmrF                | Methionyl-tRNA formyltransferase                                                                           | 100    | 70    | 100 |
| MCB1EB_466 | pmrH                | Glycosyltransferases involved in cell wall biogenesis                                                      | 100    | 80    | 96  |
| MCB1EB_467 | -                   | Predicted pyridoxal phosphate-dependent enzyme apparently involved in regulation of cell wall biogenesis   | 100    | 74    | 98  |
| MCB1EB_468 | LOTGDRAFT_118875    | Permeases of the drug/metabolite transporter (DMT) superfamily                                             | 100    | 77    | 99  |
| MCB1EB_469 | ROI_15060           | Hypothetical protein                                                                                       | 99     | -     | -   |
| MCB1EB_470 | ATXN3               | Phosphatidylserine/phosphatidylglycerophosphate/cardioliipin synthases and related enzymes                 | 93     | -     | -   |
| MCB1EB_471 | amT                 | Spermidine/putrescine-binding periplasmic protein                                                          | 100    | -     | -   |
| MCB1EB_472 | -                   | 4-amino-4-deoxy-L-arabinose transferase and related glycosyltransferases of PMT family                     | 100    | 64    | 95  |
| MCB1EB_473 | -                   | Uncharacterized conserved protein                                                                          | -      | -     | -   |
| MCB1EB_474 | pyrF                | Aspartate/tyrosine/aromatic aminotransferase                                                               | 100    | 75    | 99  |
| MCB1EB_475 | -                   | Orotidine-5'-phosphate decarboxylase                                                                       | 99     | 76    | 98  |
| MCB1EB_476 | C265_18829          | Na <sup>+</sup> /citrate symporter                                                                         | 88-99  | 54-56 | -   |
| MCB1EB_477 | BN113_0351          | Transcriptional regulator                                                                                  | 100    | 31    | 97  |
| MCB1EB_478 | -                   | Transcriptional regulator                                                                                  | 100    | 27    | -   |
| MCB1EB_479 | -                   | Permeases of the major facilitator superfamily                                                             | 100    | -     | -   |
| MCB1EB_480 | parE                | ATPase components of ABC transporters with duplicated ATPase domains                                       | 100    | 71    | 100 |

|            |                   |                                                                                                                        |       |       |     |
|------------|-------------------|------------------------------------------------------------------------------------------------------------------------|-------|-------|-----|
| MCB1EB_481 | LACBIDRAFT_297160 | Type IIA topoisomerase (DNA gyrase/topo II, topoisomerase IV), B subunit                                               | 100   | 83    | 100 |
| MCB1EB_482 | IGC_05496         | Serine phosphatase RsbU, regulator of sigma subunit                                                                    | -     | -     | -   |
| MCB1EB_483 | parC              | Hypothetical protein                                                                                                   | 100   | -     | -   |
| MCB1EB_484 | FMAG_00195        | Type IIA topoisomerase (DNA gyrase/topo II, topoisomerase IV), A subunit                                               | -     | -     | -   |
| MCB1EB_485 | parC              | ATPase related to the helicase subunit of the Holliday junction                                                        | -     | -     | -   |
| MCB1EB_486 | aspC              | Type IIA topoisomerase (DNA gyrase/topo II, topoisomerase IV), A subunit                                               | 100   | 77    | 100 |
| MCB1EB_487 | -                 | Aspartate/tyrosine/aromatic aminotransferase                                                                           | 100   | 75    | 99  |
| MCB1EB_488 | tmpA              | Helicase subunit of the DNA excision repair complex                                                                    | 100   | 83    | 98  |
| MCB1EB_489 | kdsB              | Transposase and inactivated derivatives                                                                                | 96    | 35-36 | -   |
| MCB1EB_490 | HMPREF9710_00354  | CMP-2-keto-3-deoxyoctulosonic acid synthetase                                                                          | -     | -     | -   |
| MCB1EB_491 | RBRH_00986        | Predicted sugar phosphate isomerase involved in capsule formation                                                      | -     | -     | -   |
| MCB1EB_492 | greB              | Permeases of the drug/metabolic transporter (DMT) superfamily                                                          | -     | 59    | -   |
| MCB1EB_493 | spoT              | Transcription elongation factor                                                                                        | 100   | 64    | 98  |
| MCB1EB_494 | rpoZ              | Guanosine polyphosphate pyrophosphohydrolases/synthetases                                                              | 100   | 77    | 99  |
| MCB1EB_495 | gmk               | DNA-directed RNA polymerase, subunit K/omega                                                                           | 100   | 64    | 100 |
| MCB1EB_496 | -                 | Guanylate kinase                                                                                                       | 100   | 72    | 90  |
| MCB1EB_497 | rph               | Uncharacterized stress-induced protein                                                                                 | 100   | -     | -   |
| MCB1EB_498 | -                 | RNase PH                                                                                                               | 100   | 71    | 98  |
| MCB1EB_499 | hemN              | Xanthosine triphosphate pyrophosphatase                                                                                | 100   | 65    | 90  |
| MCB1EB_500 | -                 | Coproporphyrinogen III oxidase and related Fe-S oxidoreductases                                                        | 100   | 71    | 97  |
| MCB1EB_501 | Piso0_004142      | Integrase                                                                                                              | -     | -     | -   |
| MCB1EB_502 | Bml_43535         | ABC-type sugar transport system, periplasmic component                                                                 | 100   | -     | -   |
| MCB1EB_503 | taA               | Hypothetical protein                                                                                                   | -     | -     | -   |
| MCB1EB_504 | -                 | Transaldolase                                                                                                          | 100   | 68    | 100 |
| MCB1EB_505 | surE              | Protein involved in catabolism of external DNA                                                                         | 100   | 63    | 99  |
| MCB1EB_506 | -                 | Predicted acid phosphatase                                                                                             | 100   | 75    | 100 |
| MCB1EB_507 | -                 | Protein-L-isoaspartate carboxylmethyltransferase                                                                       | 100   | 62    | 99  |
| MCB1EB_508 | -                 | Membrane proteins related to metalloendopeptidases                                                                     | 85    | 65    | 97  |
| MCB1EB_509 | -                 | DNA-directed RNA polymerase, sigma subunit (sigma70/sigma32)                                                           | -     | -     | -   |
| MCB1EB_510 | rpoS              | Transposase and inactivated derivatives, IS5 family                                                                    | -     | 82    | -   |
| MCB1EB_511 | -                 | DNA-directed RNA polymerase, sigma subunit (sigma70/sigma32)                                                           | -     | -     | -   |
| MCB1EB_512 | TRIAIDRAFT_285415 | Predicted 3'-5' exonuclease related to the exonuclease domain of PolB                                                  | 100   | 74    | 100 |
| MCB1EB_513 | groES             | Integrase                                                                                                              | -     | -     | -   |
| MCB1EB_514 | groEL             | Co-chaperonin GroES (HSP10)                                                                                            | 100   | 85    | 96  |
| MCB1EB_515 | -                 | Chaperonin GroEL (HSP60 family)                                                                                        | 100   | 87    | 96  |
| MCB1EB_516 | -                 | Rubredoxin                                                                                                             | 100   | 93    | 100 |
| MCB1EB_517 | yqqF              | Putative transcriptional regulator                                                                                     | 100   | 77    | 87  |
| MCB1EB_518 | -                 | Predicted endonuclease involved in recombination (possible Holliday junction resolvase in Mycoplasmas and B. subtilis) | 100   | 65    | 93  |
| MCB1EB_519 | pyrB              | Pyrimidine operon attenuation protein/uracil phosphoribosyltransferase                                                 | 100   | 69    | 93  |
| MCB1EB_520 | pyrC              | Aspartate carbamoyltransferase, catalytic chain                                                                        | 100   | 83    | 98  |
| MCB1EB_521 | K788_7818         | Dihydroorotase and related cyclic amidohydrolases                                                                      | 100   | 73    | 100 |
| MCB1EB_522 | apaH              | 1-acyl-sn-glycerol-3-phosphate acyltransferase                                                                         | 100   | 56    | 93  |
| MCB1EB_523 | SRU_1425          | Diadenosine tetraphosphate and related serine/threonine protein phosphatases                                           | -     | -     | -   |
| MCB1EB_524 | -                 | Hydrogenase maturation factor                                                                                          | -     | -     | -   |
| MCB1EB_525 | polC              | Hypothetical protein                                                                                                   | -     | -     | -   |
| MCB1EB_526 | -                 | Hypothetical protein                                                                                                   | -     | -     | -   |
| MCB1EB_527 | BCE_G9241_2121    | Transposase and inactivated derivatives, IS5 family                                                                    | -     | -     | -   |
| MCB1EB_528 | CLOHYLEM_04803    | ABC-type nitrate/sulfonate/bicarbonate transport systems, periplasmic components                                       | -     | -     | -   |
| MCB1EB_529 | secA              | Hypothetical protein                                                                                                   | -     | -     | -   |
| MCB1EB_530 | Anacy_0920        | Hypothetical protein                                                                                                   | -     | -     | -   |
| MCB1EB_531 | LDG_7312          | FOG: Ankyrin repeat                                                                                                    | -     | -     | -   |
| MCB1EB_532 | rfbB              | Preprotein translocase subunit SecA (ATPase, RNA helicase)                                                             | -     | -     | -   |
| MCB1EB_533 | -                 | dTDP-D-glucose 4,6-dehydratase                                                                                         | -     | -     | -   |
| MCB1EB_534 | rfbC              | dTDP-glucose pyrophosphorylase                                                                                         | 100   | -     | -   |
| MCB1EB_535 | CAGGBEG34_200100  | dTDP-4-dehydroharnnose 3,5-epimerase and related enzymes                                                               | -     | -     | -   |
| MCB1EB_536 | -                 | Uncharacterized protein conserved in bacteria                                                                          | 100   | 47    | 78  |
| MCB1EB_537 | A11_06320         | Uncharacterized protein SCO1/SenC/PrnC, involved in biogenesis of respiratory and photosynthetic systems               | 100   | 54    | 100 |
| MCB1EB_538 | -                 | Arylsulfatase A and related enzymes                                                                                    | 100   | -     | -   |
| MCB1EB_539 | -                 | ABC-type multidrug transport system, ATPase and permease components                                                    | 100   | 74    | 81  |
| MCB1EB_540 | -                 | Glycosyltransferase                                                                                                    | 100   | 79    | 100 |
| MCB1EB_541 | -                 | Uncharacterized protein probably involved in high-affinity Fe2+ transport                                              | 100   | 72    | 96  |
| MCB1EB_542 | -                 | Hypothetical protein                                                                                                   | 100   | -     | -   |
| MCB1EB_543 | -                 | High-affinity Fe2+/Pb2+ permease                                                                                       | 100   | 66    | 99  |
| MCB1EB_544 | -                 | Polyferredoxin                                                                                                         | 100   | 69    | 98  |
| MCB1EB_545 | -                 | Membrane-fusion protein                                                                                                | 100   | 64    | 90  |
| MCB1EB_546 | -                 | Cation/multidrug efflux pump                                                                                           | 100   | 74    | 99  |
| MCB1EB_547 | MARPU_13085       | Outer membrane protein                                                                                                 | 100   | 64    | 99  |
| MCB1EB_548 | Agau_P200259      | Uncharacterized protein related to capsule biosynthesis enzymes                                                        | 100   | -     | -   |
| MCB1EB_549 | -                 | Predicted transcriptional regulators                                                                                   | 100   | -     | -   |
| MCB1EB_550 | -                 | ABC-type Mn2+/Zn2+ transport systems, permease components                                                              | 100   | 77    | 100 |
| MCB1EB_551 | -                 | ABC-type Mn/Zn transport systems, ATPase component                                                                     | 100   | 69    | 95  |
| MCB1EB_552 | Bxe_A3912         | ABC-type metal ion transport system, periplasmic component/surface adhesin                                             | 100   | 61    | 84  |
| MCB1EB_553 | CAGGBEG34_200018  | Tfp pilus assembly protein FimT                                                                                        | 100   | -     | -   |
| MCB1EB_554 | CAGGBEG34_200017  | Tfp pilus assembly protein PilV                                                                                        | 100   | -     | -   |
| MCB1EB_555 | CAGGBEG34_200016  | Tfp pilus assembly protein PilW                                                                                        | 100   | 36    | 90  |
| MCB1EB_556 | CAGGBEG34_200015  | Tfp pilus assembly protein PilX                                                                                        | 100   | -     | -   |
| MCB1EB_557 | Bamb_0690         | Tfp pilus assembly protein PilE                                                                                        | 100   | -     | -   |
| MCB1EB_558 | Bcep1808_0746     | Methyl-accepting chemotaxis protein                                                                                    | 100   | -     | -   |
| MCB1EB_559 | -                 | Predicted membrane protein                                                                                             | 100   | 52    | 99  |
| MCB1EB_560 | abcT4             | Uncharacterized conserved protein                                                                                      | 100   | 75    | 100 |
| MCB1EB_561 | mstA              | ABC-type multidrug transport system, ATPase and permease components                                                    | 100   | -     | -   |
| MCB1EB_562 | Hally_2265        | Peptide methionine sulfoxide reductase                                                                                 | 100   | 62    | 97  |
| MCB1EB_563 | Cyan7822_4279     | Predicted NTPase (NACHT family)                                                                                        | 78-96 | -     | -   |
| MCB1EB_564 | pdxH              | FOG: HEAT repeat                                                                                                       | -     | -     | -   |
| MCB1EB_565 | glnS              | Pyridoxamine-phosphate oxidase                                                                                         | 100   | 64    | 99  |
| MCB1EB_566 | HA1_08492         | Glutamyl- and glutamyl-IRNA synthetases                                                                                | 100   | 78    | 99  |
| MCB1EB_567 | -                 | Predicted NTPase (NACHT family)                                                                                        | 100   | -     | -   |
| MCB1EB_568 | kdsC              | Predicted sugar phosphate isomerase involved in capsule formation                                                      | 100   | 71    | 100 |
| MCB1EB_569 | MYA_2549          | Low specificity phosphatase (HAD superfamily)                                                                          | 100   | 61    | 92  |
| MCB1EB_570 | Bphyt_0598        | Uncharacterized protein conserved in bacteria                                                                          | 100   | 59    | 90  |
| MCB1EB_571 | -                 | Uncharacterized protein conserved in bacteria                                                                          | 100   | 48    | 88  |
| MCB1EB_572 | -                 | ABC-type (unclassified) transport system, ATPase component                                                             | 100   | 80    | 100 |
| MCB1EB_573 | ptsN              | Ribosome-associated protein Y (PSrp-1)                                                                                 | 100   | -     | -   |
| MCB1EB_574 | hprK              | Phosphotransferase system mannitol/fructose-specific IIA domain (Ntr-type)                                             | 100   | 77    | 96  |
| MCB1EB_575 | -                 | Serine kinase of the HPr protein, regulates carbohydrate metabolism                                                    | 100   | 86    | 98  |
| MCB1EB_576 | Aasi_1766         | Predicted P-loop-containing kinase                                                                                     | 100   | 70    | 99  |
| MCB1EB_577 | O166_23020        | Predicted alternative thymidylate synthase                                                                             | 100   | -     | -   |

|            |                  |                                                                                                           |        |    |     |
|------------|------------------|-----------------------------------------------------------------------------------------------------------|--------|----|-----|
| MCB1EB_578 | RBRH_00033       | Hypothetical protein                                                                                      | -      | -  | -   |
| MCB1EB_579 | RBRH_00029       | Glycerophosphoryl diester phosphodiesterase                                                               | -      | -  | -   |
| MCB1EB_580 | A33K_15832       | Hypothetical protein                                                                                      | 100    | 70 | 78  |
| MCB1EB_581 | A33K_15831       | Hypothetical protein                                                                                      | 100    | -  | -   |
| MCB1EB_582 | CV_2589          | Hypothetical protein                                                                                      | 100    | -  | -   |
| MCB1EB_583 | ssaJ             | Hypothetical protein                                                                                      | 100    | -  | -   |
| MCB1EB_584 | BTI_1930         | Type III secretory pathway, lipoprotein EscJ                                                              | 100    | -  | -   |
| MCB1EB_585 | CV_2586          | Hypothetical protein                                                                                      | 100    | -  | -   |
| MCB1EB_586 | eprI             | Hypothetical protein                                                                                      | 100    | -  | -   |
| MCB1EB_587 | A33K_15825       | Hypothetical protein                                                                                      | 100    | -  | -   |
| MCB1EB_588 | CV_2581          | AraC-type DNA-binding domain-containing proteins                                                          | 94     | -  | -   |
| MCB1EB_589 | A33K_15824       | Acyl-CoA dehydrogenases                                                                                   | 100    | -  | -   |
| MCB1EB_590 | BTI_1937         | Hypothetical protein                                                                                      | 99     | -  | -   |
| MCB1EB_591 | A33K_15820       | FOG: TPR repeat                                                                                           | 100    | -  | -   |
| MCB1EB_592 | BTI_1939         | Uncharacterized conserved protein                                                                         | 100    | -  | -   |
| MCB1EB_593 | BTI_1940         | Cobalamin biosynthesis protein CobN and related Mg-chelatases                                             | 100    | -  | -   |
| MCB1EB_594 | BTI_1907         | Hypothetical protein                                                                                      | 92     | -  | -   |
| MCB1EB_595 | escU             | Soluble lytic murein transglycosylase and related regulatory proteins (some contain LysM/invasin domains) | 90     | -  | -   |
| MCB1EB_596 | escT             | Type III secretory pathway, component EscU                                                                | 99     | -  | -   |
| MCB1EB_597 | ssaS             | Type III secretory pathway, component EscT                                                                | 100    | -  | -   |
| MCB1EB_598 | epaP             | Type III secretory pathway, component EscS                                                                | 100    | -  | -   |
| MCB1EB_599 | PTE_02619        | Type III secretory pathway, component EscR                                                                | 100    | -  | -   |
| MCB1EB_600 | epaO             | Uncharacterized ABC-type transport system, periplasmic component/surface lipoprotein                      | -      | -  | -   |
| MCB1EB_601 | CV_2605          | Flagellar motor switch/type III secretory pathway protein                                                 | 100    | -  | -   |
| MCB1EB_602 | CV_2604          | 3-phosphoglycerate kinase                                                                                 | 100    | -  | -   |
| MCB1EB_603 | -                | Flagellar hook protein FlgE                                                                               | 100    | -  | -   |
| MCB1EB_604 | escV             | Flagellar biosynthesis/type III secretory pathway ATPase                                                  | 100    | -  | -   |
| MCB1EB_605 | ssaM             | Type III secretory pathway, component EscV                                                                | 98-100 | -  | -   |
| MCB1EB_606 | BTI_1918         | Hypothetical protein                                                                                      | 100    | -  | -   |
| MCB1EB_607 | -                | Signal transduction histidine kinase                                                                      | 98     | -  | -   |
| MCB1EB_608 | CV_2598          | Response regulator containing a CheY-like receiver domain and an HTH DNA-binding domain                   | 100    | 28 | 96  |
| MCB1EB_609 | escC             | ABC-type sugar transport system, ATPase component                                                         | -      | -  | -   |
| MCB1EB_610 | CV_2596          | Type II secretory pathway, component PulD                                                                 | 100    | -  | -   |
| MCB1EB_611 | CV_2595          | Hypothetical protein                                                                                      | 100    | -  | -   |
| MCB1EB_612 | -                | Hexokinase                                                                                                | 100    | -  | -   |
| MCB1EB_613 | -                | Cytochrome c553                                                                                           | 100    | 58 | 100 |
| MCB1EB_614 | hemA             | Cytochrome c553                                                                                           | 100    | 64 | 84  |
| MCB1EB_615 | -                | Glutaryl-tRNA reductase                                                                                   | 100    | 73 | 98  |
| MCB1EB_616 | CAGGBEG34_380006 | Xaa-Pro aminopeptidase                                                                                    | 100    | 65 | 98  |
| MCB1EB_617 | CAGGBEG34_380007 | Hypothetical protein                                                                                      | 100    | -  | -   |
| MCB1EB_618 | HDN1F_23160      | Hypothetical protein                                                                                      | 99     | -  | -   |
| MCB1EB_619 | M622_15490       | Predicted hydrolases or acyltransferases (alpha/beta hydrolase superfamily)                               | 84     | -  | -   |
| MCB1EB_620 | MIM_c07780       | Predicted hydrolase (metallo-beta-lactamase superfamily)                                                  | 28     | -  | -   |
| MCB1EB_621 | -                | Hypothetical protein                                                                                      | 100    | -  | -   |
| MCB1EB_622 | CAGGBEG34_240007 | Transposase and inactivated derivatives                                                                   | 100    | -  | -   |
| MCB1EB_623 | -                | Response regulator containing a CheY-like receiver domain and an HTH DNA-binding domain                   | 100    | 55 | 77  |
| MCB1EB_624 | -                | Hypothetical protein                                                                                      | 100    | 64 | 100 |
| MCB1EB_625 | rhuC             | Ribonucleases G and E                                                                                     | 100    | 76 | -   |
| MCB1EB_626 | SG1089           | Pseudouridylyl synthases, 23S RNA-specific                                                                | 100    | 64 | -   |
| MCB1EB_627 | -                | Hypothetical protein                                                                                      | 100    | -  | 99  |
| MCB1EB_628 | -                | Periplasmic serine proteases (ClpP class)                                                                 | 100    | 59 | 95  |
| MCB1EB_629 | -                | Predicted methyltransferases                                                                              | 100    | 68 | 99  |
| MCB1EB_630 | A33K_14804       | Nucleotide-binding protein implicated in inhibition of septum formation                                   | 100    | -  | -   |
| MCB1EB_631 | RoseRS_4025      | Predicted metal-binding, possibly nucleic acid-binding protein                                            | 100    | -  | -   |
| MCB1EB_632 | PVAR5_8935       | Predicted NTPase (NACHT family)                                                                           | 78-96  | -  | -   |
| MCB1EB_633 | rpmF             | Hypothetical protein                                                                                      | -      | -  | -   |
| MCB1EB_634 | plsX             | Ribosomal protein L32                                                                                     | 100    | 78 | 100 |
| MCB1EB_635 | fabH1            | Fatty acid/phospholipid biosynthesis enzyme                                                               | 100    | 77 | 87  |
| MCB1EB_636 | fabD             | 3-oxoacyl-[acyl-carrier-protein] synthase III                                                             | 100    | 75 | 100 |
| MCB1EB_637 | fabG             | (acyl-carrier-protein) S-malonyltransferase                                                               | 100    | 72 | 100 |
| MCB1EB_638 | acpP             | Dehydrogenases with different specificities (related to short-chain alcohol dehydrogenases)               | 100    | 74 | 100 |
| MCB1EB_639 | fabF1            | Acyl carrier protein                                                                                      | 100    | -  | -   |
| MCB1EB_640 | BCh11DRAFT_05733 | 3-oxoacyl-(acyl-carrier-protein) synthase                                                                 | 100    | 79 | 100 |
| MCB1EB_641 | rpoE1            | Uncharacterized protein conserved in bacteria                                                             | 100    | -  | -   |
| MCB1EB_642 | -                | DNA-directed RNA polymerase specialized sigma subunit, sigma24 homolog                                    | 100    | 75 | 100 |
| MCB1EB_643 | Cal6303_2739     | Trypsin-like serine proteases, typically periplasmic, contain C-terminal PDZ domain                       | 100    | 65 | 91  |
| MCB1EB_644 | -                | Predicted NTPase (NACHT family)                                                                           | 66-91  | -  | -   |
| MCB1EB_645 | pagP             | Transposase and inactivated derivatives                                                                   | 100    | 65 | -   |
| MCB1EB_646 | Centrod_0254     | Hypothetical protein                                                                                      | 100    | -  | -   |
| MCB1EB_647 | HNWD1            | Predicted NTPase (NACHT family)                                                                           | 99-100 | -  | -   |
| MCB1EB_648 | lepA             | Predicted NTPase (NACHT family)                                                                           | 66-91  | -  | -   |
| MCB1EB_649 | spaS             | Membrane GTPase LepA                                                                                      | 100    | 87 | 96  |
| MCB1EB_650 | mc               | Signal peptidase I                                                                                        | 100    | 66 | 100 |
| MCB1EB_651 | era              | dsRNA-specific ribonuclease                                                                               | 91     | -  | -   |
| MCB1EB_652 | recO             | GTPase                                                                                                    | 100    | 71 | 99  |
| MCB1EB_653 | pdxJ             | Recombinational DNA repair protein (RecF pathway)                                                         | 100    | 69 | 90  |
| MCB1EB_654 | acpS             | Pyridoxal phosphate biosynthesis protein                                                                  | 100    | 72 | 95  |
| MCB1EB_655 | nagZ             | Phosphopantetheinyl transferase (holo-ACP synthase)                                                       | 100    | -  | -   |
| MCB1EB_656 | eifP             | Beta-glucosidase-related glycosidases                                                                     | 96     | 64 | 95  |
| MCB1EB_657 | Bxe_A1094        | Translation elongation factor P (EF-P)/translation initiation factor 5A (eIF-5A)                          | 100    | 87 | 100 |
| MCB1EB_658 | B1144G04.29      | Uncharacterized protein conserved in bacteria                                                             | 100    | 53 | 99  |
| MCB1EB_659 | TRIADDRAFT_62950 | Biotin-(acetyl-CoA carboxylase) ligase                                                                    | -      | -  | -   |
| MCB1EB_660 | uvrC             | Glutamate synthase domain 2                                                                               | -      | -  | -   |
| MCB1EB_661 | pgsA             | Nuclease subunit of the excinuclease complex                                                              | 100    | 75 | 96  |
| MCB1EB_662 | -                | Phosphatidylglycerophosphate synthase                                                                     | 100    | 78 | 96  |
| MCB1EB_663 | CAGGBEG34_320030 | ATPase components of ABC transporters with duplicated ATPase domains                                      | 100    | 80 | 100 |
| MCB1EB_664 | Cal6303_2739     | Transposase and inactivated derivatives                                                                   | -      | -  | -   |
| MCB1EB_665 | Dmoj/G111313     | Predicted NTPase (NACHT family)                                                                           | 66-91  | -  | -   |
| MCB1EB_666 | RoseRS_4025      | DNA-directed RNA polymerase, beta' subunit/160 kD subunit                                                 | -      | -  | -   |
| MCB1EB_667 | LYNGBM3L_24300   | Predicted NTPase (NACHT family)                                                                           | 66-91  | -  | -   |
| MCB1EB_668 | rpsF             | Predicted NTPase (NACHT family)                                                                           | -      | -  | -   |
| MCB1EB_669 | -                | Ribosomal protein S6                                                                                      | 100    | 86 | 83  |
| MCB1EB_670 | rpsR             | Primosomal replication protein N                                                                          | 100    | 61 | 98  |
| MCB1EB_671 | rplI             | Ribosomal protein S18                                                                                     | 100    | 82 | 100 |
| MCB1EB_672 | dnaB             | Ribosomal protein L9                                                                                      | 100    | 79 | 96  |
| MCB1EB_673 | -                | Replicative DNA helicase                                                                                  | 100    | 85 | 99  |



|            |                   |                                                                                                     |       |    |     |
|------------|-------------------|-----------------------------------------------------------------------------------------------------|-------|----|-----|
| MCB1EB_674 | -                 | Phosphate transport regulator (distant homolog of PhoU)                                             | 100   | 76 | 100 |
| MCB1EB_675 | minE              | Phosphate/sulphate permeases                                                                        | 100   | 84 | 94  |
| MCB1EB_676 | minD              | Septum formation topological specificity factor                                                     | 100   | 77 | 99  |
| MCB1EB_677 | minC              | Septum formation inhibitor-activating ATPase                                                        | 100   | 86 | 100 |
| MCB1EB_678 | Vapar_5848        | Septum formation inhibitor                                                                          | 100   | 56 | 100 |
| MCB1EB_679 | BurJV3_3298       | Hypothetical protein                                                                                | -     | -  | -   |
| MCB1EB_680 | -                 | Predicted transcriptional regulators                                                                | -     | -  | -   |
| MCB1EB_681 | -                 | Biopolymer transport protein                                                                        | 98    | 57 | 99  |
| MCB1EB_682 | RBRH_03933        | Biopolymer transport proteins                                                                       | 100   | 65 | 97  |
| MCB1EB_683 | BURK_023930       | Periplasmic protein TonB, links inner and outer membranes                                           | 100   | -  | -   |
| MCB1EB_684 | -                 | Bacterioferritin-associated ferredoxin                                                              | -     | 48 | -   |
| MCB1EB_685 | -                 | Glutamate racemase                                                                                  | -     | -  | -   |
| MCB1EB_686 | -                 | Bacterioferritin (cytochrome b1)                                                                    | 100   | 81 | 98  |
| MCB1EB_687 | -                 | Predicted membrane protein                                                                          | 100   | 75 | 91  |
| MCB1EB_688 | MC7420_7550       | Integrase                                                                                           | -     | -  | -   |
| MCB1EB_689 | -                 | Predicted NTPase (NACHT family)                                                                     | -     | -  | -   |
| MCB1EB_690 | LYNGBM3L_24300    | Transposase and inactivated derivatives                                                             | -     | -  | -   |
| MCB1EB_691 | OR16_03807        | Predicted NTPase (NACHT family)                                                                     | 66-91 | -  | -   |
| MCB1EB_692 | L810_8411         | Spermidine/putrescine-binding periplasmic protein                                                   | 100   | -  | -   |
| MCB1EB_693 | -                 | Transcriptional regulator                                                                           | 100   | 33 | 87  |
| MCB1EB_694 | fbp1              | Cu/Zn superoxide dismutase                                                                          | 100   | -  | -   |
| MCB1EB_695 | -                 | Fructose-1,6-bisphosphatase                                                                         | 100   | 80 | 99  |
| MCB1EB_696 | -                 | ABC-type spermidine/putrescine transport system, permease component I                               | 100   | -  | -   |
| MCB1EB_697 | PMI24_02397       | ABC-type spermidine/putrescine transport systems, ATPase components                                 | 100   | -  | -   |
| MCB1EB_698 | PMO01_28020       | Hypothetical protein                                                                                | 100   | -  | -   |
| MCB1EB_699 | CARN4_0352        | Hypothetical protein                                                                                | 100   | -  | -   |
| MCB1EB_700 | WALBB_1140015     | Hypothetical protein                                                                                | 100   | -  | -   |
| MCB1EB_701 | -                 | FOG: Ankyrin repeat                                                                                 | 100   | -  | -   |
| MCB1EB_702 | -                 | Putative translation initiation inhibitor, yjgF family                                              | 100   | 72 | 99  |
| MCB1EB_703 | htpG              | Permeases of the drug/metabolite transporter (DMT) superfamily                                      | 100   | -  | -   |
| MCB1EB_704 | ubiC              | Molecular chaperone, HSP90 family                                                                   | 100   | 79 | 99  |
| MCB1EB_705 | -                 | 4-hydroxybenzoate synthetase (chorismate lyase)                                                     | 100   | 49 | 92  |
| MCB1EB_706 | -                 | G:T/U mismatch-specific DNA glycosylase                                                             | 100   | 71 | 97  |
| MCB1EB_707 | -                 | Spermidine synthase                                                                                 | 100   | 66 | 95  |
| MCB1EB_708 | Cenrod_0254       | Transposase and inactivated derivatives                                                             | -     | -  | -   |
| MCB1EB_709 | -                 | Predicted NTPase (NACHT family)                                                                     | 66-91 | -  | -   |
| MCB1EB_710 | CAGGBEG34_330054  | Transposase and inactivated derivatives                                                             | -     | -  | -   |
| MCB1EB_711 | SES60163_16622    | Hypothetical protein                                                                                | -     | -  | -   |
| MCB1EB_712 | PSPTOT1_4093      | Transcriptional regulator, contains sigma factor-related N-terminal domain                          | 100   | -  | -   |
| MCB1EB_713 | SES60163_16627    | NAD-dependent aldehyde dehydrogenases                                                               | -     | -  | -   |
| MCB1EB_714 | SM39_2078         | Large exoproteins involved in heme utilization or adhesion                                          | -     | -  | -   |
| MCB1EB_715 | RSPO_m00925       | Hypothetical protein                                                                                | 100   | -  | -   |
| MCB1EB_716 | MPL1_08392        | Large exoproteins involved in heme utilization or adhesion                                          | -     | -  | -   |
| MCB1EB_717 | mutY              | Large exoproteins involved in heme utilization or adhesion                                          | -     | -  | -   |
| MCB1EB_718 | mutM              | A/G-specific DNA glycosylase                                                                        | 100   | 59 | 90  |
| MCB1EB_719 | -                 | Formamidopyrimidine-DNA glycosylase                                                                 | 100   | 70 | 100 |
| MCB1EB_720 | loIB              | FOG: TPR repeat                                                                                     | 100   | 57 | 88  |
| MCB1EB_721 | ipk               | Outer membrane lipoprotein involved in outer membrane biogenesis                                    | 100   | -  | -   |
| MCB1EB_722 | prsA              | 4-diphosphocytidyl-2C-methyl-D-erythritol 2-phosphate synthase                                      | 100   | 67 | 82  |
| MCB1EB_723 | tplY              | Phosphoribosylpyrophosphate synthetase                                                              | 100   | 89 | 99  |
| MCB1EB_724 | pthI              | Ribosomal protein L25 (general stress protein Ctc)                                                  | 100   | 73 | 98  |
| MCB1EB_725 | -                 | Peptidyl-rRNA hydrolase                                                                             | 100   | 69 | 98  |
| MCB1EB_726 | RBRH_01242        | Hypothetical protein                                                                                | 100   | -  | -   |
| MCB1EB_727 | -                 | Outer membrane protein (porin)                                                                      | 100   | -  | 100 |
| MCB1EB_728 | ndk               | Integral membrane protein, interacts with FtsH                                                      | 100   | -  | 99  |
| MCB1EB_729 | -                 | Nucleoside diphosphate kinase                                                                       | 100   | -  | 100 |
| MCB1EB_730 | CAGGBEG34_80006   | Predicted Fe-S-cluster redox enzyme                                                                 | 100   | -  | 96  |
| MCB1EB_731 | BH160DRAFT_6135   | Tfp pilus assembly protein PilF                                                                     | 100   | -  | -   |
| MCB1EB_732 | ispG              | Uncharacterized protein conserved in bacteria                                                       | 100   | 37 | 89  |
| MCB1EB_733 | hisS              | Enzyme involved in the deoxyxylulose pathway of isoprenoid biosynthesis                             | 100   | 74 | 96  |
| MCB1EB_734 | BH160DRAFT_6132   | Histidyl-tRNA synthetase                                                                            | 100   | 76 | 100 |
| MCB1EB_735 | -                 | Uncharacterized protein conserved in bacteria                                                       | 100   | 56 | 100 |
| MCB1EB_736 | engA              | FOG: WD40-like repeat                                                                               | 90    | 61 | 100 |
| MCB1EB_737 | hfq               | Predicted GTPases                                                                                   | 100   | 80 | 100 |
| MCB1EB_738 | BC1003_1211       | Uncharacterized host factor I protein                                                               | 100   | 91 | 100 |
| MCB1EB_739 | CARN2_3473        | Membrane protease subunits, stomatin/prohibitin homologs                                            | 100   | 45 | 91  |
| MCB1EB_740 | -                 | Membrane protease subunits, stomatin/prohibitin homologs                                            | 100   | 43 | 87  |
| MCB1EB_741 | purA              | ATP phosphoribosyltransferase involved in histidine biosynthesis                                    | 100   | 72 | 100 |
| MCB1EB_742 | kup2              | Adenylosuccinate synthase                                                                           | 100   | 77 | 100 |
| MCB1EB_743 | -                 | K+ transporter                                                                                      | 100   | 76 | 98  |
| MCB1EB_744 | -                 | Transcriptional accessory protein                                                                   | 100   | 79 | 95  |
| MCB1EB_745 | BCh11DRAFT_06143  | Hypothetical protein                                                                                | 100   | -  | -   |
| MCB1EB_746 | dinG              | Hypothetical protein                                                                                | 100   | -  | -   |
| MCB1EB_747 | C438_14856        | Rad3-related DNA helicases                                                                          | 98    | 62 | 93  |
| MCB1EB_748 | BgramDRAFT_0582   | DNA-binding HTH domain-containing proteins                                                          | 100   | -  | -   |
| MCB1EB_749 | CAPGI0001_1457    | AraC-type DNA-binding domain-containing proteins                                                    | 100   | 43 | 100 |
| MCB1EB_750 | CC1_07920         | Microtubule-binding protein involved in cell cycle control                                          | 100   | -  | -   |
| MCB1EB_751 | BgramDRAFT_0573   | Hypothetical protein                                                                                | 100   | -  | -   |
| MCB1EB_752 | BMAJHU_10812      | Response regulators consisting of a CheY-like receiver domain and a winged-helix DNA-binding domain | 100   | 46 | 96  |
| MCB1EB_753 | BMAA1618          | Acetyltransferases, including N-acetylases of ribosomal proteins                                    | 100   | -  | -   |
| MCB1EB_754 | HMPREF1195_01277  | Acetyltransferases, including N-acetylases of ribosomal proteins                                    | 100   | -  | -   |
| MCB1EB_755 | EUTSA_v10020525mg | Acetyl-CoA acetyltransferase                                                                        | 80    | -  | -   |
| MCB1EB_756 | hpaB              | Mannose-1-phosphate guanylyltransferase                                                             | 94    | -  | -   |
| MCB1EB_757 | -                 | Hypothetical protein                                                                                | 100   | 71 | 100 |
| MCB1EB_758 | bgla_2g02110      | Trypsin-like serine proteases, typically periplasmic, contain C-terminal PDZ domain                 | 100   | -  | -   |
| MCB1EB_759 | bgla_2g02120      | FOG: CBS domain                                                                                     | 100   | 30 | 89  |
| MCB1EB_760 | METH_21655        | Hypothetical protein                                                                                | 94    | 29 | 86  |
| MCB1EB_761 | BgramDRAFT_0557   | Fe2+ transport system protein B                                                                     | 100   | -  | -   |
| MCB1EB_762 | yscR              | Type III secretory pathway, component EscS                                                          | 100   | 56 | 100 |
| MCB1EB_763 | PMI06_000610      | Type III secretory pathway, component EscR                                                          | 100   | 67 | 100 |
| MCB1EB_764 | BgramDRAFT_0561   | Flagellar motor switch/type III secretory pathway protein                                           | 100   | 31 | 93  |
| MCB1EB_765 | -                 | Hypothetical protein                                                                                | 100   | -  | -   |
| MCB1EB_766 | setU              | Type III secretory pathway, component EscV                                                          | 100   | 66 | 45  |
| MCB1EB_767 | queF              | Flagellar biosynthesis pathway, component FlhB                                                      | 100   | 48 | 100 |
| MCB1EB_768 | ilvA              | Enzyme related to GTP cyclohydrolase I                                                              | 100   | 67 | 100 |
| MCB1EB_769 | CGI_10022907      | Threonine dehydratase                                                                               | 100   | 75 | 100 |
| MCB1EB_770 | -                 | Membrane carboxypeptidase/penicillin-binding protein                                                | -     | -  | -   |
| MCB1EB_771 | -                 | FAD/FMN-containing dehydrogenases                                                                   | 100   | 77 | 100 |
| MCB1EB_772 | ubiE              | Diadenosine tetraphosphate (Ap4A) hydrolase and other HIT family hydrolases                         | 100   | 55 | 76  |
| MCB1EB_773 | BC1002_0370       | Methylase involved in ubiquinone/menaquinone biosynthesis                                           | 100   | 76 | 100 |

|            |                   |                                                                                                                   |       |       |     |
|------------|-------------------|-------------------------------------------------------------------------------------------------------------------|-------|-------|-----|
| MCB1EB_774 | BamMEX5DRAFT_4566 | Uncharacterized protein conserved in bacteria                                                                     | 100   | 47    | 90  |
| MCB1EB_775 | TBLA0B04730       | Type II secretory pathway, component PulD                                                                         | 100   | 46    | 100 |
| MCB1EB_776 | TMO_c0168         | FOG: WD40 repeat                                                                                                  | 100   | -     | -   |
| MCB1EB_777 | Jab_2e00820       | Hypothetical protein                                                                                              | 100   | -     | -   |
| MCB1EB_778 | ARALYDRAFT_663337 | Uncharacterized conserved protein                                                                                 | 100   | -     | -   |
| MCB1EB_779 | M595_1342         | Hypothetical protein                                                                                              | 85    | -     | -   |
| MCB1EB_780 | Halhy_2265        | Leucine-rich repeat (LRR) protein                                                                                 | 100   | -     | -   |
| MCB1EB_781 | Halhy_2265        | Predicted NTPase (NACHT family)                                                                                   | 66-91 | -     | -   |
| MCB1EB_782 | PMI16_02582       | Predicted NTPase (NACHT family)                                                                                   | 66-92 | -     | -   |
| MCB1EB_783 | ligA              | Response regulator containing a CheY-like receiver domain and an HTH DNA-binding domain                           | 100   | -     | -   |
| MCB1EB_784 | glnD              | NAD-dependent DNA ligase (contains BRCT domain type II)                                                           | 100   | 70    | 99  |
| MCB1EB_785 | map               | UTP:GlnB (protein Pil) uridylyltransferase                                                                        | 100   | 67    | 98  |
| MCB1EB_786 | -                 | Methionine aminopeptidase                                                                                         | 86    | 81    | 86  |
| MCB1EB_787 | DSC_04030         | Integrase                                                                                                         | -     | -     | -   |
| MCB1EB_788 | -                 | Response regulators consisting of a CheY-like receiver domain and a winged-helix DNA-binding domain               | -     | -     | -   |
| MCB1EB_789 | -                 | Dehydrogenases with different specificities (related to short-chain alcohol dehydrogenases)                       | -     | -     | -   |
| MCB1EB_790 | O166_08720        | Transposase and inactivated derivatives                                                                           | -     | -     | -   |
| MCB1EB_791 | RRP5-2            | Transposase and inactivated derivatives                                                                           | -     | -     | -   |
| MCB1EB_792 | UU7_15460         | Hypothetical protein                                                                                              | -     | -     | -   |
| MCB1EB_793 | AOL_s00004g332    | Zn-dependent hydrolases, including glyoxylases                                                                    | -     | -     | -   |
| MCB1EB_794 | -                 | Small-conductance mechanosensitive channel                                                                        | -     | -     | -   |
| MCB1EB_795 | -                 | InterPro IPR001584 COGs COG2801                                                                                   | 100   | -     | -   |
| MCB1EB_796 | GMDG_00079        | InterPro IPR001584 COGs COG2801                                                                                   | -     | -     | -   |
| MCB1EB_797 | KM1_230160        | Glutathione synthase/Ribosomal protein S6 modification enzyme (glutaminyl transferase)                            | 75    | -     | -   |
| MCB1EB_798 | CCALI_00757       | Pyruvate/2-oxoglutarate dehydrogenase complex, dihydrolipoamide dehydrogenase (E3) component, and related enzymes | 98    | -     | -   |
| MCB1EB_799 | -                 | Dephospho-CoA kinase                                                                                              | -     | -     | -   |
| MCB1EB_800 | -                 | Integral membrane protein possibly involved in chromosome condensation                                            | 100   | 58    | 98  |
| MCB1EB_801 | -                 | Asp-tRNAAsn/Glu-tRNA Gln amidotransferase A subunit and related amidases                                          | 100   | 49    | 95  |
| MCB1EB_802 | metE              | Transcriptional regulator                                                                                         | 100   | 34    | 95  |
| MCB1EB_803 | Reut_C6143        | Methionine synthase II (cobalamin-independent)                                                                    | 100   | 54    | 99  |
| MCB1EB_804 | hipA              | Predicted transcriptional regulators                                                                              | 92    | -     | -   |
| MCB1EB_805 | -                 | Uncharacterized protein related to capsule biosynthesis enzymes                                                   | -     | -     | -   |
| MCB1EB_806 | Paz_35            | Aminopeptidase N                                                                                                  | 100   | 65    | 99  |
| MCB1EB_807 | PCC21_027950      | Leucyl-tRNA synthetase                                                                                            | -     | -     | -   |
| MCB1EB_808 | Sant_P0287        | Hypothetical protein                                                                                              | -     | -     | -   |
| MCB1EB_809 | -                 | Uncharacterized conserved protein                                                                                 | -     | -     | -   |
| MCB1EB_810 | chaB              | Predicted membrane protein                                                                                        | -     | 57    | -   |
| MCB1EB_811 | BCh11DRAFT_07142  | Putative cation transport regulator                                                                               | -     | -     | -   |
| MCB1EB_812 | WQE_32336         | Exonuclease V gamma subunit                                                                                       | 100   | 50    | 100 |
| MCB1EB_813 | recD              | ATP-dependent exoDNase (exonuclease V) beta subunit (contains helicase and exonuclease domains)                   | 99    | 51    | 97  |
| MCB1EB_814 | X636_03970        | ATP-dependent exoDNase (exonuclease V), alpha subunit - helicase superfamily 1 member                             | 100   | 52    | 93  |
| MCB1EB_815 | THITH_00215       | Chemotaxis protein histidine kinase and related kinases                                                           | 100   | -     | -   |
| MCB1EB_816 | -                 | Hypothetical protein                                                                                              | 100   | -     | -   |
| MCB1EB_817 | -                 | Membrane-bound lytic murein transglycosylase B                                                                    | 100   | 57    | 94  |
| MCB1EB_818 | LYNGBM3L_24300    | Uncharacterized conserved protein                                                                                 | -     | -     | -   |
| MCB1EB_819 | -                 | Predicted NTPase (NACHT family)                                                                                   | 78-96 | -     | -   |
| MCB1EB_820 | metN              | Predicted membrane protein                                                                                        | 100   | -     | 97  |
| MCB1EB_821 | -                 | ABC-type metal ion transport system, ATPase component                                                             | 100   | 73    | 100 |
| MCB1EB_822 | -                 | ABC-type metal ion transport system, permease component                                                           | 100   | 77    | 100 |
| MCB1EB_823 | -                 | ABC-type metal ion transport system, periplasmic component/surface antigen                                        | 100   | 58-67 | 100 |
| MCB1EB_824 | -                 | Electron transfer flavoprotein, beta subunit                                                                      | 100   | 80    | 100 |
| MCB1EB_825 | -                 | Electron transfer flavoprotein, alpha subunit                                                                     | 100   | 72    | 99  |
| MCB1EB_826 | PT7_0544          | Acyl-CoA dehydrogenases                                                                                           | 100   | 64    | 97  |
| MCB1EB_827 | CAGBEG34_220029   | Predicted transcriptional regulators                                                                              | 100   | -     | -   |
| MCB1EB_828 | SSI_G_05485       | Uncharacterized protein related to capsule biosynthesis enzymes                                                   | 100   | -     | -   |
| MCB1EB_829 | -                 | Predicted NTPase (NACHT family)                                                                                   | -     | -     | -   |
| MCB1EB_830 | rpsP              | DNA repair photolyase                                                                                             | 99    | 66    | 97  |
| MCB1EB_831 | rimM              | Ribosomal protein S16                                                                                             | 100   | 75    | 93  |
| MCB1EB_832 | trmD              | RimM protein, required for 16S rRNA processing                                                                    | 100   | 49    | 95  |
| MCB1EB_833 | rplS              | tRNA-(guanine-N1)-methyltransferase                                                                               | 100   | 72    | 97  |
| MCB1EB_834 | cobD              | Ribosomal protein L19                                                                                             | 100   | -     | -   |
| MCB1EB_835 | A986_18323        | Cobalamin biosynthesis protein CobD/CbiB                                                                          | 100   | 70    | 100 |
| MCB1EB_836 | engC              | FOG: TPR repeat                                                                                                   | 98    | -     | -   |
| MCB1EB_837 | -                 | Predicted GTPases                                                                                                 | 100   | 65    | 100 |
| MCB1EB_838 | om                | Zn-dependent protease with chaperone function                                                                     | 100   | 70    | 100 |
| MCB1EB_839 | pmbA              | Oligoribonuclease (3'->5' exoribonuclease)                                                                        | 100   | 77    | 91  |
| MCB1EB_840 | rpoC              | Predicted Zn-dependent proteases and their inactivated homologs                                                   | 100   | 73    | 100 |
| MCB1EB_841 | BcDW1_3665        | Precorrin-3B methylase                                                                                            | -     | -     | -   |
| MCB1EB_842 | Halhy_2265        | Predicted NTPase (NACHT family)                                                                                   | 78-96 | -     | -   |
| MCB1EB_843 | -                 | Predicted NTPase (NACHT family)                                                                                   | 78-96 | -     | -   |
| MCB1EB_844 | folA              | Transposase and inactivated derivatives                                                                           | -     | -     | -   |
| MCB1EB_845 | thyA              | Dihydrofolate reductase                                                                                           | 100   | 70    | 99  |
| MCB1EB_846 | dusA              | Thymidylate synthase                                                                                              | 100   | 56    | 99  |
| MCB1EB_847 | lexA              | tRNA-dihydrouridine synthase                                                                                      | 83    | -     | -   |
| MCB1EB_848 | -                 | SOS-response transcriptional repressors (RecA-mediated autopeptidases)                                            | 100   | 70    | 100 |
| MCB1EB_849 | rpsB              | L-asparaginase/archaeal Glu-tRNA Gln amidotransferase subunit D                                                   | 100   | 64    | 95  |
| MCB1EB_850 | tsf               | Ribosomal protein S2                                                                                              | 100   | 81    | 100 |
| MCB1EB_851 | pyrH              | Translation elongation factor Ts                                                                                  | 100   | 76    | 95  |
| MCB1EB_852 | ifr               | Uridylate kinase                                                                                                  | 100   | 92    | 97  |
| MCB1EB_853 | uppS              | Ribosome recycling factor                                                                                         | 100   | 78    | 100 |
| MCB1EB_854 | RBRH_03570        | Undecaprenyl pyrophosphate synthase                                                                               | 100   | 69    | 96  |
| MCB1EB_855 | dxr               | CDP-diglyceride synthetase                                                                                        | 100   | 49    | 96  |
| MCB1EB_856 | -                 | 1-deoxy-D-xylulose 5-phosphate reductoisomerase                                                                   | 100   | 68    | 95  |
| MCB1EB_857 | -                 | Outer membrane protein/protective antigen OMA87                                                                   | 100   | 72    | 100 |
| MCB1EB_858 | lpxD              | Outer membrane protein                                                                                            | 100   | 64    | 94  |
| MCB1EB_859 | fabZ              | UDP-3-O-[3-hydroxymyristoyl] glucosamine N-acyltransferase                                                        | 100   | 68    | 94  |
| MCB1EB_860 | lpxA              | 3-hydroxymyristoyl/3-hydroxydecanoyl-(acyl carrier protein) dehydratases                                          | 100   | 80    | 96  |
| MCB1EB_861 | lpxB              | Acyl-[acyl carrier protein]-UDP-N-acetylglucosamine O-acyltransferase                                             | 100   | 74    | 100 |
| MCB1EB_862 | mhb               | Lipid A disaccharide synthetase                                                                                   | 100   | 65    | 96  |
| MCB1EB_863 | BTH_I2042         | Ribonuclease HII                                                                                                  | 100   | 69    | 95  |
| MCB1EB_864 | BrE312_2629       | rRNA methylases                                                                                                   | 100   | 56    | 100 |
| MCB1EB_865 | -                 | Uncharacterized conserved protein                                                                                 | 100   | -     | 98  |
| MCB1EB_866 | ppsA              | Uncharacterized protein conserved in bacteria                                                                     | 100   | 82    | 100 |
| MCB1EB_867 | BDA_G_01288       | Phosphoenolpyruvate synthase/pyruvate phosphate dikinase                                                          | 100   | 84    | 100 |
| MCB1EB_868 | -                 | Hypothetical protein                                                                                              | 100   | 48    | 99  |
| MCB1EB_869 | BN131_3651        | Membrane protease subunits, stomatin/prohibitin homologs                                                          | 100   | -     | -   |



|            |                  |                                                                                                     |        |       |     |
|------------|------------------|-----------------------------------------------------------------------------------------------------|--------|-------|-----|
| MCB1EB_870 | DOTSEDRAFT_70016 | Nucleoid-associated protein                                                                         | 100    | -     | -   |
| MCB1EB_871 | smpB             | Histone acetyltransferase HPA2 and related acetyltransferases                                       | 100    | -     | -   |
| MCB1EB_872 | -                | tmRNA-binding protein                                                                               | 100    | 79    | 98  |
| MCB1EB_873 | WQE_31521        | Oligoketide cyclase/lipid transport protein                                                         | 100    | -     | -   |
| MCB1EB_874 | guaB             | Uncharacterized protein conserved in bacteria                                                       | 100    | 60    | 95  |
| MCB1EB_875 | guaA             | IMP dehydrogenase/GMP reductase                                                                     | 100    | 86    | 100 |
| MCB1EB_876 | -                | GMP synthase, PP-ATPase domain/subunit                                                              | 100    | 80    | 100 |
| MCB1EB_877 | Hally_2265       | Transposase and inactivated derivatives                                                             | -      | -     | -   |
| MCB1EB_878 | tnpA             | Predicted NTPase (NACHT family)                                                                     | -      | -     | -   |
| MCB1EB_879 | -                | Transposase and inactivated derivatives                                                             | -      | 53    | -   |
| MCB1EB_880 | KGM_22366        | Transposase and inactivated derivatives                                                             | -      | 64    | -   |
| MCB1EB_881 | N234_15805       | FOG: HEAT repeat                                                                                    | -      | -     | -   |
| MCB1EB_882 | plu1110          | Transposase and inactivated derivatives                                                             | -      | -     | -   |
| MCB1EB_883 | -                | FOG: WD40 repeat                                                                                    | -      | -     | -   |
| MCB1EB_884 | -                | Retron-type reverse transcriptase                                                                   | 100    | -     | -   |
| MCB1EB_885 | HNWD1            | Transposase and inactivated derivatives                                                             | -      | -     | -   |
| MCB1EB_886 | -                | Predicted NTPase (NACHT family)                                                                     | 66-91  | -     | -   |
| MCB1EB_887 | rep              | Predicted NTPase (NACHT family)                                                                     | 66-91  | -     | -   |
| MCB1EB_888 | A33K_12849       | Superfamily I DNA and RNA helicases                                                                 | 100    | 77    | 99  |
| MCB1EB_889 | RCFBP_10023      | Cytochrome c5                                                                                       | 100    | 51    | 100 |
| MCB1EB_890 | -                | Uncharacterized protein conserved in bacteria                                                       | 90     | -     | -   |
| MCB1EB_891 | -                | K <sup>+</sup> -transporting ATPase, A chain                                                        | 100    | 66    | 100 |
| MCB1EB_892 | -                | High-affinity K <sup>+</sup> transport system, ATPase chain B                                       | 100    | 79    | 99  |
| MCB1EB_893 | PMI14_06932      | K <sup>+</sup> -transporting ATPase, c chain                                                        | 100    | 62    | 99  |
| MCB1EB_894 | -                | Hypothetical protein                                                                                | 100    | -     | -   |
| MCB1EB_895 | -                | Osmosensitive K <sup>+</sup> channel histidine kinase                                               | 100    | 63    | 98  |
| MCB1EB_896 | Veis_0806        | Response regulators consisting of a CheY-like receiver domain and a winged-helix DNA-binding domain | 100    | 75    | 100 |
| MCB1EB_897 | -                | Uncharacterized conserved protein                                                                   | -      | -     | -   |
| MCB1EB_898 | NAS141_02841     | Superfamily II DNA/RNA helicases, SNF2 family                                                       | -      | -     | -   |
| MCB1EB_899 | mfd              | Hypothetical protein                                                                                | -      | -     | -   |
| MCB1EB_900 | ispD             | Transcription-repair coupling factor (superfamily II helicase)                                      | 100    | 77    | 99  |
| MCB1EB_901 | ispF             | 4-diphosphocytidyl-2-methyl-D-erythritol synthase                                                   | 100    | 69    | 94  |
| MCB1EB_902 | clpB             | 2C-methyl-D-erythritol 2,4-cyclodiphosphate synthase                                                | 100    | 72    | 99  |
| MCB1EB_903 | M472_06040       | ATPases with chaperone activity, ATP-binding subunit                                                | 100    | -     | -   |
| MCB1EB_904 | -                | Negative regulator of beta-lactamase expression                                                     | 100    | -     | -   |
| MCB1EB_905 | -                | Superfamily II RNA helicase                                                                         | 100    | -     | -   |
| MCB1EB_906 | rhIE2            | Predicted membrane GTPase involved in stress response                                               | 100    | 84    | 98  |
| MCB1EB_907 | -                | Superfamily II DNA and RNA helicases                                                                | 100    | 71    | 96  |
| MCB1EB_908 | Hsro_1294        | Predicted sulfurtransferase                                                                         | -      | 72    | 97  |
| MCB1EB_909 | v1g109364        | Large exoproteins involved in heme utilization or adhesion                                          | -      | -     | -   |
| MCB1EB_910 | THAPSDRAFT_3777  | Dihydrodipicolinate synthase/N-acetylneuraminate lyase                                              | 99     | -     | -   |
| MCB1EB_911 | RPSI07_mpl112    | 3-methyladenine DNA glycosylase                                                                     | 100    | -     | -   |
| MCB1EB_912 | C266_17566       | Large exoproteins involved in heme utilization or adhesion                                          | 90-97  | 38    | -   |
| MCB1EB_913 | PTE_00017        | A1 Pase related to the nuclease subunit of the Holliday junction resolvase                          | -      | -     | -   |
| MCB1EB_914 | HNWD1            | Large exoproteins involved in heme utilization or adhesion                                          | -      | -     | -   |
| MCB1EB_915 | BDB_mp40104      | Predicted NTPase (NACHT family)                                                                     | 81-100 | -     | -   |
| MCB1EB_916 | -                | Predicted glutamine amidotransferase involved in pyridoxine biosynthesis                            | -      | -     | -   |
| MCB1EB_917 | -                | Glucose-6-phosphate isomerase                                                                       | -      | -     | -   |
| MCB1EB_918 | -                | Transposase and inactivated derivatives                                                             | 100    | 65    | -   |
| MCB1EB_919 | dnaE             | Transposase and inactivated derivatives                                                             | 100    | 58    | -   |
| MCB1EB_920 | RBRH_00570       | DNA polymerase III, alpha subunit                                                                   | 100    | 74    | 100 |
| MCB1EB_921 | -                | Na <sup>+</sup> /citrate symporter                                                                  | 88-100 | 57-58 | -   |
| MCB1EB_922 | -                | InterPro IPR001584 COGs COG2801                                                                     | -      | -     | -   |
| MCB1EB_923 | AN3547.2         | Glycerophosphoryl diester phosphodiesterase                                                         | -      | -     | -   |
| MCB1EB_924 | HCAQ_07455       | FOG: TPR repeat                                                                                     | -      | -     | -   |
| MCB1EB_925 | Rpic12D_2004     | FOG: HEAT repeat                                                                                    | -      | -     | -   |
| MCB1EB_926 | -                | Glycosyltransferases involved in cell wall biogenesis                                               | 100    | -     | -   |
| MCB1EB_927 | CAGGBEG34_210069 | Glycosyltransferases involved in cell wall biogenesis                                               | 100    | -     | -   |
| MCB1EB_928 | msbA             | Lipid A core - O-antigen ligase and related enzymes                                                 | 100    | -     | -   |
| MCB1EB_929 | cafA             | ABC-type multidrug transport system, A1 Pase and permease                                           | 100    | 73    | 98  |
| MCB1EB_930 | -                | Ribonucleases G and E                                                                               | 100    | 77    | 100 |
| MCB1EB_931 | nadD             | Uncharacterized homolog of plant lojap protein                                                      | 100    | 73    | 100 |
| MCB1EB_932 | hemF             | Nicotinic acid mononucleotide adenyltransferase                                                     | 100    | 54    | 98  |
| MCB1EB_933 | purD             | Coproporphyrinogen III oxidase                                                                      | 100    | 67    | 98  |
| MCB1EB_934 | -                | Phosphoribosylamine-glycine ligase                                                                  | 100    | 79    | 99  |
| MCB1EB_935 | -                | Uncharacterized conserved protein                                                                   | 100    | 82    | 99  |
| MCB1EB_936 | scpB             | 16S rRNA uridine-516 pseudouridylylase and related pseudouridylylase synthases                      | 100    | 59    | 87  |
| MCB1EB_937 | BURK_000910      | Predicted transcriptional regulator containing the HTH domain                                       | 100    | -     | -   |
| MCB1EB_938 | Calla_1546       | Membrane proteins related to metalloendopeptidases                                                  | 100    | 54    | 92  |
| MCB1EB_939 | CAGGBEG34_330054 | ATP-dependent protease HslVU (ClpYQ), ATPase subunit                                                | 100    | -     | -   |
| MCB1EB_940 | R0011_03965      | Hypothetical protein                                                                                | -      | -     | -   |
| MCB1EB_941 | F886_02160       | Hypothetical protein                                                                                | -      | -     | -   |
| MCB1EB_942 | -                | Hypothetical protein                                                                                | -      | -     | -   |
| MCB1EB_943 | -                | Uncharacterized conserved small protein                                                             | -      | 76    | -   |
| MCB1EB_944 | BgramDRAFT_6427  | Inactive homolog of metal-dependent proteases, putative molecular chaperone                         | 75     | -     | -   |
| MCB1EB_945 | -                | Acetyltransferases                                                                                  | 100    | -     | -   |
| MCB1EB_946 | SG0735           | Uracil-DNA glycosylase                                                                              | 100    | -     | -   |
| MCB1EB_947 | thiD             | Uncharacterized conserved protein                                                                   | 100    | 35-36 | -   |
| MCB1EB_948 | lpiT             | Hydroxymethylpyrimidine/phosphomethylpyrimidine kinase                                              | 100    | 71    | 100 |
| MCB1EB_949 | -                | Permeases of the major facilitator superfamily                                                      | 100    | 71    | 100 |
| MCB1EB_950 | sms              | Alanine racemase                                                                                    | 100    | 68    | 99  |
| MCB1EB_951 | HCAQ_07455       | Predicted ATP-dependent serine protease                                                             | 100    | 84    | 98  |
| MCB1EB_952 | dnaX             | FOG: HEAT repeat                                                                                    | 94     | -     | 95  |
| MCB1EB_953 | dnaX             | DNA polymerase III, gamma/tau subunits                                                              | 100    | -     | -   |
| MCB1EB_954 | -                | DNA polymerase III, gamma/tau subunits                                                              | 100    | -     | -   |
| MCB1EB_955 | recR             | Uncharacterized protein conserved in bacteria                                                       | 100    | 77    | 100 |
| MCB1EB_956 | iscX             | Recombinational DNA repair protein (RecF pathway)                                                   | 84     | 78    | 98  |
| MCB1EB_957 | -                | Uncharacterized protein conserved in bacteria                                                       | 100    | 82    | 100 |
| MCB1EB_958 | -                | Universal stress protein UspA and related nucleotide-binding proteins                               | 100    | -     | -   |
| MCB1EB_959 | cobN             | Superfamily II DNA and RNA helicases                                                                | 100    | -     | -   |
| MCB1EB_960 | -                | Hypothetical protein                                                                                | 86     | -     | -   |
| MCB1EB_961 | Bcep18194_A3475  | Superfamily I DNA and RNA helicases                                                                 | 100    | 69    | 100 |
| MCB1EB_962 | RBRH_00037       | Uncharacterized protein involved in tolerance to divalent cations                                   | 90     | 57    | 80  |
| MCB1EB_963 | HMPREF1482_00429 | Hypothetical protein                                                                                | -      | -     | -   |
| MCB1EB_964 | RBRH_03890       | Hypothetical protein                                                                                | -      | -     | -   |
| MCB1EB_965 | HMPREF0497_0173  | Hypothetical protein                                                                                | 100    | -     | -   |
| MCB1EB_966 | thrB             | Hypothetical protein                                                                                | -      | -     | -   |
| MCB1EB_967 | -                | Putative homoserine kinase type II (protein kinase fold)                                            | 100    | 64    | 100 |
| MCB1EB_968 | -                | Nucleoside phosphorylase                                                                            | 100    | 75    | 100 |
| MCB1EB_969 | polA             | Predicted Rossmann fold nucleotide-binding protein                                                  | 97     | 77    | 98  |
| MCB1EB_970 | rpoB             | DNA polymerase I - 3'-5' exonuclease and polymerase domains                                         | 100    | 70    | 100 |
| MCB1EB_971 | -                | DNA-directed RNA polymerase, beta subunit/140 kD subunit                                            | -      | -     | -   |
| MCB1EB_972 | LEPIGSC108_1530  | NADH dehydrogenase, FAD-containing subunit                                                          | 100    | 61    | 97  |

|             |                 |                                                                                                  |        |       |     |
|-------------|-----------------|--------------------------------------------------------------------------------------------------|--------|-------|-----|
| MCB1EB_973  | Dtox_3121       | Leucine-rich repeat (LRR) protein                                                                | 100    | -     | -   |
| MCB1EB_974  | rpoC2           | Hypothetical protein                                                                             | 99     | -     | -   |
| MCB1EB_975  | RSp1073         | Thymidylate kinase                                                                               | 97     | -     | -   |
| MCB1EB_976  | Entel_4309      | Large exoproteins involved in heme utilization or adhesion                                       | -      | 39    | -   |
| MCB1EB_977  | sseA            | NAD-dependent aldehyde dehydrogenases                                                            | 100    | -     | -   |
| MCB1EB_978  | -               | Rhodanese-related sulfurtransferase                                                              | -      | -     | -   |
| MCB1EB_979  | -               | Rhodanese-related sulfurtransferase                                                              | -      | -     | -   |
| MCB1EB_980  | RBRH_00570      | Phenylpropionate dioxygenase and related ring-hydroxylating dioxygenases, large terminal subunit | 100    | 72    | 98  |
| MCB1EB_981  | A33K_13045      | Na <sup>+</sup> /citrate symporter                                                               | 94-100 | 55    | -   |
| MCB1EB_982  | PA6_003_01060   | Spermidine/putrescine-binding periplasmic protein                                                | 100    | -     | -   |
| MCB1EB_983  | -               | ABC-type spermidine/putrescine transport system, permease component II                           | 99     | -     | -   |
| MCB1EB_984  | -               | ABC-type spermidine/putrescine transport system, permease component I                            | 90     | 27    | -   |
| MCB1EB_985  | -               | ABC-type spermidine/putrescine transport systems, ATPase components                              | 100    | -     | -   |
| MCB1EB_986  | BTH_I10086      | Transposase and inactivated derivatives, ISS family                                              | -      | 82    | -   |
| MCB1EB_987  | PA6_003_01060   | Spermidine/putrescine-binding periplasmic protein                                                | 96     | -     | -   |
| MCB1EB_988  | PACG_03516      | ABC-type spermidine/putrescine transport system, permease component II                           | -      | -     | -   |
| MCB1EB_989  | BP1026A_1768    | ABC-type spermidine/putrescine transport system, permease component I                            | -      | 30    | -   |
| MCB1EB_990  | BTI_4604        | AraC-type DNA-binding domain-containing proteins                                                 | -      | -     | -   |
| MCB1EB_991  | O166_14525      | Histone acetyltransferase HPA2 and related acetyltransferases                                    | -      | -     | -   |
| MCB1EB_992  | thiE            | Transaldolase                                                                                    | 100    | -     | -   |
| MCB1EB_993  | thiG            | Thiamine monophosphate synthase                                                                  | 87     | 56    | 95  |
| MCB1EB_994  | Bphyt_3574      | Uncharacterized enzyme of thiazole biosynthesis                                                  | 100    | 75    | 99  |
| MCB1EB_995  | -               | Sulfur transfer protein involved in thiamine biosynthesis                                        | 100    | 51    | 100 |
| MCB1EB_996  | xseB            | Glycine/D-amino acid oxidases (deaminating)                                                      | 94     | 62    | 96  |
| MCB1EB_997  | ispA            | Exonuclease VII small subunit                                                                    | 100    | -     | -   |
| MCB1EB_998  | dxs             | Geranylgeranyl pyrophosphate synthase                                                            | 100    | 66    | 99  |
| MCB1EB_999  | -               | Deoxyxylulose-5-phosphate synthase                                                               | 100    | 75-79 | 96  |
| MCB1EB_1000 | gcp             | Uncharacterized conserved protein                                                                | 100    | 72    | 98  |
| MCB1EB_1001 | LEPIGSC043_2144 | Metal-dependent proteases with possible chaperone activity                                       | 100    | 79    | 100 |
| MCB1EB_1002 | rpsU            | Uncharacterized conserved protein                                                                | 100    | -     | -   |
| MCB1EB_1003 | -               | Ribosomal protein S21                                                                            | 100    | 96    | 100 |
| MCB1EB_1004 | dnaG            | Uncharacterized conserved protein                                                                | 100    | 68    | 96  |
| MCB1EB_1005 | rpoD            | DNA primase (bacterial type)                                                                     | 100    | 66    | 99  |
| MCB1EB_1006 | -               | DNA-directed RNA polymerase, sigma subunit (sigma70/sigma32)                                     | 100    | 79    | 94  |
| MCB1EB_1007 | -               | Uncharacterized protein, possibly involved in aromatic compounds catabolism                      | 100    | -     | -   |
| MCB1EB_1008 | -               | Predicted aminomethyltransferase related to GcvT                                                 | 100    | -     | -   |
| MCB1EB_1009 | tmk             | Predicted periplasmic solute-binding protein                                                     | 100    | 56    | 88  |
| MCB1EB_1010 | ho1B            | Thymidylate kinase                                                                               | 100    | 67    | 99  |
| MCB1EB_1011 | BC1002_1487     | ATPase involved in DNA replication                                                               | 100    | 56    | 98  |
| MCB1EB_1012 | -               | Sortase and related acyltransferases                                                             | 100    | -     | -   |
| MCB1EB_1013 | l634_08040      | Mg-dependent DNase                                                                               | 100    | 70    | 96  |
| MCB1EB_1014 | -               | Predicted acyltransferases                                                                       | 100    | -     | -   |
| MCB1EB_1015 | GWL_35760       | Hypothetical protein                                                                             | -      | -     | -   |
| MCB1EB_1016 | KYG_08880       | Hypothetical protein                                                                             | 100    | 36    | 89  |
| MCB1EB_1017 | -               | Predicted transcriptional regulators                                                             | -      | -     | -   |
| MCB1EB_1018 | Jab_2c03390     | Hypothetical protein                                                                             | 100    | -     | -   |
| MCB1EB_1019 | PMI35_04561     | Transcriptional regulator                                                                        | 100    | -     | -   |
| MCB1EB_1020 | Nit79A3_1107    | Anti-sigma factor                                                                                | 100    | -     | -   |
| MCB1EB_1021 | istB            | Membrane protein involved in the export of O-antigen and teichoic acid                           | -      | -     | -   |
| MCB1EB_1022 | -               | Transposase and inactivated derivatives                                                          | -      | 42    | -   |
| MCB1EB_1023 | Halhy_2265      | Transposase and inactivated derivatives                                                          | 100    | -     | -   |
| MCB1EB_1024 | nusG            | Predicted NTPase (NACHT family)                                                                  | 66-91  | -     | -   |
| MCB1EB_1025 | -               | Transcription antiterminator                                                                     | -      | -     | -   |
| MCB1EB_1026 | -               | Hypothetical protein                                                                             | -      | -     | -   |
| MCB1EB_1027 | -               | Nucleotidyltransferase/DNA polymerase involved in DNA repair                                     | -      | 69    | -   |
| MCB1EB_1028 | traC            | DNA polymerase III, alpha subunit                                                                | -      | 78    | -   |
| MCB1EB_1029 | CC1G_08648      | Uncharacterized protein conserved in bacteria                                                    | -      | -     | -   |
| MCB1EB_1030 | TVY486_1109920  | ABC-type multidrug transport system, ATPase and permease components                              | -      | -     | -   |
| MCB1EB_1031 | PMI16_02591     | Hypothetical protein                                                                             | 100    | -     | -   |
| MCB1EB_1032 | CELE_F35C5.3    | Signal transduction histidine kinase                                                             | 100    | -     | -   |
| MCB1EB_1033 | -               | Autotransporter adhesin                                                                          | 100    | -     | -   |
| MCB1EB_1034 | -               | Hypothetical protein                                                                             | 100    | 53    | 100 |
| MCB1EB_1035 | M942_23135      | Chromosome segregation ATPases                                                                   | 100    | 68    | 100 |
| MCB1EB_1036 | PMI06_003799    | Uncharacterized conserved small protein                                                          | 100    | -     | -   |
| MCB1EB_1037 | dapC            | Permeases of the drug/metabolite transporter (DMT) superfamily                                   | 100    | -     | -   |
| MCB1EB_1038 | dapD            | Aspartate/tyrosine/aromatic aminotransferase                                                     | 100    | 69    | 99  |
| MCB1EB_1039 | -               | Tetrahydrodipicolinate N-succinyltransferase                                                     | 100    | 78    | 100 |
| MCB1EB_1040 | dapE            | Arsenate reductase and related proteins, glutaredoxin family                                     | 100    | 58    | 96  |
| MCB1EB_1041 | yfcB            | Acetylornithine deacetylase/Succinyl-diaminopimelate desuccinylase and related deacylases        | 98     | 70    | 97  |
| MCB1EB_1042 | cls             | Methylase of polypeptide chain release factors                                                   | 100    | -     | -   |
| MCB1EB_1043 | -               | Phosphatidylserine-phosphatidylglycerophosphate/cardiolipin synthases and related enzymes        | 100    | 63    | 100 |
| MCB1EB_1044 | BURMUCGD2M_1311 | ATPase components of ABC transporters with duplicated ATPase domains                             | 100    | 68    | 100 |
| MCB1EB_1045 | CFU_3359        | Hypothetical protein                                                                             | 100    | -     | -   |
| MCB1EB_1046 | PMI24_05069     | Hypothetical protein                                                                             | 100    | -     | -   |
| MCB1EB_1047 | RBRH_02472      | Uncharacterized protein conserved in bacteria                                                    | 100    | -     | -   |
| MCB1EB_1048 | RBRH_02471      | ATPases involved in chromosome partitioning                                                      | -      | 70    | -   |
| MCB1EB_1049 | HCH_03142       | Uncharacterized conserved protein                                                                | -      | 65    | -   |
| MCB1EB_1050 | Npun_F1222      | Histidyl-tRNA synthetase                                                                         | -      | -     | -   |
| MCB1EB_1051 | -               | Predicted NTPase (NACHT family)                                                                  | 78-96  | -     | -   |
| MCB1EB_1052 | RBRH_01189      | Transposase and inactivated derivatives                                                          | -      | -     | -   |
| MCB1EB_1053 | RoseRS_4025     | Superfamily II helicase, archaea-specific                                                        | -      | -     | -   |
| MCB1EB_1054 | -               | Predicted NTPase (NACHT family)                                                                  | 66-91  | -     | -   |
| MCB1EB_1055 | -               | Predicted nucleoside-diphosphate sugar epimerase                                                 | 100    | -     | -   |
| MCB1EB_1056 | PSE_3910        | Dehydrogenases with different specificities (related to short-chain alcohol dehydrogenases)      | 100    | -     | -   |
| MCB1EB_1057 | -               | Predicted ATPase                                                                                 | -      | -     | -   |
| MCB1EB_1058 | -               | Bacterial lipocalin                                                                              | 100    | -     | -   |
| MCB1EB_1059 | C380_16345      | Predicted membrane protein                                                                       | -      | -     | -   |
| MCB1EB_1060 | Halhy_2265      | Predicted NAD/FAD-dependent oxidoreductase                                                       | 86     | -     | -   |
| MCB1EB_1061 | -               | Predicted NTPase (NACHT family)                                                                  | 99-100 | -     | -   |
| MCB1EB_1062 | -               | Transposase and inactivated derivatives                                                          | 97     | -     | -   |
| MCB1EB_1063 | -               | Transposase and inactivated derivatives                                                          | -      | -     | -   |
| MCB1EB_1064 | LYNGBM3L_24300  | Uncharacterized conserved protein                                                                | 100    | 61    | 96  |
| MCB1EB_1065 | tnpA            | Predicted NTPase (NACHT family)                                                                  | 70-100 | -     | -   |
| MCB1EB_1066 | VCHENC01_3983   | ABC-type Fe3+-siderophore transport system, permease component                                   | 100    | -     | -   |

|             |                       |                                                                                                                                                                |        |       |     |
|-------------|-----------------------|----------------------------------------------------------------------------------------------------------------------------------------------------------------|--------|-------|-----|
| MCB1EB_1067 | GSPATT00025202001     | Predicted unusual protein kinase                                                                                                                               | -      | -     | -   |
| MCB1EB_1068 | -                     | Predicted NTPase (NACHT family)                                                                                                                                | -      | -     | -   |
| MCB1EB_1069 | lysC                  | Integrase                                                                                                                                                      | -      | -     | -   |
| MCB1EB_1070 | BUPH_02948            | Aspartokinases                                                                                                                                                 | 97     | 82    | 99  |
| MCB1EB_1071 | RBRH_00578            | Permeases of the drug/metabolite transporter (DMT) superfamily                                                                                                 | 89     | -     | 93  |
| MCB1EB_1072 | -                     | Non-ribosomal peptide synthetase modules and related proteins                                                                                                  | -      | -     | -   |
| MCB1EB_1073 | CAGGBEG34_30027       | Thioesterase domains of type I polyketide synthases or non-ribosomal peptide synthetases                                                                       | -      | -     | -   |
| MCB1EB_1074 | -                     | Retron-type reverse transcriptase                                                                                                                              | 96     | 31    | -   |
| MCB1EB_1075 | tilS                  | Transposase and inactivated derivatives                                                                                                                        | 100    | 65    | -   |
| MCB1EB_1076 | accA                  | Predicted ATPase of the PP-loop superfamily implicated in cell cycle control                                                                                   | 100    | 47    | 99  |
| MCB1EB_1077 | -                     | Acetyl-CoA carboxylase alpha subunit                                                                                                                           | 100    | 88    | 97  |
| MCB1EB_1078 | cysS                  | 3-methyladenine DNA glycosylase/8-oxoguanine DNA glycosylase                                                                                                   | 100    | -     | -   |
| MCB1EB_1079 | RBRH_03961            | CysteinyI-rRNA synthetase                                                                                                                                      | 100    | 70    | 100 |
| MCB1EB_1080 | ppiB                  | FOG: TPR repeat                                                                                                                                                | 100    | -     | -   |
| MCB1EB_1081 | -                     | Peptidyl-prolyl cis-trans isomerase (rotamase) - cyclophilin family                                                                                            | 100    | 75    | 99  |
| MCB1EB_1082 | BN668_01709           | Uncharacterized protein conserved in bacteria                                                                                                                  | 99     | 54    | 97  |
| MCB1EB_1083 | PROVALCAL_01421       | Glycosyltransferase                                                                                                                                            | -      | -     | -   |
| MCB1EB_1084 | -                     | L-alanine-DL-glutamate epimerase and related enzymes of enolase superfamily                                                                                    | -      | -     | -   |
| MCB1EB_1085 | Hally_2265            | Transposase and inactivated derivatives                                                                                                                        | 100    | 60    | 75  |
| MCB1EB_1086 | -                     | Predicted NTPase (NACHT family)                                                                                                                                | 99     | -     | -   |
| MCB1EB_1087 | subB                  | rRNA methylase                                                                                                                                                 | 99     | 66    | 91  |
| MCB1EB_1088 | U875_08940            | Archaeal fructose-1,6-bisphosphatase and related enzymes of inositol monophosphatase family                                                                    | 100    | 76    | 98  |
| MCB1EB_1089 | RBRH_03529            | Diacylglycerol kinase                                                                                                                                          | 100    | -     | -   |
| MCB1EB_1090 | -                     | Phosphoglycerol transferase and related proteins, alkaline phosphatase superfamily                                                                             | 100    | -     | 98  |
| MCB1EB_1091 | -                     | Predicted ATPase                                                                                                                                               | 100    | 73    | 100 |
| MCB1EB_1092 | sucB                  | Pyruvate/2-oxoglutarate dehydrogenase complex, dihydroliipoamide dehydrogenase (E3) component, and related enzymes                                             | 100    | 79    | 100 |
| MCB1EB_1093 | sucA                  | Pyruvate/2-oxoglutarate dehydrogenase complex, dihydroliipoamide acyltransferase (E2) component, and related enzymes                                           | 100    | 73    | 100 |
| MCB1EB_1094 | fdx-1                 | 2-oxoglutarate dehydrogenase complex, dehydrogenase (E1) component, and related enzymes                                                                        | 100    | 87    | 86  |
| MCB1EB_1095 | hscA                  | Ferredoxin                                                                                                                                                     | 100    | 70    | 100 |
| MCB1EB_1096 | hscB                  | Molecular chaperone                                                                                                                                            | 100    | 70    | 100 |
| MCB1EB_1097 | -                     | DnaJ-domain-containing proteins 1                                                                                                                              | 100    | 57    | 100 |
| MCB1EB_1098 | -                     | Uncharacterized conserved protein                                                                                                                              | 100    | 86    | 100 |
| MCB1EB_1099 | iscS                  | NiFU homolog involved in Fe-S cluster formation                                                                                                                | 100    | 88    | 96  |
| MCB1EB_1100 | -                     | Cysteine sulfinate desulfinate/cysteine desulfurase and related enzymes                                                                                        | 100    | 83    | 100 |
| MCB1EB_1101 | bglu_1g19220          | Predicted transcriptional regulator                                                                                                                            | 100    | 74    | 98  |
| MCB1EB_1102 | BgramDRAFT_5853       | Permeases of the major facilitator superfamily                                                                                                                 | 100    | 31-32 | -   |
| MCB1EB_1103 | -                     | Predicted membrane protein                                                                                                                                     | 98     | 49    | 94  |
| MCB1EB_1104 | -                     | Predicted transcriptional regulators                                                                                                                           | 100    | -     | -   |
| MCB1EB_1105 | -                     | Uncharacterized protein related to capsule biosynthesis enzymes                                                                                                | 100    | -     | -   |
| MCB1EB_1106 | -                     | Uncharacterized protein conserved in bacteria                                                                                                                  | 100    | 59    | 86  |
| MCB1EB_1107 | -                     | Uncharacterized protein conserved in bacteria                                                                                                                  | 100    | 50    | 82  |
| MCB1EB_1108 | HNWD1                 | Uncharacterized protein involved in formation of curli polymers                                                                                                | 91     | 73    | 85  |
| MCB1EB_1109 | leuA                  | Predicted NTPase (NACHT family)                                                                                                                                | 99-100 | -     | -   |
| MCB1EB_1110 | psaA                  | Isopropylmalate/homocitrate/citramalate synthases                                                                                                              | 100    | 79    | 100 |
| MCB1EB_1111 | psd                   | Phosphatidylserine synthase                                                                                                                                    | 100    | 75    | 98  |
| MCB1EB_1112 | ilvC                  | Phosphatidylserine decarboxylase                                                                                                                               | 100    | 72    | 100 |
| MCB1EB_1113 | ilvH                  | Ketol-acid reductoisomerase                                                                                                                                    | 100    | 85    | 100 |
| MCB1EB_1114 | ilvB                  | Acetolactate synthase, small (regulatory) subunit                                                                                                              | 100    | 82    | 100 |
| MCB1EB_1115 | -                     | Thiamine pyrophosphate-requiring enzymes [acetolactate synthase, pyruvate dehydrogenase (cytochrome), glyoxylate carboligase, phosphonopyruvate decarboxylase] | 100    | 82    | 99  |
| MCB1EB_1116 | Bphy_2024             | DNA-directed RNA polymerase specialized sigma subunit, sigma24 homolog                                                                                         | 100    | 72    | 100 |
| MCB1EB_1117 | BCh11DRAFT_00132      | Hypothetical protein                                                                                                                                           | 100    | 50    | 98  |
| MCB1EB_1118 | -                     | Hypothetical protein                                                                                                                                           | 100    | -     | -   |
| MCB1EB_1119 | BUPH_00305            | Transcriptional regulator                                                                                                                                      | 100    | 79    | 97  |
| MCB1EB_1120 | -                     | Mu-like prophage protein                                                                                                                                       | 100    | 34    | 99  |
| MCB1EB_1121 | N234_09080            | Hypothetical protein                                                                                                                                           | 100    | -     | -   |
| MCB1EB_1122 | -                     | Uncharacterized conserved protein                                                                                                                              | -      | -     | -   |
| MCB1EB_1123 | RBRH_01044            | Pirin-related protein                                                                                                                                          | 100    | 42    | 96  |
| MCB1EB_1124 | RBRH_01045            | Uncharacterized enzyme of heme biosynthesis                                                                                                                    | 100    | 57    | 99  |
| MCB1EB_1125 | BgramDRAFT_1913       | Uncharacterized enzyme of heme biosynthesis                                                                                                                    | 100    | -     | -   |
| MCB1EB_1126 | hemC                  | Uroporphyrinogen-III synthase                                                                                                                                  | 100    | -     | -   |
| MCB1EB_1127 | SG0735                | Porphobilinogen deaminase                                                                                                                                      | 100    | -     | -   |
| MCB1EB_1128 | argH                  | Uncharacterized conserved protein                                                                                                                              | 100    | 33-35 | -   |
| MCB1EB_1129 | ldcC                  | Argininosuccinate lyase                                                                                                                                        | 100    | 78    | 86  |
| MCB1EB_1130 | ded                   | Arginine/lysine/ornithine decarboxylases                                                                                                                       | 100    | 86    | 100 |
| MCB1EB_1131 | RoseRS_4025           | Deoxycytidine deaminase                                                                                                                                        | 100    | 90    | 99  |
| MCB1EB_1132 | -                     | Predicted NTPase (NACHT family)                                                                                                                                | -      | -     | -   |
| MCB1EB_1133 | RBRH_00037            | ABC-type transport system involved in Fe-S cluster assembly, permease and ATPase components                                                                    | 100    | 66    | 94  |
| MCB1EB_1134 | RBRH_03890            | Hypothetical protein                                                                                                                                           | 100    | 59-65 | -   |
| MCB1EB_1135 | -                     | Hypothetical protein                                                                                                                                           | 100    | 59    | 100 |
| MCB1EB_1136 | RBRH_03890            | Hypothetical protein                                                                                                                                           | -      | 63    | -   |
| MCB1EB_1137 | CAGGBEG34_550003      | Nitrate reductase beta subunit                                                                                                                                 | 100    | -     | -   |
| MCB1EB_1138 | mrp                   | Cu/Zn superoxide dismutase                                                                                                                                     | 100    | 46    | 91  |
| MCB1EB_1139 | -                     | ATPases involved in chromosome partitioning                                                                                                                    | 100    | 72    | 85  |
| MCB1EB_1140 | OR16_03807            | Outer membrane protein and related peptidoglycan-associated (lipo)proteins                                                                                     | 100    | 64    | 96  |
| MCB1EB_1141 | RALTA_B0823           | Spermidine/putrescine-binding periplasmic protein                                                                                                              | -      | -     | -   |
| MCB1EB_1142 | OR16_03807            | Transcriptional regulator                                                                                                                                      | -      | 42    | -   |
| MCB1EB_1143 | L810_8411             | Spermidine/putrescine-binding periplasmic protein                                                                                                              | 100    | -     | -   |
| MCB1EB_1144 | D769_12681            | Transcriptional regulator                                                                                                                                      | 93     | 32    | 86  |
| MCB1EB_1145 | Cagg_1814             | Na <sup>+</sup> /citrate symporter                                                                                                                             | 84-86  | 53-54 | -   |
| MCB1EB_1146 | Te00.1047053511557.50 | Predicted NTPase (NACHT family)                                                                                                                                | -      | -     | -   |
| MCB1EB_1147 | MetexDRAFT_1696       | Predicted transcriptional regulators                                                                                                                           | -      | -     | -   |
| MCB1EB_1148 | metG                  | Hypothetical protein                                                                                                                                           | -      | -     | -   |
| MCB1EB_1149 | Bphyt_1014            | Methionyl-rRNA synthetase                                                                                                                                      | 100    | 75    | 99  |
| MCB1EB_1150 | -                     | Uncharacterized protein conserved in bacteria                                                                                                                  | 100    | 47    | 95  |
| MCB1EB_1151 | -                     | Outer membrane protein                                                                                                                                         | 100    | 59    | 96  |
| MCB1EB_1152 | -                     | Hypothetical protein                                                                                                                                           | 100    | 74    | 93  |
| MCB1EB_1153 | panC                  | Uncharacterized conserved protein                                                                                                                              | 100    | 75    | 90  |
| MCB1EB_1154 | panD                  | Panthothenate synthetase                                                                                                                                       | 100    | 69    | 100 |
| MCB1EB_1155 | K788_8069             | Aspartate 1-decarboxylase                                                                                                                                      | 100    | 77    | 100 |
| MCB1EB_1156 | OR16_03807            | ABC-type Fe <sup>2+</sup> -hydroxamate transport system, periplasmic component                                                                                 | 100    | 50    | 93  |
| MCB1EB_1157 | WQE_37849             | Spermidine/putrescine-binding periplasmic protein                                                                                                              | 99-100 | -     | -   |
| MCB1EB_1158 | -                     | Transcriptional regulator                                                                                                                                      | -      | -     | -   |
| MCB1EB_1159 | U875_17425            | Transcriptional regulator                                                                                                                                      | -      | -     | -   |
| MCB1EB_1160 | Tery_1841             | Spermidine/putrescine-binding periplasmic protein                                                                                                              | -      | -     | -   |
| MCB1EB_1161 | Entel_4309            | FOG: HEAT repeat                                                                                                                                               | -      | -     | -   |

|             |                    |                                                                                                                                                                  |       |    |     |
|-------------|--------------------|------------------------------------------------------------------------------------------------------------------------------------------------------------------|-------|----|-----|
| MCB1EB_1162 | D781_0052          | Response regulator containing CheY-like receiver domain and AraC-type DNA-binding domain                                                                         | -     | -  | -   |
| MCB1EB_1163 | F504_865           | Hypothetical protein                                                                                                                                             | -     | -  | -   |
| MCB1EB_1164 | -                  | Large exoproteins involved in heme utilization or adhesion                                                                                                       | -     | -  | -   |
| MCB1EB_1165 | RSPO_m00925        | 18 : Unknown function                                                                                                                                            | 100   | -  | -   |
| MCB1EB_1166 | PTE_02404          | Large exoproteins involved in heme utilization or adhesion                                                                                                       | -     | -  | -   |
| MCB1EB_1167 | RSPO_m00925        | Hypothetical protein                                                                                                                                             | -     | -  | -   |
| MCB1EB_1168 | -                  | Large exoproteins involved in heme utilization or adhesion                                                                                                       | -     | -  | -   |
| MCB1EB_1169 | H045_00290         | Transposase and inactivated derivatives, IS5 family                                                                                                              | -     | 82 | -   |
| MCB1EB_1170 | TKWG_21470         | Large exoproteins involved in heme utilization or adhesion                                                                                                       | -     | -  | -   |
| MCB1EB_1171 | aroC               | Large exoproteins involved in heme utilization or adhesion                                                                                                       | -     | -  | -   |
| MCB1EB_1172 | -                  | Chorismate synthase                                                                                                                                              | 100   | 82 | 100 |
| MCB1EB_1173 | pdhD               | FOG: CBS domain                                                                                                                                                  | 100   | 75 | 99  |
| MCB1EB_1174 | -                  | Pyruvate/2-oxoglutarate dehydrogenase complex, dihydrolipoamide dehydrogenase (E3) component, and related enzymes                                                | 100   | 78 | 97  |
| MCB1EB_1175 | aceE               | Pyruvate/2-oxoglutarate dehydrogenase complex, dihydrolipoamide acyltransferase (E2) component, and related enzymes                                              | 100   | -  | -   |
| MCB1EB_1176 | folD               | Pyruvate dehydrogenase complex, dehydrogenase (E1) component                                                                                                     | 100   | 83 | 100 |
| MCB1EB_1177 | prfC               | 5,10-methylene-tetrahydrofolate dehydrogenase/Methenyl tetrahydrofolate cyclohydrolase                                                                           | 100   | 78 | 97  |
| MCB1EB_1178 | SRU_2653           | Zn-dependent oligopeptidases                                                                                                                                     | 100   | 74 | 99  |
| MCB1EB_1179 | TNMX_08450         | Putative dehydrogenase domain of multifunctional non-ribosomal peptide synthetases and related enzymes                                                           | 100   | -  | -   |
| MCB1EB_1180 | TSTA_059840        | Antitoxin of toxin-antitoxin stability system                                                                                                                    | 100   | -  | -   |
| MCB1EB_1181 | SERLA73DRAFT_77359 | Predicted NTPase (NACHT family)                                                                                                                                  | 92-93 | -  | -   |
| MCB1EB_1182 | GGTG_12522         | Thiamine pyrophosphate-requiring enzymes [acetolactate synthase, pyruvate dehydrogenase (cytochrome), glyoxylate carboxylase, phosphoenolpyruvate decarboxylase] | -     | -  | -   |
| MCB1EB_1183 | BRAFLDRAFT_98235   | Hypothetical protein                                                                                                                                             | -     | -  | -   |
| MCB1EB_1184 | BgramDRAFT_3627    | Hypothetical protein                                                                                                                                             | -     | -  | -   |
| MCB1EB_1185 | -                  | Hypothetical protein                                                                                                                                             | 100   | -  | -   |
| MCB1EB_1186 | BC1003_2657        | Acyl carrier protein                                                                                                                                             | 100   | -  | -   |
| MCB1EB_1187 | hutH               | Acyl-coenzyme A synthetases/AMP-(fatty) acid ligases                                                                                                             | 100   | -  | -   |
| MCB1EB_1188 | -                  | Histidine ammonia-lyase                                                                                                                                          | 100   | 34 | 88  |
| MCB1EB_1189 | -                  | Predicted thioesterase                                                                                                                                           | 100   | -  | -   |
| MCB1EB_1190 | K788_3336          | 3-oxoacyl-(acyl-carrier-protein) synthase                                                                                                                        | 100   | 91 | -   |
| MCB1EB_1191 | fabG               | Predicted 3-hydroxyacyl-(acyl carrier protein) dehydratase                                                                                                       | 100   | -  | -   |
| MCB1EB_1192 | RoseRS_4025        | Dehydrogenases with different specificities (related to short-chain alcohol dehydrogenases)                                                                      | 100   | -  | -   |
| MCB1EB_1193 | -                  | Predicted NTPase (NACHT family)                                                                                                                                  | 66-91 | -  | -   |
| MCB1EB_1194 | -                  | ABC-type branched-chain amino acid transport systems, periplasmic component                                                                                      | 96    | -  | -   |
| MCB1EB_1195 | N878_22445         | Multidrug resistance efflux pump                                                                                                                                 | 100   | 63 | 99  |
| MCB1EB_1196 | mutS               | Uncharacterized conserved small protein                                                                                                                          | 100   | -  | -   |
| MCB1EB_1197 | slyD               | Mismatch repair ATPase (MutS family)                                                                                                                             | 97    | 72 | 97  |
| MCB1EB_1198 | CAGGBEG34_200032   | FKBP-type peptidyl-prolyl cis-trans isomerases 2                                                                                                                 | 100   | 65 | 92  |
| MCB1EB_1199 | MYA_1877           | Predicted small secreted protein                                                                                                                                 | -     | -  | -   |
| MCB1EB_1200 | dapA               | Uncharacterized lipoprotein                                                                                                                                      | 100   | -  | -   |
| MCB1EB_1201 | trpS               | Dihydrodipicolinate synthase/N-acetylneuraminatase lyase                                                                                                         | 100   | 72 | 96  |
| MCB1EB_1202 | -                  | Tryptophanyl-tRNA synthetase                                                                                                                                     | 100   | 86 | 100 |
| MCB1EB_1203 | -                  | Zn-dependent proteases                                                                                                                                           | 100   | 66 | 99  |
| MCB1EB_1204 | bgla_1g27740       | Predicted metal-dependent phosphoesterases (PHP family)                                                                                                          | 100   | 65 | 100 |
| MCB1EB_1205 | mseL               | Hypothetical protein                                                                                                                                             | 100   | -  | -   |
| MCB1EB_1206 | -                  | Large-conductance mechanosensitive channel                                                                                                                       | 100   | 71 | 99  |
| MCB1EB_1207 | -                  | D-alanyl-D-alanine carboxypeptidase                                                                                                                              | 100   | 67 | 76  |
| MCB1EB_1208 | -                  | ABC-type spermidine/putrescine transport system, permease component II                                                                                           | 96    | -  | -   |
| MCB1EB_1209 | -                  | ABC-type spermidine/putrescine transport system, permease component I                                                                                            | 100   | -  | -   |
| MCB1EB_1210 | -                  | ABC-type spermidine/putrescine transport systems, ATPase components                                                                                              | 100   | -  | -   |
| MCB1EB_1211 | HMPREF0731_1372    | Spermidine/putrescine-binding periplasmic protein                                                                                                                | 93    | -  | -   |
| MCB1EB_1212 | STRIC_0577         | Predicted flavoprotein                                                                                                                                           | 100   | -  | -   |
| MCB1EB_1213 | pyrD               | Glutathione S-transferase                                                                                                                                        | 100   | -  | -   |
| MCB1EB_1214 | pyrD               | Dihydroorotate dehydrogenase                                                                                                                                     | 100   | -  | 96  |
| MCB1EB_1215 | -                  | Dihydroorotate dehydrogenase                                                                                                                                     | -     | -  | -   |
| MCB1EB_1216 | -                  | NADPH-dependent glutamate synthase beta chain and related oxidoreductases                                                                                        | 100   | 78 | 100 |
| MCB1EB_1217 | -                  | Transposase and inactivated derivatives                                                                                                                          | -     | -  | -   |
| MCB1EB_1218 | -                  | Transposase and inactivated derivatives                                                                                                                          | -     | -  | -   |
| MCB1EB_1219 | tnpA2              | Transposase and inactivated derivatives                                                                                                                          | -     | -  | -   |
| MCB1EB_1220 | -                  | Hypothetical protein                                                                                                                                             | -     | 64 | -   |
| MCB1EB_1221 | CNE_BB1p04810      | Transposase and inactivated derivatives                                                                                                                          | -     | -  | -   |
| MCB1EB_1222 | -                  | Transposase and inactivated derivatives                                                                                                                          | -     | -  | -   |
| MCB1EB_1223 | -                  | Hypothetical protein                                                                                                                                             | -     | -  | -   |
| MCB1EB_1224 | PMI24_02838        | Transposase and inactivated derivatives                                                                                                                          | -     | -  | -   |
| MCB1EB_1225 | -                  | Hypothetical protein                                                                                                                                             | -     | -  | -   |
| MCB1EB_1226 | CARN7_2937         | Integrase                                                                                                                                                        | 95    | -  | -   |
| MCB1EB_1227 | -                  | Transposase and inactivated derivatives                                                                                                                          | -     | -  | -   |
| MCB1EB_1228 | CARN7_2937         | Transposase and inactivated derivatives                                                                                                                          | -     | -  | -   |
| MCB1EB_1229 | -                  | Hypothetical protein                                                                                                                                             | -     | -  | -   |
| MCB1EB_1230 | CARN7_2937         | Transposase and inactivated derivatives                                                                                                                          | 100   | 65 | -   |
| MCB1EB_1231 | -                  | Predicted glutamine amidotransferase                                                                                                                             | -     | -  | -   |
| MCB1EB_1232 | gltX               | DNA replication protein                                                                                                                                          | -     | -  | -   |
| MCB1EB_1233 | -                  | Glutamyl- and glutamyl-tRNA synthetases                                                                                                                          | 94    | 75 | 84  |
| MCB1EB_1234 | -                  | Transposase and inactivated derivatives, IS5 family                                                                                                              | -     | -  | -   |
| MCB1EB_1235 | -                  | ABC-type Fe3+ transport system, periplasmic component                                                                                                            | -     | -  | -   |
| MCB1EB_1236 | -                  | Cell wall-associated hydrolases (invasion-associated proteins)                                                                                                   | 100   | 61 | 96  |
| MCB1EB_1237 | -                  | ABC-type uncharacterized transport system, duplicated ATPase component                                                                                           | 100   | 66 | 99  |
| MCB1EB_1238 | -                  | ABC-type uncharacterized transport system, permease component                                                                                                    | 100   | 70 | 95  |
| MCB1EB_1239 | -                  | ABC-type uncharacterized transport system, permease component                                                                                                    | 100   | 76 | 100 |
| MCB1EB_1240 | fabI               | ABC-type oligopeptide transport system, periplasmic component                                                                                                    | 95    | 63 | 92  |
| MCB1EB_1241 | N9414_09841        | Enoyl-[acyl-carrier-protein] reductase (NADH)                                                                                                                    | 100   | 80 | 100 |
| MCB1EB_1242 | -                  | Predicted NTPase (NACHT family)                                                                                                                                  | 100   | -  | -   |
| MCB1EB_1243 | glnA1              | Rhodanese-related sulfurtransferase                                                                                                                              | 100   | 59 | 99  |
| MCB1EB_1244 | -                  | Glutamine synthetase                                                                                                                                             | 100   | 88 | 100 |
| MCB1EB_1245 | XSR1_50074         | Tellurite resistance protein and related permeases                                                                                                               | 100   | -  | -   |
| MCB1EB_1246 | -                  | Hypothetical protein                                                                                                                                             | -     | 30 | -   |
| MCB1EB_1247 | -                  | Transposase and inactivated derivatives, IS5 family                                                                                                              | -     | 82 | -   |
| MCB1EB_1248 | -                  | Stress-induced morphogen (activity unknown)                                                                                                                      | 100   | 61 | 89  |
| MCB1EB_1249 | -                  | Intracellular septation protein A                                                                                                                                | 100   | 60 | 100 |
| MCB1EB_1250 | purL               | Conserved domain frequently associated with peptide methionine sulfoxide reductase                                                                               | 100   | 66 | 96  |
| MCB1EB_1251 | Mfla_0907          | Phosphoribosylformylglycinamide (FGAM) synthase, synthetase domain                                                                                               | 100   | 72 | 100 |
| MCB1EB_1252 | M23134_05452       | Predicted transcriptional regulator                                                                                                                              | -     | -  | -   |
| MCB1EB_1253 | -                  | Leucine-rich repeat (LRR) protein                                                                                                                                | -     | -  | -   |
| MCB1EB_1254 | NB231_14001        | Transposase and inactivated derivatives                                                                                                                          | -     | -  | -   |

|             |                  |                                                                                        |        |       |       |
|-------------|------------------|----------------------------------------------------------------------------------------|--------|-------|-------|
| MCBIEB_1255 | S7335_4732       | Transposase and inactivated derivatives                                                | -      | -     | -     |
| MCBIEB_1256 | pgi              | Leucine-rich repeat (LRR) protein                                                      | -      | -     | -     |
| MCBIEB_1257 | BamMC406_1833    | Glucose-6-phosphate isomerase                                                          | 100    | 67    | 99    |
| MCBIEB_1258 | A11_05390        | Glycine/D-amino acid oxidases (deaminating)                                            | 100    | -     | -     |
| MCBIEB_1259 | RBRH_01614       | Preprotein translocase subunit SecA (ATPase, RNA helicase)                             | -      | -     | -     |
| MCBIEB_1260 | lon              | Parvulin-like peptidyl-prolyl isomerase                                                | 100    | -     | 99    |
| MCBIEB_1261 | clpX             | ATP-dependent Lon protease, bacterial type                                             | 100    | 85    | 100   |
| MCBIEB_1262 | clpP             | ATP-dependent protease Clp, ATPase subunit                                             | 100    | 86    | 93    |
| MCBIEB_1263 | tig              | Protease subunit of ATP-dependent Clp proteases                                        | 100    | 83    | 100   |
| MCBIEB_1264 | gyrB             | FKBP-type peptidyl-prolyl cis-trans isomerase (trigger factor)                         | 100    | 56    | 99    |
| MCBIEB_1265 | HMPREF1015_00064 | Type IIA topoisomerase (DNA gyrase/topo II, topoisomerase IV), B subunit               | -      | -     | -     |
| MCBIEB_1266 | trxA             | Cytotoxic translational repressor of toxin-antitoxin stability system                  | -      | -     | -     |
| MCBIEB_1267 | rho              | Thiol-disulfide isomerase and thioredoxins                                             | 100    | 70    | 100   |
| MCBIEB_1268 | rpmE             | Transcription termination factor                                                       | 100    | 94    | 100   |
| MCBIEB_1269 | -                | Ribosomal protein L31                                                                  | 100    | -     | -     |
| MCBIEB_1270 | MYA_3532         | 4-amino-4-deoxy-L-arabinose transferase and related glycosyltransferases of PMT family | 100    | 64    | 99    |
| MCBIEB_1271 | int              | Permeases of the major facilitator superfamily                                         | 100    | -     | -     |
| MCBIEB_1272 | bglu_1g03560     | Integrase                                                                              | -      | 27    | -     |
| MCBIEB_1273 | uvrB             | Hypothetical protein                                                                   | -      | -     | -     |
| MCBIEB_1274 | RBRH_00570       | Low specificity phosphatase (HAD superfamily)                                          | -      | -     | -     |
| MCBIEB_1275 | CAGGBEG34_610004 | Na <sup>+</sup> /citrate symporter                                                     | 99-100 | 49-53 | -     |
| MCBIEB_1276 | L332_13090       | Lhr-like helicases                                                                     | -      | 41    | -     |
| MCBIEB_1277 | CAGGBEG34_190021 | Glycyl-tRNA synthetase, beta subunit                                                   | -      | -     | -     |
| MCBIEB_1278 | atpA             | Phage-related protein, predicted endonuclease                                          | -      | -     | -     |
| MCBIEB_1279 | CAGGBEG34_190142 | Excinuclease ATPase subunit                                                            | -      | -     | -     |
| MCBIEB_1280 | Acix9_3324       | Hypothetical protein                                                                   | 100    | -     | -     |
| MCBIEB_1281 | BURPS668_A2366   | Phage anti-repressor protein                                                           | 99     | -     | -     |
| MCBIEB_1282 | O991_02545       | Predicted transcriptional regulator                                                    | -      | -     | -     |
| MCBIEB_1283 | V757_00985       | Phosphatidylinositol kinase and protein kinases of the PI-3 kinase family              | -      | -     | -     |
| MCBIEB_1284 | B1A_21845        | Hypothetical protein                                                                   | -      | -     | -     |
| MCBIEB_1285 | CAGGBEG34_330013 | Uncharacterized protein conserved in bacteria                                          | -      | -     | -     |
| MCBIEB_1286 | BDB_30040        | Acyl-CoA dehydrogenases                                                                | -      | -     | -     |
| MCBIEB_1287 | CAGGBEG34_330022 | Holliday junction resolvase                                                            | 99     | -     | -     |
| MCBIEB_1288 | KYC_12668        | Pyruvate-phosphate lyase-activating enzyme                                             | -      | -     | -     |
| MCBIEB_1289 | N234_18785       | Hypothetical protein                                                                   | 99     | -     | -     |
| MCBIEB_1290 | -                | Predicted NAD/FAD-binding protein                                                      | 100    | -     | -     |
| MCBIEB_1291 | -                | Uncharacterized protein conserved in bacteria                                          | 89-100 | 31    | -     |
| MCBIEB_1292 | XFEF_01759       | Uncharacterized protein conserved in bacteria                                          | 100    | -     | -     |
| MCBIEB_1293 | BC1002_6545      | Uncharacterized protein, homolog of phage Mu protein gp30                              | 100    | 29    | -     |
| MCBIEB_1294 | Xf_1576          | Uncharacterized protein conserved in bacteria                                          | 100    | -     | -     |
| MCBIEB_1295 | BC1002_6547      | Hypothetical protein                                                                   | -      | -     | -     |
| MCBIEB_1296 | BC1002_6549      | Uncharacterized protein conserved in bacteria                                          | 99     | -     | -     |
| MCBIEB_1297 | gene0107         | Hypothetical protein                                                                   | 99     | -     | -     |
| MCBIEB_1298 | PD_0974          | Hypothetical protein                                                                   | -      | -     | -     |
| MCBIEB_1299 | BC1002_6552      | Hypothetical protein                                                                   | -      | -     | -     |
| MCBIEB_1300 | L682_09905       | Hypothetical protein                                                                   | -      | -     | -     |
| MCBIEB_1301 | B398_05775       | Hypothetical protein                                                                   | 100    | 20    | -     |
| MCBIEB_1302 | L682_09915       | Hypothetical protein                                                                   | -      | -     | -     |
| MCBIEB_1303 | -                | Hypothetical protein                                                                   | -      | -     | -     |
| MCBIEB_1304 | BC1002_6556      | Hypothetical protein                                                                   | -      | -     | -     |
| MCBIEB_1305 | HMPREF0178_03708 | Hypothetical protein                                                                   | 100    | 22    | -     |
| MCBIEB_1306 | L682_09935       | Hypothetical protein                                                                   | -      | -     | -     |
| MCBIEB_1307 | HIB_15810        | Hypothetical protein                                                                   | -      | -     | -     |
| MCBIEB_1308 | L682_09945       | Hypothetical protein                                                                   | 100    | 26    | -     |
| MCBIEB_1309 | L682_09950       | Hypothetical protein                                                                   | -      | 28    | -     |
| MCBIEB_1310 | L682_09955       | Hypothetical protein                                                                   | 100    | -     | -     |
| MCBIEB_1311 | L682_09960       | Uncharacterized homolog of phage Mu protein gp47                                       | 100    | 26    | -     |
| MCBIEB_1312 | L682_09965       | Hypothetical protein                                                                   | -      | -     | -     |
| MCBIEB_1313 | SHV_21           | Hypothetical protein                                                                   | 100    | -     | -     |
| MCBIEB_1314 | -                | Hypothetical protein                                                                   | 99     | -     | -     |
| MCBIEB_1315 | CAGGBEG34_220024 | Hypothetical protein                                                                   | -      | 71    | -     |
| MCBIEB_1316 | CAGGBEG34_330054 | Permeases of the major facilitator superfamily                                         | 100    | 51    | 94-98 |
| MCBIEB_1317 | LYNGBM3L_10820   | Hypothetical protein                                                                   | -      | -     | -     |
| MCBIEB_1318 | -                | Predicted NTPase (NACHT family)                                                        | 66-91  | -     | -     |
| MCBIEB_1319 | MAE_58050        | Hypothetical protein                                                                   | 100    | -     | -     |
| MCBIEB_1320 | Tint_1965        | FOG: TPR repeat                                                                        | -      | -     | -     |
| MCBIEB_1321 | Tint_1966        | Uncharacterized protein conserved in bacteria                                          | -      | -     | -     |
| MCBIEB_1322 | int              | Uncharacterized protein conserved in bacteria                                          | -      | -     | -     |
| MCBIEB_1323 | Aasi_1766        | Integrase                                                                              | -      | -     | -     |
| MCBIEB_1324 | Npum_F1419       | DNA segregation ATPase FtsK/SpoIIIE and related proteins                               | -      | -     | -     |
| MCBIEB_1325 | L810_7852        | Predicted NTPase (NACHT family)                                                        | 99-100 | -     | -     |
| MCBIEB_1326 | M942_10535       | Transposase and inactivated derivatives                                                | -      | -     | -     |
| MCBIEB_1327 | RBRH_02548       | FOG: TPR repeat                                                                        | 98     | -     | -     |
| MCBIEB_1328 | EPM1_0524        | DNA uptake protein and related DNA-binding proteins                                    | -      | -     | -     |
| MCBIEB_1329 | relA             | Predicted permeases                                                                    | 100    | -     | -     |
| MCBIEB_1330 | etf              | Guanosine polyphosphate pyrophosphohydrolases/synthetases                              | 100    | 66    | 98    |
| MCBIEB_1331 | -                | Dehydrogenases (flavoproteins)                                                         | 100    | 77    | 98    |
| MCBIEB_1332 | -                | ABC-type cobalamin/Fe3+-siderophores transport systems, ATPase components              | 100    | 58    | 91    |
| MCBIEB_1333 | BURK_025795      | ABC-type Fe3+-siderophore transport system, permease component                         | 99     | 56    | 99    |
| MCBIEB_1334 | BYI23_A005940    | Outer membrane cobalamin receptor protein                                              | 100    | 46    | 94    |
| MCBIEB_1335 | -                | Hypothetical protein                                                                   | 100    | 46    | 93    |
| MCBIEB_1336 | lgt              | Hypothetical protein                                                                   | 100    | 69    | 90    |
| MCBIEB_1337 | livD             | Prolipoprotein diacylglyceryltransferase                                               | 100    | 33    | 96    |
| MCBIEB_1338 | hoIC             | Dihydroxyacid dehydratase/phosphogluconate dehydratase                                 | 100    | -     | -     |
| MCBIEB_1339 | pepA             | DNA polymerase III, chi subunit                                                        | 100    | 63    | 100   |
| MCBIEB_1340 | -                | Leucyl aminopeptidase                                                                  | 100    | 65    | 100   |
| MCBIEB_1341 | -                | Predicted permeases                                                                    | 100    | 72    | 97    |
| MCBIEB_1342 | BUPH_06468       | Predicted permeases                                                                    | 100    | 72    | 97    |
| MCBIEB_1343 | Bphyt_0969       | Uncharacterized conserved protein                                                      | 100    | -     | -     |
| MCBIEB_1344 | BUPH_04618       | Transcriptional regulator                                                              | 100    | 44-59 | 94    |
| MCBIEB_1345 | QWC_02034        | Uncharacterized conserved protein                                                      | 100    | -     | -     |
| MCBIEB_1346 | HMPREF1004_04590 | Flp pilus assembly protein, ATPase CpaF                                                | 100    | -     | -     |
| MCBIEB_1347 | BUPH_02420       | Transposase and inactivated derivatives                                                | 100    | -     | -     |
| MCBIEB_1348 | HMPREF1004_04592 | Type IV secretory pathway, VirB4 components                                            | 100    | -     | -     |
| MCBIEB_1349 | BC1001_1963      | Conjugal transfer/entry exclusion protein                                              | 100    | -     | -     |
| MCBIEB_1350 | HMPREF1004_04595 | Type IV secretory pathway, VirB6 components                                            | 100    | -     | -     |
| MCBIEB_1351 | BC1001_1966      | ABC-type polar amino acid transport system, ATPase component                           | 100    | -     | -     |
| MCBIEB_1352 | BUPH_02427       | Type IV secretory pathway, VirB9 components                                            | 100    | -     | -     |
| MCBIEB_1353 | HMPREF0004_2499  | Type IV secretory pathway, VirB10 components                                           | 100    | -     | -     |
| MCBIEB_1354 | OR214_02188      | Type IV secretory pathway, VirB9 components                                            | 100    | -     | -     |
| MCBIEB_1355 | EDWATA_03480     | Predicted Zn-dependent peptidases                                                      | 100    | -     | -     |
| MCBIEB_1356 | Rmet_6292        | FOG: PAS/PAC domain                                                                    | 100    | -     | -     |

|             |                   |                                                                                                     |        |       |     |
|-------------|-------------------|-----------------------------------------------------------------------------------------------------|--------|-------|-----|
| MCB1EB_1357 | OR214_02191       | Dinucleotide-utilizing enzymes involved in molybdopterin and thiamine biosynthesis family 1         | 100    | -     | -   |
| MCB1EB_1358 | OR214_02192       | Type II secretory pathway, ATPase PufE/Tip pilus assembly pathway, ATPase PilB                      | 100    | -     | -   |
| MCB1EB_1359 | L810_0422         | Type II secretory pathway, component PufF                                                           | 100    | -     | -   |
| MCB1EB_1360 | L810_0421         | Transcriptional regulators                                                                          | 100    | -     | -   |
| MCB1EB_1361 | BUPH_06486        | Phosphomannomutase                                                                                  | 83     | -     | -   |
| MCB1EB_1362 | RSPO_c02513       | Hypothetical protein                                                                                | 94     | -     | -   |
| MCB1EB_1363 | xcc-b100_3058     | Importin, protein involved in nuclear import                                                        | 100    | -     | -   |
| MCB1EB_1364 | RSPO_c02513       | Hypothetical protein                                                                                | 70     | -     | -   |
| MCB1EB_1365 | CAGGBEG34_500001  | Di- and tripeptidases                                                                               | 100    | -     | -   |
| MCB1EB_1366 | Bphy_5667         | SAM-dependent methyltransferases                                                                    | 100    | -     | -   |
| MCB1EB_1367 | QWC_13492         | Na <sup>+</sup> /citrate symporter                                                                  | -      | -     | -   |
| MCB1EB_1368 | Beep1808_1159     | Rad3-related DNA helicases                                                                          | 100    | -     | -   |
| MCB1EB_1369 | -                 | Predicted transcriptional regulators                                                                | 100    | -     | -   |
| MCB1EB_1370 | -                 | Zn-dependent hydrolases, including glyoxylases                                                      | 100    | 68    | 98  |
| MCB1EB_1371 | -                 | Transposase and inactivated derivatives                                                             | -      | -     | -   |
| MCB1EB_1372 | RoseRS_4025       | Transposase and inactivated derivatives                                                             | 100    | 56-58 | 90  |
| MCB1EB_1373 | -                 | Predicted NTPase (NACHT family)                                                                     | 66-91  | -     | -   |
| MCB1EB_1374 | O162_07910        | Predicted NTPase (NACHT family)                                                                     | -      | -     | -   |
| MCB1EB_1375 | ldcA              | Guanosine polyphosphate pyrophosphohydrolases/synthetases                                           | -      | -     | -   |
| MCB1EB_1376 | -                 | Uncharacterized proteins, homologs of microcin C7 resistance protein MccF                           | 100    | 62    | 98  |
| MCB1EB_1377 | -                 | Cytosine/adenosine deaminases                                                                       | 100    | 71    | 98  |
| MCB1EB_1378 | Nit79A3_0051      | Transposase and inactivated derivatives                                                             | -      | -     | -   |
| MCB1EB_1379 | -                 | Predicted oxidoreductases (related to aryl-alcohol dehydrogenases)                                  | -      | -     | -   |
| MCB1EB_1380 | -                 | Transposase and inactivated derivatives                                                             | 88     | -     | -   |
| MCB1EB_1381 | -                 | Transposase and inactivated derivatives                                                             | 100    | 65    | -   |
| MCB1EB_1382 | RoseRS_4025       | Transposase and inactivated derivatives                                                             | 93     | 49    | 86  |
| MCB1EB_1383 | Beep1808_1184     | Predicted NTPase (NACHT family)                                                                     | 66-91  | -     | -   |
| MCB1EB_1384 | ahpD              | Serine/threonine protein kinase                                                                     | -      | -     | -   |
| MCB1EB_1385 | ahpC1             | Uncharacterized conserved protein                                                                   | 100    | -     | -   |
| MCB1EB_1386 | -                 | Peroxioredoxin                                                                                      | 100    | 34    | 84  |
| MCB1EB_1387 | ompR              | Signal transduction histidine kinase                                                                | 92     | 73    | 90  |
| MCB1EB_1388 | truB              | Response regulators consisting of a CheY-like receiver domain and a winged-helix DNA-binding domain | 100    | 91    | 100 |
| MCB1EB_1389 | rbfA              | Pseudouridine synthase                                                                              | 100    | -     | -   |
| MCB1EB_1390 | infB              | Ribosome-binding factor A                                                                           | 100    | 76    | 100 |
| MCB1EB_1391 | nusA              | Translation initiation factor 2 (IF-2; GTPase)                                                      | 100    | -     | -   |
| MCB1EB_1392 | -                 | Transcription elongation factor                                                                     | 100    | 83    | 100 |
| MCB1EB_1393 | thiC              | Uncharacterized protein conserved in bacteria                                                       | 100    | -     | -   |
| MCB1EB_1394 | -                 | Thiamine biosynthesis protein ThiC                                                                  | 100    | 84    | 99  |
| MCB1EB_1395 | PPSC2_c3662       | Hypothetical protein                                                                                | 100    | 67    | 67  |
| MCB1EB_1396 | NH44784_027271    | Hypothetical protein                                                                                | 100    | -     | -   |
| MCB1EB_1397 | C266_24825        | Spermidine/putrescine-binding periplasmic protein                                                   | 100    | -     | -   |
| MCB1EB_1398 | BUPH_06600        | Transcriptional regulator                                                                           | 100    | 32    | 93  |
| MCB1EB_1399 | -                 | Anaerobic dehydrogenases, typically selenocysteine-containing                                       | 100    | 41    | 82  |
| MCB1EB_1400 | metC              | Phosphoserine phosphatase                                                                           | 100    | 63    | 100 |
| MCB1EB_1401 | rimO              | Cystathionine beta-lyases/cystathionine gamma-synthases                                             | 100    | 70    | 98  |
| MCB1EB_1402 | mr                | 2-methylthioadenine synthetase                                                                      | 100    | 79    | 97  |
| MCB1EB_1403 | rlmB              | Exoribonuclease R                                                                                   | 100    | 72    | 95  |
| MCB1EB_1404 | rpiA              | rRNA methylases                                                                                     | 100    | 75    | 98  |
| MCB1EB_1405 | -                 | Ribose 5-phosphate isomerase                                                                        | 100    | 63    | 97  |
| MCB1EB_1406 | -                 | DNA uptake lipoprotein                                                                              | 100    | 71    | 95  |
| MCB1EB_1407 | BgramDRAFT_2322   | Pseudouridylate synthases, 23S RNA-specific                                                         | 100    | 65    | 83  |
| MCB1EB_1408 | -                 | Uncharacterized conserved protein                                                                   | 100    | 54    | 96  |
| MCB1EB_1409 | SS1G_07990        | Uncharacterized protein conserved in bacteria                                                       | 100    | 67    | 91  |
| MCB1EB_1410 | -                 | Predicted NTPase (NACHT family)                                                                     | -      | -     | -   |
| MCB1EB_1411 | -                 | Hypothetical protein                                                                                | -      | -     | -   |
| MCB1EB_1412 | CAGGBEG34_420004  | Integrase                                                                                           | 100    | 27    | -   |
| MCB1EB_1413 | B738_22335        | Hypothetical protein                                                                                | 100    | -     | -   |
| MCB1EB_1414 | L485_22335        | Mismatch repair ATPase (MutS family)                                                                | 100    | -     | -   |
| MCB1EB_1415 | uvrC              | Hypothetical protein                                                                                | -      | -     | -   |
| MCB1EB_1416 | RBRH_00570        | Serine/threonine protein kinase                                                                     | -      | -     | -   |
| MCB1EB_1417 | BURCENK562V_C3062 | Na <sup>+</sup> /citrate symporter                                                                  | 92-100 | 51-54 | -   |
| MCB1EB_1418 | RBRH_04010        | Transcriptional regulator                                                                           | 100    | -     | -   |
| MCB1EB_1419 | RBRH_01048        | Hypothetical protein                                                                                | 100    | 47    | 98  |
| MCB1EB_1420 | QWA_03220         | Zn-dependent protease with chaperone function                                                       | 100    | 49    | 100 |
| MCB1EB_1421 | APP7_0464         | Methyl-accepting chemotaxis protein                                                                 | 89     | 56    | 84  |
| MCB1EB_1422 | PLO_0633          | Hypothetical protein                                                                                | -      | -     | -   |
| MCB1EB_1423 | CAGGBEG34_210001  | Excinuclease ATPase subunit                                                                         | -      | -     | -   |
| MCB1EB_1424 | Acix9_3324        | Hypothetical protein                                                                                | -      | -     | -   |
| MCB1EB_1425 | CAGGBEG34_350021  | Phage anti-repressor protein                                                                        | 100    | -     | -   |
| MCB1EB_1426 | AcdelDRAFT_0859   | Predicted transcriptional regulator                                                                 | -      | -     | -   |
| MCB1EB_1427 | MYCHL_23848       | Uncharacterized protein conserved in bacteria, prophage-related                                     | -      | 44    | -   |
| MCB1EB_1428 | V757_00985        | Uncharacterized conserved protein                                                                   | -      | -     | -   |
| MCB1EB_1429 | CAGGBEG34_330012  | Bacterial cell division membrane protein                                                            | -      | -     | -   |
| MCB1EB_1430 | CAGGBEG34_330013  | Hypothetical protein                                                                                | 100    | -     | -   |
| MCB1EB_1431 | BDB_30040         | Acyl-CoA dehydrogenases                                                                             | 100    | -     | -   |
| MCB1EB_1432 | CAGGBEG34_330022  | Holliday junction resolvase                                                                         | -      | -     | -   |
| MCB1EB_1433 | CAGGBEG34_120004  | Pyruvate-formate lyase-activating enzyme                                                            | 100    | -     | -   |
| MCB1EB_1434 | -                 | Uncharacterized protein conserved in bacteria                                                       | -      | -     | -   |
| MCB1EB_1435 | -                 | Predicted transcriptional regulator                                                                 | -      | 42-45 | -   |
| MCB1EB_1436 | PA2G_00805        | Uncharacterized protein conserved in bacteria                                                       | -      | 60    | -   |
| MCB1EB_1437 | -                 | Acetyl-CoA carboxylase, carboxyltransferase component (subunits alpha and beta)                     | -      | -     | -   |
| MCB1EB_1438 | -                 | Uncharacterized protein conserved in bacteria                                                       | 95-100 | 32    | -   |
| MCB1EB_1439 | BC1002_6544       | Uncharacterized protein conserved in bacteria                                                       | 100    | -     | -   |
| MCB1EB_1440 | BC1002_6545       | Uncharacterized protein, homolog of phage Mu protein gp30                                           | 100    | 30    | -   |
| MCB1EB_1441 | XF_1576           | Uncharacterized protein conserved in bacteria                                                       | 100    | -     | -   |
| MCB1EB_1442 | BC1002_6547       | Hypothetical protein                                                                                | -      | -     | -   |
| MCB1EB_1443 | BC1002_6549       | Uncharacterized protein conserved in bacteria                                                       | 99     | -     | -   |
| MCB1EB_1444 | gene0107          | Hypothetical protein                                                                                | 99-100 | -     | -   |
| MCB1EB_1445 | PD_0974           | Hypothetical protein                                                                                | -      | -     | -   |
| MCB1EB_1446 | BC1002_6552       | Hypothetical protein                                                                                | -      | -     | -   |
| MCB1EB_1447 | L682_09905        | Hypothetical protein                                                                                | 100    | -     | -   |
| MCB1EB_1448 | B398_05775        | Hypothetical protein                                                                                | 100    | 20    | -   |
| MCB1EB_1449 | P910_003116       | Hypothetical protein                                                                                | 100    | -     | -   |
| MCB1EB_1450 | -                 | Hypothetical protein                                                                                | -      | -     | -   |
| MCB1EB_1451 | BC1002_6556       | Hypothetical protein                                                                                | -      | -     | -   |
| MCB1EB_1452 | -                 | Hypothetical protein                                                                                | 100    | 22    | -   |
| MCB1EB_1453 | L682_09935        | Hypothetical protein                                                                                | 96     | -     | -   |
| MCB1EB_1454 | HIB_15810         | Hypothetical protein                                                                                | -      | -     | -   |
| MCB1EB_1455 | L682_09945        | Hypothetical protein                                                                                | 100    | 25    | 77  |
| MCB1EB_1456 | L682_09950        | Hypothetical protein                                                                                | 100    | 32    | -   |



|             |                   |                                                                        |        |       |     |
|-------------|-------------------|------------------------------------------------------------------------|--------|-------|-----|
| MCB1EB_1457 | L682_09955        | Hypothetical protein                                                   | -      | -     | -   |
| MCB1EB_1458 | L682_09960        | Uncharacterized homolog of phage Mu protein gp47                       | 100    | 26    | -   |
| MCB1EB_1459 | L682_09965        | Hypothetical protein                                                   | -      | -     | -   |
| MCB1EB_1460 | SFV_0255          | Hypothetical protein                                                   | 100    | -     | -   |
| MCB1EB_1461 | -                 | Hypothetical protein                                                   | 99     | -     | -   |
| MCB1EB_1462 | CAGGBEG34_220024  | Hypothetical protein                                                   | 100    | 72    | 99  |
| MCB1EB_1463 | CAGGBEG34_330054  | Permeases of the major facilitator superfamily                         | -      | 53    | -   |
| MCB1EB_1464 | Halhy_2265        | Hypothetical protein                                                   | -      | -     | -   |
| MCB1EB_1465 | BGP_4141          | Predicted NTPase (NACHT family)                                        | 70-100 | -     | -   |
| MCB1EB_1466 | -                 | Predicted NTPase (NACHT family)                                        | 99-100 | -     | -   |
| MCB1EB_1467 | CAGGBEG34_420004  | Integrase                                                              | 100    | 29    | -   |
| MCB1EB_1468 | B738_22335        | Hypothetical protein                                                   | 100    | -     | -   |
| MCB1EB_1469 | L485_22335        | Mismatch repair ATPase (MutS family)                                   | 100    | -     | -   |
| MCB1EB_1470 | -                 | Hypothetical protein                                                   | -      | -     | -   |
| MCB1EB_1471 | RBRH_00570        | Serine/threonine protein kinase                                        | -      | -     | -   |
| MCB1EB_1472 | tnpA2             | Na <sup>+</sup> /citrate symporter                                     | -      | -     | -   |
| MCB1EB_1473 | RBRH_00570        | Hypothetical protein                                                   | -      | 64    | -   |
| MCB1EB_1474 | CAGGBEG34_610004  | Na <sup>+</sup> /citrate symporter                                     | -      | -     | -   |
| MCB1EB_1475 | BURCENK562V_C3071 | Transglutaminase-like enzymes, putative cysteine proteases             | 100    | 44    | 100 |
| MCB1EB_1476 | BURCENK562V_C3072 | Hypothetical protein                                                   | 100    | -     | -   |
| MCB1EB_1477 | -                 | Signal transduction histidine kinase                                   | -      | -     | -   |
| MCB1EB_1478 | -                 | Hypothetical protein                                                   | -      | -     | -   |
| MCB1EB_1479 | SDRG_14715        | Hypothetical protein                                                   | 100    | -     | -   |
| MCB1EB_1480 | Veis_0670         | Excinuclease ATPase subunit                                            | -      | -     | -   |
| MCB1EB_1481 | Acix9_3324        | Hypothetical protein                                                   | -      | -     | -   |
| MCB1EB_1482 | mEp043_050        | Phage anti-repressor protein                                           | 100    | -     | -   |
| MCB1EB_1483 | G838_04777        | Predicted transcriptional regulator                                    | -      | -     | -   |
| MCB1EB_1484 | -                 | Uncharacterized protein conserved in bacteria, prophage-related        | -      | -     | -   |
| MCB1EB_1485 | V757_00985        | Predicted dehydrogenase                                                | 100    | -     | -   |
| MCB1EB_1486 | CAGGBEG34_330012  | Bacterial cell division membrane protein                               | -      | -     | -   |
| MCB1EB_1487 | CAGGBEG34_330013  | Hypothetical protein                                                   | 100    | -     | -   |
| MCB1EB_1488 | BDB_30040         | Acyl-CoA dehydrogenases                                                | -      | -     | -   |
| MCB1EB_1489 | CAGGBEG34_330022  | Holliday junction resolvase                                            | -      | -     | -   |
| MCB1EB_1490 | HMPREF0005_02877  | Pyruvate-formate lyase-activating enzyme                               | 100    | -     | -   |
| MCB1EB_1491 | N234_18785        | Hypothetical protein                                                   | 97     | -     | -   |
| MCB1EB_1492 | -                 | Hypothetical protein                                                   | -      | -     | -   |
| MCB1EB_1493 | -                 | Uncharacterized protein conserved in bacteria                          | 95-100 | 31    | -   |
| MCB1EB_1494 | XFEF_01759        | Uncharacterized protein conserved in bacteria                          | 100    | -     | -   |
| MCB1EB_1495 | BC1002_6545       | Uncharacterized protein, homolog of phage Mu protein gp30              | 100    | 30    | -   |
| MCB1EB_1496 | XF_1576           | Uncharacterized protein conserved in bacteria                          | 100    | -     | -   |
| MCB1EB_1497 | BC1002_6547       | Hypothetical protein                                                   | -      | -     | -   |
| MCB1EB_1498 | BC1002_6549       | Uncharacterized protein conserved in bacteria                          | 99     | -     | -   |
| MCB1EB_1499 | BC1002_6550       | Hypothetical protein                                                   | 99-100 | -     | -   |
| MCB1EB_1500 | B398_05790        | Hypothetical protein                                                   | 100    | -     | -   |
| MCB1EB_1501 | BC1002_6552       | Hypothetical protein                                                   | 100    | -     | -   |
| MCB1EB_1502 | L682_09905        | Hypothetical protein                                                   | 100    | -     | -   |
| MCB1EB_1503 | B398_05775        | Hypothetical protein                                                   | 100    | 21    | -   |
| MCB1EB_1504 | B375_09910        | Hypothetical protein                                                   | -      | -     | -   |
| MCB1EB_1505 | -                 | Hypothetical protein                                                   | -      | -     | -   |
| MCB1EB_1506 | BC1002_6556       | Hypothetical protein                                                   | -      | -     | -   |
| MCB1EB_1507 | HMPREF9095_1683   | Hypothetical protein                                                   | 100    | 23    | -   |
| MCB1EB_1508 | L682_09935        | Hypothetical protein                                                   | -      | -     | -   |
| MCB1EB_1509 | HMPREF9095_1680   | Hypothetical protein                                                   | 100    | -     | -   |
| MCB1EB_1510 | L682_09945        | Hypothetical protein                                                   | 100    | 25    | 77  |
| MCB1EB_1511 | L682_09950        | Hypothetical protein                                                   | -      | 27    | -   |
| MCB1EB_1512 | L682_09955        | Hypothetical protein                                                   | -      | -     | -   |
| MCB1EB_1513 | L682_09960        | Uncharacterized homolog of phage Mu protein gp47                       | 100    | 27    | -   |
| MCB1EB_1514 | L682_09965        | Hypothetical protein                                                   | 100    | -     | -   |
| MCB1EB_1515 | SFV_0255          | Hypothetical protein                                                   | 100    | -     | -   |
| MCB1EB_1516 | -                 | Hypothetical protein                                                   | -      | -     | -   |
| MCB1EB_1517 | CAGGBEG34_220024  | Hypothetical protein                                                   | 100    | 71    | -   |
| MCB1EB_1518 | CAGGBEG34_330054  | Permeases of the major facilitator superfamily                         | 100    | 53    | 94  |
| MCB1EB_1519 | RoseRS_4025       | Hypothetical protein                                                   | 100    | -     | -   |
| MCB1EB_1520 | Calmi_0847        | Predicted NTPase (NACHT family)                                        | 66-91  | -     | -   |
| MCB1EB_1521 | ANA_C12029        | Predicted NTPase (NACHT family)                                        | 66-91  | -     | -   |
| MCB1EB_1522 | NECAME_13904      | Predicted NTPase (NACHT family)                                        | 66-91  | -     | -   |
| MCB1EB_1523 | -                 | Predicted GTPases                                                      | -      | -     | -   |
| MCB1EB_1524 | CAGGBEG34_420004  | Integrase                                                              | 100    | 28    | -   |
| MCB1EB_1525 | B738_22335        | Hypothetical protein                                                   | 100    | -     | -   |
| MCB1EB_1526 | L485_22335        | Hypothetical protein                                                   | 100    | -     | -   |
| MCB1EB_1527 | -                 | Hypothetical protein                                                   | -      | -     | -   |
| MCB1EB_1528 | RBRH_00570        | Serine/threonine protein kinase                                        | -      | -     | -   |
| MCB1EB_1529 | CAGGBEG34_610004  | Na <sup>+</sup> /citrate symporter                                     | 99-100 | 49-52 | -   |
| MCB1EB_1530 | BDB_30064         | Acetate kinase                                                         | -      | 41    | -   |
| MCB1EB_1531 | Reut_A2376        | ATPase involved in DNA repair                                          | -      | -     | -   |
| MCB1EB_1532 | BDB_30060         | Hypothetical protein                                                   | -      | -     | -   |
| MCB1EB_1533 | SCHCODRAFT_110303 | Hypothetical protein                                                   | -      | -     | -   |
| MCB1EB_1534 | CAGGBEG34_910002  | Transcription termination factor                                       | -      | -     | -   |
| MCB1EB_1535 | Acix9_3324        | Hypothetical protein                                                   | -      | -     | -   |
| MCB1EB_1536 | G419_09581        | Phage anti-repressor protein                                           | 100    | -     | -   |
| MCB1EB_1537 | HMPREF9530_00525  | ABC-type multidrug transport system, ATPase and permease components    | -      | -     | -   |
| MCB1EB_1538 | BAnh1_02300       | SOS-response transcriptional repressors (RecA-mediated autopeptidases) | -      | -     | -   |
| MCB1EB_1539 | C817_04332        | Uncharacterized protein conserved in bacteria, prophage-related        | -      | -     | -   |
| MCB1EB_1540 | V757_00985        | Cell division protein FtsI/penicillin-binding protein 2                | -      | -     | -   |
| MCB1EB_1541 | CAGGBEG34_330012  | Cdc6-related protein, AAA superfamily ATPase                           | -      | -     | -   |
| MCB1EB_1542 | CAGGBEG34_330013  | Hypothetical protein                                                   | 98     | -     | -   |
| MCB1EB_1543 | BDB_30040         | Protein involved in catabolism of external DNA                         | -      | -     | -   |
| MCB1EB_1544 | CAGGBEG34_330022  | Holliday junction resolvase                                            | 98     | -     | -   |
| MCB1EB_1545 | KYC_12668         | Pyruvate-formate lyase-activating enzyme                               | -      | -     | -   |
| MCB1EB_1546 | PA2G_00805        | Hypothetical protein                                                   | 99     | -     | -   |
| MCB1EB_1547 | -                 | Zn-dependent protease with chaperone function                          | -      | -     | -   |
| MCB1EB_1548 | -                 | Uncharacterized protein conserved in bacteria                          | 90-100 | 32    | -   |
| MCB1EB_1549 | -                 | Predicted nucleic acid-binding protein, contains PIN domain            | 100    | 45    | -   |
| MCB1EB_1550 | BC1002_6543       | Virulence-associated protein and related proteins                      | 100    | -     | -   |
| MCB1EB_1551 | BC1002_6544       | Uncharacterized protein conserved in bacteria                          | 99-100 | -     | -   |
| MCB1EB_1552 | BC1002_6545       | Uncharacterized protein, homolog of phage Mu protein gp30              | 100    | 29    | -   |
| MCB1EB_1553 | XF_1576           | Uncharacterized protein conserved in bacteria                          | 99-100 | -     | -   |
| MCB1EB_1554 | BC1002_6547       | Hypothetical protein                                                   | -      | -     | -   |
| MCB1EB_1555 | BC1002_6549       | Uncharacterized protein conserved in bacteria                          | 99     | -     | -   |
| MCB1EB_1556 | gene0107          | Hypothetical protein                                                   | 99-100 | -     | -   |
| MCB1EB_1557 | PD_0974           | Hypothetical protein                                                   | -      | -     | -   |
| MCB1EB_1558 | BC1002_6552       | Hypothetical protein                                                   | 100    | -     | -   |
| MCB1EB_1559 | L682_09905        | Hypothetical protein                                                   | -      | -     | -   |
| MCB1EB_1560 | B398_05775        | Hypothetical protein                                                   | 100    | 21    | -   |
| MCB1EB_1561 | B375_09910        | Hypothetical protein                                                   | -      | -     | -   |

|             |                  |                                                                                        |        |       |     |
|-------------|------------------|----------------------------------------------------------------------------------------|--------|-------|-----|
| MCB1EB_1562 | -                | Hypothetical protein                                                                   | 100    | -     | -   |
| MCB1EB_1563 | BC1002_6556      | Hypothetical protein                                                                   | -      | -     | -   |
| MCB1EB_1564 | HIBPF_09270      | Hypothetical protein                                                                   | 100    | 22    | -   |
| MCB1EB_1565 | L682_09935       | Hypothetical protein                                                                   | -      | -     | -   |
| MCB1EB_1566 | HMPREF9095_1680  | Hypothetical protein                                                                   | -      | -     | -   |
| MCB1EB_1567 | L682_09945       | Hypothetical protein                                                                   | 100    | 25    | -   |
| MCB1EB_1568 | L682_09950       | Hypothetical protein                                                                   | -      | 28    | -   |
| MCB1EB_1569 | L682_09955       | Hypothetical protein                                                                   | 100    | -     | -   |
| MCB1EB_1570 | L682_09960       | Uncharacterized homolog of phage Mu protein gp47                                       | 100    | 26    | -   |
| MCB1EB_1571 | L682_09965       | Hypothetical protein                                                                   | -      | -     | -   |
| MCB1EB_1572 | SVF_0255         | Hypothetical protein                                                                   | 100    | -     | -   |
| MCB1EB_1573 | -                | Hypothetical protein                                                                   | 99     | -     | -   |
| MCB1EB_1574 | BC1002_6570      | Hypothetical protein                                                                   | 100    | 66    | 99  |
| MCB1EB_1575 | CAGGBEG34_330054 | Phosphotransferase system IIC components, glucose/maltose/N-acetylglucosamine-specific | 70-100 | 53    | -   |
| MCB1EB_1576 | Halhy_2265       | Hypothetical protein                                                                   | 100    | -     | -   |
| MCB1EB_1577 | Halhy_2265       | Predicted NTPase (NACHT family)                                                        | -      | -     | -   |
| MCB1EB_1578 | -                | Predicted NTPase (NACHT family)                                                        | 99-100 | -     | -   |
| MCB1EB_1579 | CAGGBEG34_420004 | Integrase                                                                              | 100    | 26    | -   |
| MCB1EB_1580 | B738_22335       | Hypothetical protein                                                                   | 99-100 | -     | -   |
| MCB1EB_1581 | uvrC             | Hypothetical protein                                                                   | 75-100 | -     | -   |
| MCB1EB_1582 | RBRH_00570       | Predicted exonuclease of the beta-lactamase fold involved in RNA processing            | -      | -     | -   |
| MCB1EB_1583 | CAGGBEG34_610004 | Na <sup>+</sup> /citrate symporter                                                     | 99-100 | 49-53 | -   |
| MCB1EB_1584 | BDB_30064        | Acetate kinase                                                                         | -      | 42    | -   |
| MCB1EB_1585 | -                | Hypothetical protein                                                                   | -      | -     | -   |
| MCB1EB_1586 | -                | Transposase and inactivated derivatives                                                | 100    | 27-34 | -   |
| MCB1EB_1587 | CAGGBEG34_330054 | Transposase and inactivated derivatives                                                | 91-100 | -     | -   |
| MCB1EB_1588 | RoseRS_4025      | Transposase and inactivated derivatives                                                | 95     | -     | -   |
| MCB1EB_1589 | -                | Predicted NTPase (NACHT family)                                                        | 78-96  | -     | -   |
| MCB1EB_1590 | -                | Transposase and inactivated derivatives                                                | -      | -     | -   |
| MCB1EB_1591 | J07HX64_02175    | Transposase and inactivated derivatives                                                | 74-94  | -     | -   |
| MCB1EB_1592 | -                | ATPase components of ABC transporters with duplicated ATPase domains                   | 100    | -     | -   |
| MCB1EB_1593 | -                | Transposase and inactivated derivatives                                                | 100    | 65    | -   |
| MCB1EB_1594 | -                | Transposase and inactivated derivatives                                                | -      | -     | -   |
| MCB1EB_1595 | CAGGBEG34_330054 | InterPro IPR001584 COGs COG2801                                                        | -      | -     | -   |
| MCB1EB_1596 | PODANS_4_1190    | Purine-cytosine permease and related proteins                                          | -      | -     | -   |
| MCB1EB_1597 | Npun_F1419       | Predicted NTPase (NACHT family)                                                        | 66-91  | -     | -   |
| MCB1EB_1598 | -                | Predicted NTPase (NACHT family)                                                        | 55-58  | -     | -   |
| MCB1EB_1599 | Halhy_2265       | Transposase and inactivated derivatives                                                | 100    | -     | -   |
| MCB1EB_1600 | -                | Predicted NTPase (NACHT family)                                                        | 66-91  | -     | -   |
| MCB1EB_1601 | SSFG_07278       | Hypothetical protein                                                                   | -      | -     | -   |
| MCB1EB_1602 | HMPREF0476_1272  | Ferritin-like protein                                                                  | 100    | -     | -   |
| MCB1EB_1603 | -                | Hypothetical protein                                                                   | 100    | -     | -   |
| MCB1EB_1604 | CSV86_11535      | Predicted transcriptional regulator                                                    | -      | -     | -   |
| MCB1EB_1605 | -                | Pyrraline-5-carboxylate reductase                                                      | -      | -     | -   |
| MCB1EB_1606 | -                | Uncharacterized protein conserved in bacteria                                          | -      | -     | -   |
| MCB1EB_1607 | Cri9333_3089     | Hypothetical protein                                                                   | -      | -     | -   |
| MCB1EB_1608 | HNWD1            | Predicted NTPase (NACHT family)                                                        | -      | -     | -   |
| MCB1EB_1609 | CAGGBEG34_420005 | Predicted NTPase (NACHT family)                                                        | 99-100 | -     | -   |
| MCB1EB_1610 | CAGGBEG34_420004 | Integrase                                                                              | -      | -     | -   |
| MCB1EB_1611 | RoseRS_4025      | Hypothetical protein                                                                   | -      | -     | -   |
| MCB1EB_1612 | RoseRS_4025      | Predicted NTPase (NACHT family)                                                        | 66-91  | -     | -   |
| MCB1EB_1613 | LYNGBM3L_24300   | Predicted NTPase (NACHT family)                                                        | 70-100 | -     | -   |
| MCB1EB_1614 | CAGGBEG34_330054 | Predicted NTPase (NACHT family)                                                        | 66-91  | -     | -   |
| MCB1EB_1615 | RSK60_1520039    | Hypothetical protein                                                                   | 99     | -     | -   |
| MCB1EB_1616 | -                | Hypothetical protein                                                                   | 100    | -     | -   |
| MCB1EB_1617 | -                | Transposase and inactivated derivatives                                                | 100    | -     | -   |
| MCB1EB_1618 | -                | Transposase and inactivated derivatives                                                | 100    | 62    | 99  |
| MCB1EB_1619 | CAGGBEG34_330054 | Transposase and inactivated derivatives                                                | -      | -     | -   |
| MCB1EB_1620 | Halhy_2265       | Hypothetical protein                                                                   | -      | -     | -   |
| MCB1EB_1621 | -                | Predicted NTPase (NACHT family)                                                        | -      | -     | -   |
| MCB1EB_1622 | -                | Transposase and inactivated derivatives                                                | 100    | -     | -   |
| MCB1EB_1623 | -                | Transposase and inactivated derivatives                                                | 100    | 27-34 | -   |
| MCB1EB_1624 | -                | Transposase and inactivated derivatives                                                | 91     | -     | -   |
| MCB1EB_1625 | CAGGBEG34_330054 | Predicted NTPase (NACHT family)                                                        | -      | -     | -   |
| MCB1EB_1626 | -                | Hypothetical protein                                                                   | -      | -     | -   |
| MCB1EB_1627 | Bcep1808_1184    | Hypothetical protein                                                                   | 100    | -     | -   |
| MCB1EB_1628 | Closa_1473       | Anaerobic dehydrogenases, typically selenocysteine-containing                          | 99-100 | -     | -   |
| MCB1EB_1629 | HEAR2269         | NTP pyrophosphohydrolases including oxidative damage repair enzymes                    | 93-94  | -     | -   |
| MCB1EB_1630 | HEAR2270         | Polyketide synthase modules and related proteins                                       | 100    | -     | -   |
| MCB1EB_1631 | HEAR2272         | Hemolysin activation/secretion protein                                                 | 100    | -     | -   |
| MCB1EB_1632 | HEAR2274         | ABC-type multidrug transport system, ATPase and permease components                    | 100    | -     | -   |
| MCB1EB_1633 | LPO_2922         | 16S rRNA uridine-516 pseudouridylylase and related pseudouridylylase synthases         | 99     | -     | -   |
| MCB1EB_1634 | JBD24_022        | Hypothetical protein                                                                   | 100    | -     | -   |
| MCB1EB_1635 | XCR1_4160004     | Formate/nitrite family of transporters                                                 | 100    | -     | -   |
| MCB1EB_1636 | HEAR2279         | Hypothetical protein                                                                   | 100    | -     | -   |
| MCB1EB_1637 | Pnuc_1121        | Xanthine/uracil permeases                                                              | 100    | -     | -   |
| MCB1EB_1638 | -                | Hypothetical protein                                                                   | 100    | -     | -   |
| MCB1EB_1639 | -                | Predicted nucleic acid-binding protein, contains PIN domain                            | 100    | 83    | -   |
| MCB1EB_1640 | HEAR2281         | Hypothetical protein                                                                   | 100    | 75-76 | 100 |
| MCB1EB_1641 | Pnuc_1125        | K <sup>+</sup> transport systems, NAD-binding component                                | 100    | -     | -   |
| MCB1EB_1642 | -                | Dissimilatory sulfite reductase (desulfoviridin), alpha and beta subunits              | 100    | -     | -   |
| MCB1EB_1643 | PMI42_04850      | 8.1 : Prophage genes and phage related functions                                       | 100    | -     | -   |
| MCB1EB_1644 | DaAHT2_1258      | Hypothetical protein                                                                   | 100    | -     | -   |
| MCB1EB_1645 | bbp31            | Predicted ATPase                                                                       | 100    | -     | -   |
| MCB1EB_1646 | G701_02790       | Predicted transcriptional regulators                                                   | 100    | -     | -   |
| MCB1EB_1647 | Xfasm12_1180     | Predicted transcriptional regulator                                                    | 100    | -     | -   |
| MCB1EB_1648 | bbp38            | NADH-flavin oxidoreductases, Old Yellow Enzyme family                                  | 100    | -     | -   |
| MCB1EB_1649 | bbp40            | Hypothetical protein                                                                   | 100    | -     | -   |
| MCB1EB_1650 | -                | Hypothetical protein                                                                   | 100    | -     | -   |
| MCB1EB_1651 | -                | Uncharacterized phage-encoded protein                                                  | 100    | -     | -   |
| MCB1EB_1652 | -                | Hypothetical protein                                                                   | 100    | -     | -   |
| MCB1EB_1653 | -                | Hypothetical protein                                                                   | 100    | -     | -   |
| MCB1EB_1654 | RBRH_01258       | Superfamily II DNA/RNA helicases, SNF2 family                                          | 97     | -     | -   |
| MCB1EB_1655 | RBRH_00570       | Na <sup>+</sup> /citrate symporter                                                     | -      | -     | -   |
| MCB1EB_1656 | C266_17531       | Na <sup>+</sup> /citrate symporter                                                     | -      | -     | -   |
| MCB1EB_1657 | C266_17536       | Hypothetical protein                                                                   | 100    | -     | -   |
| MCB1EB_1658 | -                | Integrase                                                                              | 82     | -     | -   |
| MCB1EB_1659 | -                | Putative hemolysin                                                                     | 100    | 68    | 87  |
| MCB1EB_1660 | ftsB             | Membrane carboxypeptidase/penicillin-binding protein                                   | 100    | 64    | -   |
| MCB1EB_1661 | eno              | Septum formation initiator                                                             | 76     | -     | -   |
| MCB1EB_1662 | kdsA             | Enolase                                                                                | 100    | 88    | 100 |
| MCB1EB_1663 | pyrG             | 3-deoxy-D-manno-octulosonic acid (KDO) 8-phosphate synthase                            | 100    | 82    | 100 |



|             |                   |                                                                                                                          |        |       |       |
|-------------|-------------------|--------------------------------------------------------------------------------------------------------------------------|--------|-------|-------|
| MCB1EB_1664 | ComA              | CTP synthase (UTP-ammonia lyase)                                                                                         | 100    | 84    | 98    |
| MCB1EB_1665 | SG1089            | Predicted membrane metal-binding protein                                                                                 | 93     | 44    | 100   |
| MCB1EB_1666 | lolD              | Hypothetical protein                                                                                                     | 100    | -     | -     |
| MCB1EB_1667 | -                 | ABC-type antimicrobial peptide transport system, ATPase component                                                        | 100    | 68    | 95    |
| MCB1EB_1668 | BY123_A017700     | ABC-type transport system, involved in lipoprotein release, permease component                                           | 100    | 74    | 100   |
| MCB1EB_1669 | recJ              | Uncharacterized protein conserved in bacteria                                                                            | 100    | 51    | 96    |
| MCB1EB_1670 | prfB              | Single-stranded DNA-specific exonuclease                                                                                 | 100    | 76    | 100   |
| MCB1EB_1671 | lysS              | Protein chain release factor B                                                                                           | 100    | 83    | 92    |
| MCB1EB_1672 | Dsui_2362         | Lysyl-tRNA synthetase (class II)                                                                                         | 100    | 77    | 98    |
| MCB1EB_1673 | -                 | Outer membrane lipoprotein                                                                                               | 100    | 45    | 92    |
| MCB1EB_1674 | AXXA_21803        | Exonuclease III                                                                                                          | 100    | 70    | 99    |
| MCB1EB_1675 | dppA              | Transcriptional regulator                                                                                                | 100    | 38    | 100   |
| MCB1EB_1676 | -                 | ABC-type dipeptide transport system, periplasmic component                                                               | 100    | -     | -     |
| MCB1EB_1677 | -                 | Hypothetical protein                                                                                                     | 100    | -     | -     |
| MCB1EB_1678 | AAI_13445         | Predicted signal-transduction protein containing cAMP-binding and CBS domains                                            | 100    | -     | -     |
| MCB1EB_1679 | -                 | DNA polymerase III, epsilon subunit and related 3'-5' exonucleases                                                       | 100    | -     | -     |
| MCB1EB_1680 | -                 | Choline-glycine betaine transporter                                                                                      | 100    | -     | -     |
| MCB1EB_1681 | -                 | Transposase and inactivated derivatives                                                                                  | 99     | -     | -     |
| MCB1EB_1682 | BC1001_3356       | Transposase and inactivated derivatives                                                                                  | 95     | 30-32 | 77-78 |
| MCB1EB_1683 | KYC_09711         | ABC-type dipeptide transport system, periplasmic component                                                               | 100    | 53    | 98    |
| MCB1EB_1684 | serS              | Transcriptional regulator                                                                                                | 100    | 36    | 96    |
| MCB1EB_1685 | -                 | Seryl-tRNA synthetase                                                                                                    | 100    | 64    | 99    |
| MCB1EB_1686 | -                 | ATPase related to the helicase subunit of the Holliday junction resolvase                                                | 100    | 73    | 97    |
| MCB1EB_1687 | ftsK              | Outer membrane lipoprotein-sorting protein                                                                               | 100    | 53    | 91    |
| MCB1EB_1688 | trxB2             | DNA segregation ATPase FtsK/SpoIIIE and related proteins                                                                 | 100    | 76    | 100   |
| MCB1EB_1689 | N9414_23838       | Thioredoxin reductase                                                                                                    | 100    | 82    | 99    |
| MCB1EB_1690 | COXBURSA334_0199  | Hypothetical protein                                                                                                     | 100    | -     | -     |
| MCB1EB_1691 | nadE              | Hypothetical protein                                                                                                     | 100    | -     | -     |
| MCB1EB_1692 | secG              | NAD synthase                                                                                                             | 100    | 72    | 100   |
| MCB1EB_1693 | tpiA              | Preprotein translocase subunit SecG                                                                                      | 100    | 60    | 100   |
| MCB1EB_1694 | Rleg4DRAFT_3636   | Triosephosphate isomerase                                                                                                | 100    | 30    | 95    |
| MCB1EB_1695 | -                 | Superfamily I DNA and RNA helicases and helicase subunits                                                                | 100    | 59    | 75    |
| MCB1EB_1696 | pnp               | NADPH:quinone reductase and related Zn-dependent oxidoreductases                                                         | 100    | 71    | 100   |
| MCB1EB_1697 | rpsO              | Polyribonucleotide nucleotidyltransferase (polynucleotide phosphorylase)                                                 | 100    | 81    | 97    |
| MCB1EB_1698 | -                 | Ribosomal protein S15P/S13E                                                                                              | 100    | 76    | 100   |
| MCB1EB_1699 | bglu_1g25640      | Hypothetical protein                                                                                                     | 88     | 64    | 87    |
| MCB1EB_1700 | Lepto7376_1210    | Hypothetical protein                                                                                                     | 98     | -     | 84    |
| MCB1EB_1701 | -                 | Predicted NTPase (NACHT family)                                                                                          | 100    | -     | -     |
| MCB1EB_1702 | YN1551_2013       | Uncharacterized protein conserved in bacteria                                                                            | 100    | 63    | 100   |
| MCB1EB_1703 | -                 | FOG: Ankyrin repeat                                                                                                      | 92     | -     | -     |
| MCB1EB_1704 | nuoN              | Hypothetical protein                                                                                                     | 100    | 59    | 100   |
| MCB1EB_1705 | nuoM              | NADH:ubiquinone oxidoreductase subunit 2 (chain N)                                                                       | 100    | 72    | 100   |
| MCB1EB_1706 | nuoL              | NADH:ubiquinone oxidoreductase subunit 4 (chain M)                                                                       | 100    | 77    | 99    |
| MCB1EB_1707 | nuoK              | NADH:ubiquinone oxidoreductase subunit 5 (chain L)/Multisubunit Na <sup>+</sup> /H <sup>+</sup> antiporter, MnhA subunit | 100    | 72    | 100   |
| MCB1EB_1708 | nuoJ              | NADH:ubiquinone oxidoreductase subunit 11 or 4L (chain K)                                                                | 100    | 91    | 98    |
| MCB1EB_1709 | nuoI              | NADH:ubiquinone oxidoreductase subunit 6 (chain J)                                                                       | 100    | 61    | 100   |
| MCB1EB_1710 | nuoH              | Formate hydrogenlyase subunit 6/NADH:ubiquinone oxidoreductase 23 kD subunit (chain I)                                   | 100    | 90    | 99    |
| MCB1EB_1711 | nuoG              | NADH:ubiquinone oxidoreductase subunit 1 (chain H)                                                                       | 100    | 82    | 100   |
| MCB1EB_1712 | nuoF              | NADH dehydrogenase/NADH:ubiquinone oxidoreductase 75 kD subunit (chain G)                                                | 100    | 70    | 100   |
| MCB1EB_1713 | nuoE              | NADH:ubiquinone oxidoreductase, NADH-binding (51 kD) subunit                                                             | 100    | 87    | 98    |
| MCB1EB_1714 | nuoD              | NADH:ubiquinone oxidoreductase 24 kD subunit                                                                             | 100    | 79    | 100   |
| MCB1EB_1715 | nuoC              | NADH:ubiquinone oxidoreductase 49 kD subunit 7                                                                           | 100    | 88    | 100   |
| MCB1EB_1716 | nuoB              | NADH:ubiquinone oxidoreductase 27 kD subunit                                                                             | 100    | 63    | 98    |
| MCB1EB_1717 | nuoA              | NADH:ubiquinone oxidoreductase 20 kD subunit and related Fe-S oxidoreductases                                            | 100    | 95    | 100   |
| MCB1EB_1718 | RBRH_03658        | NADH:ubiquinone oxidoreductase subunit 3 (chain A)                                                                       | 100    | 82    | 100   |
| MCB1EB_1719 | -                 | Uncharacterized lipoprotein                                                                                              | 87     | 48    | 100   |
| MCB1EB_1720 | mdtB              | Membrane-fusion protein                                                                                                  | 100    | 62    | 83    |
| MCB1EB_1721 | -                 | Cation/multidrug efflux pump                                                                                             | 98     | 72    | -     |
| MCB1EB_1722 | hsdM              | Cation/multidrug efflux pump                                                                                             | 100    | 68    | -     |
| MCB1EB_1723 | -                 | Type I restriction-modification system methyltransferase subunit                                                         | -      | -     | -     |
| MCB1EB_1724 | -                 | Transposase and inactivated derivatives                                                                                  | 91-100 | -     | -     |
| MCB1EB_1725 | BamMC406_2351     | Transposase and inactivated derivatives                                                                                  | 100    | 27-34 | -     |
| MCB1EB_1726 | -                 | Transposase and inactivated derivatives                                                                                  | 99     | 44    | 98    |
| MCB1EB_1727 | -                 | Transposase and inactivated derivatives                                                                                  | 100    | 66    | -     |
| MCB1EB_1728 | Halhy_2265        | Retron-type reverse transcriptase                                                                                        | -      | -     | -     |
| MCB1EB_1729 | ACD_29C00348G0002 | Predicted NTPase (NACHT family)                                                                                          | 66-91  | -     | -     |
| MCB1EB_1730 | Dthio_PD2881      | Uncharacterized conserved protein                                                                                        | -      | -     | -     |
| MCB1EB_1731 | -                 | Hypothetical protein                                                                                                     | -      | -     | -     |
| MCB1EB_1732 | -                 | Growth inhibitor                                                                                                         | -      | -     | -     |
| MCB1EB_1733 | ihfA              | Predicted transcriptional regulators                                                                                     | 100    | 71    | 98    |
| MCB1EB_1734 | pheT              | Bacterial nucleoid DNA-binding protein                                                                                   | 100    | 65    | 95    |
| MCB1EB_1735 | pheS              | Phenylalanyl-tRNA synthetase beta subunit                                                                                | 100    | 65    | 100   |
| MCB1EB_1736 | rplT              | Phenylalanyl-tRNA synthetase alpha subunit                                                                               | 100    | 82    | 94    |
| MCB1EB_1737 | rplM              | Ribosomal protein L20                                                                                                    | 100    | 85    | 97    |
| MCB1EB_1738 | infC              | Ribosomal protein L35                                                                                                    | 100    | 83    | 100   |
| MCB1EB_1739 | thrS              | Translation initiation factor 3 (IF-3)                                                                                   | 100    | 88    | 93    |
| MCB1EB_1740 | BgramDRAFT_0571   | Threonyl-tRNA synthetase                                                                                                 | 100    | 76    | 99    |
| MCB1EB_1741 | setO              | Type III secretory pathway, component EscT                                                                               | 100    | 51    | 95    |
| MCB1EB_1742 | -                 | Hypothetical protein                                                                                                     | 100    | 34    | 80    |
| MCB1EB_1743 | BSV1_D13          | Flagellar biosynthesis/type III secretory pathway ATPase                                                                 | 100    | 72    | 98    |
| MCB1EB_1744 | A33K_17794        | Flagellar biosynthesis/type III secretory pathway protein                                                                | -      | -     | 91    |
| MCB1EB_1745 | -                 | Catalase                                                                                                                 | 100    | 27    | -     |
| MCB1EB_1746 | bglu_2g02400      | Type III secretory pathway, lipoprotein EscJ                                                                             | 100    | -     | -     |
| MCB1EB_1747 | BUPH_00152        | Hypothetical protein                                                                                                     | 100    | -     | -     |
| MCB1EB_1748 | BURK_021220       | Hypothetical protein                                                                                                     | 100    | -     | -     |
| MCB1EB_1749 | -                 | DNA uptake protein and related DNA-binding proteins                                                                      | 100    | -     | 99    |
| MCB1EB_1750 | -                 | Nucleoside-diphosphate-sugar epimerases                                                                                  | 100    | 76    | 91    |
| MCB1EB_1751 | -                 | ADP-heptose synthase, bifunctional sugar kinase/adenylyltransferase                                                      | 100    | 68    | 99    |
| MCB1EB_1752 | -                 | Predicted UDP-glucose 6-dehydrogenase                                                                                    | 100    | 73    | 100   |
| MCB1EB_1753 | -                 | Predicted N-acetylglucosaminyl transferase                                                                               | 100    | 68    | -     |
| MCB1EB_1754 | SG0766            | Uncharacterized integral membrane protein                                                                                | 100    | -     | -     |
| MCB1EB_1755 | BATDEDRAFT_91794  | Uncharacterized conserved protein                                                                                        | 100    | 38    | -     |
| MCB1EB_1756 | ihfB              | Glucosylase and related glycosyl hydrolases                                                                              | 100    | -     | -     |
| MCB1EB_1757 | rpsA              | Bacterial nucleoid DNA-binding protein                                                                                   | 100    | 76    | 99    |
| MCB1EB_1758 | cmk               | Ribosomal protein S1                                                                                                     | 100    | 85    | 100   |
| MCB1EB_1759 | aroA              | Cytidylate kinase                                                                                                        | 100    | 67    | 88    |
| MCB1EB_1760 | tyrA              | 5-enolpyruvylshikimate-3-phosphate synthase                                                                              | 100    | 65    | 100   |
| MCB1EB_1761 | pheA              | Prephenate dehydrogenase                                                                                                 | 100    | 57    | 93    |

|             |                   |                                                                                                     |        |       |     |
|-------------|-------------------|-----------------------------------------------------------------------------------------------------|--------|-------|-----|
| MCB1EB_1762 | serC              | Prephenate dehydratase                                                                              | 100    | 67    | 100 |
| MCB1EB_1763 | -                 | Phosphoserine aminotransferase                                                                      | 100    | 71    | 100 |
| MCB1EB_1764 | gyrA              | Hypothetical protein                                                                                | 100    | 66    | 92  |
| MCB1EB_1765 | -                 | Type IIA topoisomerase (DNA gyrase/topo II, topoisomerase IV), A subunit                            | 100    | 85    | 99  |
| MCB1EB_1766 | ubiG              | Outer membrane protein and related peptidoglycan-associated (lipo)proteins                          | 100    | 69    | 99  |
| MCB1EB_1767 | gph               | 2-polyisoprenyl-3-methyl-5-nyaroxy-6-methoxy-1,4-benzoquinone                                       | 100    | 72    | 99  |
| MCB1EB_1768 | smc               | Predicted phosphatases                                                                              | 100    | 61    | 91  |
| MCB1EB_1769 | KYC_15302         | Cell division protein FtsI/penicillin-binding protein 2                                             | 100    | -     | -   |
| MCB1EB_1770 | -                 | Outer membrane receptor proteins, mostly Fe transport                                               | 98     | 55    | 94  |
| MCB1EB_1771 | LipB              | Predicted acetyltransferases and hydrolases with the alpha/beta hydrolase fold                      | 100    | -     | -   |
| MCB1EB_1772 | trmB              | Lipase chaperone                                                                                    | 85     | -     | -   |
| MCB1EB_1773 | upk               | Predicted S-adenosylmethionine-dependent methyltransferase                                          | 100    | -     | -   |
| MCB1EB_1774 | BgramDRAFT_3578   | Uncharacterized bacitracin resistance protein                                                       | 100    | 67    | 91  |
| MCB1EB_1775 | -                 | Hypothetical protein                                                                                | 100    | -     | -   |
| MCB1EB_1776 | kdtA              | Protein-L-isoaspartate carboxylmethyltransferase                                                    | 100    | 65    | 100 |
| MCB1EB_1777 | rfaC              | 3-deoxy-D-manno-octulosonic-acid transferase                                                        | 100    | 67    | 99  |
| MCB1EB_1778 | -                 | ADP-heptose-LPS heptosyltransferase                                                                 | 100    | 65    | 100 |
| MCB1EB_1779 | -                 | Phosphomannomutase                                                                                  | 100    | 80    | 100 |
| MCB1EB_1780 | CAGGBEG34_200099  | UDP-glucose 4-epimerase                                                                             | 100    | 72    | 98  |
| MCB1EB_1781 | PanABDRAFT_2554   | Predicted glycosyltransferases                                                                      | 100    | 52    | 98  |
| MCB1EB_1782 | -                 | SAM-dependent methyltransferases                                                                    | 100    | -     | -   |
| MCB1EB_1783 | Rta_08890         | ABC-type polysaccharide/polyol phosphate transport system, ATPase component                         | 100    | 41    | 95  |
| MCB1EB_1784 | wbpM              | ABC-type polysaccharide/polyol phosphate export systems, permease component                         | 93     | 33    | 81  |
| MCB1EB_1785 | CAGGBEG34_260027  | Predicted nucleoside-diphosphate sugar epimerases                                                   | 100    | 71    | 98  |
| MCB1EB_1786 | CAGGBEG34_190057  | UDP-N-acetylmuramyl pentapeptide phosphotransferase/UDP-N-acetylglucosamine-1-phosphate transferase | 100    | 54    | 96  |
| MCB1EB_1787 | ndrR              | Nucleoside-diphosphate-sugar epimerases                                                             | 100    | 53    | 97  |
| MCB1EB_1788 | glyA              | Predicted transcriptional regulator, consists of a Zn-ribbon and ATP-cone domains                   | 92     | 76    | 98  |
| MCB1EB_1789 | -                 | Glycine/serine hydroxymethyltransferase                                                             | 100    | 88    | 100 |
| MCB1EB_1790 | -                 | Short-chain alcohol dehydrogenase of unknown specificity                                            | 100    | 31    | 95  |
| MCB1EB_1791 | tolR              | Biopolymer transport proteins                                                                       | 100    | 82    | 97  |
| MCB1EB_1792 | Bphy_2454         | Biopolymer transport protein                                                                        | 100    | 52    | 98  |
| MCB1EB_1793 | tolB              | Hypothetical protein                                                                                | 100    | 41    | 99  |
| MCB1EB_1794 | pal               | Periplasmic component of the Tol biopolymer transport system                                        | 100    | 67    | 100 |
| MCB1EB_1795 | -                 | Outer membrane protein and related peptidoglycan-associated (lipo)proteins                          | 100    | 71    | 99  |
| MCB1EB_1796 | NTGR_280108       | Uncharacterized protein conserved in bacteria                                                       | 100    | 60    | 86  |
| MCB1EB_1797 | HMPREF9701_05507  | Integrase                                                                                           | -      | -     | -   |
| MCB1EB_1798 | NTGR_280106       | Hypothetical protein                                                                                | -      | -     | -   |
| MCB1EB_1799 | -                 | Hypothetical protein                                                                                | -      | -     | -   |
| MCB1EB_1800 | Nhal_0976         | Superfamily II helicase and inactivated derivatives                                                 | -      | -     | -   |
| MCB1EB_1801 | MGM0_44c00340     | ABC-type antimicrobial peptide transport system, permease component                                 | -      | -     | -   |
| MCB1EB_1802 | RSe2474           | Hypothetical protein                                                                                | -      | -     | -   |
| MCB1EB_1803 | L810_8411         | Hypothetical protein                                                                                | -      | -     | -   |
| MCB1EB_1804 | OR16_03807        | Transcriptional regulator                                                                           | 98     | 32    | 87  |
| MCB1EB_1805 | LYNGBM3L_24300    | Spermidine/putrescine-binding periplasmic protein                                                   | 99-100 | -     | -   |
| MCB1EB_1806 | -                 | Predicted NTPase (NACHT family)                                                                     | 66-91  | -     | -   |
| MCB1EB_1807 | -                 | Hypothetical protein                                                                                | -      | -     | -   |
| MCB1EB_1808 | istB              | Transposase and inactivated derivatives                                                             | -      | 54-55 | -   |
| MCB1EB_1809 | BCh11DRAFT_03152  | DNA replication protein                                                                             | -      | 66    | -   |
| MCB1EB_1810 | -                 | NAD-dependent aldehyde dehydrogenases                                                               | -      | -     | -   |
| MCB1EB_1811 | CAGGBEG34_800003  | Hypothetical protein                                                                                | -      | -     | -   |
| MCB1EB_1812 | -                 | Uncharacterized conserved protein                                                                   | -      | -     | -   |
| MCB1EB_1813 | IPF_2632          | Bacterial nucleoid DNA-binding protein                                                              | -      | 54    | 97  |
| MCB1EB_1814 | -                 | FOG: HEAT repeat                                                                                    | -      | -     | -   |
| MCB1EB_1815 | MSS3_0328         | Predicted NTPase (NACHT family)                                                                     | 66-91  | -     | -   |
| MCB1EB_1816 | -                 | Permeases of the major facilitator superfamily                                                      | -      | -     | -   |
| MCB1EB_1817 | RoseRS_4025       | Integrase                                                                                           | -      | -     | -   |
| MCB1EB_1818 | Acife_0758        | Predicted NTPase (NACHT family)                                                                     | 44-65  | -     | -   |
| MCB1EB_1819 | -                 | Hypothetical protein                                                                                | -      | -     | -   |
| MCB1EB_1820 | BamMC406_2351     | Transposase and inactivated derivatives                                                             | 100    | 66    | -   |
| MCB1EB_1821 | SFV_0255          | Transposase and inactivated derivatives                                                             | -      | 39    | -   |
| MCB1EB_1822 | -                 | Hypothetical protein                                                                                | 99     | -     | -   |
| MCB1EB_1823 | CAGGBEG34_220024  | Hypothetical protein                                                                                | 100    | 73    | 99  |
| MCB1EB_1824 | CAGGBEG34_330054  | Permeases of the major facilitator superfamily                                                      | 100    | 54    | 95  |
| MCB1EB_1825 | MC7420_7550       | Hypothetical protein                                                                                | -      | -     | -   |
| MCB1EB_1826 | HMPREF9419_1228   | Predicted NTPase (NACHT family)                                                                     | 66-91  | -     | -   |
| MCB1EB_1827 | Hoch_4507         | Uncharacterized Fe-S oxidoreductase                                                                 | 98     | -     | -   |
| MCB1EB_1828 | SSDG_00272        | NaMN:DMB phosphoribosyltransferase                                                                  | -      | -     | -   |
| MCB1EB_1829 | -                 | Hypothetical protein                                                                                | -      | -     | -   |
| MCB1EB_1830 | -                 | Transposase and inactivated derivatives                                                             | -      | -     | -   |
| MCB1EB_1831 | CARN7_2937        | Transposase and inactivated derivatives                                                             | 100    | -     | -   |
| MCB1EB_1832 | -                 | Transposase and inactivated derivatives                                                             | 100    | -     | -   |
| MCB1EB_1833 | FGSG_13479        | DNA replication protein                                                                             | -      | -     | -   |
| MCB1EB_1834 | -                 | FOG: HEAT repeat                                                                                    | -      | -     | -   |
| MCB1EB_1835 | -                 | Transposase and inactivated derivatives                                                             | -      | -     | -   |
| MCB1EB_1836 | Pse7429DRAFT_2799 | Transposase and inactivated derivatives                                                             | 100    | 56-66 | 97  |
| MCB1EB_1837 | STIAU_8367        | Predicted NTPase (NACHT family)                                                                     | -      | -     | -   |
| MCB1EB_1838 | -                 | Hypothetical protein                                                                                | -      | -     | -   |
| MCB1EB_1839 | CMQ_3643          | Transposase and inactivated derivatives                                                             | -      | -     | -   |
| MCB1EB_1840 | O203_19195        | Hypothetical protein                                                                                | -      | -     | -   |
| MCB1EB_1841 | O203_19190        | Hypothetical protein                                                                                | 75     | -     | -   |
| MCB1EB_1842 | -                 | Uncharacterized conserved protein                                                                   | 100    | -     | -   |
| MCB1EB_1843 | -                 | Transposase and inactivated derivatives                                                             | 97     | -     | -   |
| MCB1EB_1844 | -                 | Transposase and inactivated derivatives                                                             | -      | -     | -   |
| MCB1EB_1845 | -                 | Transposase and inactivated derivatives                                                             | -      | -     | -   |
| MCB1EB_1846 | -                 | Transposase and inactivated derivatives                                                             | -      | -     | -   |
| MCB1EB_1847 | -                 | Transposase and inactivated derivatives                                                             | -      | -     | -   |
| MCB1EB_1848 | LYNGBM3L_24300    | DNA replication protein                                                                             | -      | -     | -   |
| MCB1EB_1849 | -                 | Predicted NTPase (NACHT family)                                                                     | 66-91  | -     | -   |
| MCB1EB_1850 | -                 | Predicted NTPase (NACHT family)                                                                     | 66-91  | -     | -   |
| MCB1EB_1851 | P9215_14271       | Transposase and inactivated derivatives                                                             | 100    | -     | -   |
| MCB1EB_1852 | metB              | Methyl-accepting chemotaxis protein                                                                 | 79     | -     | -   |
| MCB1EB_1853 | purF              | Cystathionine beta-lyases/cystathionine gamma-synthases                                             | 100    | 73    | 98  |
| MCB1EB_1854 | -                 | Glutamine phosphoribosylpyrophosphate amidotransferase                                              | 100    | 79    | 100 |
| MCB1EB_1855 | P355_3030         | Uncharacterized membrane protein, required for colicin V production                                 | 100    | 52    | 97  |
| MCB1EB_1856 | folC              | Uncharacterized protein conserved in bacteria                                                       | 100    | 54    | 18  |
| MCB1EB_1857 | accD              | Folypolyglutamate synthase                                                                          | 100    | 71    | 100 |
| MCB1EB_1858 | trpA              | Acetyl-CoA carboxylase beta subunit                                                                 | 100    | 86    | 99  |
| MCB1EB_1859 | trpB              | Tryptophan synthase alpha chain                                                                     | 92     | 71    | 97  |
| MCB1EB_1860 | -                 | Tryptophan synthase beta chain                                                                      | 100    | 83    | 100 |
| MCB1EB_1861 | truA              | Phosphoribosylanthranilate isomerase                                                                | 100    | 59    | 93  |

|             |                  |                                                                                                                                                                                 |        |       |     |
|-------------|------------------|---------------------------------------------------------------------------------------------------------------------------------------------------------------------------------|--------|-------|-----|
| MCB1EB_1862 | asd              | Pseudouridylylase                                                                                                                                                               | 100    | 70    | 100 |
| MCB1EB_1863 | leuB1            | Aspartate-semialdehyde dehydrogenase                                                                                                                                            | 100    | 72    | 98  |
| MCB1EB_1864 | gltA             | Isocitrate/isopropylmalate dehydrogenase                                                                                                                                        | 100    | 79    | 99  |
| MCB1EB_1865 | -                | Citrate synthase                                                                                                                                                                | 100    | 88    | 100 |
| MCB1EB_1866 | sdhB             | Uncharacterized conserved protein                                                                                                                                               | 100    | 71    | 97  |
| MCB1EB_1867 | sdhA             | Succinate dehydrogenase/fumarate reductase, Fe-S protein subunit                                                                                                                | 100    | 75    | 50  |
| MCB1EB_1868 | -                | Succinate dehydrogenase/fumarate reductase, flavoprotein subunit                                                                                                                | 100    | 86    | 100 |
| MCB1EB_1869 | EUOG_04987       | Succinate dehydrogenase, hydrophobic anchor subunit                                                                                                                             | 100    | 73    | 100 |
| MCB1EB_1870 | SG0766           | Uncharacterized conserved protein                                                                                                                                               | -      | -     | -   |
| MCB1EB_1871 | -                | Uncharacterized conserved protein                                                                                                                                               | 98-100 | 38-39 | -   |
| MCB1EB_1872 | mdh              | Transcriptional regulators                                                                                                                                                      | 100    | 76    | 89  |
| MCB1EB_1873 | RBRH_00165       | Malate/lactate dehydrogenases                                                                                                                                                   | 100    | 79    | 100 |
| MCB1EB_1874 | acnA             | Hypothetical protein                                                                                                                                                            | 100    | -     | -   |
| MCB1EB_1875 | thrC             | Aconitase A                                                                                                                                                                     | 100    | 77    | 100 |
| MCB1EB_1876 | thrA             | Threonine synthase                                                                                                                                                              | 100    | 71    | 100 |
| MCB1EB_1877 | -                | Homoserine dehydrogenase                                                                                                                                                        | 100    | 70    | 99  |
| MCB1EB_1878 | aroE             | Na <sup>+</sup> /citrate symporter                                                                                                                                              | 91-94  | 54-56 | -   |
| MCB1EB_1879 | -                | Shikimate 5-dehydrogenase                                                                                                                                                       | 100    | 64    | 96  |
| MCB1EB_1880 | mpl              | Exoribonuclease R                                                                                                                                                               | 100    | 66    | 100 |
| MCB1EB_1881 | pYS10087         | UDP-N-acetylmuramate-alanine ligase                                                                                                                                             | 100    | 73    | 97  |
| MCB1EB_1882 | Y69_0155         | Cation transport ATPase                                                                                                                                                         | -      | -     | -   |
| MCB1EB_1883 | K788_3090        | NhaP-type Na <sup>+</sup> /H <sup>+</sup> and K <sup>+</sup> /H <sup>+</sup> antiporters                                                                                        | -      | -     | -   |
| MCB1EB_1884 | K788_3091        | Uncharacterized protein conserved in bacteria                                                                                                                                   | 100    | -     | -   |
| MCB1EB_1885 | -                | Uncharacterized protein conserved in bacteria                                                                                                                                   | 100    | -     | -   |
| MCB1EB_1886 | rnc              | Uncharacterized protein conserved in bacteria                                                                                                                                   | 100    | -     | -   |
| MCB1EB_1887 | PMI06_000449     | Integrase                                                                                                                                                                       | 100    | -     | -   |
| MCB1EB_1888 | -                | Uncharacterized protein conserved in bacteria                                                                                                                                   | 100    | -     | -   |
| MCB1EB_1889 | -                | Hypothetical protein                                                                                                                                                            | 100    | -     | -   |
| MCB1EB_1890 | WQE_10019        | ATPases with chaperone activity, ATP-binding subunit                                                                                                                            | 100    | -     | -   |
| MCB1EB_1891 | WQE_10014        | Uncharacterized protein conserved in bacteria                                                                                                                                   | 100    | -     | -   |
| MCB1EB_1892 | WQE_10009        | Uncharacterized protein conserved in bacteria                                                                                                                                   | 100    | -     | -   |
| MCB1EB_1893 | CFII68_20828     | Uncharacterized protein conserved in bacteria                                                                                                                                   | 100    | -     | -   |
| MCB1EB_1894 | tssC-2           | Hemolysin-coregulated protein (uncharacterized)                                                                                                                                 | 100    | -     | -   |
| MCB1EB_1895 | -                | Uncharacterized protein conserved in bacteria                                                                                                                                   | 100    | -     | -   |
| MCB1EB_1896 | K788_3104        | Uncharacterized protein conserved in bacteria                                                                                                                                   | 100    | -     | -   |
| MCB1EB_1897 | BC1002_2680      | Uncharacterized protein conserved in bacteria                                                                                                                                   | 100    | -     | -   |
| MCB1EB_1898 | aroQ             | Thiol-disulfide isomerase and thioredoxins                                                                                                                                      | 100    | -     | -   |
| MCB1EB_1899 | bccP             | 3-dehydroquinate dehydratase II                                                                                                                                                 | 100    | 62    | 98  |
| MCB1EB_1900 | accC             | Biotin carboxyl carrier protein                                                                                                                                                 | 100    | 74    | 100 |
| MCB1EB_1901 | prmA             | Biotin carboxylase                                                                                                                                                              | 100    | 89    | 100 |
| MCB1EB_1902 | tpx              | Ribosomal protein L11 methylase                                                                                                                                                 | 100    | 62    | 97  |
| MCB1EB_1903 | -                | Peroxioredoxin                                                                                                                                                                  | 100    | 72    | 100 |
| MCB1EB_1904 | -                | Sugar kinases, ribokinase family                                                                                                                                                | 100    | 66    | 100 |
| MCB1EB_1905 | LOC431817        | Outer membrane lipoprotein                                                                                                                                                      | 100    | 64    | 97  |
| MCB1EB_1906 | nrdB             | Hypothetical protein                                                                                                                                                            | 100    | -     | -   |
| MCB1EB_1907 | nrdA             | Ribonucleotide reductase, beta subunit                                                                                                                                          | 100    | 82    | 100 |
| MCB1EB_1908 | ampD             | Ribonucleotide reductase, alpha subunit                                                                                                                                         | 100    | 82    | 96  |
| MCB1EB_1909 | -                | Negative regulator of beta-lactamase expression                                                                                                                                 | 100    | 61    | -   |
| MCB1EB_1910 | flh              | ABC-type uncharacterized transport system, permease component                                                                                                                   | 100    | 60    | 100 |
| MCB1EB_1911 | RoseRS_4025      | Signal recognition particle GTPase                                                                                                                                              | 100    | 78    | 100 |
| MCB1EB_1912 | -                | Predicted NTPase (NACHT family)                                                                                                                                                 | -      | -     | -   |
| MCB1EB_1913 | proS             | Multiple antibiotic transporter                                                                                                                                                 | 100    | 70    | 99  |
| MCB1EB_1914 | nudH             | Prolyl-tRNA synthetase                                                                                                                                                          | 100    | 74    | 100 |
| MCB1EB_1915 | proB             | NTP pyrophosphohydrolases including oxidative damage repair enzymes                                                                                                             | 100    | -     | -   |
| MCB1EB_1916 | obgE             | Glutamate 5-kinase                                                                                                                                                              | 100    | 81    | 96  |
| MCB1EB_1917 | rpmA             | Predicted GTPase                                                                                                                                                                | 100    | 81    | 99  |
| MCB1EB_1918 | rplU             | Ribosomal protein L27                                                                                                                                                           | 100    | 86    | 99  |
| MCB1EB_1919 | -                | Ribosomal protein L21                                                                                                                                                           | 100    | 88    | 99  |
| MCB1EB_1920 | -                | Cytochrome c553                                                                                                                                                                 | 98     | 72    | 84  |
| MCB1EB_1921 | -                | Cytochrome c, mono- and di-heme variants                                                                                                                                        | 100    | 77    | 90  |
| MCB1EB_1922 | miaB             | Hypothetical protein                                                                                                                                                            | 100    | 70    | 99  |
| MCB1EB_1923 | -                | 2-methylthioadenine synthetase                                                                                                                                                  | 100    | -     | -   |
| MCB1EB_1924 | -                | Predicted metal-dependent hydrolase                                                                                                                                             | 100    | 62    | 99  |
| MCB1EB_1925 | -                | Uncharacterized protein involved in cation transport                                                                                                                            | 100    | 61    | 94  |
| MCB1EB_1926 | Int              | Putative Mg <sup>2+</sup> and Co <sup>2+</sup> transporter CorC                                                                                                                 | 100    | 80    | 100 |
| MCB1EB_1927 | COXBURSA334_1537 | Apolipoprotein N-acyltransferase                                                                                                                                                | 100    | 58    | 93  |
| MCB1EB_1928 | glyQ             | Hypothetical protein                                                                                                                                                            | 100    | -     | -   |
| MCB1EB_1929 | glyS             | Glycyl-tRNA synthetase, alpha subunit                                                                                                                                           | 100    | -     | -   |
| MCB1EB_1930 | gmhB             | Glycyl-tRNA synthetase, beta subunit                                                                                                                                            | 100    | 65    | 97  |
| MCB1EB_1931 | -                | Histidinol phosphatase and related phosphatases                                                                                                                                 | 100    | -     | -   |
| MCB1EB_1932 | ksgA             | 1-acyl-sn-glycerol-3-phosphate acyltransferase                                                                                                                                  | 82     | -     | 94  |
| MCB1EB_1933 | pdxA             | Dimethyladenosine transferase (rRNA methylation)                                                                                                                                | 100    | 69    | 97  |
| MCB1EB_1934 | surA             | Pyridoxal phosphate biosynthesis protein                                                                                                                                        | 100    | -     | -   |
| MCB1EB_1935 | -                | Parvulin-like peptidyl-prolyl isomerase                                                                                                                                         | 100    | -     | -   |
| MCB1EB_1936 | -                | Organic solvent tolerance protein OstA                                                                                                                                          | 100    | 59    | 100 |
| MCB1EB_1937 | -                | Predicted phosphotransferase related to Ser/Thr protein kinases                                                                                                                 | 100    | -     | -   |
| MCB1EB_1938 | -                | Predicted acetyltransferase                                                                                                                                                     | -      | -     | -   |
| MCB1EB_1939 | A33K_14291       | Nucleoside-diphosphate-sugar pyrophosphorylase involved in lipopolysaccharide biosynthesis/translation initiation factor 2B, gamma/epsilon subunits (eIF-2Bgamma/eIF-2Bepsilon) | 100    | -     | 98  |
| MCB1EB_1940 | fis              | 2-polyprenyl-6-methoxyphenol hydroxylase and related FAD-dependent oxidoreductases                                                                                              | 100    | 54    | 100 |
| MCB1EB_1941 | purH             | Factor for inversion stimulation Fis, transcriptional activator                                                                                                                 | 100    | 65    | 100 |
| MCB1EB_1942 | ruvC             | AICAR transformylase/IMP cyclohydrolase PurH (only IMP cyclohydrolase domain in Aful)                                                                                           | 100    | 75    | 99  |
| MCB1EB_1943 | ruvA             | Holliday junction resolvase, endonuclease subunit                                                                                                                               | 100    | 75    | 99  |
| MCB1EB_1944 | ruvB             | Holliday junction resolvase, DNA-binding subunit                                                                                                                                | 100    | 79    | 99  |
| MCB1EB_1945 | tyrS             | Holliday junction resolvase, helicase subunit                                                                                                                                   | 100    | 84    | 97  |
| MCB1EB_1946 | amK              | Tyrosyl-tRNA synthetase                                                                                                                                                         | 100    | 83    | -   |
| MCB1EB_1947 | gecP             | Predicted molecular chaperone distantly related to HSP70-fold metalloproteases                                                                                                  | 100    | -     | 98  |
| MCB1EB_1948 | -                | Glycine cleavage system protein P (pyridoxal-binding), C-terminal domain                                                                                                        | 100    | 72    | 100 |
| MCB1EB_1949 | gecT             | Glycine cleavage system H protein (lipote-binding)                                                                                                                              | 99     | 62    | 99  |
| MCB1EB_1950 | AXYL_06795       | Glycine cleavage system T protein (aminomethyltransferase)                                                                                                                      | 93     | 66    | 88  |
| MCB1EB_1951 | -                | Putative NADP-dependent oxidoreductases                                                                                                                                         | -      | -     | -   |
| MCB1EB_1952 | -                | Predicted glutamine amidotransferases                                                                                                                                           | 100    | 77    | -   |
| MCB1EB_1953 | RoseRS_4025      | Kef-type K <sup>+</sup> transport systems, membrane components                                                                                                                  | 100    | -     | -   |
| MCB1EB_1954 | elbB             | Predicted NTPase (NACHT family)                                                                                                                                                 | 70-100 | -     | -   |
| MCB1EB_1955 | -                | Uncharacterized protein involved in an early stage of isoprenoid biosynthesis                                                                                                   | 100    | -     | -   |
| MCB1EB_1956 | BURMUCGD1_0587   | Uncharacterized protein conserved in bacteria                                                                                                                                   | 100    | -     | -   |
| MCB1EB_1957 | -                | Phospholipase/lecithinase/hemolysin                                                                                                                                             | 85     | 47    | 88  |
| MCB1EB_1958 | WQE_13621        | D-alanyl-D-alanine carboxypeptidase (penicillin-binding protein 4)                                                                                                              | 96     | 56    | 91  |
| MCB1EB_1959 | -                | Hypothetical protein                                                                                                                                                            | 100    | 42    | 95  |
| MCB1EB_1960 | Haur_3755        | Putative translation factor (SUA5)                                                                                                                                              | 100    | 61    | 90  |
| MCB1EB_1961 | -                | 3-methyladenine DNA glycosylase/8-oxoguanine DNA glycosylase                                                                                                                    | 100    | -     | -   |

|             |                   |                                                                                                           |        |       |     |
|-------------|-------------------|-----------------------------------------------------------------------------------------------------------|--------|-------|-----|
| MCB1EB_1962 | RoseRS_4025       | Methylated DNA-protein cysteine methyltransferase                                                         | 100    | -     | -   |
| MCB1EB_1963 | adk               | Predicted NTPase (NACHT family)                                                                           | -      | -     | -   |
| MCB1EB_1964 | SG0735            | ATPases with chaperone activity, ATP-binding subunit                                                      | 100    | -     | -   |
| MCB1EB_1965 | purK              | Uncharacterized conserved protein                                                                         | 96     | 33-34 | 94  |
| MCB1EB_1966 | purE              | Phosphoribosylaminoimidazole carboxylase (NCAIR synthetase)                                               | 100    | 66    | 96  |
| MCB1EB_1967 | purC              | Phosphoribosylcarboxyaminoimidazole (NCAIR) mutase                                                        | 100    | 73    | 96  |
| MCB1EB_1968 | ftaA              | Phosphoribosylaminoimidazolesuccinocarboxamide (SAICAR) synthase                                          | 100    | 77    | 99  |
| MCB1EB_1969 | pgk               | Fructose-1,6-bisphosphate aldolase                                                                        | 100    | 85    | 100 |
| MCB1EB_1970 | -                 | 3-phosphoglycerate kinase                                                                                 | 100    | 74    | 99  |
| MCB1EB_1971 | rfaF              | Branched-chain amino acid aminotransferase/4-amino-4-deoxychorismate lyase                                | 100    | 78    | 100 |
| MCB1EB_1972 | BRPE64_ACD504830  | ADP-heptose:LPS heptosyltransferase                                                                       | 100    | 68    | 100 |
| MCB1EB_1973 | -                 | Hypothetical protein                                                                                      | 100    | 48    | 100 |
| MCB1EB_1974 | RoseRS_4025       | Uncharacterized protein conserved in bacteria                                                             | 100    | -     | -   |
| MCB1EB_1975 | CPAR2_208840      | Predicted NTPase (NACHT family)                                                                           | 70-100 | -     | -   |
| MCB1EB_1976 | -                 | Hypothetical protein                                                                                      | 76     | -     | -   |
| MCB1EB_1977 | -                 | Hypothetical protein                                                                                      | -      | -     | -   |
| MCB1EB_1978 | -                 | Tip pilus assembly protein, major pilin PilA                                                              | 100    | 62    | 85  |
| MCB1EB_1979 | sucD              | Membrane protein TerC, possibly involved in tellurium resistance                                          | 100    | -     | -   |
| MCB1EB_1980 | sucC              | Succinyl-CoA synthetase, alpha subunit                                                                    | 100    | 89    | 100 |
| MCB1EB_1981 | Bcep1808_2762     | Succinyl-CoA synthetase, beta subunit                                                                     | 100    | -     | -   |
| MCB1EB_1982 | recA              | Uncharacterized protein conserved in bacteria                                                             | 100    | 51    | 97  |
| MCB1EB_1983 | -                 | RecA/RadA recombinase                                                                                     | 100    | 91    | 97  |
| MCB1EB_1984 | BURMUCGD1_2804    | Cytochrome B561                                                                                           | 100    | 33    | 95  |
| MCB1EB_1985 | -                 | Uncharacterized paraquat-inducible protein A                                                              | 80     | -     | -   |
| MCB1EB_1986 | -                 | Uncharacterized paraquat-inducible protein A                                                              | 100    | -     | -   |
| MCB1EB_1987 | CAGBEG34_290002   | Paraquat-inducible protein B                                                                              | 100    | 64    | 96  |
| MCB1EB_1988 | Moth_0730         | Uncharacterized protein conserved in bacteria                                                             | 100    | 43    | 68  |
| MCB1EB_1989 | -                 | Hypothetical protein                                                                                      | 100    | -     | -   |
| MCB1EB_1990 | mnmA              | Adenylosuccinate lyase                                                                                    | 100    | 82    | 98  |
| MCB1EB_1991 | BDB_160006        | Predicted tRNA(5-methylaminomethyl-2-thiouridylate) methyltransferase, contains the PP-loop ATPase domain | 100    | 81    | 99  |
| MCB1EB_1992 | -                 | Hypothetical protein                                                                                      | 100    | -     | -   |
| MCB1EB_1993 | -                 | NAD/NADP transhydrogenase alpha subunit                                                                   | 100    | -     | -   |
| MCB1EB_1994 | -                 | NAD/NADP transhydrogenase alpha subunit                                                                   | 100    | -     | -   |
| MCB1EB_1995 | -                 | NAD/NADP transhydrogenase beta subunit                                                                    | 100    | -     | -   |
| MCB1EB_1996 | -                 | Predicted N6-adenine-specific DNA methylase                                                               | 100    | -     | -   |
| MCB1EB_1997 | -                 | Gamma-aminobutyrate permease and related permeases                                                        | 92     | 35    | -   |
| MCB1EB_1998 | -                 | Lysine 2,3-aminomutase                                                                                    | 100    | 79    | 94  |
| MCB1EB_1999 | proA              | Predicted membrane protein                                                                                | 100    | 70    | -   |
| MCB1EB_2000 | holA              | Gamma-glutamyl phosphate reductase                                                                        | 100    | 73    | 100 |
| MCB1EB_2001 | BY123_A022000     | DNA polymerase III, delta subunit                                                                         | 100    | 67    | 100 |
| MCB1EB_2002 | leuS              | Rare lipoprotein B                                                                                        | 100    | 49    | 99  |
| MCB1EB_2003 | dapB              | Leucyl-tRNA synthetase                                                                                    | 100    | 72    | 100 |
| MCB1EB_2004 | -                 | Dihydrodipicolinate reductase                                                                             | 100    | 70    | 99  |
| MCB1EB_2005 | fur1              | Small protein A (tmRNA-binding)                                                                           | 100    | -     | -   |
| MCB1EB_2006 | xopK              | Fe <sup>2+</sup> /Zn <sup>2+</sup> uptake regulation proteins                                             | 100    | 82    | 99  |
| MCB1EB_2007 | cbhG2             | Hypothetical protein                                                                                      | 92     | -     | -   |
| MCB1EB_2008 | tktA              | Glyceraldehyde-3-phosphate dehydrogenase/erythrose-4-phosphate dehydrogenase                              | 100    | -     | -   |
| MCB1EB_2009 | -                 | Transketolase                                                                                             | 100    | 77    | 99  |
| MCB1EB_2010 | rpsI              | Uncharacterized conserved protein                                                                         | 100    | 80    | 98  |
| MCB1EB_2011 | rplM              | Ribosomal protein S9                                                                                      | 100    | 88    | 100 |
| MCB1EB_2012 | recG              | Ribosomal protein L13                                                                                     | 100    | 85    | 100 |
| MCB1EB_2013 | queA              | RecG-like helicase                                                                                        | 100    | 71    | 98  |
| MCB1EB_2014 | igt               | S-adenosylmethionine:tRNA-ribosyltransferase-isomerase (queuine synthetase)                               | 100    | 71    | 99  |
| MCB1EB_2015 | yajC              | Queuine/archaeosine tRNA-ribosyltransferase                                                               | 100    | 79    | 100 |
| MCB1EB_2016 | secD              | Preprotein translocase subunit YajC                                                                       | 100    | -     | -   |
| MCB1EB_2017 | secF              | Preprotein translocase subunit SecD                                                                       | 100    | 78    | 98  |
| MCB1EB_2018 | A33K_15475        | Preprotein translocase subunit SecF                                                                       | 100    | 83    | 100 |
| MCB1EB_2019 | Bcep18194_B0308   | Transcriptional regulator                                                                                 | -      | 27    | -   |
| MCB1EB_2020 | K788_4302         | Na <sup>+</sup> /citrate symporter                                                                        | 92-97  | 46-55 | -   |
| MCB1EB_2021 | H480_14512        | Na <sup>+</sup> /citrate symporter                                                                        | -      | -     | -   |
| MCB1EB_2022 | secF              | Mg/Co/Ni transporter MgtE (contains CBS domain)                                                           | -      | -     | -   |
| MCB1EB_2023 | GUITHDRAFT_53559  | Preprotein translocase subunit SecF                                                                       | -      | -     | -   |
| MCB1EB_2024 | RS2452            | ABC-type dipeptide transport system, periplasmic component                                                | 99     | -     | -   |
| MCB1EB_2025 | -                 | Phosphatidylserine/phosphatidylglycerophosphate/cardiolipin synthases and related enzymes                 | 100    | 33    | 96  |
| MCB1EB_2026 | purN              | tRNA and tRNA cytosine-C5-methylases                                                                      | 100    | 72    | 99  |
| MCB1EB_2027 | ribF              | Folate-dependent phosphoribosylglycinamide formyltransferase PurN                                         | 100    | 65    | 100 |
| MCB1EB_2028 | ileS              | FAD synthase                                                                                              | 100    | 66    | 96  |
| MCB1EB_2029 | lspA              | Isoleucyl-tRNA synthetase                                                                                 | 97     | 76    | 99  |
| MCB1EB_2030 | dfp               | Lipoprotein signal peptidase                                                                              | 100    | 70    | 99  |
| MCB1EB_2031 | dut               | Phosphopantothoylserine synthetase/decarboxylase                                                          | 100    | 75    | 99  |
| MCB1EB_2032 | N9414_09841       | dUTPase                                                                                                   | 100    | 83    | 100 |
| MCB1EB_2033 | Centrod_0254      | FOG: WD40 repeat                                                                                          | 100    | -     | -   |
| MCB1EB_2034 | Gura_2104         | Predicted NTPase (NACHT family)                                                                           | 100    | -     | -   |
| MCB1EB_2035 | lpxC              | Uncharacterized conserved protein                                                                         | 100    | -     | -   |
| MCB1EB_2036 | ftsZ              | UDP-3-O-acyl-N-acetylglucosamine deacetylase                                                              | 100    | 86    | 100 |
| MCB1EB_2037 | ftsA              | Cell division GTPase                                                                                      | 100    | 86    | 100 |
| MCB1EB_2038 | -                 | Actin-like ATPase involved in cell division                                                               | 100    | 91    | 100 |
| MCB1EB_2039 | -                 | Cell division septal protein                                                                              | 100    | 61    | 99  |
| MCB1EB_2040 | murC              | D-alanine-D-alanine ligase and related ATP-grasp enzymes                                                  | 100    | 64    | 100 |
| MCB1EB_2041 | murG              | UDP-N-acetylmuramate-alanine ligase                                                                       | 100    | 74    | 99  |
| MCB1EB_2042 | ftsW              | UDP-N-acetylglucosamine:LPS N-acetylglucosamine transferase                                               | 100    | 67    | 98  |
| MCB1EB_2043 | murD              | Bacterial cell division membrane protein                                                                  | 100    | 79    | 100 |
| MCB1EB_2044 | mraY              | UDP-N-acetylmuramoylalanine-D-glutamate ligase                                                            | 100    | 62    | 100 |
| MCB1EB_2045 | -                 | UDP-N-acetylmuramyl pentapeptide phosphotransferase/UDP-N-acetylglucosamine-1-phosphate transferase       | 100    | 85    | 100 |
| MCB1EB_2046 | murE              | UDP-N-acetylmuramyl pentapeptide synthase                                                                 | 100    | 64    | 97  |
| MCB1EB_2047 | ftsI              | UDP-N-acetylmuramyl tripeptide synthase                                                                   | 100    | 58    | 96  |
| MCB1EB_2048 | -                 | Cell division protein FtsI/penicillin-binding protein 2                                                   | 100    | 70    | 96  |
| MCB1EB_2049 | mraW              | Cell division protein                                                                                     | 100    | -     | -   |
| MCB1EB_2050 | mraZ              | Predicted S-adenosylmethionine-dependent methyltransferase involved in cell envelope biogenesis           | 100    | 69    | 98  |
| MCB1EB_2051 | PHAVU_006G124200g | Uncharacterized protein conserved in bacteria                                                             | 100    | 79    | 100 |
| MCB1EB_2052 | Psta_3938         | Site-specific DNA methylase                                                                               | -      | -     | -   |
| MCB1EB_2053 | CLOSYM_00639      | Cobyrinic acid synthase                                                                                   | -      | -     | -   |
| MCB1EB_2054 | -                 | Hypothetical protein                                                                                      | 82     | -     | -   |
| MCB1EB_2055 | RBRH_03270        | Ubiquinone biosynthesis protein COQ7                                                                      | 100    | 66    | 100 |
| MCB1EB_2056 | fadD1             | Outer membrane protein (porin)                                                                            | 100    | 59    | 100 |
| MCB1EB_2057 | phoU              | Acyl-CoA synthetases (AMP-forming)/AMP-acid ligases II                                                    | 99     | 69    | 100 |
| MCB1EB_2058 | pstB              | Phosphate uptake regulator                                                                                | 100    | 73    | 100 |

|             |                  |                                                                                                              |     |    |     |
|-------------|------------------|--------------------------------------------------------------------------------------------------------------|-----|----|-----|
| MCB1EB_2059 | pstA             | ABC-type phosphate transport system, ATPase component                                                        | 100 | 85 | 96  |
| MCB1EB_2060 | pstC             | ABC-type phosphate transport system, permease component                                                      | 66  | 77 | 29  |
| MCB1EB_2061 | -                | ABC-type phosphate transport system, permease component                                                      | 100 | 73 | 56  |
| MCB1EB_2062 | Bcep1808_2620    | ABC-type phosphate transport system, periplasmic component                                                   | 100 | 73 | 99  |
| MCB1EB_2063 | -                | Transposase and inactivated derivatives, IS5 family                                                          | 99  | -  | -   |
| MCB1EB_2064 | ECDEC2D_3483     | Transposase and inactivated derivatives, IS5 family                                                          | 100 | -  | -   |
| MCB1EB_2065 | RO3G_00984       | FOG: Ankyrin repeat                                                                                          | 100 | -  | -   |
| MCB1EB_2066 | glmM             | FOG: WD40 repeat                                                                                             | 100 | -  | -   |
| MCB1EB_2067 | folP             | Phosphomannomutase                                                                                           | 100 | 78 | 100 |
| MCB1EB_2068 | ftsH             | Dihydropterolate synthase and related enzymes                                                                | 100 | 66 | 96  |
| MCB1EB_2069 | rmj              | ATP-dependent Zn proteases                                                                                   | 100 | 85 | 98  |
| MCB1EB_2070 | -                | 23S rRNA methylase                                                                                           | 100 | 77 | 99  |
| MCB1EB_2071 | greA             | Predicted RNA-binding protein containing KH domain, possibly ribosomal protein                               | 100 | 53 | 100 |
| MCB1EB_2072 | carB             | Transcription elongation factor                                                                              | 100 | 80 | 99  |
| MCB1EB_2073 | carA             | Carbamoylphosphate synthase large subunit (split gene in MJ)                                                 | 100 | -  | -   |
| MCB1EB_2074 | -                | Carbamoylphosphate synthase small subunit                                                                    | 100 | 76 | 97  |
| MCB1EB_2075 | -                | Ribonuclease HI                                                                                              | 99  | 76 | 96  |
| MCB1EB_2076 | PRU_2073         | SAM-dependent methyltransferases                                                                             | 100 | 62 | 99  |
| MCB1EB_2077 | -                | Permeases of the major facilitator superfamily                                                               | -   | -  | -   |
| MCB1EB_2078 | dnaQ             | Soluble lytic murein transglycosylase and related regulatory proteins (some contain LysM/invasin domains)    | 86  | -  | 77  |
| MCB1EB_2079 | Hipma_1707       | DNA polymerase III, epsilon subunit and related 3'-5' exonucleases                                           | 100 | 72 | 98  |
| MCB1EB_2080 | trwL             | Uncharacterized protein conserved in bacteria                                                                | 100 | -  | -   |
| MCB1EB_2081 | trwK             | Lysine/ornithine N-monooxygenase                                                                             | 100 | -  | -   |
| MCB1EB_2082 | trwJ             | Type IV secretory pathway, VirB4 components                                                                  | 100 | -  | -   |
| MCB1EB_2083 | trwI             | Hypothetical protein                                                                                         | 100 | -  | -   |
| MCB1EB_2084 | trwG             | Type IV secretory pathway, VirB6 components                                                                  | 40  | -  | -   |
| MCB1EB_2085 | Q652_00727       | Type IV secretory pathway, component VirB8                                                                   | 100 | -  | -   |
| MCB1EB_2086 | -                | Type IV secretory pathway, VirB9 components                                                                  | 98  | -  | -   |
| MCB1EB_2087 | trwD             | Type IV secretory pathway, VirB10 components                                                                 | 100 | -  | -   |
| MCB1EB_2088 | pyrC             | Type IV secretory pathway, VirB11 components, and related ATPases involved in archaeal flagella biosynthesis | 100 | -  | -   |
| MCB1EB_2089 | -                | Dihydroorotase                                                                                               | 100 | 77 | 95  |
| MCB1EB_2090 | -                | ABC-type branched-chain amino acid transport systems, ATPase component                                       | 95  | 76 | 99  |
| MCB1EB_2091 | -                | ABC-type branched-chain amino acid transport systems, ATPase component                                       | 100 | 81 | 97  |
| MCB1EB_2092 | -                | ABC-type branched-chain amino acid transport system, permease component                                      | 96  | 77 | 100 |
| MCB1EB_2093 | ispH             | Branched-chain amino acid ABC-type transport system, permease components                                     | 100 | 80 | 100 |
| MCB1EB_2094 | fkpB             | Penicillin tolerance protein                                                                                 | 99  | 76 | 96  |
| MCB1EB_2095 | -                | FKBP-type peptidyl-prolyl cis-trans isomerases 2                                                             | 100 | 76 | 100 |
| MCB1EB_2096 | -                | DNA repair proteins                                                                                          | 100 | 56 | 95  |
| MCB1EB_2097 | rpmG             | Ribosomal protein L28                                                                                        | 100 | 86 | 99  |
| MCB1EB_2098 | nadB             | Ribosomal protein L33                                                                                        | 100 | 80 | 100 |
| MCB1EB_2099 | -                | Aspartate oxidase                                                                                            | 100 | 77 | 98  |
| MCB1EB_2100 | rfbD             | Predicted glycosyltransferases                                                                               | 100 | -  | -   |
| MCB1EB_2101 | -                | dTDP-4-dehydrohamnose reductase                                                                              | 100 | 22 | 99  |
| MCB1EB_2102 | -                | dTDP-4-dehydrohamnose 3,5-epimerase and related enzymes                                                      | 100 | 63 | 100 |
| MCB1EB_2103 | -                | dTDP-glucose pyrophosphorylase                                                                               | 100 | 80 | 100 |
| MCB1EB_2104 | -                | dTDP-D-glucose 4,6-dehydratase                                                                               | 100 | 81 | -   |
| MCB1EB_2105 | nadC             | Glycosyltransferases involved in cell wall biogenesis                                                        | 100 | -  | -   |
| MCB1EB_2106 | nadA             | Nicotinate-nucleotide pyrophosphorylase                                                                      | 100 | 79 | 98  |
| MCB1EB_2107 | -                | Quinolinate synthase                                                                                         | 100 | 70 | 98  |
| MCB1EB_2108 | -                | Fatty-acid desaturase                                                                                        | 100 | 78 | 100 |
| MCB1EB_2109 | coaD             | Ferredoxin                                                                                                   | 100 | 75 | 99  |
| MCB1EB_2110 | -                | Phosphopantetheine adenylyltransferase                                                                       | 100 | 75 | 89  |
| MCB1EB_2111 | C266_05194       | N6-adenine-specific methylase                                                                                | 100 | 84 | 88  |
| MCB1EB_2112 | U875_21020       | Predicted Zn-dependent peptidases                                                                            | 100 | -  | -   |
| MCB1EB_2113 | ftsY             | Predicted Zn-dependent peptidases                                                                            | 95  | -  | -   |
| MCB1EB_2114 | -                | Signal recognition particle GTPase                                                                           | 100 | -  | -   |
| MCB1EB_2115 | RF_1288          | 2-keto-4-pentenoate hydratase/2-oxohepta-3-ene-1,7-dioic acid hydratase (catechol pathway)                   | 100 | 61 | 100 |
| MCB1EB_2116 | SMUL_0469        | Hypothetical protein                                                                                         | 100 | -  | -   |
| MCB1EB_2117 | hspC             | Predicted transcriptional regulators                                                                         | 100 | -  | -   |
| MCB1EB_2118 | rpoH             | Molecular chaperone (small heat shock protein)                                                               | 100 | -  | -   |
| MCB1EB_2119 | BN480_00009      | DNA-directed RNA polymerase, sigma subunit (sigma70/sigma32)                                                 | 100 | 59 | 92  |
| MCB1EB_2120 | clpA             | Hypothetical protein                                                                                         | 100 | -  | -   |
| MCB1EB_2121 | clpS             | ATPases with chaperone activity, ATP-binding subunit                                                         | 100 | 78 | 100 |
| MCB1EB_2122 | -                | Uncharacterized conserved protein                                                                            | 100 | 85 | 98  |
| MCB1EB_2123 | -                | N-acetylglucosamine-6-phosphate deacetylase                                                                  | 100 | -  | -   |
| MCB1EB_2124 | eyoE             | Uncharacterized protein SCO1/SenC/PrC, involved in biogenesis of respiratory and photosynthetic systems      | 78  | -  | 100 |
| MCB1EB_2125 | ctaA             | Polyprenyltransferase (cytochrome oxidase assembly factor)                                                   | 100 | 69 | 98  |
| MCB1EB_2126 | Bphvt_0552       | Uncharacterized protein required for cytochrome oxidase assembly                                             | 100 | 74 | 97  |
| MCB1EB_2127 | -                | Hypothetical protein                                                                                         | 100 | 64 | 89  |
| MCB1EB_2128 | HMPREF9123_2316  | Uncharacterized conserved protein                                                                            | 100 | 59 | 98  |
| MCB1EB_2129 | coxC             | Hypothetical protein                                                                                         | -   | -  | -   |
| MCB1EB_2130 | -                | Heme/copper-type cytochrome/quinol oxidase, subunit 3                                                        | 100 | 66 | 100 |
| MCB1EB_2131 | coxB             | Heme/copper-type cytochrome/quinol oxidases, subunit 1                                                       | 100 | 77 | 100 |
| MCB1EB_2132 | bioC             | Heme/copper-type cytochrome/quinol oxidases, subunit 2                                                       | 100 | 85 | 91  |
| MCB1EB_2133 | CAGGBEG34_180067 | SAM-dependent methyltransferases                                                                             | 100 | 71 | 98  |
| MCB1EB_2134 | yibK             | Predicted amidophosphoribosyltransferases                                                                    | 78  | -  | -   |
| MCB1EB_2135 | gpsA             | Predicted rRNA methylase (SpoU class)                                                                        | 100 | 56 | 100 |
| MCB1EB_2136 | secB             | Glycerol-3-phosphate dehydrogenase                                                                           | 100 | 67 | 98  |
| MCB1EB_2137 | grxC             | Preprotein translocase subunit SecB                                                                          | 100 | 70 | 78  |
| MCB1EB_2138 | -                | Glutaredoxin and related proteins                                                                            | 100 | 69 | 95  |
| MCB1EB_2139 | gpmA             | Rhodanese-related sulfurtransferase                                                                          | 87  | -  | 67  |
| MCB1EB_2140 | -                | Phosphoglycerate mutase 1                                                                                    | 100 | 75 | 92  |
| MCB1EB_2141 | thiF             | Periplasmic protease                                                                                         | 100 | -  | -   |
| MCB1EB_2142 | -                | Dimucleotide-utilizing enzymes involved in molybdopterin and thiamine biosynthesis family 2                  | 100 | 65 | 99  |
| MCB1EB_2143 | icd              | Cold shock proteins                                                                                          | 100 | -  | -   |
| MCB1EB_2144 | Naga_100008g11   | Isocitrate dehydrogenases                                                                                    | 100 | 87 | 100 |
| MCB1EB_2145 | -                | Hypothetical protein                                                                                         | 100 | -  | -   |
| MCB1EB_2146 | sodB             | Uncharacterized conserved protein                                                                            | -   | -  | -   |
| MCB1EB_2147 | xseA             | Superoxide dismutase                                                                                         | 100 | 83 | 99  |
| MCB1EB_2148 | lpxK             | Exonuclease VII, large subunit                                                                               | 100 | 60 | 97  |
| MCB1EB_2149 | -                | Tetraacyldisaccharide-1-P 4'-kinase                                                                          | 100 | -  | -   |
| MCB1EB_2150 | kdsB             | Uncharacterized conserved protein                                                                            | 100 | 67 | 96  |
| MCB1EB_2151 | adk              | CMP-2-keto-3-deoxyoctulosonic acid synthetase                                                                | 100 | 63 | 90  |
| MCB1EB_2152 | mviN             | Adenylate kinase and related kinases                                                                         | 100 | 72 | 100 |
| MCB1EB_2153 | rpsN             | Uncharacterized membrane protein, putative virulence factor                                                  | 100 | 73 | 100 |
| MCB1EB_2154 | -                | Ribosomal protein S20                                                                                        | 100 | 81 | 96  |

|             |                  |                                                                                 |       |       |     |
|-------------|------------------|---------------------------------------------------------------------------------|-------|-------|-----|
| MCB1EB_2155 | argF             | Hypothetical protein                                                            | 100   | -     | -   |
| MCB1EB_2156 | -                | Ornithine carbamoyltransferase                                                  | 100   | 81    | 100 |
| MCB1EB_2157 | murB             | Argininosuccinate synthase                                                      | 100   | 29    | 85  |
| MCB1EB_2158 | -                | UDP-N-acetylmuramate dehydrogenase                                              | 100   | 57    | 99  |
| MCB1EB_2159 | h16_A0588        | Uncharacterized protein conserved in bacteria                                   | 100   | 78    | 100 |
| MCB1EB_2160 | WQE_06227        | Predicted membrane protein                                                      | 100   | 66    | 98  |
| MCB1EB_2161 | ppa              | Acyl-CoA synthetases (AMP-forming)/AMP-acid ligases II                          | 100   | -     | -   |
| MCB1EB_2162 | xerD             | Inorganic pyrophosphatase                                                       | 100   | 82    | 100 |
| MCB1EB_2163 | ogt              | Site-specific recombinase XerD                                                  | 100   | 73    | 95  |
| MCB1EB_2164 | HMPREF9718_00701 | Methylated DNA-protein cysteine methyltransferase                               | 100   | 63    | 90  |
| MCB1EB_2165 | -                | Hypothetical protein                                                            | 100   | -     | -   |
| MCB1EB_2166 | bgla_1g32700     | Uncharacterized Fe-S protein                                                    | 100   | 68    | 96  |
| MCB1EB_2167 | amiA             | Predicted ATPase or kinase                                                      | 100   | 59    | 95  |
| MCB1EB_2168 | dedA             | N-acetylmuramoyl-L-alanine amidase                                              | 99    | 62    | 100 |
| MCB1EB_2169 | mutL             | Uncharacterized membrane-associated protein                                     | 100   | 69    | 100 |
| MCB1EB_2170 | miaA             | DNA mismatch repair enzyme (predicted ATPase)                                   | 100   | 65    | -   |
| MCB1EB_2171 | purM             | tRNA delta(2)-isopentenylpyrophosphate transferase                              | 100   | 59    | -   |
| MCB1EB_2172 | -                | Phosphoribosylaminoimidazole (AIR) synthetase                                   | 100   | 75    | 99  |
| MCB1EB_2173 | -                | ATPase involved in DNA replication initiation                                   | 100   | 58    | 94  |
| MCB1EB_2174 | pcnB             | Phosphoserine phosphatase                                                       | 100   | 67    | 100 |
| MCB1EB_2175 | panB             | tRNA nucleotidyltransferase/poly(A) polymerase                                  | 100   | 71    | 94  |
| MCB1EB_2176 | -                | Ketopantoate hydroxymethyltransferase                                           | 100   | -     | 98  |
| MCB1EB_2177 | -                | DNA-binding protein H-NS                                                        | 100   | -     | 52  |
| MCB1EB_2178 | WQE_15091        | ABC-type branched-chain amino acid transport systems, periplasmic component     | 100   | 72    | 99  |
| MCB1EB_2179 | -                | Hypothetical protein                                                            | 85    | -     | 87  |
| MCB1EB_2180 | -                | Metal-dependent hydrolase                                                       | 100   | -     | 95  |
| MCB1EB_2181 | CAGGBEG34_220056 | Flavodoxin reductases (ferredoxin-NADPH reductases) family 1                    | 100   | 67    | 93  |
| MCB1EB_2182 | -                | Flagellar biogenesis protein                                                    | 99    | 80    | -   |
| MCB1EB_2183 | -                | Di- and tricarboxylate transporters                                             | 100   | -     | -   |
| MCB1EB_2184 | appB             | Cytochrome bd-type quinol oxidase, subunit 1                                    | 100   | 69    | 100 |
| MCB1EB_2185 | yrohd0001_33870  | Cytochrome bd-type quinol oxidase, subunit 2                                    | 100   | 63    | 100 |
| MCB1EB_2186 | -                | Hypothetical protein                                                            | 100   | -     | -   |
| MCB1EB_2187 | WQE_14941        | Protein involved in biosynthesis of mitomycin antibiotics/polyketide fumonisins | 100   | 63    | 98  |
| MCB1EB_2188 | BH160DRAFT_0871  | Formamidopyrimidine-DNA glycosylase                                             | 100   | -     | -   |
| MCB1EB_2189 | WQE_29953        | Predicted N-acetylglucosamine kinase                                            | 100   | -     | -   |
| MCB1EB_2190 | serA             | DNA-binding protein H-NS                                                        | 100   | -     | -   |
| MCB1EB_2191 | YN1551_2013      | Phosphoglycerate dehydrogenase and related dehydrogenases                       | 100   | 76    | 95  |
| MCB1EB_2192 | leuD             | FOG: Ankyrin repeat                                                             | 100   | -     | -   |
| MCB1EB_2193 | leuC             | 3-isopropylmalate dehydratase small subunit                                     | 100   | 75    | 100 |
| MCB1EB_2194 | ptsI             | 3-isopropylmalate dehydratase large subunit                                     | 100   | 81    | 100 |
| MCB1EB_2195 | pstH             | Phosphoenolpyruvate-protein kinase (PTS system EI component in bacteria)        | 100   | 75    | 100 |
| MCB1EB_2196 | -                | Phosphotransferase system, HPr-related proteins                                 | 100   | 74    | 99  |
| MCB1EB_2197 | -                | Phosphotransferase system, mannose/fructose-specific component IIA              | 100   | 66    | 90  |
| MCB1EB_2198 | -                | Nitrogen regulatory protein PII                                                 | 100   | 87    | 100 |
| MCB1EB_2199 | -                | Uncharacterized protein conserved in bacteria                                   | 100   | 59    | 99  |
| MCB1EB_2200 | -                | Predicted ATPase with chaperone activity                                        | 100   | 65    | 99  |
| MCB1EB_2201 | -                | Thiol-disulfide isomerase and thioredoxins                                      | 99    | -     | -   |
| MCB1EB_2202 | -                | Uncharacterized conserved protein                                               | -     | -     | -   |
| MCB1EB_2203 | -                | small molecule metabolism                                                       | 100   | 84    | -   |
| MCB1EB_2204 | metHa            | Hypothetical protein                                                            | 100   | 66    | 100 |
| MCB1EB_2205 | metHb            | nicotinamide synthase I (cofactor-dependent), methyltransferase                 | 100   | 82    | 100 |
| MCB1EB_2206 | -                | Methionine synthase I, cobalamin-binding domain                                 | 100   | 75    | 99  |
| MCB1EB_2207 | -                | Carbonic anhydrase                                                              | 100   | -     | 98  |
| MCB1EB_2208 | BgramDRAFT_1585  | ABC-type dipeptide transport system, periplasmic component                      | 100   | 64    | 100 |
| MCB1EB_2209 | K788_4134        | Thiol-disulfide isomerase and thioredoxins                                      | 100   | 54    | 91  |
| MCB1EB_2210 | argS             | Cell division protein                                                           | 100   | 46    | 97  |
| MCB1EB_2211 | WQE_03647        | Arginyl-tRNA synthetase                                                         | 100   | 70    | 100 |
| MCB1EB_2212 | N234_15805       | Hypothetical protein                                                            | 100   | 59    | 100 |
| MCB1EB_2213 | -                | Transposase and inactivated derivatives                                         | -     | -     | -   |
| MCB1EB_2214 | Nit79A3_0051     | Hypothetical protein                                                            | 100   | 67    | 98  |
| MCB1EB_2215 | -                | Aspartokinases                                                                  | -     | -     | -   |
| MCB1EB_2216 | tccC3            | Transposase and inactivated derivatives, TnpA family                            | -     | -     | -   |
| MCB1EB_2217 | tccC3            | Rhs family protein                                                              | -     | -     | -   |
| MCB1EB_2218 | tccC3            | Rhs family protein                                                              | -     | -     | -   |
| MCB1EB_2219 | -                | Rhs family protein                                                              | -     | -     | -   |
| MCB1EB_2220 | PCH70_41490      | Hypothetical protein                                                            | -     | 46    | -   |
| MCB1EB_2221 | teaA2            | Glyceraldehyde-3-phosphate dehydrogenase/erythrose-4-phosphate dehydrogenase    | -     | -     | -   |
| MCB1EB_2222 | LYNGBM3L_24300   | Hypothetical protein                                                            | -     | 29    | -   |
| MCB1EB_2223 | -                | Predicted NTPase (NACHT family)                                                 | 66-91 | -     | -   |
| MCB1EB_2224 | PMI28_00004      | Growth inhibitor                                                                | -     | 34-37 | -   |
| MCB1EB_2225 | RPL7             | Growth regulator                                                                | -     | -     | -   |
| MCB1EB_2226 | -                | Small-conductance mechanosensitive channel                                      | -     | -     | -   |
| MCB1EB_2227 | Halhy_2265       | Transposase and inactivated derivatives, TnpA family                            | -     | -     | -   |
| MCB1EB_2228 | NH44784_027271   | Predicted NTPase (NACHT family)                                                 | 66-91 | -     | -   |
| MCB1EB_2229 | CRE_18979        | Spermidine/putrescine-binding periplasmic protein                               | -     | -     | -   |
| MCB1EB_2230 | L810_8411        | Undecaprenyl pyrophosphate synthase                                             | -     | -     | -   |
| MCB1EB_2231 | RSce2474         | Transcriptional regulator                                                       | 98    | 31    | 87  |
| MCB1EB_2232 | MGM0_44c00340    | Hypothetical protein                                                            | -     | -     | -   |
| MCB1EB_2233 | SKA53_10894      | Hypothetical protein                                                            | -     | -     | -   |
| MCB1EB_2234 | -                | Hypothetical protein                                                            | -     | -     | -   |
| MCB1EB_2235 | -                | Superfamily II helicase and inactivated derivatives                             | -     | -     | -   |
| MCB1EB_2236 | YO5_17850        | Predicted transcriptional regulator                                             | -     | -     | -   |
| MCB1EB_2237 | -                | Hypothetical protein                                                            | -     | -     | -   |
| MCB1EB_2238 | trnE             | Integrase                                                                       | -     | -     | -   |
| MCB1EB_2239 | phrB             | Predicted GTPase                                                                | 100   | 74    | 100 |
| MCB1EB_2240 | LEP1GSC044_1389  | Deoxyribodipyrimidine photolyase                                                | 100   | 38    | 96  |
| MCB1EB_2241 | -                | FOG: Ankyrin repeat                                                             | -     | -     | -   |
| MCB1EB_2242 | -                | Transposase and inactivated derivatives, IS5 family                             | -     | 82    | -   |
| MCB1EB_2243 | -                | FOG: Ankyrin repeat                                                             | -     | -     | -   |
| MCB1EB_2244 | -                | Transposase and inactivated derivatives, IS5 family                             | -     | 82    | -   |
| MCB1EB_2245 | -                | ADP-heptose synthase, bifunctional sugar kinase/adenylyltransferase             | 100   | 72    | 98  |
| MCB1EB_2246 | BC1001_0218      | Putative transcriptional regulator, homolog of Bvg accessory factor             | 100   | 51    | 96  |
| MCB1EB_2247 | dppB             | Biotin-(acetyl-CoA carboxylase) ligase                                          | 100   | 51    | 98  |
| MCB1EB_2248 | -                | ABC-type dipeptide/oligopeptide/nickel transport systems, permease components   | 100   | 77    | 100 |
| MCB1EB_2249 | -                | ABC-type dipeptide/oligopeptide/nickel transport systems, permease components   | 100   | 76    | 97  |
| MCB1EB_2250 | dppF             | ABC-type dipeptide/oligopeptide/nickel transport system, ATPase component       | 94    | 72    | 96  |
| MCB1EB_2251 | OR16_03807       | ABC-type oligopeptide transport system, ATPase component                        | 94    | 75    | 99  |
| MCB1EB_2252 | OR16_03807       | Spermidine/putrescine-binding periplasmic protein                               | 98    | -     | -   |
| MCB1EB_2253 | OR16_03807       | Spermidine/putrescine-binding periplasmic protein                               | 88    | -     | -   |
| MCB1EB_2254 | OR16_12515       | Spermidine/putrescine-binding periplasmic protein                               | 92-99 | -     | -   |



|             |                  |                                                                                                           |     |       |     |
|-------------|------------------|-----------------------------------------------------------------------------------------------------------|-----|-------|-----|
| MCB1EB_2255 | Bphy_5667        | Transcriptional regulator                                                                                 | 100 | 84    | 91  |
| MCB1EB_2256 | -                | Na <sup>+</sup> /citrate symporter                                                                        | -   | -     | -   |
| MCB1EB_2257 | -                | Beta-lactamase class D                                                                                    | -   | -     | -   |
| MCB1EB_2258 | -                | Predicted PP-loop superfamily ATPase                                                                      | 100 | 74    | 98  |
| MCB1EB_2259 | -                | Organic radical activating enzymes                                                                        | 100 | 73    | 99  |
| MCB1EB_2260 | mdrB             | 6-pyruvoyl-tetrahydropterin synthase                                                                      | 100 | 72    | 98  |
| MCB1EB_2261 | mrda             | Bacterial cell division membrane protein                                                                  | 100 | 73    | 98  |
| MCB1EB_2262 | mrdD             | Cell division protein FtsI/penicillin-binding protein 2                                                   | 100 | 74    | 97  |
| MCB1EB_2263 | mreC             | Cell shape-determining protein                                                                            | 100 | 75    | 100 |
| MCB1EB_2264 | -                | Cell shape-determining protein                                                                            | 100 | 66    | 80  |
| MCB1EB_2265 | gatC             | Actin-like ATPase involved in cell morphogenesis                                                          | 100 | -     | -   |
| MCB1EB_2266 | gatA             | Asp-tRNAAsn/Glu-tRNA Gln amidotransferase C subunit                                                       | 100 | 65    | 100 |
| MCB1EB_2267 | gatB             | Asp-tRNAAsn/Glu-tRNA Gln amidotransferase A subunit and related amidases                                  | 100 | 75    | 100 |
| MCB1EB_2268 | -                | Asp-tRNAAsn/Glu-tRNA Gln amidotransferase B subunit (PET112 homolog)                                      | 100 | 73    | 100 |
| MCB1EB_2269 | BCh11DRAFT_04361 | Exonuclease III                                                                                           | 100 | 76    | 100 |
| MCB1EB_2270 | -                | Zn-dependent protease with chaperone function                                                             | 100 | 38    | 93  |
| MCB1EB_2271 | metW             | Permeases of the major facilitator superfamily                                                            | 100 | 70    | 98  |
| MCB1EB_2272 | metX             | SAM-dependent methyltransferases                                                                          | 100 | 74    | 96  |
| MCB1EB_2273 | argB             | Homoserine acetyltransferase                                                                              | 100 | -     | -   |
| MCB1EB_2274 | hslU             | Acetylglutamate kinase                                                                                    | 100 | 74    | 100 |
| MCB1EB_2275 | clpQ             | ATP-dependent protease HslVU (ClpYQ), ATPase subunit                                                      | 99  | 77    | 100 |
| MCB1EB_2276 | dksA             | ATP-dependent protease HslVU (ClpYQ), peptidase subunit                                                   | 100 | 84    | 86  |
| MCB1EB_2277 | B1M_03060        | DnaK suppressor protein                                                                                   | 100 | 85    | 100 |
| MCB1EB_2278 | -                | Cytochrome c551/c552                                                                                      | 100 | -     | -   |
| MCB1EB_2279 | -                | Predicted periplasmic or secreted lipoprotein                                                             | 100 | 57    | 88  |
| MCB1EB_2280 | CAGGBEG34_180034 | Phosphoheptose isomerase                                                                                  | 100 | 52    | 100 |
| MCB1EB_2281 | -                | Predicted endonuclease distantly related to archaeal Holliday junction resolvase                          | 100 | -     | -   |
| MCB1EB_2282 | LLDT2_10835      | Predicted methyltransferases                                                                              | 100 | 65    | 100 |
| MCB1EB_2283 | CARN4_2025       | Putative glycosylglycerophosphate transferases involved in teichoic acid biosynthesis TagE/TagB/EpsJ/RodC | 93  | -     | -   |
| MCB1EB_2284 | -                | Protein containing a metal-binding domain shared with formylmethanofuran dehydrogenase subunit E          | 36  | -     | -   |
| MCB1EB_2285 | -                | Transposase and inactivated derivatives                                                                   | 100 | -     | 95  |
| MCB1EB_2286 | B3C1_06283       | Transposase and inactivated derivatives                                                                   | 100 | 82-84 | 100 |
| MCB1EB_2287 | Acifc_0758       | Phosphate uptake regulator                                                                                | -   | -     | -   |
| MCB1EB_2288 | Acifc_0757       | Hypothetical protein                                                                                      | -   | -     | -   |
| MCB1EB_2289 | -                | Hypothetical protein                                                                                      | -   | -     | -   |
| MCB1EB_2290 | lipA             | 18 : Unknown function                                                                                     | -   | -     | -   |
| MCB1EB_2291 | lipB             | Lipoate synthase                                                                                          | 100 | 86    | -   |
| MCB1EB_2292 | -                | Lipoate-protein ligase B                                                                                  | 99  | -     | -   |
| MCB1EB_2293 | -                | Uncharacterized conserved protein                                                                         | 100 | 54    | 100 |
| MCB1EB_2294 | -                | Branched-chain amino acid aminotransferase/4-amino-4-deoxychorismate lyase                                | 100 | -     | -   |
| MCB1EB_2295 | -                | D-alanyl-D-alanine carboxypeptidase                                                                       | 100 | 68    | 92  |
| MCB1EB_2296 | -                | Predicted hydrolase of the alpha/beta superfamily                                                         | 100 | 70    | 100 |
| MCB1EB_2297 | -                | Ferredoxin                                                                                                | -   | -     | -   |
| MCB1EB_2298 | -                | Response regulator containing CheY-like receiver, AAA-type ATPase, and DNA-binding domains                | -   | 69    | -   |
| MCB1EB_2299 | -                | Signal transduction histidine kinase involved in nitrogen fixation and metabolism regulation              | -   | 71    | -   |
| MCB1EB_2300 | -                | Hypothetical protein                                                                                      | 100 | 71    | 88  |
| MCB1EB_2301 | fnt              | tRNA and rRNA cytosine-C5-methylases                                                                      | 100 | 59    | 100 |
| MCB1EB_2302 | hnpX             | Methionyl-tRNA formyltransferase                                                                          | 100 | 67    | 100 |
| MCB1EB_2303 | C266_09527       | Zn-dependent protease with chaperone function                                                             | 100 | 81    | 99  |
| MCB1EB_2304 | def1             | 4-amino-4-deoxy-L-arabinose transferase and related glycosyltransferases of PMT family                    | 96  | 35    | 93  |
| MCB1EB_2305 | smf              | N-formylmethionyl-tRNA deformylase                                                                        | 100 | 77    | 99  |
| MCB1EB_2306 | -                | Predicted Rossmann fold nucleotide-binding protein involved in DNA uptake                                 | 100 | -     | -   |
| MCB1EB_2307 | topB             | Thiol-disulfide isomerase and thioredoxins                                                                | 100 | 59    | 96  |
| MCB1EB_2308 | -                | Topoisomerase IA                                                                                          | 100 | 82    | 100 |
| MCB1EB_2309 | -                | Site-specific recombinases, DNA invertase Pin homologs                                                    | -   | -     | -   |
| MCB1EB_2310 | leu20            | Uncharacterized conserved protein                                                                         | -   | -     | -   |
| MCB1EB_2311 | A176_03014       | Citrate lyase beta subunit                                                                                | -   | -     | -   |
| MCB1EB_2312 | X636_23345       | Citrate lyase beta subunit                                                                                | -   | -     | -   |
| MCB1EB_2313 | CAGGBEG34_190029 | Na <sup>+</sup> /citrate symporter                                                                        | 100 | -     | -   |
| MCB1EB_2314 | -                | Predicted transcriptional regulators                                                                      | -   | -     | -   |
| MCB1EB_2315 | dinJ             | Predicted transcriptional regulators                                                                      | 100 | -     | -   |
| MCB1EB_2316 | -                | DNA-damage-inducible protein J                                                                            | -   | -     | -   |
| MCB1EB_2317 | -                | Preprotein translocase subunit YidC                                                                       | 100 | 70    | 100 |

- Characterized protein
- Hypothetical protein
- Transposase and inactivated derivatives













**Supplemental Table S4.** Efflux pumps obtained from *M. cysteinexigens* B1-EB<sup>T</sup>, Mc-AG77, and *B. rhizoxinica* HKI 454<sup>T</sup> genomes.

| B1-EB <sup>T</sup> |                                                                     | Mc-AG77*                | HKI454 <sup>T</sup> |                                                                       |
|--------------------|---------------------------------------------------------------------|-------------------------|---------------------|-----------------------------------------------------------------------|
| Gene               | Annotation                                                          | Gene                    | Gene                | Annotation                                                            |
| -                  | Membrane-fusion protein                                             | ctg1_396                | RBRH_01297          | Acriflavin resistance periplasmic protein                             |
| -                  | Cation/multidrug efflux pump                                        | ctg1_395                | RBRH_01296          | Acriflavin resistance plasma membrane protein                         |
| -                  | Outer membrane protein                                              | ctg1_394                | RBRH_01295          | Type I secretion outer membrane protein                               |
| -                  | Uncharacterized lipoprotein                                         | ctg1_1413               | RBRH_03796          | Acriflavin resistance periplasmic protein                             |
| -                  | Membrane-fusion protein                                             | -                       | RBRH_03795          | Acriflavin resistance plasma membrane protein                         |
| -                  | Cation/multidrug efflux pump                                        | ctg1_1411,<br>ctg1_1412 | RBRH_03794          | Acriflavin resistance plasma membrane protein                         |
| -                  | ABC-type multidrug transport system, ATPase and permease components | ctg1_402                | RBRH_02428          | Multidrug resistance ABC transporter ATP-binding and permease protein |
| -                  | Predicted NTPase (NACHT family)                                     | ctg1_1945               | RBRH_03778          | Multidrug resistance ABC transporter ATP-binding and permease protein |
| -                  | Permeases of the major facilitator superfamily                      | ctg1_683                | RBRH_02122          | Transporter, MFS superfamily                                          |

\* Genes listed in Mc-AG77 are predicted from the homologous sequence of B1-EB<sup>T</sup> genome

**Supplemental Table S5. Comparison of the Sec pathway exported proteins from *M. cysteinexigens* B1-EB<sup>T</sup>, Mc-AG77, and *B. rhizoxinica* HKI 454<sup>T</sup> genomes.**

| Gene              | B1-EB <sup>T</sup>                                                                           | Mc-AG77*                     | HKI454 <sup>T</sup> |                                                                                                 |
|-------------------|----------------------------------------------------------------------------------------------|------------------------------|---------------------|-------------------------------------------------------------------------------------------------|
|                   | Annotation                                                                                   | Gene                         | Gene                | Annotation                                                                                      |
| -                 | Type IIA topoisomerase (DNA gyrase/topo II, topoisomerase IV), A subunit                     | ctg1_1372                    | RBRH_00055          | Outer membrane protein                                                                          |
| gph               | 2-polyphenyl-3-methyl-5-hydroxy-6-methoxy-1,4-benzoquinol methylase                          | ctg1_1370                    | RBRH_00057          | Phosphoglycolate phosphatase                                                                    |
| RPS107_mp1112     | 3-methyladenine DNA glycosylase                                                              | ctg1_17, ctg1_199, ctg1_2116 | RBRH_00100          | Hemagglutinin-like protein                                                                      |
| RSp1073           | Thymidylate kinase                                                                           | ctg1_17, ctg1_199, ctg1_2116 | RBRH_00100          | Hemagglutinin-like protein                                                                      |
| -                 | Uncharacterized conserved protein                                                            | ctg1_1306                    | RBRH_00169          | Transcriptional regulator, GntR family                                                          |
| -                 | Metal-dependent hydrolase                                                                    | ctg1_988                     | RBRH_00365          | Ferredoxin-NADP reductase                                                                       |
| RSc2452           | ABC-type dipeptide transport system, periplasmic component                                   | ctg1_772, ctg1_1149          | RBRH_00366          | Endonuclease                                                                                    |
| gspE              | Type II secretory pathway, ATPase PulE/Tfp pilus assembly pathway, ATPase PilB               | ctg1_810                     | RBRH_00781          | General secretion pathway protein E                                                             |
| gspD              | Type II secretory pathway, component PulD                                                    | ctg1_811                     | RBRH_00782          | General secretion pathway protein                                                               |
| -                 | ABC-type branched-chain amino acid transport systems, periplasmic component                  | ctg1_822                     | RBRH_00840          | Leucine-, isoleucine-, valine-, threonine-, and alanine-binding protein                         |
| -                 | FKBP-type peptidyl-prolyl cis-trans isomerases 2                                             | ctg1_1073                    | RBRH_00922          | DNA repair protein radC                                                                         |
| lpxC              | Uncharacterized conserved protein                                                            | -                            | RBRH_00949          | UDP-3-O-[3-hydroxymyristoyl] N-acetylglucosamine deacetylase                                    |
| -                 | Uncharacterized protein conserved in bacteria                                                | ctg1_1974                    | RBRH_00982          | Hypothetical exported protein                                                                   |
| -                 | Uncharacterized protein related to capsule biosynthesis enzymes                              | ctg1_1976                    | RBRH_00984          | Putative periplasmic protein                                                                    |
| argB              | Homoserine acetyltransferase                                                                 | ctg1_890                     | RBRH_00991          | Acetylglutamate kinase                                                                          |
| -                 | Zn-dependent protease with chaperone function                                                | ctg1_893                     | RBRH_00996          | AmpG protein                                                                                    |
| spoT              | Guanosine polyphosphate pyrophosphohydrolases/synthetases                                    | ctg1_442                     | RBRH_01008          | GTP pyrophosphokinase / Guanosine- 3',5'-bis(Diphosphate) 3'-pyrophosphohydrolase               |
| -                 | ABC-type phosphate transport system, permease component                                      | ctg1_1112                    | RBRH_01097          | Phosphate-binding protein                                                                       |
| folP              | Phosphomannomutase                                                                           | ctg1_1106                    | RBRH_01099          | Dihydropterolate synthase                                                                       |
| -                 | Signal transduction histidine kinase involved in nitrogen fixation and metabolism regulation | ctg1_870                     | RBRH_01265          | Hypothetical protein                                                                            |
| -                 | D-alanyl-D-alanine carboxypeptidase (penicillin-binding protein 4)                           | ctg1_1214                    | RBRH_01300          | Hypothetical protein                                                                            |
| BURMUCGD1_0587    | Uncharacterized protein conserved in bacteria                                                | ctg1_1216                    | RBRH_01305          | Esterase                                                                                        |
| purC              | Phosphoribosylaminoimidazole carboxylase (NCAIR synthetase)                                  | ctg1_1206                    | RBRH_01308          | Phosphoribosylaminoimidazole carboxylase carboxyltransferase subunit                            |
| -                 | Cytochrome c553                                                                              | ctg1_323                     | RBRH_01337          | Cytochrome c-554(548)                                                                           |
| -                 | Cytochrome c553                                                                              | ctg1_324                     | RBRH_01338          | Cytochrome c-554(548)                                                                           |
| pyrB              | Aspartate carbamoyltransferase, catalytic chain                                              | ctg1_414                     | RBRH_01477          | Aspartate carbamoyltransferase                                                                  |
| -                 | Outer membrane protein and related peptidoglycan-associated (lipo)proteins                   | ctg1_1342                    | RBRH_01525          | Tol system periplasmic component YbgF                                                           |
| tolB              | Hypothetical protein                                                                         | ctg1_1344                    | RBRH_01528          | TolB protein                                                                                    |
| glyA              | Predicted transcriptional regulator, consists of a Zn-ribbon and ATP-cone domains            | ctg1_1349                    | RBRH_01534          | Serine hydroxymethyltransferase                                                                 |
| CAGGBEG34_200100  | Uncharacterized protein conserved in bacteria                                                | ctg1_405                     | RBRH_01545          | Hypothetical exported protein                                                                   |
| -                 | Intracellular septation protein A                                                            | ctg1_1785                    | RBRH_01601          | Peptide methionine sulfoxide reductase msrB                                                     |
| miaA              | DNA mismatch repair enzyme (predicted ATPase)                                                | ctg1_998                     | RBRH_01633          | tRNA delta(2)-Isopenicillinylpyrophosphate transferase                                          |
| CAGGBEG34_290002  | Uncharacterized paraquat-inducible protein A                                                 | ctg1_1184                    | RBRH_01670          | Paraquat-inducible protein B                                                                    |
| -                 | ABC-type metal ion transport system, permease component                                      | ctg1_91                      | RBRH_01730          | ABC transporter substrate-binding protein                                                       |
| engC              | FOG: TPR repeat                                                                              | ctg1_78                      | RBRH_01746          | GTase                                                                                           |
| fumC              | Fumarase                                                                                     | ctg1_827                     | RBRH_01757          | Aldose 1-dehydrogenase                                                                          |
| -                 | Nucleotidyltransferase/DNA polymerase involved in DNA repair                                 | -                            | RBRH_01768          | Unnamed protein product                                                                         |
| -                 | Ribosomal protein L21                                                                        | ctg1_1257                    | RBRH_01990          | Cytochrome c4                                                                                   |
| gluJ              | ABC-type amino acid transport system, permease component                                     | ctg1_506                     | RBRH_02078          | Glutamate/aspartate transport system permease protein gluJ                                      |
| -                 | ABC-type amino acid transport/signal transduction systems, periplasmic component/domain      | ctg1_507                     | RBRH_02079          | Glutamate/aspartate-binding protein                                                             |
| gdhA              | Glutamate dehydrogenase/leucine dehydrogenase                                                | ctg1_508                     | RBRH_02080          | Glutamate dehydrogenase                                                                         |
| BC1002_0370       | Uncharacterized protein conserved in bacteria                                                | ctg1_136                     | RBRH_02101          | Hypothetical protein                                                                            |
| queF              | Enzyme related to GTP cyclohydrolase I                                                       | ctg1_142                     | RBRH_02109          | Queuosine biosynthesis protein QueF                                                             |
| -                 | FOG: TPR repeat                                                                              | ctg1_196                     | RBRH_02146          | Tetratricopeptide repeat family protein                                                         |
| prsA              | Phosphoribosylpyrophosphate synthetase                                                       | ctg1_193                     | RBRH_02149          | Ribose-phosphate pyrophosphokinase                                                              |
| prsA              | Phosphoribosylpyrophosphate synthetase                                                       | ctg1_193                     | RBRH_02149          | Ribose-phosphate pyrophosphokinase                                                              |
| -                 | ABC-type metal ion transport system, periplasmic component                                   | ctg1_91                      | RBRH_02176          | ABC transporter substrate-binding protein                                                       |
| -                 | Heme/copper-type cytochrome/quinol oxidase, subunit 3                                        | ctg1_1038                    | RBRH_02186          | Cytochrome c oxidase polypeptide I                                                              |
| coxB              | Heme/copper-type cytochrome/quinol oxidases, subunit I                                       | ctg1_1037                    | RBRH_02187          | Cytochrome c oxidase polypeptide II                                                             |
| -                 | Cytochrome cI                                                                                | ctg1_544                     | RBRH_02274          | Cytochrome cI                                                                                   |
| -                 | Trypsin-like serine proteases, typically periplasmic, contain C-terminal PDZ domain          | ctg1_548                     | RBRH_02279          | Endopeptidase degP                                                                              |
| BURK_006002       | ABC-type transport system involved in resistance to organic solvents, auxiliary component    | ctg1_567                     | RBRH_02300          | Toluene transport system Ttg2D protein                                                          |
| PMI06_006043      | Outer membrane protein W                                                                     | ctg1_2340                    | RBRH_02318          | Outer membrane protein                                                                          |
| BamMEX5DRAFT_2889 | Thiol:disulfide interchange protein                                                          | ctg1_591                     | RBRH_02340          | Thiol:disulfide interchange protein DsbD                                                        |
| Bcep18194_A3475   | Superfamily I DNA and RNA helicases                                                          | ctg1_2141                    | RBRH_02341          | Periplasmic divalent cation tolerance protein CutA                                              |
| trpD              | Anthranyl transferase                                                                        | ctg1_527                     | RBRH_02386          | Anthranyl transferase                                                                           |
| msbA              | Lipid A core - O-antigen ligase and related enzymes                                          | ctg1_2172                    | RBRH_02470          | Phospholipid-lipopolysaccharide ABC transporter                                                 |
| hemF              | Nicotinic acid mononucleotide adenyltransferase                                              | ctg1_2168                    | RBRH_02486          | Coproporphyrinogen III oxidase                                                                  |
| ilvB              | Acetolactate synthase, small (regulatory) subunit                                            | ctg1_1965                    | RBRH_02508          | Acetolactate synthase large subunit                                                             |
| rpsO              | Polyribonucleotide nucleotidyltransferase (polynucleotide phosphorylase)                     | ctg1_1435                    | RBRH_02518          | SSU ribosomal protein S15P                                                                      |
| -                 | Na <sup>+</sup> /H <sup>+</sup> antiporter NhaD and related arsenite permeases               | ctg1_479                     | RBRH_02593          | Hypothetical membrane spanning protein                                                          |
| -                 | Periplasmic serine proteases (ClpP class)                                                    | ctg1_309                     | RBRH_02608          | Signal peptide peptidase sppA                                                                   |
| -                 | Trypsin-like serine proteases, typically periplasmic, contain C-terminal PDZ domain          | ctg1_292                     | RBRH_02624          | Endopeptidase degP                                                                              |
| -                 | ABC-type dipeptide/oligopeptide/nickel transport systems, permease components                | ctg1_937                     | RBRH_02731          | Dipeptide transport system permease protein dppC                                                |
| -                 | ABC-type dipeptide/oligopeptide/nickel transport systems, permease components                | ctg1_936                     | RBRH_02732          | Dipeptide transport ATP-binding protein dppD                                                    |
| -                 | Hypothetical protein                                                                         | ctg1_35                      | RBRH_02803          | Potassium-transporting ATPase A chain                                                           |
| -                 | Uncharacterized protein conserved in bacteria                                                | ctg1_35                      | RBRH_02803          | Potassium-transporting ATPase A chain                                                           |
| -                 | Uncharacterized protein conserved in bacteria                                                | ctg1_35                      | RBRH_02803          | Potassium-transporting ATPase A chain                                                           |
| -                 | K <sup>+</sup> -transporting ATPase, A chain                                                 | -                            | RBRH_02840          | Outer membrane porin protein 32 precursor                                                       |
| -                 | ABC-type amino acid transport/signal transduction systems, periplasmic component/domain      | ctg1_700                     | RBRH_02850          | Histidine-binding protein                                                                       |
| -                 | Hypothetical protein                                                                         | ctg1_400                     | RBRH_02876          | 34 kDa membrane antigen precursor                                                               |
| -                 | Cell wall-associated hydrolases (invasion-associated proteins)                               | ctg1_1804                    | RBRH_02890          | Oligopeptide transport ATP-binding protein OppD/Oligopeptide transport ATP-binding protein OppF |
| -                 | ABC-type Fe <sup>3+</sup> transport system, periplasmic component                            | ctg1_1805                    | RBRH_02891          | NlpC/P60 family protein                                                                         |

|                 |                                                                                        |                      |            |                                                                            |
|-----------------|----------------------------------------------------------------------------------------|----------------------|------------|----------------------------------------------------------------------------|
| aroC            | Large exoproteins involved in heme utilization or adhesion                             | ctg1_1905            | RBRH_02955 | Chorismate synthase                                                        |
| BgramDRAFT_1585 | ABC-type dipeptide transport system, periplasmic component                             | ctg1_960             | RBRH_03115 | Thiol-disulfide interchange protein dsbA                                   |
| K788_4134       | Thiol-disulfide isomerase and thioredoxins                                             | ctg1_959             | RBRH_03116 | Cell division protein ftsN                                                 |
| K788_8069       | Aspartate 1-decarboxylase                                                              | ctg1_1923            | RBRH_03137 | Cobalamin-binding protein                                                  |
| -               | Uncharacterized protein conserved in bacteria                                          | ctg1_716             | RBRH_03189 | Surface protein                                                            |
| -               | Phosphatidylglycerophosphatase A and related proteins                                  | ctg1_720             | RBRH_03197 | Phosphatidylglycerophosphatase A                                           |
| mpl             | Exoribonuclease R                                                                      | ctg1_1296            | RBRH_03203 | UDP-N-acetylmuramate-L-alanyl-gamma-D-glutamyl-meso-diaminopimelate ligase |
| -               | Sugar kinases, ribokinase family                                                       | ctg1_1271            | RBRH_03214 | Outer membrane lipoprotein                                                 |
| nrdB            | Hypothetical protein                                                                   | ctg1_1269            | RBRH_03217 | Ribonucleoside-diphosphate reductase beta chain                            |
| RBRH_03270      | Ubiquinone biosynthesis protein COQ7                                                   | ctg1_1118            | RBRH_03270 | Outer membrane porin protein 32 precursor                                  |
| mviN            | Adenylate kinase and related kinases                                                   | ctg1_1016            | RBRH_03318 | Virulence factor mviN                                                      |
| h16_A0588       | Uncharacterized protein conserved in bacteria                                          | ctg1_1009            | RBRH_03325 | Hypothetical membrane spanning protein                                     |
| xerD            | Inorganic pyrophosphatase                                                              | ctg1_1006            | RBRH_03335 | Integrase/recombinase (XerD/RipX family)                                   |
| -               | Outer membrane protein/protective antigen OMA87                                        | ctg1_60              | RBRH_03566 | Outer membrane protein Omp                                                 |
| glnD            | NAD-dependent DNA ligase (contains BRCT domain type II)                                | ctg1_126             | RBRH_03580 | [protein-PII] uridylyltransferase                                          |
| arnT            | 4-amino-4-deoxy-L-arabinose transferase and related glycosyltransferases of PMT family | ctg1_461             | RBRH_03677 | Glucosyltransferase                                                        |
| BUPH_06600      | Transcriptional regulator                                                              | ctg1_1663            | RBRH_03701 | Unnamed protein product                                                    |
| purA            | ATP phosphoribosyltransferase involved in histidine biosynthesis                       | ctg1_174             | RBRH_03721 | Adenylosuccinate synthetase                                                |
| BH160DRAFT_6132 | Uncharacterized protein conserved in bacteria                                          | ctg1_181             | RBRH_03730 | Hypothetical protein                                                       |
| ispG            | Enzyme involved in the deoxyxylulose pathway of isoprenoid biosynthesis                | ctg1_183             | RBRH_03732 | 1-hydroxy-2-methyl-2-(E)-butenyl 4-diphosphate synthase                    |
| -               | Membrane proteins related to metalloendopeptidases                                     | ctg1_424             | RBRH_03742 | Peptidoglycan-specific endopeptidase, M23 family                           |
| -               | Cation/multidrug efflux pump                                                           | ctg1_1411, ctg1_1412 | RBRH_03794 | Acriflavin resistance plasma membrane protein                              |
| mdtB            | Membrane-fusion protein                                                                | -                    | RBRH_03795 | Acriflavin resistance plasma membrane protein                              |
| BY123_A017700   | ABC-type transport system, involved in lipoprotein release, permease component         | ctg1_1465            | RBRH_03837 | Regulatory protein                                                         |
| phrB            | Predicted GTPase                                                                       | ctg1_951             | RBRH_03918 | Deoxyribodipyrimidine photolyase                                           |
| ppiB            | FOG: TPR repeat                                                                        | ctg1_2008            | RBRH_03963 | Peptidyl-prolyl cis-trans isomerase                                        |
| -               | Predicted NTPase (NACHT family)                                                        | ctg1_2003            | RBRH_03966 | RRNA methylase, SpoU family                                                |
| mutS            | Uncharacterized conserved small protein                                                | ctg1_1873            | RBRH_03971 | DNA mismatch repair protein mutS                                           |

\* Genes listed in Mc-AG77 are predicted from the homologous sequence of B1-EB<sup>1</sup> genome

**Supplemental Table S6. Type III secretion system components derived from *M. cysteinexigens* B1-EB<sup>T</sup>, Mc-AG77, and *B. rhizoxinica* HKI 454<sup>T</sup> genomes.**

| B1-EB <sup>T</sup> |                                                                                        | Mc-AG77*                     | HKI454 <sup>T</sup> |                                                                                                 |
|--------------------|----------------------------------------------------------------------------------------|------------------------------|---------------------|-------------------------------------------------------------------------------------------------|
| Gene               | Annotation                                                                             | Gene                         | Gene                | Annotation                                                                                      |
| -                  | Cell wall-associated hydrolases (invasion-associated proteins)                         | ctg1_1804                    | RBRH_02890          | Oligopeptide transport ATP-binding protein OppD/Oligopeptide transport ATP-binding protein OppF |
| -                  | Uncharacterized conserved protein                                                      | ctg1_1306                    | RBRH_00169          | Transcriptional regulator, GntR family                                                          |
| glmD               | NAD-dependent DNA ligase (contains BRCT domain type II)                                | ctg1_1306                    | RBRH_03580          | [protein-PII] uridylyltransferase                                                               |
| -                  | Gamma-aminobutyrate permease and related permeases                                     | ctg1_1172                    | RBRH_00422          | Lysine 2,3-aminomutase                                                                          |
| -                  | Predicted NTPase (NACHT family)                                                        | ctg1_2003                    | RBRH_03966          | RRNA methylase, SpoU family                                                                     |
| gspE               | Type II secretory pathway, ATPase PulE/Tfp pilus assembly pathway, ATPase PilB         | ctg1_810                     | RBRH_00781          | General secretion pathway protein E                                                             |
| purA               | ATP phosphoribosyltransferase involved in histidine biosynthesis                       | ctg1_174                     | RBRH_03721          | Adenylosuccinate synthetase                                                                     |
| arnT               | 4-amino-4-deoxy-L-arabinose transferase and related glycosyltransferases of PMT family | ctg1_461                     | RBRH_03677          | Glucosyltransferase                                                                             |
| fumC               | Fumarase                                                                               | ctg1_827                     | RBRH_01757          | Fumarate hydratase                                                                              |
| -                  | Uncharacterized protein conserved in bacteria                                          | ctg1_716                     | RBRH_03189          | surface protein                                                                                 |
| BC1002_0370        | Uncharacterized protein conserved in bacteria                                          | ctg1_136                     | RBRH_02101          | Hypothetical protein                                                                            |
| -                  | Nucleotidyltransferase/DNA polymerase involved in DNA repair                           | -                            | RBRH_01356          | DNA polymerase III alpha subunit                                                                |
| miaA               | DNA mismatch repair enzyme (predicted ATPase)                                          | ctg1_998                     | RBRH_01633          | tRNA delta(2)-Isopentenylpyrophosphate transferase                                              |
| aroC               | Large exoproteins involved in heme utilization or adhesion                             | ctg1_1905                    | RBRH_02955          | Chorismate synthase                                                                             |
| xerD               | Inorganic pyrophosphatase                                                              | ctg1_1006                    | RBRH_03335          | Integrase/recombinase (XerD/RipX family)                                                        |
| -                  | K <sup>+</sup> -transporting ATPase, A chain                                           | ctg1_34                      | RBRH_02804          | Potassium-transporting ATPase B chain                                                           |
| gdhA               | Glutamate dehydrogenase/leucine dehydrogenase                                          | ctg1_508                     | RBRH_02080          | Glutamate dehydrogenase                                                                         |
| gph                | 2-polyprenyl-3-methyl-5-hydroxy-6-methoxy-1,4-benzoquinol methylase                    | ctg1_147                     | RBRH_00057          | type III secretion inner membrane protein SctR                                                  |
| queF               | Enzyme related to GTP cyclohydrolase I                                                 | ctg1_142                     | RBRH_02109          | Queuosine biosynthesis protein QueF                                                             |
| ilvB               | Acetolactate synthase, small (regulatory) subunit                                      | ctg1_1965                    | RBRH_02508          | Acetolactate synthase large subunit                                                             |
| -                  | FKBP-type peptidyl-prolyl cis-trans isomerases 2                                       | ctg1_1073                    | RBRH_00922          | DNA repair protein radC                                                                         |
| -                  | Metal-dependent hydrolase                                                              | ctg1_988                     | RBRH_00365          | Ferredoxin--NADP reductase                                                                      |
| folP               | Phosphomannomutase                                                                     | ctg1_1106                    | RBRH_01099          | Dihydropteroate synthase                                                                        |
| -                  | Zn-dependent protease with chaperone function                                          | ctg1_893                     | RBRH_00996          | AmpG protein                                                                                    |
| -                  | ABC-type dipeptide/oligopeptide/nickel transport systems, permease components          | ctg1_936                     | RBRH_02732          | Dipeptide transport ATP-binding protein dppD                                                    |
| hemF               | Nicotinic acid mononucleotide adenylyltransferase                                      | ctg1_2168                    | RBRH_02486          | Coproporphyrinogen III oxidase                                                                  |
| ppiB               | FOG: TPR repeat                                                                        | ctg1_2008                    | RBRH_03963          | Peptidyl-prolyl cis-trans isomerase                                                             |
| -                  | Phosphatidylglycerophosphatase A and related phosphatases                              | ctg1_720                     | RBRH_03197          | Phosphatidylglycerophosphatase A                                                                |
| pyrB               | Aspartate carbamoyltransferase, catalytic chain                                        | ctg1_414                     | RBRH_01477          | Aspartate carbamoyltransferase                                                                  |
| -                  | Periplasmic serine proteases (ClpP class)                                              | ctg1_309                     | RBRH_02608          | Signal peptide peptidase sppA                                                                   |
| msbA               | Lipid A core - O-antigen ligase and related enzymes                                    | ctg1_2172                    | RBRH_02470          | Phospholipid-lipopolysaccharide ABC transporter                                                 |
| argB               | Homoserine acetyltransferase                                                           | ctg1_890                     | RBRH_00991          | Acetylglutamate kinase                                                                          |
| -                  | Membrane proteins related to metalloendopeptidases                                     | ctg1_424                     | RBRH_03742          | Peptidoglycan-specific endopeptidase, M23 family                                                |
| trpD               | Anthranilate phosphoribosyltransferase                                                 | ctg1_527                     | RBRH_02386          | Anthranilate phosphoribosyltransferase                                                          |
| mutS               | Uncharacterized conserved small protein                                                | ctg1_1873                    | RBRH_03971          | DNA mismatch repair protein mutS                                                                |
| phrB               | Predicted GTPase                                                                       | ctg1_951                     | RBRH_03918          | Deoxyribodipyrimidine photolyase                                                                |
| ispG               | Enzyme involved in the deoxyxylulose pathway of isoprenoid biosynthesis                | ctg1_183                     | RBRH_03732          | 1-hydroxy-2-methyl-2-(E)-butenyl 4-diphosphate synthase                                         |
| glJ                | ABC-type amino acid transport system, permease component                               | ctg1_506                     | RBRH_02078          | Glutamate/aspartate transport system permease protein glJ                                       |
| dxs                | Geranylgeranyl pyrophosphate synthase                                                  | ctg1_2092                    | RBRH_03430          | 1-Deoxy-D-xylulose 5-phosphate synthase                                                         |
| BURMUCGD1_0587     | Uncharacterized protein conserved in bacteria                                          | ctg1_1216                    | RBRH_01305          | Esterase                                                                                        |
| sms                | Alanine racemase                                                                       | ctg1_2152                    | RBRH_00325          | DNA repair protein RadaA                                                                        |
| BH160DRAFT_6132    | Uncharacterized protein conserved in bacteria                                          | ctg1_181                     | RBRH_03730          | Hypothetical protein                                                                            |
| engC               | FOG: TPR repeat                                                                        | ctg1_78                      | RBRH_01746          | GTPase                                                                                          |
| -                  | ABC-type dipeptide/oligopeptide/nickel transport systems, permease components          | ctg1_937                     | RBRH_02731          | Dipeptide transport system permease protein dppC                                                |
| prsA               | Phosphoribosylpyrophosphate synthetase                                                 | ctg1_193                     | RBRH_02149          | Ribose-phosphate pyrophosphokinase                                                              |
| RPS107_mp1112      | 3-methyladenine DNA glycosylase                                                        | ctg1_17, ctg1_199, ctg1_2116 | RBRH_00100          | Hemagglutinin-like protein                                                                      |
| CAGGBEG34_290002   | Uncharacterized paraquat-inducible protein A                                           | ctg1_1184                    | RBRH_01670          | Paraquat-inducible protein B                                                                    |
| rpsO               | Polyribonucleotide nucleotidyltransferase (polynucleotide phosphorylase)               | ctg1_1435                    | RBRH_02518          | SSU ribosomal protein S15P                                                                      |
| ndrB               | Hypothetical protein                                                                   | ctg1_1269                    | RBRH_03217          | Ribonucleoside-diphosphate reductase beta chain                                                 |
| -                  | Intracellular septation protein A                                                      | ctg1_1785                    | RBRH_01601          | Peptide methionine sulfoxide reductase msrB                                                     |
| purC               | Phosphoribosylaminoimidazole carboxylase (NCAIR synthetase)                            | ctg1_1206                    | RBRH_01308          | Phosphoribosylaminoimidazole carboxylase carboxyltransferase subunit                            |
| -                  | rieme/copper-type cytochrome/quinor oxidase, subunit 2                                 | ctg1_1038                    | RBRH_02186          | Cytochrome c oxidase polypeptide I                                                              |
| glyA               | Predicted transcriptional regulator, consists of a Zn-ribbon and ATP-cone domains      | ctg1_1349                    | RBRH_01534          | Serine hydroxymethyltransferase                                                                 |
| RSp1073            | Thymidylate kinase                                                                     | ctg1_17, ctg1_199, ctg1_2116 | RBRH_00100          | Hemagglutinin-like protein                                                                      |

\* Genes listed in Mc-AG77 are predicted from the homologous sequence of B1-EB<sup>T</sup> genome



**Supplemental Table S7.** Comparison of metabolic potentials, nutrients uptake and defense responses in B1-EB<sup>T</sup>, Mc-AG77 and HKI 454<sup>T</sup>.

| Attributes                                                                                               | B1-EB <sup>T</sup>                                                                                                                                                                                                                                                                                                                                            | Mc-AG77                                                                                                                                                                                                                                                                                                                                                                                             | HKI454 <sup>T</sup>                                                                                                                                                                                                                                                                                                                                                                                                      |
|----------------------------------------------------------------------------------------------------------|---------------------------------------------------------------------------------------------------------------------------------------------------------------------------------------------------------------------------------------------------------------------------------------------------------------------------------------------------------------|-----------------------------------------------------------------------------------------------------------------------------------------------------------------------------------------------------------------------------------------------------------------------------------------------------------------------------------------------------------------------------------------------------|--------------------------------------------------------------------------------------------------------------------------------------------------------------------------------------------------------------------------------------------------------------------------------------------------------------------------------------------------------------------------------------------------------------------------|
| <b>Primary metabolism</b>                                                                                |                                                                                                                                                                                                                                                                                                                                                               |                                                                                                                                                                                                                                                                                                                                                                                                     |                                                                                                                                                                                                                                                                                                                                                                                                                          |
| Gluconeogenesis                                                                                          | -                                                                                                                                                                                                                                                                                                                                                             | -                                                                                                                                                                                                                                                                                                                                                                                                   | RBRH_00086, RBRH_01311, RBRH_01407, RBRH_03119                                                                                                                                                                                                                                                                                                                                                                           |
| Ethanol assimilation                                                                                     | -                                                                                                                                                                                                                                                                                                                                                             | -                                                                                                                                                                                                                                                                                                                                                                                                   | RBRH_01957, RBRH_02691, RBRH_03108, RBRH_03107, RBRH_00946, RBRH_00316, RBRH_00393                                                                                                                                                                                                                                                                                                                                       |
| Import of organic acids                                                                                  | -                                                                                                                                                                                                                                                                                                                                                             | -                                                                                                                                                                                                                                                                                                                                                                                                   | RBRH_00074, RBRH_00570, RBRH_00171, RBRH_00170, RBRH_02513, RBRH_01475, RBRH_02105, RBRH_00014, RBRH_02435, RBRH_03529, RBRH_00215                                                                                                                                                                                                                                                                                       |
| Dipeptide and oligopeptide import system                                                                 | MCB1EB_2025, MCB1EB_2209, MCB1EB_2249, MCB1EB_2250, MCB1EB_2251, MCB1EB_1684, MCB1EB_1241                                                                                                                                                                                                                                                                     | ctg1_1149, ctg1_960, ctg1_937, ctg1_936, ctg1_935, ctg1_1449, ctg1_1800                                                                                                                                                                                                                                                                                                                             | RBRH_03113, RBRH_02733, RBRH_02732, RBRH_02731, RBRH_02730, RBRH_02729, RBRH_02888, RBRH_02889, RBRH_02890, RBRH_02887                                                                                                                                                                                                                                                                                                   |
| <b>Cofactor biosynthesis</b>                                                                             |                                                                                                                                                                                                                                                                                                                                                               |                                                                                                                                                                                                                                                                                                                                                                                                     |                                                                                                                                                                                                                                                                                                                                                                                                                          |
| Biosynthesis of pyridoxin, heme, flavin, biotin and thiamine                                             | MCB1EB_152, MCB1EB_467, MCB1EB_519, MCB1EB_565, MCB1EB_654, MCB1EB_719, MCB1EB_1949, MCB1EB_949, MCB1EB_112, MCB1EB_1169, MCB1EB_1172, MCB1EB_1922, MCB1EB_2131, MCB1EB_2132, MCB1EB_2133, MCB1EB_1169, MCB1EB_149, MCB1EB_151, MCB1EB_48, MCB1EB_1901, MCB1EB_1902, MCB1EB_2248, MCB1EB_993, MCB1EB_995, MCB1EB_1115, MCB1EB_1357, MCB1EB_1394, MCB1EB_2142, | ctg1_705, ctg1_467, ctg1_415, ctg1_375, ctg1_278, ctg1_197, ctg1_2155, ctg1_1242, ctg1_1229, ctg1_981, ctg1_951, ctg1_729, ctg1_17, ctg1_199, ctg1_2116, ctg1_1954, ctg1_1953, ctg1_1256, ctg1_1039, ctg1_1038, ctg1_1037, ctg1_2098, ctg1_2096, ctg1_1965, ctg1_1706, ctg1_1668, ctg1_1027, ctg1_708, ctg1_706, ctg1_1825, ctg1_818, ctg1_817, ctg1_1276, ctg1_1275, ctg1_1264, ctg1_982, ctg1_939 | RBRH_02443, RBRH_01081, RBRH_02335, RBRH_02334, RBRH_02178, RBRH_02179, RBRH_00935, RBRH_03796, RBRH_03795, RBRH_03794, RBRH_01414, RBRH_01296, RBRH_01297, RBRH_03209, RBRH_03208, RBRH_02661, RBRH_03392, RBRH_04087, RBRH_02226, RBRH_03100, RBRH_03099, RBRH_03196, pBRH01- RBRH_03434, RBRH_02982, RBRH_02981, RBRH_02980, RBRH_00528, RBRH_02772, RBRH_03038                                                       |
| <b>Membrane transport</b>                                                                                |                                                                                                                                                                                                                                                                                                                                                               |                                                                                                                                                                                                                                                                                                                                                                                                     |                                                                                                                                                                                                                                                                                                                                                                                                                          |
| Putative cobalamin transport system                                                                      | MCB1EB_1332, MCB1EB_1334, MCB1EB_2205                                                                                                                                                                                                                                                                                                                         | ctg1_1734, ctg1_1732, ctg1_964                                                                                                                                                                                                                                                                                                                                                                      | RBRH_01656, RBRH_03137, RBRH_01135, RBRH_01971,                                                                                                                                                                                                                                                                                                                                                                          |
| Fe <sup>2+</sup> , Mg <sup>2+</sup> , Co <sup>2+</sup> , Zn <sup>2+</sup> , K <sup>+</sup> uptake system | MCB1EB_271, MCB1EB_1926, MCB1EB_216, MCB1EB_351, MCB1EB_1926, MCB1EB_541, MCB1EB_543, MCB1EB_761, MCB1EB_2006, MCB1EB_550, MCB1EB_2006, MCB1EB_743, MCB1EB_891, MCB1EB_892, MCB1EB_893, MCB1EB_895, MCB1EB_1641, MCB1EB_1953,                                                                                                                                 | ctg1_581, ctg1_1251, ctg1_642, ctg1_523, ctg1_1251, ctg1_398, ctg1_400, ctg1_149, ctg1_1164, ctg1_390, ctg1_1164, ctg1_173, ctg1_35, ctg1_34, ctg1_33, ctg1_31, ctg1_1834, ctg1_1225                                                                                                                                                                                                                | RBRH_03162, RBRH_02008, RBRH_02210, RBRH_03237, RBRH_02878, RBRH_02719, RBRH_01747, RBRH_02688, RBRH_01133, RBRH_01325, RBRH_02015, RBRH_03110, RBRH_03075, RBRH_03050, RBRH_03420, RBRH_00997, RBRH_00785, RBRH_03719, RBRH_02130, pBRH01- RBRH_00461, RBRH_02819, RBRH_02805, RBRH_02804, RBRH_02803                                                                                                                   |
| Na <sup>+</sup> /Ca <sup>2+</sup> antiporter                                                             | MCB1EB_455, MCB1EB_1707,                                                                                                                                                                                                                                                                                                                                      | ctg1_479, ctg1_1426                                                                                                                                                                                                                                                                                                                                                                                 | RBRH_00006, RBRH_00005, RBRH_02842, RBRH_01432                                                                                                                                                                                                                                                                                                                                                                           |
| Na <sup>+</sup> /citrate symporter                                                                       | MCB1EB_449, MCB1EB_476, MCB1EB_921, MCB1EB_981, MCB1EB_1145, MCB1EB_1275, MCB1EB_1417, MCB1EB_1529, MCB1EB_1583, MCB1EB_1878, MCB1EB_2020, MCB1EB_2313                                                                                                                                                                                                        | ctg1_1584, ctg1_1647, ctg1_1817, ctg1_457, ctg1_930, ctg1_1933, ctg1_8, ctg1_1300, ctg1_2108, ctg1_858                                                                                                                                                                                                                                                                                              | RBRH_03087, RBRH_01674, RBRH_00074, pBRH01- RBRH_00570                                                                                                                                                                                                                                                                                                                                                                   |
| NRPS/PKS system for rhizoxin biosynthesis                                                                | -                                                                                                                                                                                                                                                                                                                                                             | -                                                                                                                                                                                                                                                                                                                                                                                                   | RBRH_02642, RBRH_04173, RBRH_02641, RBRH_03984, RBRH_04313, RBRH_03867, RBRH_01506, RBRH_04125, RBRH_00209, RBRH_04061, rhiE, rhiD, rhiC, rhiB, rhiA, pBRH01- RBRH_04314, RBRH_02787, RBRH_04279, RBRH_01504, RBRH_00423, RBRH_00429, RBRH_04227, RBRH_00452, RBRH_00484, RBRH_00572, RBRH_00578, RBRH_00622, RBRH_04248, RBRH_00623, RBRH_00274, RBRH_00260, RBRH_00213, RBRH_01792, RBRH_04314, RBRH_02787, RBRH_04279 |
| Lantibiotic biosynthesis                                                                                 | -                                                                                                                                                                                                                                                                                                                                                             | -                                                                                                                                                                                                                                                                                                                                                                                                   | pBRH01- RBRH_00226                                                                                                                                                                                                                                                                                                                                                                                                       |
| Chitinolytic enzymes and chitin-binding proteins                                                         | -                                                                                                                                                                                                                                                                                                                                                             | -                                                                                                                                                                                                                                                                                                                                                                                                   | RBRH_01547, RBRH_02666                                                                                                                                                                                                                                                                                                                                                                                                   |
| <b>Amino acid metabolism</b>                                                                             |                                                                                                                                                                                                                                                                                                                                                               |                                                                                                                                                                                                                                                                                                                                                                                                     |                                                                                                                                                                                                                                                                                                                                                                                                                          |
| Branched-chain amino acid                                                                                | MCB1EB_30, MCB1EB_44, MCB1EB_1194, MCB1EB_1971, MCB1EB_2090, MCB1EB_2091, MCB1EB_2092, MCB1EB_2093, MCB1EB_2178, MCB1EB_2294                                                                                                                                                                                                                                  | ctg1_822, ctg1_837, ctg1_1876, ctg1_1202, ctg1_1079, ctg1_1078, ctg1_1077, ctg1_1076, ctg1_991, ctg1_876                                                                                                                                                                                                                                                                                            | RBRH_00809, RBRH_00810, RBRH_04065, RBRH_00813, RBRH_00915, RBRH_00914, RBRH_00913, RBRH_00912, RBRH_01064, RBRH_01063, RBRH_01062, RBRH_02655, RBRH_02654, RBRH_02653, RBRH_02652, RBRH_01316, RBRH_01317, RBRH_01318, pBRH01-RBRH_00502, RBRH_00503                                                                                                                                                                    |
| Aromatic amino acid                                                                                      | MCB1EB_291, MCB1EB_474, MCB1EB_487, MCB1EB_1007, MCB1EB_1038                                                                                                                                                                                                                                                                                                  | ctg1_560, ctg1_459, ctg1_447, ctg1_2084, ctg1_2047                                                                                                                                                                                                                                                                                                                                                  | RBRH_02874, pBRH01-RBRH_00490, RBRH_00491                                                                                                                                                                                                                                                                                                                                                                                |
| Histidine                                                                                                | MCB1EB_154, MCB1EB_155, MCB1EB_607, MCB1EB_741, MCB1EB_815, MCB1EB_895, MCB1EB_1032, MCB1EB_1188, MCB1EB_1387                                                                                                                                                                                                                                                 | ctg1_703, ctg1_702, ctg1_330, ctg1_175, ctg1_99, ctg1_31, ctg1_2053, ctg1_1887, ctg1_1676                                                                                                                                                                                                                                                                                                           | RBRH_03722, RBRH_03800, RBRH_01405, RBRH_04111, RBRH_01406, RBRH_01301, RBRH_00797, RBRH_02293, RBRH_02292, RBRH_02850, RBRH_02858, RBRH_03731, pBRH01- RBRH_02789, RBRH_00406                                                                                                                                                                                                                                           |
| Glutamate/ aspartate                                                                                     | MCB1EB_91, MCB1EB_153, MCB1EB_165, MCB1EB_207, MCB1EB_367, MCB1EB_1216, MCB1EB_1857, MCB1EB_1916, MCB1EB_2044, MCB1EB_2274, MCB1EB_360, MCB1EB_474, MCB1EB_487, MCB1EB_507, MCB1EB_520, MCB1EB_849, MCB1EB_91, MCB1EB_1038, MCB1EB_1070, MCB1EB_1155, MCB1EB_1776, MCB1EB_1863, MCB1EB_2099                                                                   | ctg1_748, ctg1_704, ctg1_692, ctg1_651, ctg1_508, ctg1_1854, ctg1_1322, ctg1_1261, ctg1_1129, ctg1_890, ctg1_515, ctg1_459, ctg1_447, ctg1_425, ctg1_414, ctg1_69, ctg1_2047, ctg1_2016, ctg1_1924, ctg1_1362, ctg1_1316, ctg1_1070                                                                                                                                                                 | RBRH_03931, RBRH_00189, RBRH_01412, RBRH_02075, RBRH_02077, RBRH_02078, RBRH_02079, RBRH_02080, RBRH_00991, RBRH_00010, RBRH_00003, RBRH_03261, RBRH_03258, RBRH_03246, RBRH_03230, RBRH_01650, RBRH_02313, RBRH_02312,                                                                                                                                                                                                  |

|                                                         |                                                                                                                                |                                                                                                              |                                                                                                                                                                                       |
|---------------------------------------------------------|--------------------------------------------------------------------------------------------------------------------------------|--------------------------------------------------------------------------------------------------------------|---------------------------------------------------------------------------------------------------------------------------------------------------------------------------------------|
| Glycine                                                 | MCB1EB_934, MCB1EB_996, MCB1EB_1251, MCB1EB_1258, MCB1EB_1680, MCB1EB_1789, MCB1EB_1948, MCB1EB_1949, MCB1EB_1950, MCB1EB_2027 | ctg1_2176, ctg1_2095, ctg1_1784, ctg1_1782, ctg1_1453, ctg1_1349, ctg1_1229, ctg1_1228, ctg1_1227, ctg1_1146 | RBRH_00844, RBRH_00845, RBRH_02308, RBRH_02487, <b>pBRH01</b> -RBRH_02814, RBRH_02813, RBRH_02811, RBRH_03481                                                                         |
| Citrate                                                 | MCB1EB_1110, MCB1EB_1864, MCB1EB_1865, MCB1EB_2144, MCB1EB_2313                                                                | ctg1_1970, ctg1_1314, ctg1_1315, ctg1_1025, ctg1_858                                                         | RBRH_03108, RBRH_03107, RBRH_01674, RBRH_00946, RBRH_00074, RBRH_00175, RBRH_00164, <b>pBRH01</b> -RBRH_00392, RBRH_00393, RBRH_00570, RBRH_00316, RBRH_00306, RBRH_02824,            |
| Efflux systems for Arg, His, Lys                        | MCB1EB_458, MCB1EB_546, MCB1EB_1195, MCB1EB_1721, MCB1EB_1722                                                                  | ctg1_476, ctg1_395, ctg1_1875, ctg1_1411, ctg1_1412                                                          | RBRH_03883, RBRH_02157, RBRH_03122, RBRH_00102, RBRH_02499, <b>pBRH01</b> -RBRH_04222, RBRH_00422, RBRH_03457                                                                         |
| Efflux systems for cysteine                             | -                                                                                                                              | -                                                                                                            | RBRH_03826, RBRH_02205, RBRH_02239, RBRH_01971, RBRH_00010, RBRH_00003, RBRH_00938, RBRH_01725, RBRH_01073, <b>pBRH01</b> -RBRH_03440, RBRH_02988                                     |
| <b>Polar lipids</b>                                     |                                                                                                                                |                                                                                                              |                                                                                                                                                                                       |
| Phosphatidylethanolamine                                | MCB1EB_470, MCB1EB_1043, MCB1EB_1111, MCB1EB_1112, MCB1EB_2025                                                                 | ctg1_463, ctg1_2042, ctg1_1969, ctg1_1968, ctg1_1149                                                         | -                                                                                                                                                                                     |
| Phosphatidylglycerol                                    | MCB1EB_470, MCB1EB_662, MCB1EB_1043, MCB1EB_2025                                                                               | ctg1_463, ctg1_271, ctg1_2042, ctg1_1149                                                                     | -                                                                                                                                                                                     |
| Aminophospholipid                                       | MCB1EB_635, MCB1EB_1957                                                                                                        | ctg1_300, ctg1_1216                                                                                          | -                                                                                                                                                                                     |
| <b>Fatty acid synthesis</b>                             |                                                                                                                                |                                                                                                              |                                                                                                                                                                                       |
| Acetyl-CoA carboxylase components                       | MCB1EB_1077, MCB1EB_1858, MCB1EB_2247                                                                                          | ctg1_2012, ctg1_1321, ctg1_939                                                                               | RBRH_03208                                                                                                                                                                            |
| Peripheral enzymes (ACP synthase and Biotin ligase)     | MCB1EB_655, MCB1EB_2247                                                                                                        | ctg1_277, ctg1_939                                                                                           | <b>pBRH01</b> -RBRH_02776                                                                                                                                                             |
| Glycerophospholipid metabolism                          | MCB1EB_1970, MCB1EB_2140, MCB1EB_2191, MCB1EB_1090,                                                                            | ctg1_1158, ctg1_1029, ctg1_978, ctg1_1992                                                                    | RBRH_01314, RBRH_02197, RBRH_01278, RBRH_02322, <b>pBRH01</b> -RBRH_03529                                                                                                             |
| <b>Lipopolysaccharide gene cluster (LPSs)</b>           |                                                                                                                                |                                                                                                              |                                                                                                                                                                                       |
| Lipopolysaccharide (LPS)                                | -                                                                                                                              | -                                                                                                            | RBRH_02470, waaC, RBRH_01946, <b>pBRH01</b> -RBRH_00221                                                                                                                               |
| O-antigen                                               | -                                                                                                                              | -                                                                                                            | waaL, RBRH_01327,                                                                                                                                                                     |
| Inner membrane ABC transporter, MsbA                    | MCB1EB_929                                                                                                                     | ctg1_2172                                                                                                    | -                                                                                                                                                                                     |
| Transport complex (LptA, LptAB, LptC, LptD, LptE, LptG) | -                                                                                                                              | -                                                                                                            | RBRH_01445, RBRH_00521, RBRH_03824,                                                                                                                                                   |
| <b>Expo/ capsular polysaccharide (EPS) biosynthesis</b> |                                                                                                                                |                                                                                                              |                                                                                                                                                                                       |
| Antigen flippase and polymerase                         | -                                                                                                                              | -                                                                                                            | RBRH_03897, wzx                                                                                                                                                                       |
| Trans-envelope transport complex (Wza/Wzb/Wzc)          | -                                                                                                                              | -                                                                                                            | RBRH_00520, RBRH_00521, RBRH_00522                                                                                                                                                    |
| Glycosyltransferase gene                                | MCB1EB_466, MCB1EB_472, MCB1EB_540, MCB1EB_926, MCB1EB_927, MCB1EB_1270, MCB1EB_1781, MCB1EB_2100, MCB1EB_2105, MCB1EB_2304    | ctg1_468, ctg1_461, ctg1_401, ctg1_2175, ctg1_2174, ctg1_1772, ctg1_1357, ctg1_1069, ctg1_1064, ctg1_866     | wbxA, wbiF, RBRH_01468, RBRH_03053, RBRH_02249, RBRH_00363, RBRH_01942, RBRH_02426, RBRH_01558, RBRH_01575, RBRH_03887, RBRH_03896, <b>pBRH01</b> -RBRH_02977, RBRH_00433, RBRH_00435 |

**Fig. S1A-1**  
**Sharmin, D., et al**

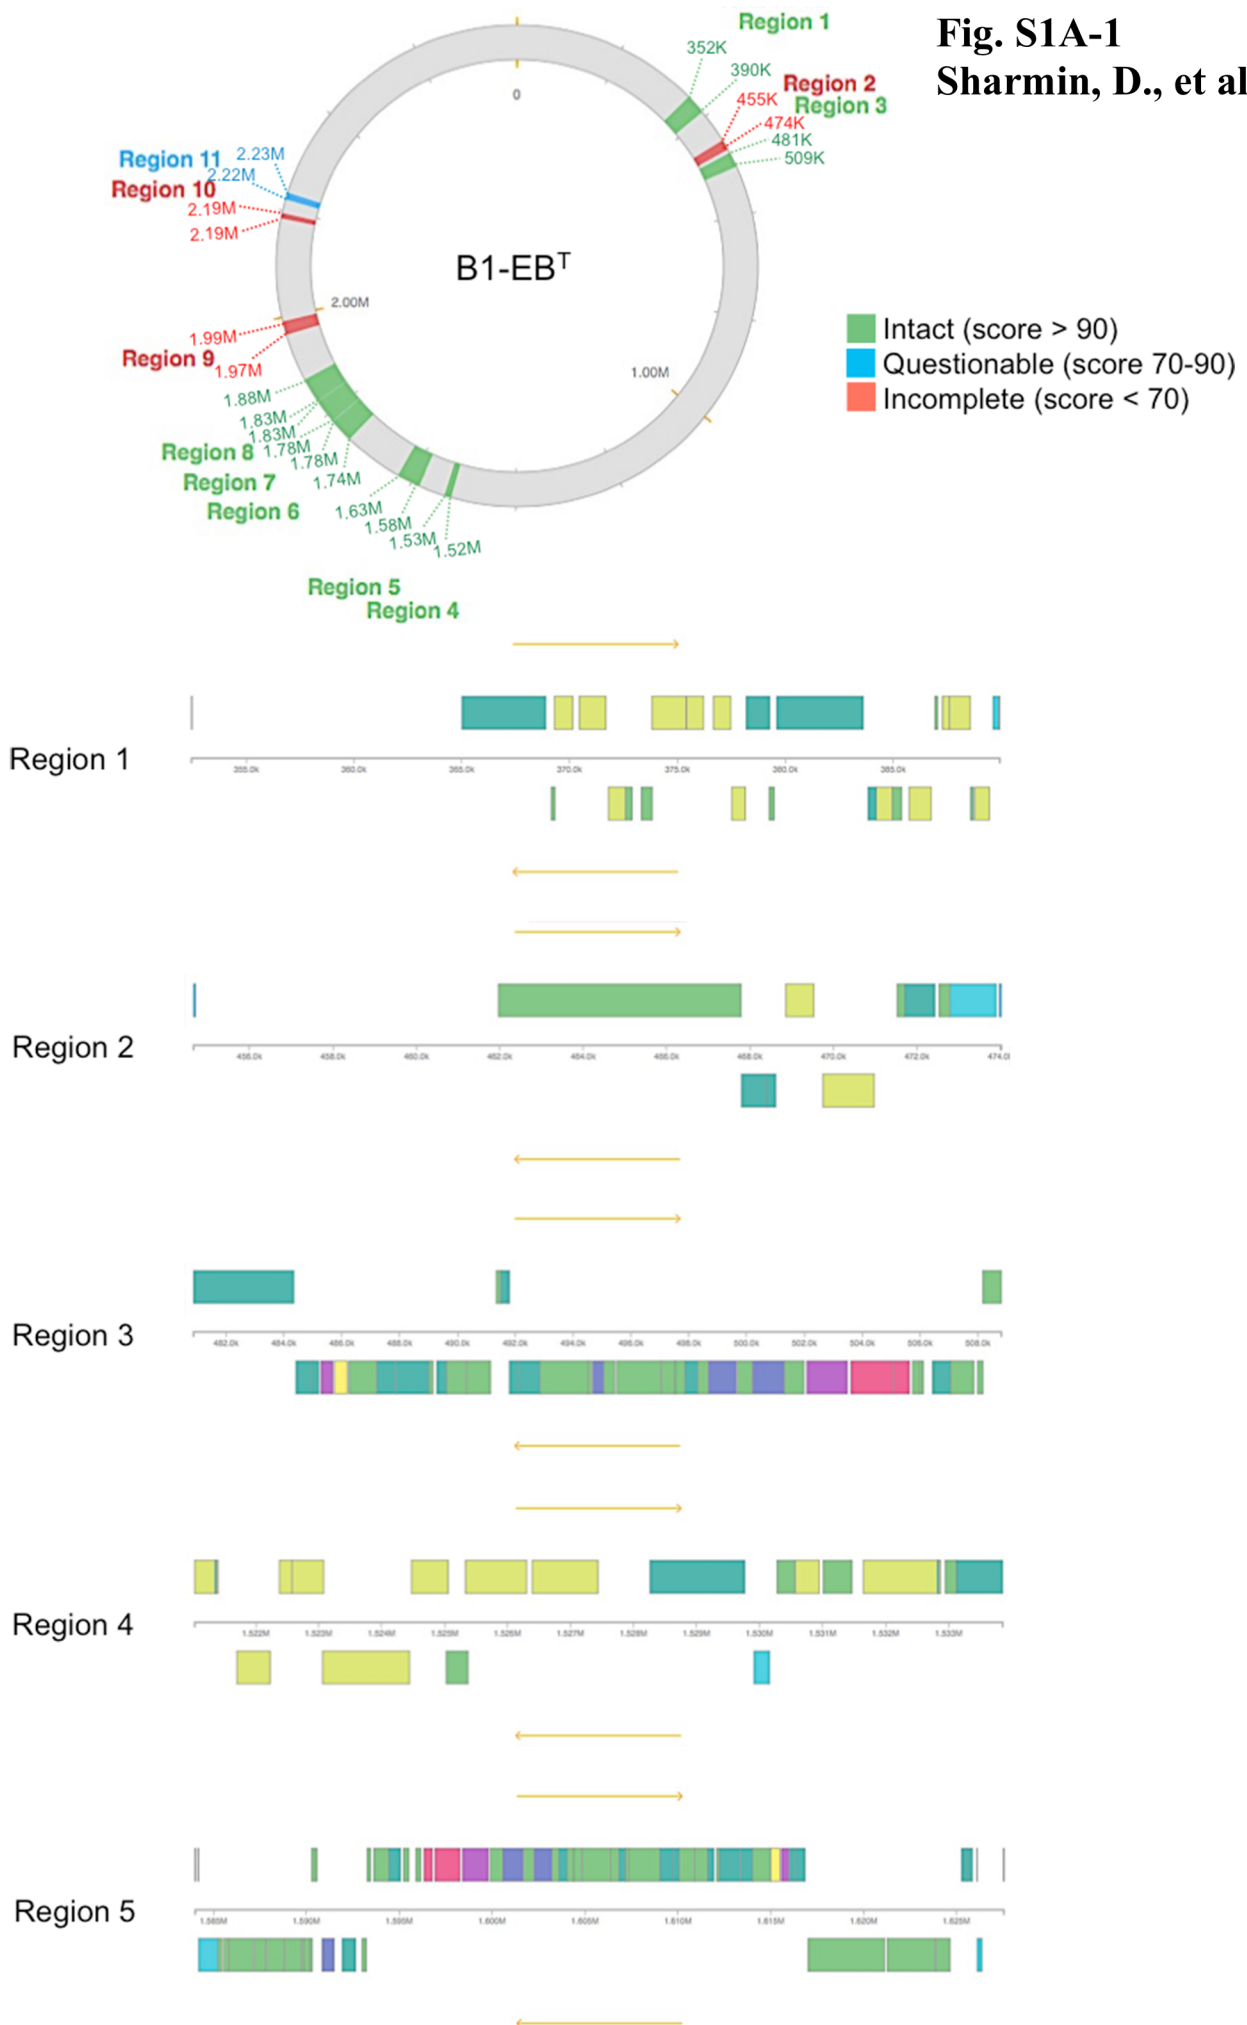

**Fig. S1A-2**  
**Sharmin, D., et al**

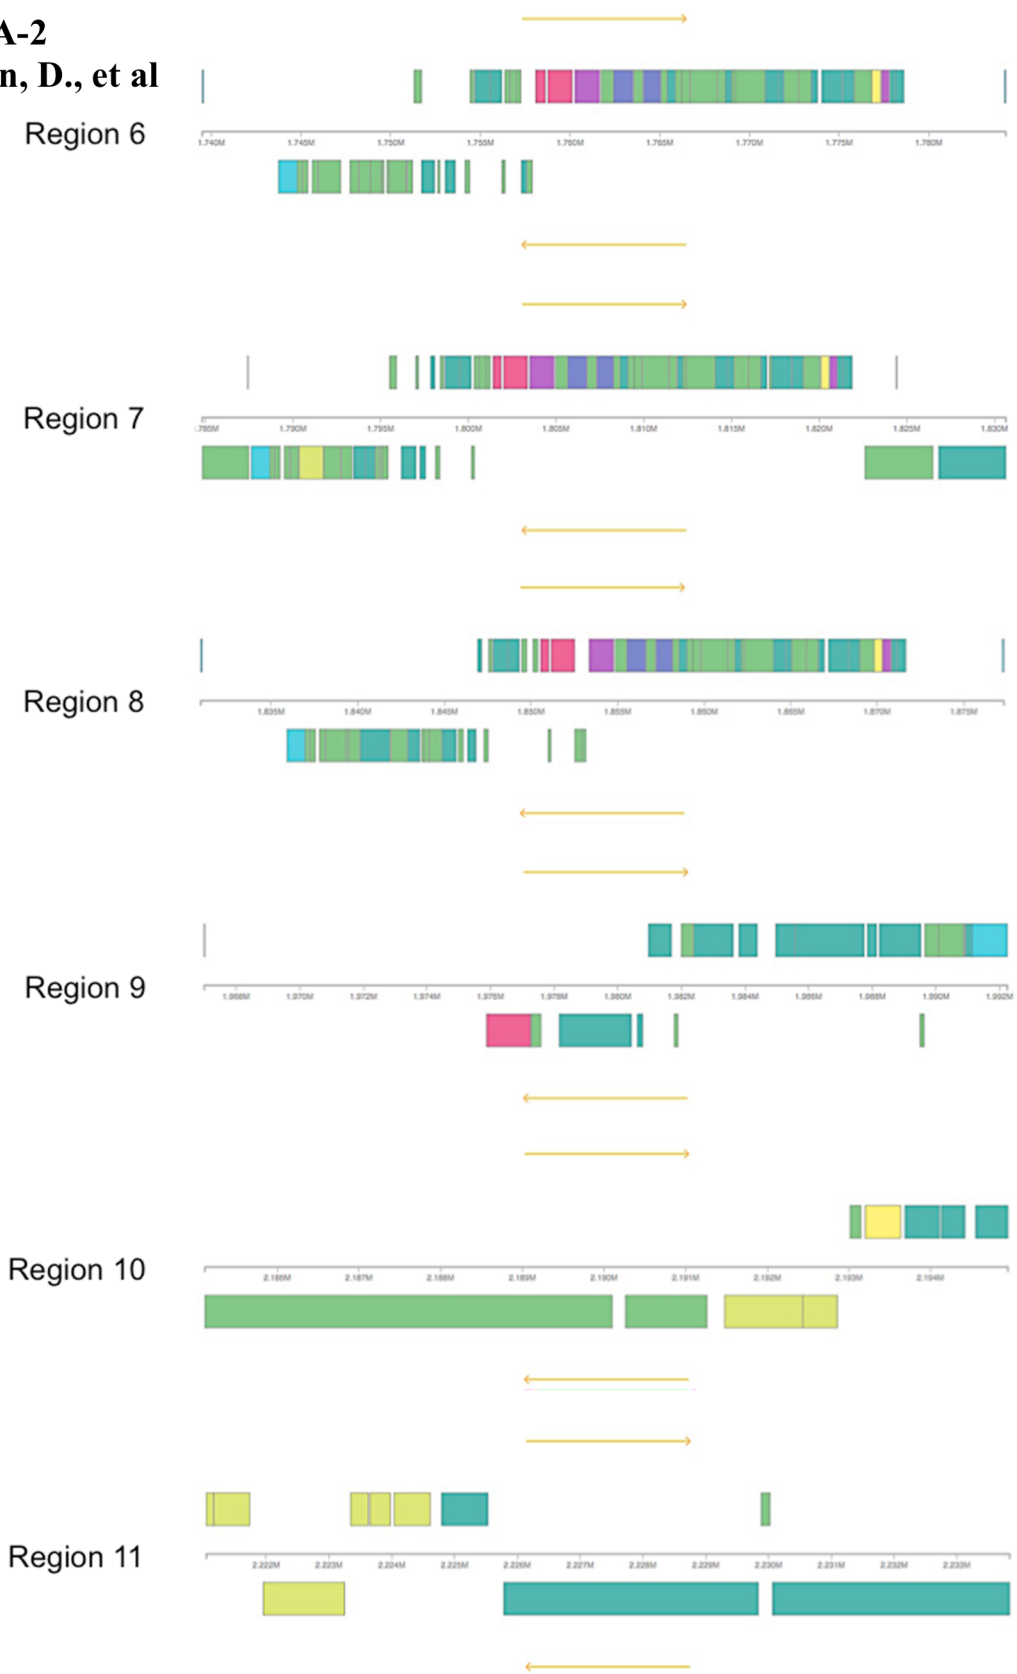

- |                                                       |                                                  |                                                            |                                                           |                                                     |
|-------------------------------------------------------|--------------------------------------------------|------------------------------------------------------------|-----------------------------------------------------------|-----------------------------------------------------|
| <span style="color: red;">■</span> Lysis              | <span style="color: purple;">■</span> Protease   | <span style="color: cyan;">■</span> Attachment site        | <span style="color: green;">■</span> Hypothetical protein | <span style="color: yellow;">■</span> Fiber protein |
| <span style="color: pink;">■</span> Terminase         | <span style="color: blue;">■</span> Coat protein | <span style="color: lightblue;">■</span> Integrase         | <span style="color: lightgreen;">■</span> Other           | <span style="color: orange;">■</span> Plate protein |
| <span style="color: magenta;">■</span> Portal protein | <span style="color: teal;">■</span> Tail shaft   | <span style="color: darkteal;">■</span> Phage-like protein | <span style="color: limegreen;">■</span> Transposase      | <span style="color: darkorange;">■</span> tRNA      |

**Fig. S1B-1**  
**Sharmin, D., et al**

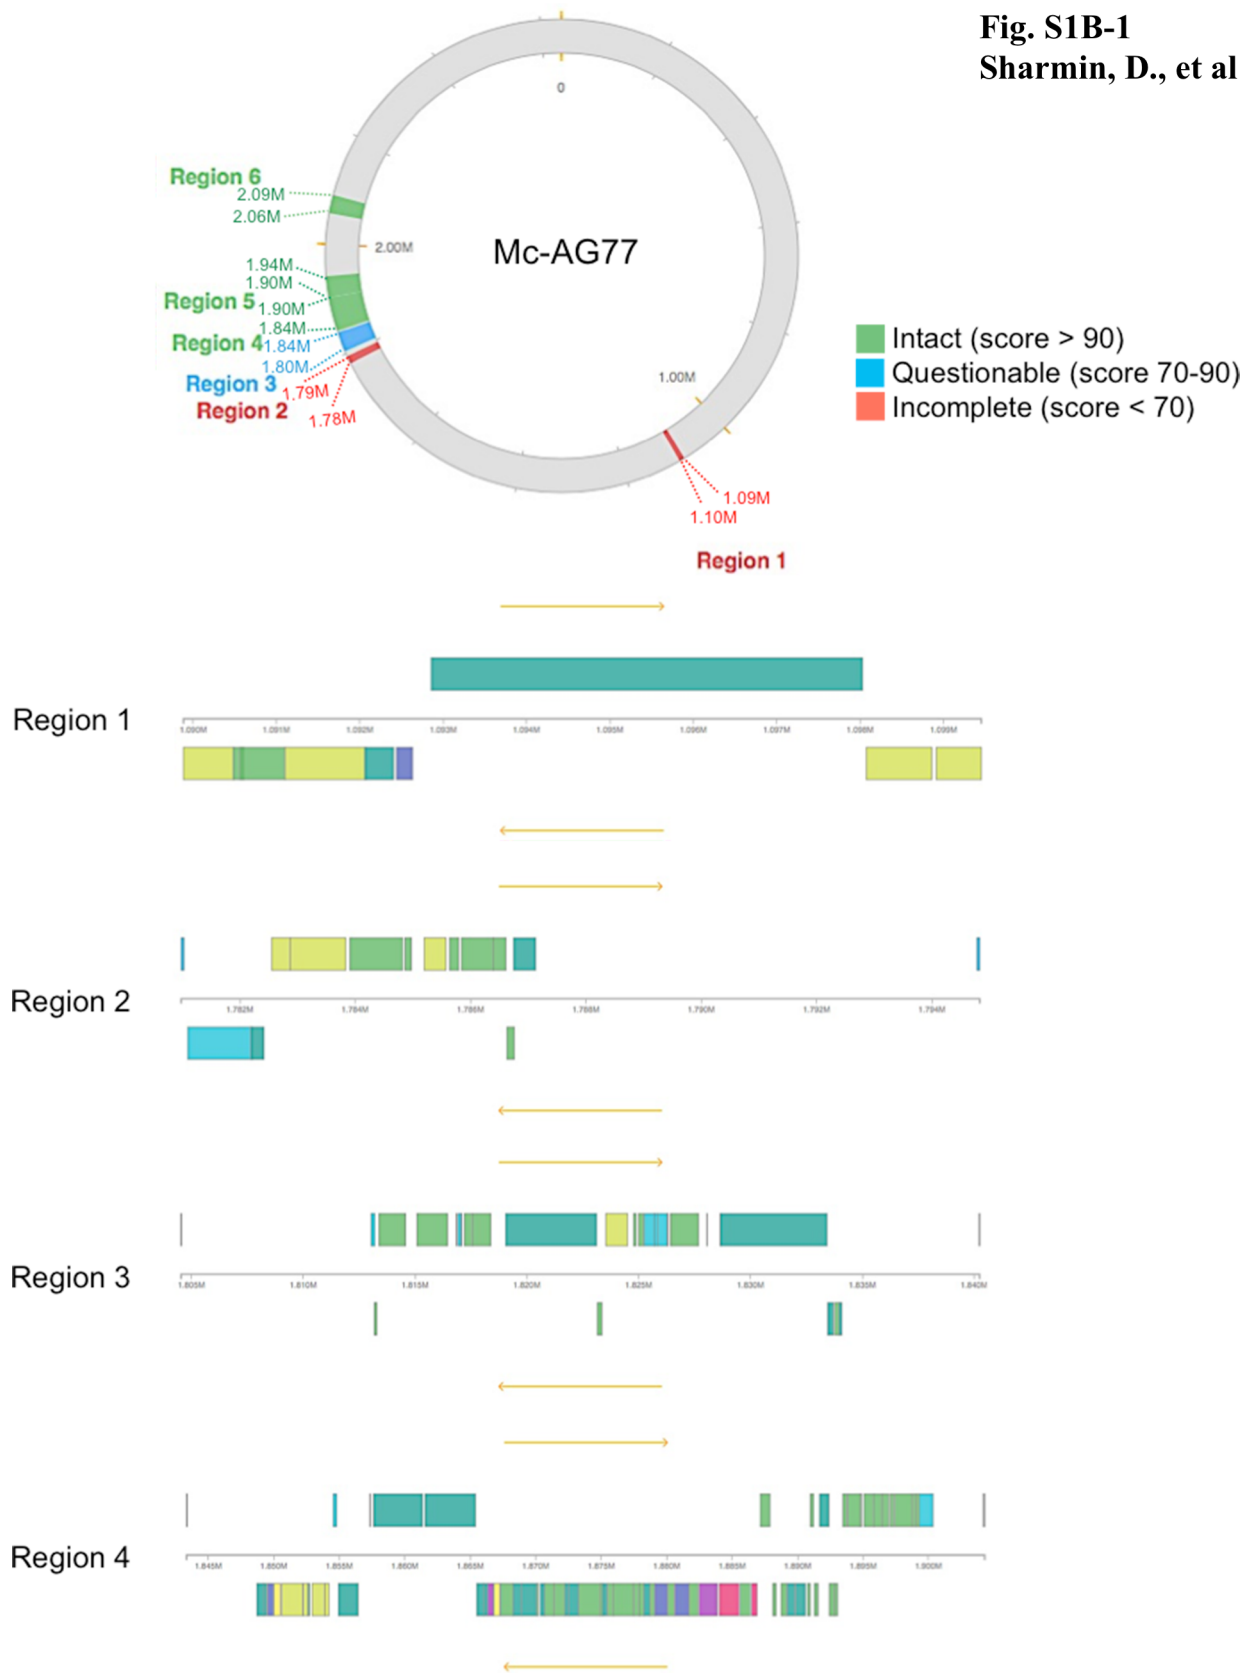

**Fig. S1B-2**  
**Sharmin, D., et al**

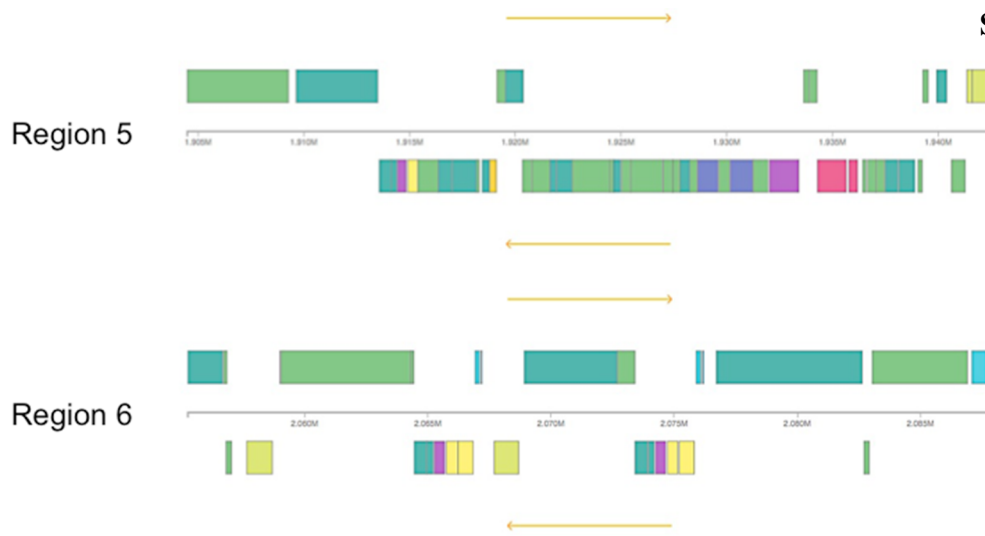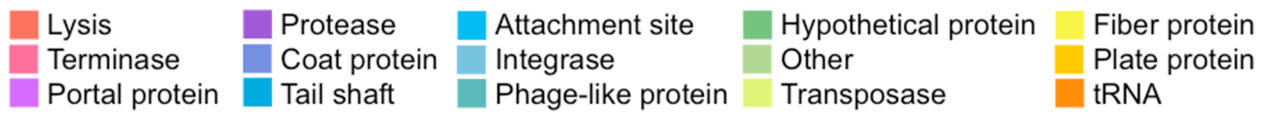

**Fig. S1C**  
Sharmin, D., et al

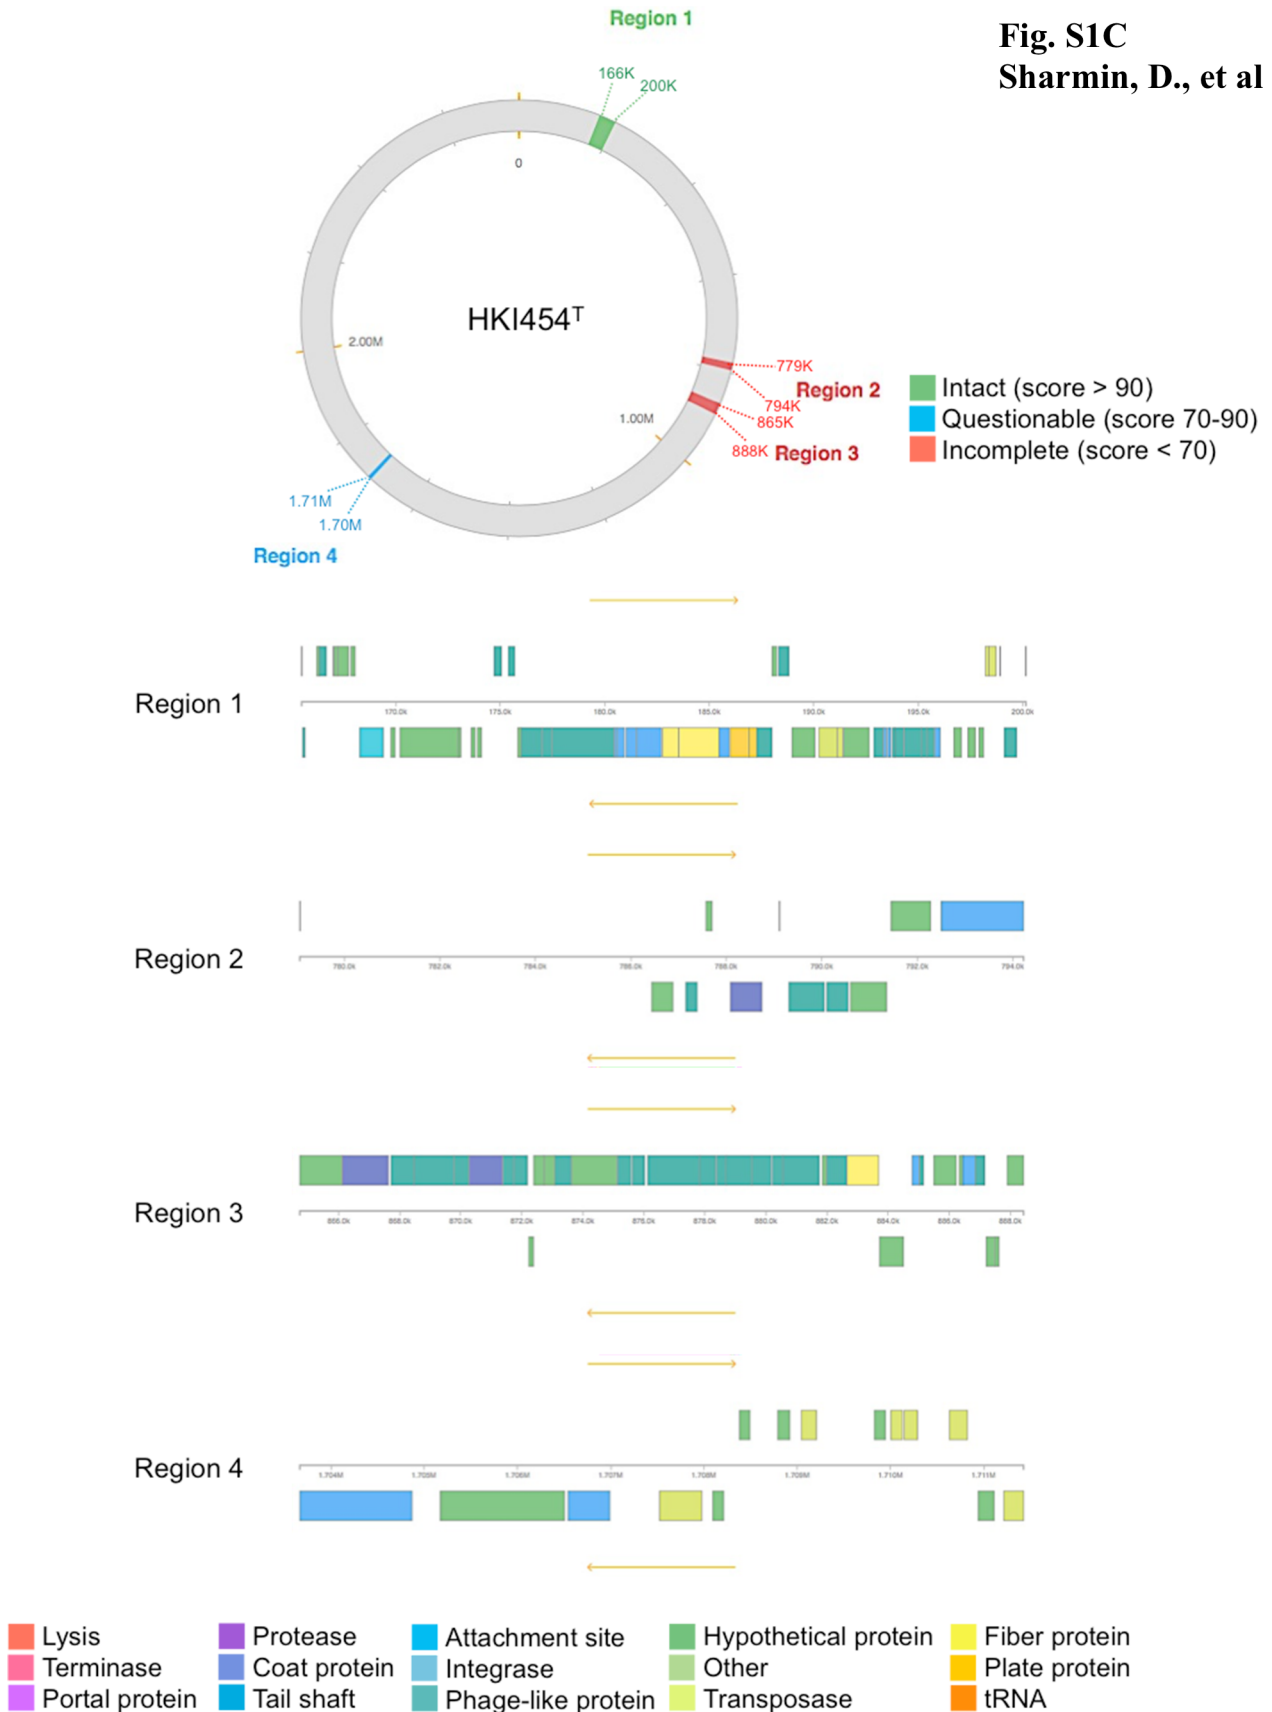

**Supplemental Fig. S1.** Prophage sequences within the genomes of (A) B1-EB<sup>T</sup> (B) Mc-AG77 and (C) HKI 454<sup>T</sup> chromosome. The details are showed in each region. Position-based identification of gene functions is shown in colors. Scale bar is in K/M bp.

**Fig. S2**  
**Sharmin, D., et al**

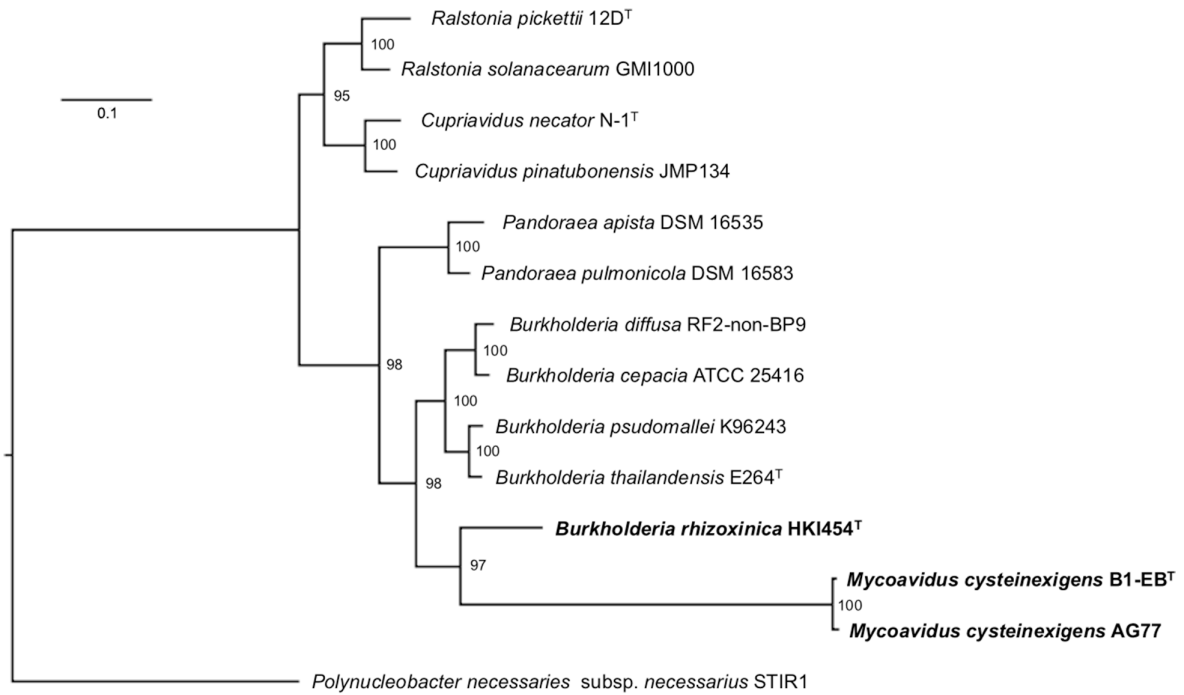

(Pairwise distance between B1-EB<sup>T</sup> and Mc-AG77 is 0.011)

**Supplemental Fig. S2.** Randomized accelerated maximum likelihood (RAxML) tree based on concatenated sequences (12,492 positions in total) of 16S ribosomal RNA and the five housekeeping genes (*atpD*, *gyrB*, *lepA*, *recA*, and *rpoB*) indicating the relative placement of the three endofungal bacteria (bold) and other genera in the family *Burkholderiaceae* and *Ralstoniaceae*. The horizontal lines show genetic distances, which are supported by values estimated with 100 bootstrap replicates. The scale bar indicates the number of substitutions per nucleotide position.
